# Supplementary material for: Disintegrins from Hematophagous Sources
Source: Toxins (Basel). 2012 Apr 26;4(5):296–322. doi: 10.3390/toxins4050296 (PMC3386632; doi:10.3390/toxins4050296)
Supplement: Supplementary File 1: — PDF-Document (PDF, 67 KB) [file toxins-04-00296-s001.pdf]

(A)

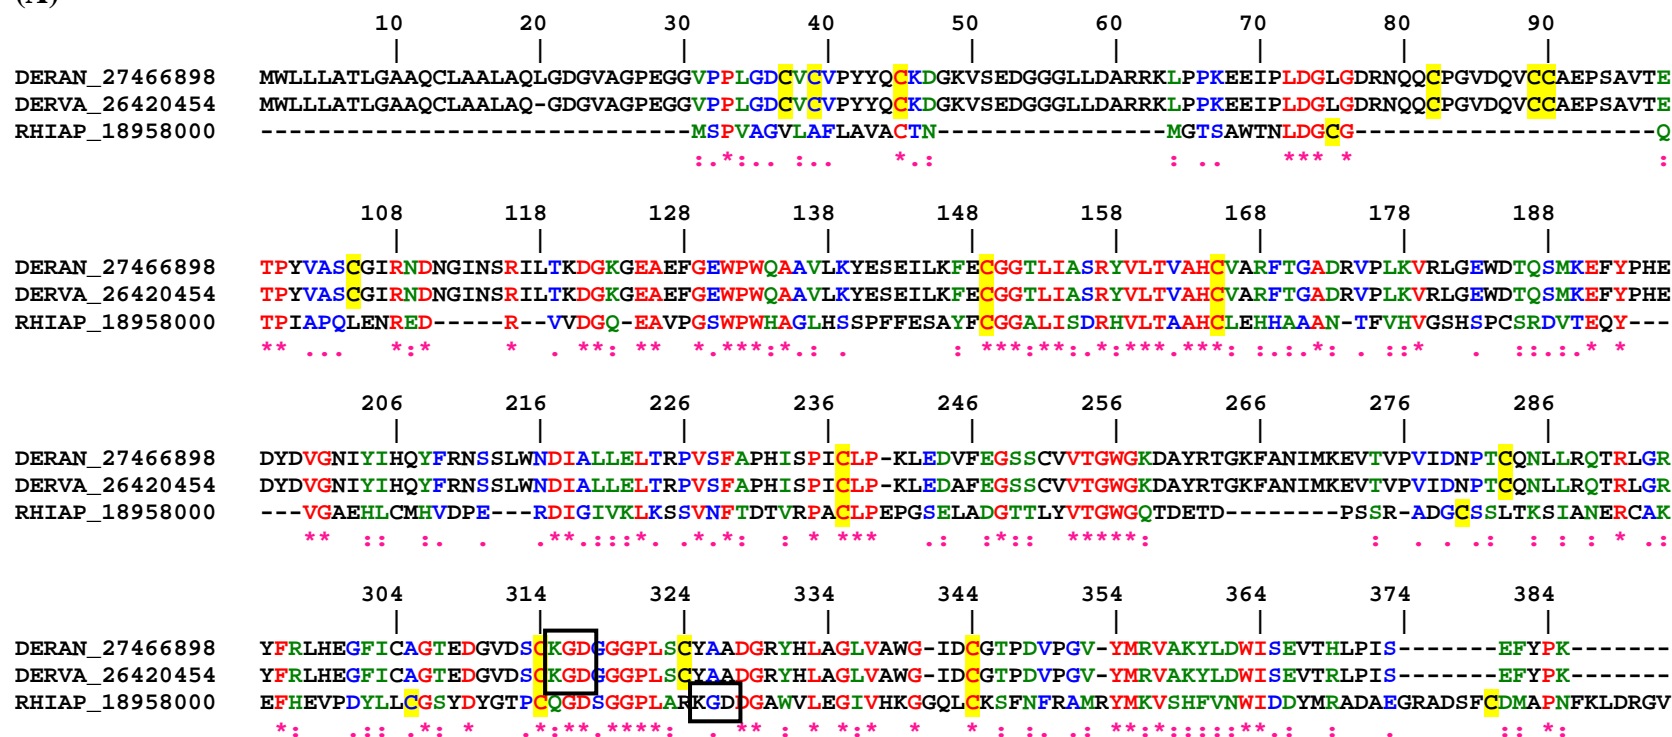

(B)

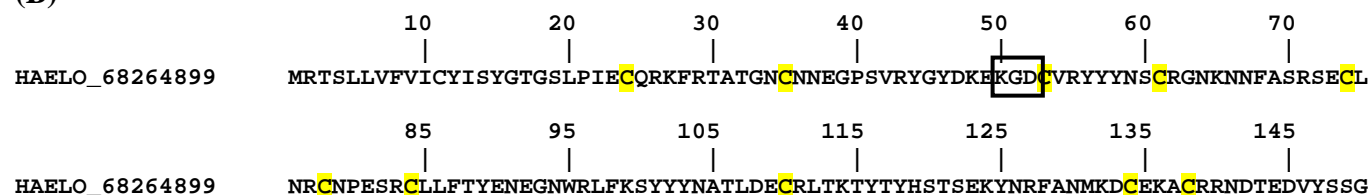

(C)

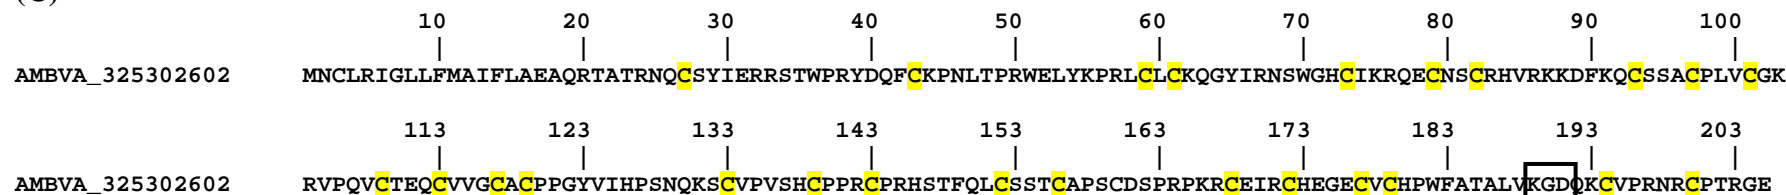

Figure 1-S – metastriate – KGD (midgut serine proteinase)

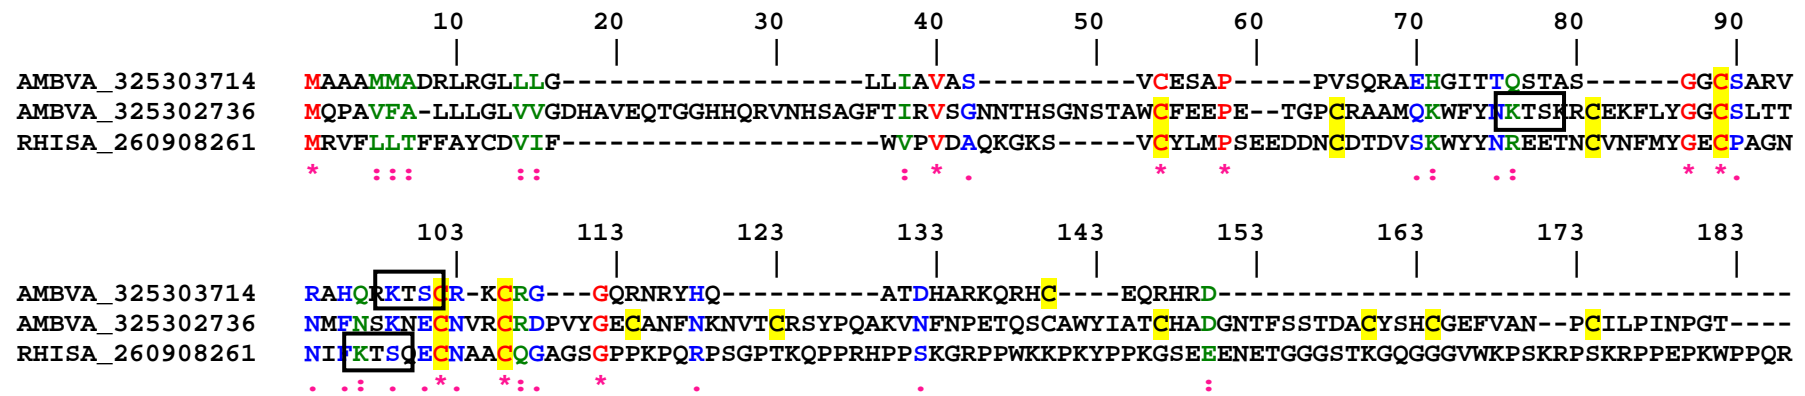

Figure 2-S – metastriate - KTS

|                 |                                                                                                      |     |     |     |     |     |     |     |     |
|-----------------|------------------------------------------------------------------------------------------------------|-----|-----|-----|-----|-----|-----|-----|-----|
|                 | 10                                                                                                   | 20  | 30  | 40  | 50  | 60  | 70  | 80  | 90  |
| RHISA_260908518 | ---MIFVMAAVLASSVVELSEASGTNQSCGDP--IQELGGACSNTEVKQRWGYDSSGKCVKFLSWDCCKN-----RNNFPTVKECLETCN-----      |     |     |     |     |     |     |     |     |
| RHISA_260908350 | MDKRAFVLILVLSN-IVPLLAWGSLARVYRRPKTTAKTQQDIQPKAFAARSQYQRGAAKGYKVYQPKCYS-----RTSGTCIYPLLCLCRP-----     |     |     |     |     |     |     |     |     |
| RHIAP_28932710  | -MKLLCALALVALGLPFGSAYLGGFGGLGGWGGGLGAIFGPGAYPGFYGLNKRCTSWAAGSTISSGDSRTPPGIGAAERGTLSPTYPLDINTVQDPVTW  |     |     |     |     |     |     |     |     |
|                 | ..                                                                                                   | *   | .   | .   | ..  | .   | .   | .   | .   |
|                 | 109                                                                                                  | 119 | 129 | 139 | 149 | 159 | 169 | 179 | 189 |
| RHISA_260908518 | --RDSQCLKDPKRFSLPFHETFYFNVNKEKCEKKRTTNKRTSISKNNRFGSEKECMDQCMFK-----NFELITHSMQ-----                   |     |     |     |     |     |     |     |     |
| RHISA_260908350 | --RDELGFHR---VTDADKRWYYNNSTGRCEERMAAPNGCNDFHDKEMCERHCYNVTERVRS---FWNASYVQAVLRQ-----                  |     |     |     |     |     |     |     |     |
| RHIAP_28932710  | PPHGTRCLRR--RLAGAPSRRTSPNSTGCACSPHSSAPAIPSPTPTTSSIPSA CPYPVPIHSNTEVHKTDVVAATPGGPVLLLESGVTGVRPGEPRVVA |     |     |     |     |     |     |     |     |
|                 | ..                                                                                                   | ..  | .   | *   | .   | *   | .   | ..  | .   |

Figure 3-S – metastriate – RTS



|                 |                     |             |              |                |           |            |               |                    |
|-----------------|---------------------|-------------|--------------|----------------|-----------|------------|---------------|--------------------|
|                 | 10                  | 20          | 30           | 40             | 50        | 60         | 70            |                    |
| IXOSC_241690880 | MEMKTLGAALALTFAAASL | VAFVGAQ     | PVNDDNFK---  | EV             | PVGYDEV   | TPTPREVGQS | CNAYSLCKSGL   | CCLQS-DLSSP        |
| IXOSC_67083399  | --MNTFIVVLVSSLALTM  | FEVFADPD    | QQPDVTY---   | SV             | PSG-----  | I          | CSKNSECGPNL   | CCRETKKGDMA        |
| IXOSC_241250787 | MALYGATPSVCTMALLLL  | LGLSAVPG    | GHGDDAFFRRRL | VP             | ES-----   | LQ         | TLGGDGSTQVLGR | PEFFKAPREDQAEA     |
| IXOSC_241859419 | -MAFSLAGSLGLATTSA   | LRRRTSAIR   | CLATSTENIADL | V              | KG-----   | DK         | VVVF          | FMKGVPE            |
|                 | :                   | :           | .            | :              | .         |            |               |                    |
|                 | 88                  | 98          | 108          | 118            | 128       | 138        | 148           |                    |
| IXOSC_241690880 | ITTCQPR             | SAPG-----   | QRCTGVQ      | VESPFYLDY      | CPCIKGD   | --RLFF     | SPHC-----     |                    |
| IXOSC_67083399  | VVTCAPL             | AKSG-----   | VP           | CSNSETGDEPYKTY | CS        | CETG----   | LECINNVC      | TALPAPVPVE-----    |
| IXOSC_241250787 | VADLPSL             | MDESQL----- | QD           | CHIEVQVTERLRGH | CSTLELM-- | GKNFPV     | CKGDHLS       | VNHHECSHA-----     |
| IXOSC_241859419 | QYKAHDV             | MEDENLRQGI  | KAYSNWPTIPQ  | VYIDGQFVGG     | CDILLQ    | MHQNGEL    | IDELAKVGI     | KSLLVDAAPASEQETTKK |
|                 |                     |             |              | *              |           | :          |               |                    |

Figure 5-S – prostriates - KGD

|                 |                                      |                                        |                                    |                                            |                                                |                                |                                   |                                   |       |
|-----------------|--------------------------------------|----------------------------------------|------------------------------------|--------------------------------------------|------------------------------------------------|--------------------------------|-----------------------------------|-----------------------------------|-------|
|                 | 10                                   | 20                                     | 30                                 | 40                                         | 50                                             | 60                             | 70                                | 80                                |       |
| IXOSC_67083629  | ----                                 | MSGIEL                                 | LILL---                            | LFHICIVYGAETTKCNLT                         | <b>KTS</b>                                     | CPGLKEK-WHFNGLIG-----          | RCERSTPSFC                        | CGGKDN                            |       |
| IXOSC_67083208  | ----                                 | MSGIKL                                 | LILL---                            | LFHICIVCGVETTQC�LT                         | <b>KTS</b>                                     | CPRRKQÑ-WHFNYLIG-----          | RCERSTTSF                         | CGGKDI                            |       |
| IXOSC_241802506 | ----                                 | MNHSTL                                 | LLLLGAAFACTIGLCRAGVYKD             | LAECTTENVEKCGVDFVPYFGGNTL---               | AVNAADLEKQ                                     | <b>C</b> TEYLTQ                | LK                                |                                   |       |
| IXOSC_241998684 | ---                                  | MLRTIA                                 | VACL---                            | LLGLFEYTAAGPTTKTPAG                        | CGTESFEK                                       | CGTDLIIFAGGPVI---              | PVSKEELVTT                        | <b>CPKE</b> <b>KTS</b> <b>SEK</b> |       |
| IXOSC_241165998 | --                                   | MKIPGAI                                | GLAAFVVC                           | AFVLRQGSAA                                 | SAKCAFPR                                       | TTS                            | CFKSHLNDLTGNLTDLTRKQGAALDAAL      | TNYTRRFSAAFQC                     |       |
| IXOSC_242002184 | MPSTVHYPA                            | ILLCTLSLLAVFLVADSKTLKEGD               | CEV                                | CVGALKKLH                                  | DRLEVEERS-----                                 | NEGSVEAGFLEF                   | <b>C</b> <b>KTS</b> <b>K</b>      |                                   |       |
| IXOSC_241250792 | ---                                  | LCLGL                                  | LLLASSVSAARAGTRPHPGGNQRTLLRPLPSHDL | PVIDLVEPAGHVYDP--                          | GPEDLDITRLQRTLAGHFDP                           |                                |                                   |                                   |       |
| IXOSC_241159543 | -----                                | MSIVKTALLVVLGVVCVSSAFPGVWRKHHPD        | VDP                                | PRYKEWAHFAIS-----                          | SQVEDRTNFD                                     | TLMTL                          |                                   |                                   |       |
| IXOSC_332691297 | -MLTVSLLT                            | LSLAAY-ASAVATVTDANNFMDAVLHTRIPALITSEPI | LPFPFATIP-----                     | PFNFTVAGTNIL                               | TNREL                                          |                                |                                   |                                   |       |
|                 | :                                    |                                        |                                    |                                            |                                                |                                |                                   |                                   |       |
|                 | 90                                   | 100                                    | 110                                | 120                                        | 130                                            | 140                            | 150                               | 160                               |       |
| IXOSC_67083629  | TFPDFKE                              | <b>C</b> QRT                           | CENAEIITAED                        | CRMALNKGIC                                 | EHKKKGRPKK                                     | P-----                         | ITRWYFNSTDSN                      | CHKFMWQR                          | CSGNR |
| IXOSC_67083208  | TFSSFE                               | <b>C</b> QRT                           | CEKEEIVSPQD                        | CRMNFNRGT                                  | CEEKRGPRKKW--                                  | -----                          | VYRWYFNSTDSQ                      | CHRFQWYR                          | CSANR |
| IXOSC_241802506 | SDDFSVK                              | <b>C</b> LDGLPKGTILLMLRAARDEYDAI       | CNVTS                              | SPRHQ                                      | <b>C</b> <b>KTS</b> <b>V</b> L---              | TVCS-LKPF                      | CSFSGHSYYADFAN                    | <b>C</b> ATSGLK                   |       |
| IXOSC_241998684 | ARAYAQK                              | <b>C</b> LARFPRGMVMLLLD                | GIRTEVNAK                          | CND                                        | SGAGHQG-----                                   |                                |                                   |                                   |       |
| IXOSC_241165998 | FVESEK                               | <b>C</b> ANSQETQYIGRVQSTSDLLVREL       | TNKTALTAIVTAYK                     | <b>C</b> ----                              | HDVERFTP                                       | CMSKAIRDFLSEPI                 | <b>C</b> <b>KTS</b> <b>K</b> ADAK |                                   |       |
| IXOSC_242002184 | PEHRF                                | <b>C</b> YYVGGLEESATKIVNELTKPFSWGM     | PALKV                              | CEKL                                       | VAK-----                                       | DSQIC                          | CDLKYPKVIDLK                      |                                   |       |
| IXOSC_241250792 | KFMAVHRPKESFLHPNGSLQPGFRLKKGRLVPARMP | PRDLQ                                  | IRLKG                              | LDLDFPGGIK                                 | VRLDLGRKLRRKL                                  | RQLLW                          | TYTY                              | <b>C</b> PL                       |       |
| IXOSC_241159543 | ISVESQVIAGVDYKLKMKVAESN              | CVIGVDSYSRER                           | CHLKVDAP-----                      | YMIC                                       | TALVNYPWEH                                     | <b>C</b> <b>KTS</b> <b>L</b> K |                                   |                                   |       |
| IXOSC_332691297 | QVNVSRGEIRGFSTEVKRVGD                | CMP                                    | PVLR                               | <b>C</b> <b>KTS</b> <b>I</b> RCTLNFTGIN--- | ATFDTHTRGDNIVASDKNIWVRASVIDTTGQF               |                                |                                   |                                   |       |
|                 | 170                                  | 180                                    | 190                                | 200                                        | 210                                            | 220                            | 230                               |                                   |       |
| IXOSC_67083629  | NNFPTKQD                             | <b>C</b> MVC                           | QRAIPTTP-----                      | TTSTTPATSTTPATPATPAAPAQT--                 | TPPA-----                                      |                                |                                   |                                   |       |
| IXOSC_67083208  | NNFPTKED                             | <b>C</b> QIC                           | QKAMPTTP-----                      | TTSTTPATSTTPATPATPAAPAET--                 | TPPPEC-----                                    |                                |                                   |                                   |       |
| IXOSC_241802506 | TK                                   | <b>C</b> GDKEAEAFFDTIIQHVFGEVLDL----   | ACGKYRAGSEAC                       | SLTPLPTVDDARAKDKGFIEPLTVIASKLG----         |                                                |                                |                                   |                                   |       |
| IXOSC_241998684 | -----                                |                                        |                                    |                                            |                                                |                                |                                   |                                   |       |
| IXOSC_241165998 | TL                                   | <b>C</b> SNVDDASKT                     | <b>C</b> LVARN                     | CTPAAE-----                                | PGKKAVRKLFTSFRTIWG                             | CKGGSGAPAATSVLPTVSVMLALIARKML  |                                   |                                   |       |
| IXOSC_242002184 | TVNLKKLKV                            | KDLKKILSDWD-----                       | ER-                                | <b>C</b> EG                                | CVEKTD                                         | DFVKRIEELKTVHMREEL-----        |                                   |                                   |       |
| IXOSC_241250792 | VYRWKDLGLRFWPRWI                     | REGR                                   | CYNSRRS                            | CSFPPGMT                                   | <b>C</b> <b>R</b> <b>KTS</b> <b>A</b> EKTVLRWH | CRDWTQRRQ                      | CRWIPATLSVLVE                     | <b>C</b> <b>S</b> <b>C</b>        |       |
| IXOSC_241159543 | SYN                                  | <b>C</b> SDRVYG                        | VKAAE-----                         |                                            |                                                |                                |                                   |                                   |       |
| IXOSC_332691297 | EAVAERGKQGNVHTFLVDKIHVKVKN           | KALSLNDRK                              | KKKFRQHFEDKVL                      | TVLPQIFYGAYLHLLGA                          | AVSSVPFPHV--                                   |                                |                                   |                                   |       |

Figure 6-S – prostriates – KTS

|                 |                                                                                                                                                                                                                                                                                 |     |     |     |     |     |     |     |     |     |
|-----------------|---------------------------------------------------------------------------------------------------------------------------------------------------------------------------------------------------------------------------------------------------------------------------------|-----|-----|-----|-----|-----|-----|-----|-----|-----|
|                 | 10                                                                                                                                                                                                                                                                              | 20  | 30  | 40  | 50  | 60  | 70  | 80  | 90  | 100 |
| IXOSC_67083443  | -----MEIWWCRLFLVLVIVAAMQAR--GDPGVPTPCEDRLPNVATCSEGA <sup>SEAWYFDLEKVC</sup> RSI <sup>IGCNYSTNYFENSTE</sup> CE <sup>SV</sup> CD <sup>PKY</sup> CLLEKPQE                                                                                                                          |     |     |     |     |     |     |     |     |     |
| IXOSC_242000850 | MGPCYRRSGALFAPLLWLLVGVGSRR <sup>RD</sup> CGDPVVRTAEARLTSPNYPLAYPAGV <sup>RC</sup> SYRVLP <sup>SWPGVC</sup> AVLLSFEDMD <sup>IEG</sup> --TPPN <sup>CH</sup> RGD <sup>D</sup> --VLRVP-S                                                                                            |     |     |     |     |     |     |     |     |     |
| IXOSC_241719667 | -----MFWLLSQ <sup>TLL</sup> FIDVHGNGV <sup>R</sup> -----SPLCGGALITPQHVLTA <sup>AHCT</sup> FNGN <sup>KS</sup> SLTPDA <sup>F</sup> VARLGEHDYLSN <sup>N</sup> -----DD-----                                                                                                         |     |     |     |     |     |     |     |     |     |
|                 | .                                                                                                                                                                                                                                                                               | :   | :   | :   | .   | :   | :   | :   | :   | *   |
|                 | 112                                                                                                                                                                                                                                                                             | 122 | 132 | 142 | 152 | 162 | 172 | 182 | 192 | 202 |
| IXOSC_67083443  | PVDAC <sup>VD</sup> QEKKT <sup>EPNLDN</sup> QK <sup>NS</sup> SLWY <sup>FDK</sup> KL <sup>RK</sup> CVETDELSRNT <sup>FPSQRH</sup> CQAS <sup>CAKYSV</sup> CYAQESAW <sup>NQRR</sup> CNP <sup>ELVWY</sup> FDPI <sup>RKD</sup> C <sup>FY</sup> GK <sup>RC</sup> GNST <sup>NR</sup> FA |     |     |     |     |     |     |     |     |     |
| IXOSC_242000850 | TGDSFC <sup>GV</sup> TPPE <sup>SLVLP</sup> QGG <sup>LTLE</sup> FSSD <sup>TERS</sup> GVGFALRLA <sup>QV</sup> NSC <sup>PTDVT</sup> SPC <sup>GGRF</sup> SEQEFRI <sup>EG</sup> PSARS <sup>GAC</sup> LYLVTKFRDD <sup>VC</sup> QL <sup>QL</sup> --YDRFS                               |     |     |     |     |     |     |     |     |     |
| IXOSC_241719667 | -----GANPVDEPVVQ <sup>IHR</sup> S-----D <sup>NS</sup> RTYLNDVAVLKLRRP <sup>VPLN</sup> KDIALI <sup>C</sup> LPY <sup>G</sup> PLQTD <sup>TYEG</sup> KMANIAGWGEL <sup>Y</sup> YGGPSSASL <sup>Q</sup> DT <sup>RIP</sup> --IQSLD                                                      |     |     |     |     |     |     |     |     |     |
|                 | .                                                                                                                                                                                                                                                                               | :   | :   | :   | *   | .   | :   | :   | *   | :   |
|                 | 214                                                                                                                                                                                                                                                                             | 224 | 234 | 244 | 254 | 264 | 274 | 284 | 294 | 304 |
| IXOSC_67083443  | TRED <sup>CL</sup> RE <sup>CP</sup> YAGE <sup>IPE</sup> CHLEKDYGSS <sup>CP</sup> PA-----ESGR <sup>EW</sup> GSWKA <sup>F</sup> PLARASLRWYDYVDGE <sup>CR</sup> SFIYQ <sup>CG</sup> GN <sup>EN</sup> FP <sup>TKRT</sup> CNAI <sup>CR</sup> HRTS <sup>Y</sup> ITGTA                 |     |     |     |     |     |     |     |     |     |
| IXOSC_242000850 | -----VGDI <sup>AS</sup> CTHGRRLIVAG <sup>TP</sup> -----ECGR <sup>KPP</sup> GKVD <sup>VE</sup> FFPSRTL-----T-LLYLGGDS <sup>AH</sup> DSFVLDFFQE <sup>EC</sup> PDTR-----                                                                                                           |     |     |     |     |     |     |     |     |     |
| IXOSC_241719667 | T-----CKESF <sup>RTS</sup> ITFTDNYLCAG <sup>SI</sup> KGD <sup>KDA</sup> RGD <sup>S</sup> GGLMLLDQ <sup>QER</sup> FT-----IIGITSF <sup>GRR</sup> CAEP <sup>G</sup> YPGVYTRVAKYL <sup>D</sup> WIAQRLN--                                                                            |     |     |     |     |     |     |     |     |     |
|                 | .                                                                                                                                                                                                                                                                               | :   | :   | :   | .   | :   | :   | *   | :   | .   |

Figure 7-S – prostriates – RGD and KGD – 2 domains

|                 |                                                                                           |    |    |    |    |    |    |    |
|-----------------|-------------------------------------------------------------------------------------------|----|----|----|----|----|----|----|
|                 | 10                                                                                        | 20 | 30 | 40 | 50 | 60 | 70 | 80 |
| ARGMO_114152962 | ----MRLLALFAFAVAVVSAQR-----NQMCQQPRTQGS CDASNQITKFFY--TSGGCT SAPVCS-DTDGGYGTEDECIQACTVQGG |    |    |    |    |    |    |    |
| ORNPA_149287150 | -MEAKVFIICILVFLGVSHSTRG---IADKCRKQRQE-CPDKRTGLRRYFFNQTKERCSSFFACPGEGDNFYPMMKDCVKDCRPKQR   |    |    |    |    |    |    |    |
| ORNC0_172051234 | -MDRLAVILTCWL VAGVSESNA-----QCAAQADLD AWDLLDPAGHHTFLLVNSTKS SPRDCLKATAQGNPVKPN AQVELSFKIE |    |    |    |    |    |    |    |
| ORNPA_149287112 | MTCKFALVVFCLFVVGYVDAASDDLWKLLS ASDKFQLISRTYSLGASECAYMKVESRDQSTHTLNTLMGFRDGTTKQYSQPGSFTIT  |    |    |    |    |    |    |    |
|                 | ..                                                                                        | .. | .  | .  | .  | *  | :  | :  |

  

|                 |                                                                                              |     |     |     |     |     |     |     |
|-----------------|----------------------------------------------------------------------------------------------|-----|-----|-----|-----|-----|-----|-----|
|                 | 97                                                                                           | 107 | 117 | 127 | 137 | 147 | 157 | 167 |
| ARGMO_114152962 | H-----HNEGAGEEG-CSGDPE RGD CGGQVEERYFYDSTTRTC-----QTFEYRGCSSGNPDNSYETEIECEIACPSASS-----      |     |     |     |     |     |     |     |
| ORNPA_149287150 | Q-----PKCFEKELTT RGD TPGKTAWTHVRKTKQCEEVGNACGDTKNKFASKDECVAECFGFTKTGLQKKYKPKPKKEQG---        |     |     |     |     |     |     |     |
| ORNC0_172051234 | ERWAATNWEFVTNGPKMSATLGDRHEEATIVYGD D CHVKVLGSGNIEYWKRSDSSNPNPCQQRVFD E RGD RAFTEPQTKGCTGA-   |     |     |     |     |     |     |     |
| ORNPA_149287112 | VNGDQVTVRRASGSTGVSYNLVYSDGQGCN ILKGEKGG RGD ECELWAPLGQEAHAQGSTCTAKFGEHCAA AVQHYPYKAD CQIPEPK |     |     |     |     |     |     |     |
|                 |                                                                                              |     | .   |     |     | .   |     |     |

Figure 8-S – Soft ticks – RGD long





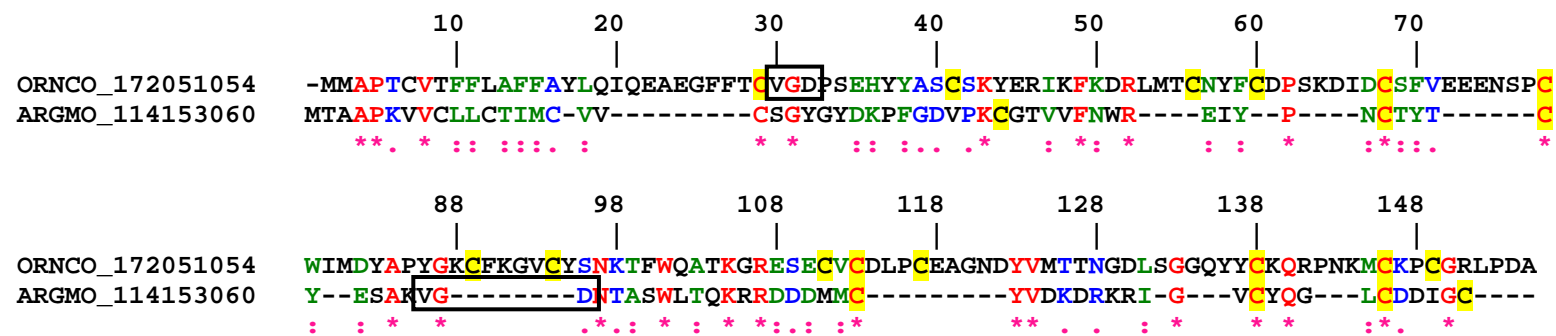

Figure 11-S – Soft tick – VGD
