# Supplementary material for: Disintegrins from Hematophagous Sources
Source: Toxins (Basel). 2012 Apr 26;4(5):296–322. doi: 10.3390/toxins4050296 (PMC3386632; doi:10.3390/toxins4050296)
Supplement: Supplementary File 2: — XLS-Document (XLS, 32752 KB) [file toxins-04-00296-s002.xls]

## Sheet: Non-redundant
Seq name and link to fasta sequence	Link to NCBI	Organism	Lineage	First residue	First residue	Seq size	Description	TMHMM result	Predicted helices	% membrane	% outside	% inside	Possible GPI?	SigP Result	Cleavage Position	MW	pI	Mature MW	pI	Disintegrin result	Number of domains	Best match to NR protein database	E value	Match	Score	Extent of match	Length of best match	% identity	% Coverage	Species of best match	Best match to SWISSP protein database	E value	Match	Score	Extent of match	Length of best match	% identity	% Coverage	Species of best match	Best match to PFAM database	E value	Best match to SMART database	E value	Best match to CDD database	E value	All CDD domains	Clustered at 25%-Sim- on 50% of length - - Cluster#	# seqs	Clustered at 30%-Sim- on 50% of length - - Cluster#
Arthropods
Bugs - Cimicomorpha - Includes Triabin, Kazal domain and Antigen 5 families, and one PHB
gi|730939	gi|730939	Rhodnius prolixus	Eukaryota; Metazoa; Arthropoda; Hexapoda; Insecta; Pterygota; Neoptera; Paraneoptera; Hemiptera; Euhemiptera; Heteroptera; Panheteroptera; Cimicomorpha; Reduviidae; Triatominae; Rhodnius.	E	E	103	Thrombin inhibitor rhodniin	ExpAA=0.00 First60=0.00 PredHel=0 Topology=o	0					CYT		11.114	4.36			ECD_cys disintegrin |	1	Thrombin inhibitor rhodniin gi|1827578|pdb|1TBR|R Chain R, Crystal Structure Of	1E-060	gi|730939	236	102	103	100	100	Rhodnius prolixus	Thrombin inhibitor rhodniin	4E-062	sp|Q06684|THBI_RHOPR	236	102	103	100	100	Rhodnius prolixus	Kazal_2	3E-006	KAZAL	7E-009	KAZAL	6E-007	KAZAL 6e-007| Kazal_2 1e-005| KAZAL_FS 1e-005| Kazal_1 2e-004| KAZAL_PSTI 0.002| oat 0.017| OATP 0.082| PLN00206 | KAZAL_SLC21 | Astro_capsid |	5	20	8
gi|1567702	gi|1567702	Rhodnius prolixus	Eukaryota; Metazoa; Arthropoda; Hexapoda; Insecta; Pterygota; Neoptera; Paraneoptera; Hemiptera; Euhemiptera; Heteroptera; Panheteroptera; Cimicomorpha; Reduviidae; Triatominae; Rhodnius.	M	M	186	thrombin inhibitor protein	ExpAA=0.01 First60=0.01 PredHel=0 Topology=o	0					SIG	16-17	20.283	5.05	18.641	4.88	ECD_cys disintegrin |	1	Thrombin inhibitor rhodniin gi|1827578|pdb|1TBR|R Chain R, Crystal Structure Of	5E-058	gi|730939	227	101	103	98	99	Rhodnius prolixus	Thrombin inhibitor rhodniin	3E-059	sp|Q06684|THBI_RHOPR	227	101	103	98	99	Rhodnius prolixus	Kazal_2	7E-007	KAZAL	2E-009	KAZAL	1E-007	KAZAL 1e-007| KAZAL_FS 3e-006| Kazal_2 4e-006| Kazal_1 8e-005| KAZAL_PSTI 0.001| oat 0.054| OATP 0.059| KAZAL_SLC21 | PRK07119 | PLN00206 |	5	20	8
gi|307094930	gi|307094930	Triatoma matogrossensis	Eukaryota; Metazoa; Arthropoda; Hexapoda; Insecta; Pterygota; Neoptera; Paraneoptera; Hemiptera; Euhemiptera; Heteroptera; Panheteroptera; Cimicomorpha; Reduviidae; Triatominae; Triatoma.	M	M	200	Tm434 salivary lipocalin	ExpAA=5.71 First60=5.70 PredHel=0 Topology=o	0					SIG	18-19	22.856	8.85	20.936	8.71	VGD_cys disintegrin |	1	Tm434 salivary lipocalin	1E-113	gi|307094930	411	199	200	100	100	Triatoma matogrossensis	Triabin	5E-012	sp|Q27049|TRIA_TRIPA	70.9	152	160	31	96	Triatoma pallidipennis	Triabin	2E-013	CLa	1.2	Triabin	1E-012	Triabin 1e-012| Nitrophorin | Piwi_piwi-like_ProArk | COG2421 | PLN02372 | RT_G2_intron | PTZ00287 | IL15 | wnt | RT_Rtv |	6	17	9
gi|307094854	gi|307094854	Triatoma matogrossensis	Eukaryota; Metazoa; Arthropoda; Hexapoda; Insecta; Pterygota; Neoptera; Paraneoptera; Hemiptera; Euhemiptera; Heteroptera; Panheteroptera; Cimicomorpha; Reduviidae; Triatominae; Triatoma.	M	M	188	salivary lipocalin	ExpAA=2.47 First60=2.47 PredHel=0 Topology=o	0					SIG	20-21	21.427	8.81	19.363	8.67	KGD_cys disintegrin |	1	salivary lipocalin	1E-107	gi|307094854	391	187	188	100	100	Triatoma matogrossensis	Triabin	9E-008	sp|Q27049|TRIA_TRIPA	56.6	149	160	26	94	Triatoma pallidipennis	Triabin	8E-015	HX	2.9	Triabin	4E-014	Triabin 4e-014| EutB | Lipocalin | putres_am_tran | MgsA | PRK15304 | PCC | PRK14908 | LIM2_LIMK2 |	6	17	9
gi|149898890	gi|149898890	Triatoma infestans	Eukaryota; Metazoa; Arthropoda; Hexapoda; Insecta; Pterygota; Neoptera; Paraneoptera; Hemiptera; Euhemiptera; Heteroptera; Panheteroptera; Cimicomorpha; Reduviidae; Triatominae; Triatoma.	M	M	197	salivary lipocalin	ExpAA=0.28 First60=0.28 PredHel=0 Topology=o	0					SIG	16-17	23.101	5.22	21.343	5.1	RED_cys disintegrin |	1	salivary lipocalin	1E-115	gi|149898890	418	196	197	100	100	Triatoma infestans	Triabin	4E-005	sp|Q27049|TRIA_TRIPA	48.1	152	160	22	96	Triatoma pallidipennis	Triabin	3E-013	Bac_DnaA_C	0.55	Triabin	1E-012	Triabin 1e-012|	6	17	9
gi|270000362	gi|270000362	Adelphocoris lineolatus	Eukaryota; Metazoa; Arthropoda; Hexapoda; Insecta; Pterygota; Neoptera; Paraneoptera; Hemiptera; Euhemiptera; Heteroptera; Panheteroptera; Cimicomorpha; Miridae; Mirini; Adelphocoris.	M	M	138	odorant-binding protein 2	ExpAA=4.54 First60=4.53 PredHel=0 Topology=o	0					SIG	20-21	15.755	5.08	13.637	4.96	ECD_cys disintegrin |	1	odorant-binding protein 2	4E-077	gi|270000362	290	137	138	100	100	Adelphocoris lineolatus	Pheromone-binding protein-related protein 2	2E-005	sp|P54192|PBP2_DROME	48.1	114	150	24	77	Drosophila melanogaster	PBP_GOBP	2E-007	PhBP	1E-004	PBP_GOBP	9E-007	PBP_GOBP 9e-007| PhBP 0.008| PRK10429 | CAS_CSE1 | rpoC_TIGR | PRK07418 | Abhydrolase_2 | COG2159 | Paramyxo_P | PRK01109 |	242	1	272
gi|307095188	gi|307095188	Triatoma matogrossensis	Eukaryota; Metazoa; Arthropoda; Hexapoda; Insecta; Pterygota; Neoptera; Paraneoptera; Hemiptera; Euhemiptera; Heteroptera; Panheteroptera; Cimicomorpha; Reduviidae; Triatominae; Triatoma.	L	L	58	salivary kazaltype proteinase inhibitor	ExpAA=0.00 First60=0.00 PredHel=0 Topology=o	0					CYT		6.678	9.76			RGD_cys disintegrin |	1	salivary kazaltype proteinase inhibitor	1E-027	gi|307095188	126	57	58	100	100	Triatoma matogrossensis	Enhancer of split M1 protein	0.38	sp|O97176|ESM1_DROME	33.5	53	156	30	35	Drosophila melanogaster	AAA_7	4.8	KAZAL	0.42	cas1_YPEST	2.7	cas1_YPEST | Cas1_I-F |	5	20	27
gi|307095044	gi|307095044	Triatoma matogrossensis	Eukaryota; Metazoa; Arthropoda; Hexapoda; Insecta; Pterygota; Neoptera; Paraneoptera; Hemiptera; Euhemiptera; Heteroptera; Panheteroptera; Cimicomorpha; Reduviidae; Triatominae; Triatoma.	M	M	237	antigen5-like protein precursor	ExpAA=17.57 First60=17.56 PredHel=1 Topology=i5-27o	1	9.3	88.6	2.1		SIG	24-25	27.194	9.48	24.776	9.52	KGD_cys disintegrin |	1	antigen5-like protein precursor	1E-139	gi|307095044	498	236	237	100	100	Triatoma matogrossensis	Venom allergen 5	2E-022	sp|P86870|VA5_VESMG	106	165	202	37	82	Vespa magnifica	CAP	2E-009	SCP	1E-023	SCP_euk	5E-024	SCP_euk 5e-024| SCP 1e-021| SCP_CRISP 1e-013| SCP_GAPR-1_like 1e-013| SCP_GLIPR-1_like 6e-013| SCP_PRY1_like 2e-011| SCP_HrTT-1 6e-010| SCP 3e-009| CAP 9e-009| SCP_PR-1_like 7e-007|	11	5	39
gi|307095012	gi|307095012	Triatoma matogrossensis	Eukaryota; Metazoa; Arthropoda; Hexapoda; Insecta; Pterygota; Neoptera; Paraneoptera; Hemiptera; Euhemiptera; Heteroptera; Panheteroptera; Cimicomorpha; Reduviidae; Triatominae; Triatoma.	M	M	87	salivary kazaltype proteinase inhibitor	ExpAA=7.74 First60=7.74 PredHel=0 Topology=o	0					SIG	26-27	9.721	5.17	6.856	4.64	MLD_cys disintegrin |	1	salivary kazaltype proteinase inhibitor	3E-046	gi|307095012	188	86	87	100	100	Triatoma matogrossensis	Agrin	0.23	sp|O00468|AGRIN_HUMAN	34.3	551	2045	46	27	Homo sapiens	Kazal_2	0.31	KAZAL	0.002	KAZAL_FS	0.058	KAZAL_FS 0.058| KAZAL | oat | Kazal_2 | DUF3418 | caca | PRK07111 | KAZAL_PSTI | cas_HTH | PckA |	5	20	27
gi|307095008	gi|307095008	Triatoma matogrossensis	Eukaryota; Metazoa; Arthropoda; Hexapoda; Insecta; Pterygota; Neoptera; Paraneoptera; Hemiptera; Euhemiptera; Heteroptera; Panheteroptera; Cimicomorpha; Reduviidae; Triatominae; Triatoma.	M	M	87	salivary kazaltype proteinase inhibitor	ExpAA=7.12 First60=7.12 PredHel=0 Topology=o	0					SIG	26-27	9.832	5.31	6.98	4.93	MLD_cys disintegrin |	1	salivary kazaltype proteinase inhibitor	1E-045	gi|307095008	186	86	87	100	100	Triatoma matogrossensis	Enhancer of split M1 protein	0.009	sp|O97176|ESM1_DROME	38.9	131	156	28	85	Drosophila melanogaster	OATP	0.14	KAZAL	8E-004	KAZAL_FS	0.015	KAZAL_FS 0.015| KAZAL 0.085| OATP | Kazal_2 | oat | Kazal_1 | KAZAL_PSTI | PHA02825 | PTZ00303 | PRK07111 |	5	20	27
gi|307095000	gi|307095000	Triatoma matogrossensis	Eukaryota; Metazoa; Arthropoda; Hexapoda; Insecta; Pterygota; Neoptera; Paraneoptera; Hemiptera; Euhemiptera; Heteroptera; Panheteroptera; Cimicomorpha; Reduviidae; Triatominae; Triatoma.	M	M	87	salivary kazaltype proteinase inhibitor	ExpAA=10.71 First60=10.71 PredHel=0 Topology=o	0					SIG	26-27	9.769	5.7	6.902	4.86	MLD_cys disintegrin |	1	salivary kazaltype proteinase inhibitor	4E-046	gi|307095000	187	86	87	100	100	Triatoma matogrossensis	Tomoregulin-2	0.060	sp|Q9QYM9|TEFF2_MOUSE	36.2	46	374	41	13	Mus musculus	DUF2238	0.61	KAZAL	0.001	KAZAL_FS	0.044	KAZAL_FS 0.044| KAZAL | KAZAL_PSTI | PRK09185 | cas_HTH | oat | DUF2238 | COG3975 | Kazal_2 | PHA02825 |	5	20	27
gi|307094934	gi|307094934	Triatoma matogrossensis	Eukaryota; Metazoa; Arthropoda; Hexapoda; Insecta; Pterygota; Neoptera; Paraneoptera; Hemiptera; Euhemiptera; Heteroptera; Panheteroptera; Cimicomorpha; Reduviidae; Triatominae; Triatoma.	M	M	189	salivary lipocalin	ExpAA=10.24 First60=10.23 PredHel=0 Topology=o	0					SIG	20-21	21.419	8.79	19.326	8.66	KGD_cys disintegrin |	1	salivary lipocalin	1E-107	gi|307094934	391	188	189	100	100	Triatoma matogrossensis	Procalin	1E-008	sp|Q9U6R6|PRCLN_TRIPT	59.7	151	169	24	90	Triatoma protracta	Triabin	2E-013	YceI	0.55	Triabin	8E-013	Triabin 8e-013| Lipocalin | PRK06996 | Nitrophorin | LIM2_LIMK2 | PLPDE_III_yhfX_like | TonB-hemlactrns | PLN02966 | Reelin_repeat_2_subrepeat_2 |	6	17	9
gi|307094842	gi|307094842	Triatoma matogrossensis	Eukaryota; Metazoa; Arthropoda; Hexapoda; Insecta; Pterygota; Neoptera; Paraneoptera; Hemiptera; Euhemiptera; Heteroptera; Panheteroptera; Cimicomorpha; Reduviidae; Triatominae; Triatoma.	M	M	201	salivary lipocalin	ExpAA=0.44 First60=0.44 PredHel=0 Topology=o	0					SIG	18-19	22.826	9.06	20.919	8.96	VGD_cys disintegrin |	1	salivary lipocalin	1E-115	gi|307094842	418	200	201	100	100	Triatoma matogrossensis	Triabin	1E-009	sp|Q27049|TRIA_TRIPA	63.2	152	160	26	96	Triatoma pallidipennis	Triabin	8E-013	Sec7	0.66	Triabin	4E-012	Triabin 4e-012| Blc | Nitrophorin | RT_Rtv | Lipocalin | IL15 | Piwi_piwi-like_ProArk | PrmA | RT_G2_intron | DUF1080 |	6	17	9
gi|149898801	gi|149898801	Triatoma infestans	Eukaryota; Metazoa; Arthropoda; Hexapoda; Insecta; Pterygota; Neoptera; Paraneoptera; Hemiptera; Euhemiptera; Heteroptera; Panheteroptera; Cimicomorpha; Reduviidae; Triatominae; Triatoma.	M	M	182	salivary lipocalin	ExpAA=0.29 First60=0.29 PredHel=0 Topology=o	0					SIG	18-19	20.456	8.97	18.571	8.86	VGD_cys disintegrin |	1	salivary lipocalin	1E-103	gi|149898801	379	181	182	100	100	Triatoma infestans	Procalin	2E-010	sp|Q9U6R6|PRCLN_TRIPT	65.1	160	169	28	95	Triatoma protracta	Triabin	7E-019	FBG	2.6	Triabin	3E-018	Triabin 3e-018| Nitrophorin | Orbi_VP3 | PRK05761 | glmM | rbcL | Pox_polyA_pol_C |	6	17	9
gi|149898795	gi|149898795	Triatoma infestans	Eukaryota; Metazoa; Arthropoda; Hexapoda; Insecta; Pterygota; Neoptera; Paraneoptera; Hemiptera; Euhemiptera; Heteroptera; Panheteroptera; Cimicomorpha; Reduviidae; Triatominae; Triatoma.	M	M	182	salivary lipocalin	ExpAA=0.29 First60=0.29 PredHel=0 Topology=o	0					SIG	18-19	20.488	9.1	18.59	9	VGD_cys disintegrin |	1	salivary lipocalin	1E-104	gi|149898795	380	181	182	100	100	Triatoma infestans	Procalin	4E-012	sp|Q9U6R6|PRCLN_TRIPT	70.9	160	169	29	95	Triatoma protracta	Triabin	2E-017	PTBI	3.4	Triabin	8E-017	Triabin 8e-017| Nitrophorin | PRK12418 | MopB_Formate-Dh-H | rbcL |	6	17	9
gi|149898787	gi|149898787	Triatoma infestans	Eukaryota; Metazoa; Arthropoda; Hexapoda; Insecta; Pterygota; Neoptera; Paraneoptera; Hemiptera; Euhemiptera; Heteroptera; Panheteroptera; Cimicomorpha; Reduviidae; Triatominae; Triatoma.	M	M	182	salivary lipocalin	ExpAA=0.31 First60=0.31 PredHel=0 Topology=o	0					SIG	18-19	20.528	9.18	18.622	9.1	VGD_cys disintegrin |	1	salivary lipocalin	1E-103	gi|149898787	376	181	182	100	100	Triatoma infestans	Procalin	4E-010	sp|Q9U6R6|PRCLN_TRIPT	64.3	160	169	28	95	Triatoma protracta	Triabin	4E-017	PKS_KS	1.2	Triabin	2E-016	Triabin 2e-016| PRK05761 | rbcL |	6	17	9
gi|149898782	gi|149898782	Triatoma infestans	Eukaryota; Metazoa; Arthropoda; Hexapoda; Insecta; Pterygota; Neoptera; Paraneoptera; Hemiptera; Euhemiptera; Heteroptera; Panheteroptera; Cimicomorpha; Reduviidae; Triatominae; Triatoma.	M	M	182	salivary lipocalin	ExpAA=0.65 First60=0.65 PredHel=0 Topology=o	0					SIG	18-19	20.438	9.19	18.553	9.11	VGD_cys disintegrin |	1	salivary lipocalin	1E-105	gi|149898782	382	181	182	100	100	Triatoma infestans	Procalin	1E-012	sp|Q9U6R6|PRCLN_TRIPT	72.8	160	169	30	95	Triatoma protracta	Triabin	1E-019	PTBI	2.9	Triabin	6E-019	Triabin 6e-019| Nitrophorin 0.004| PRK05761 | Glycogen_syn | SpoVR | GT1_Glycogen_synthase_GSY2_like | fum_red_Fp | TagB |	6	17	9
gi|149689130	gi|149689130	Triatoma infestans	Eukaryota; Metazoa; Arthropoda; Hexapoda; Insecta; Pterygota; Neoptera; Paraneoptera; Hemiptera; Euhemiptera; Heteroptera; Panheteroptera; Cimicomorpha; Reduviidae; Triatominae; Triatoma.	M	M	162	salivary lipocalin	ExpAA=0.26 First60=0.26 PredHel=0 Topology=o	0					SIG	18-19	18.655	6.16	16.718	6.9	MLD_cys disintegrin |	1	salivary lipocalin	6E-093	gi|149689130	343	161	162	100	100	Triatoma infestans	Triabin	3E-037	sp|Q27049|TRIA_TRIPA	154	159	160	50	100	Triatoma pallidipennis	Triabin	3E-022	TR_FER	0.68	Triabin	1E-021	Triabin 1e-021| Mth212-like_AP-endo 0.087| PBP2_CbbR_RubisCO_like | CobN | PHA02695 | exoDNase_III |	6	17	9
gi|149689066	gi|149689066	Triatoma infestans	Eukaryota; Metazoa; Arthropoda; Hexapoda; Insecta; Pterygota; Neoptera; Paraneoptera; Hemiptera; Euhemiptera; Heteroptera; Panheteroptera; Cimicomorpha; Reduviidae; Triatominae; Triatoma.	M	M	206	salivary lipocalin	ExpAA=10.50 First60=9.70 PredHel=0 Topology=o	0					SIG	18-19	23.75	8.93	21.796	8.81	VGD_cys disintegrin |	1	salivary lipocalin	1E-118	gi|149689066	428	205	206	100	100	Triatoma infestans	Triabin	1E-010	sp|Q27049|TRIA_TRIPA	66.2	146	160	27	92	Triatoma pallidipennis	Triabin	2E-014	Alpha_adaptinC2	0.41	Triabin	1E-013	Triabin 1e-013| TonB-hemin | RhoGAP_fBEM3 | Lipocalin | DUF3852 | wcaI | PHA03136 | PRK14955 |	6	17	9
gi|270046248	gi|270046248	Triatoma dimidiata	Eukaryota; Metazoa; Arthropoda; Hexapoda; Insecta; Pterygota; Neoptera; Paraneoptera; Hemiptera; Euhemiptera; Heteroptera; Panheteroptera; Cimicomorpha; Reduviidae; Triatominae; Triatoma.	M	M	230	unnamed protein product	ExpAA=0.01 First60=0.01 PredHel=0 Topology=o	0					SIG	19-20	26.218	8.11	24.297	8.43	KGD_cys disintegrin |	1	unnamed protein product	1E-135	gi|270046248	484	229	230	100	100	Triatoma dimidiata	Venom allergen 5	1E-026	sp|P35787|VA5_VESVI	119	167	206	38	82	Vespula vidua	CAP	4E-014	SCP	8E-028	SCP_euk	4E-026	SCP_euk 4e-026| SCP 8e-026| SCP_CRISP 1e-017| SCP_HrTT-1 8e-017| SCP_GAPR-1_like 4e-016| SCP_PRY1_like 3e-015| SCP 4e-014| SCP_GLIPR-1_like 5e-014| CAP 2e-013| SCP_PR-1_like 8e-008|	11	5	39
gi|270046216	gi|270046216	Triatoma dimidiata	Eukaryota; Metazoa; Arthropoda; Hexapoda; Insecta; Pterygota; Neoptera; Paraneoptera; Hemiptera; Euhemiptera; Heteroptera; Panheteroptera; Cimicomorpha; Reduviidae; Triatominae; Triatoma.	M	M	241	unnamed protein product	ExpAA=8.66 First60=8.66 PredHel=0 Topology=o	0					SIG	25-26	27.523	9.08	25.022	8.99	KGD_cys disintegrin |	1	unnamed protein product	1E-142	gi|270046216	509	240	241	100	100	Triatoma dimidiata	Venom allergen 5	2E-029	sp|P86870|VA5_VESMG	129	165	202	40	82	Vespa magnifica	CAP	5E-014	SCP	6E-026	SCP_euk	9E-026	SCP_euk 9e-026| SCP 6e-024| SCP_CRISP 6e-017| SCP_HrTT-1 1e-016| SCP_PRY1_like 2e-015| SCP_GLIPR-1_like 4e-014| SCP 6e-014| SCP_GAPR-1_like 2e-013| CAP 3e-013| SCP_PR-1_like 4e-007|	11	5	39
gi|83637828	gi|83637828	Triatoma infestans	Eukaryota; Metazoa; Arthropoda; Hexapoda; Insecta; Pterygota; Neoptera; Paraneoptera; Hemiptera; Euhemiptera; Heteroptera; Panheteroptera; Cimicomorpha; Reduviidae; Triatominae; Triatoma.	M	M	409	infestin 1-7 precursor	ExpAA=0.00 First60=0.00 PredHel=0 Topology=o	0					SIG	17-18	45.004	5.45	43.258	5.39	ECD_cys disintegrin |	1	infestin 1-7 precursor	0.0	gi|83637828	902	408	409	100	100	Triatoma infestans	Serine protease inhibitor dipetalogastin (Fragment)	1E-160	sp|O96790|DPGN_DIPMA	565	339	351	75	97	Dipetalogaster maximus	Kazal_2	9E-007	KAZAL	1E-009	KAZAL	1E-007	KAZAL 1e-007| Kazal_2 5e-006| KAZAL_FS 5e-006| Kazal_1 2e-005| KAZAL_PSTI 3e-004| oat 0.022| OATP 0.100| KAZAL_SLC21 | quino_hemo_SAM | MopB_Phenylacetyl-CoA-OR |	5	20	8
gi|14211145	gi|14211145	Triatoma infestans	Eukaryota; Metazoa; Arthropoda; Hexapoda; Insecta; Pterygota; Neoptera; Paraneoptera; Hemiptera; Euhemiptera; Heteroptera; Panheteroptera; Cimicomorpha; Reduviidae; Triatominae; Triatoma.	L	L	222	thrombin inhibitor infestin precursor	ExpAA=0.00 First60=0.00 PredHel=0 Topology=o	0					CYT		24.399	5.86			ECD_cys disintegrin |	1	thrombin inhibitor infestin precursor	1E-138	gi|14211145	494	221	222	100	100	Triatoma infestans	Serine protease inhibitor dipetalogastin (Fragment)	1E-102	sp|O96790|DPGN_DIPMA	370	337	351	76	96	Dipetalogaster maximus	Kazal_2	7E-007	KAZAL	9E-010	KAZAL	9E-008	KAZAL 9e-008| KAZAL_FS 3e-006| Kazal_2 4e-006| Kazal_1 2e-005| KAZAL_PSTI 7e-004| oat 0.034| OATP 0.047| KAZAL_SLC21 | quino_hemo_SAM | MopB_Phenylacetyl-CoA-OR |	5	20	8
gi|115338587	gi|115338587	Triatoma infestans	Eukaryota; Metazoa; Arthropoda; Hexapoda; Insecta; Pterygota; Neoptera; Paraneoptera; Hemiptera; Euhemiptera; Heteroptera; Panheteroptera; Cimicomorpha; Reduviidae; Triatominae; Triatoma.	M	M	139	lysozyme 2	ExpAA=0.90 First60=0.90 PredHel=0 Topology=o	0					SIG	18-19	15.701	5.61	13.871	5.59	RGD_cys disintegrin |	1	lysozyme 2	3E-080	gi|115338587	301	138	139	100	100	Triatoma infestans	Lysozyme c-1	1E-033	sp|Q17005|LYSC1_ANOGA	141	135	140	45	97	Anopheles gambiae	Lys	2E-026	LYZ1	3E-031	LYZ1	2E-031	LYZ1 2e-031| LYZ1 2e-029| Lys 1e-025| PRK06164 | catalase_fungal | hopene_cyclase | Transglycosylas | KatE | catalase | katE |	243	1	273
gi|115392217	gi|115392217	Triatoma brasiliensis	Eukaryota; Metazoa; Arthropoda; Hexapoda; Insecta; Pterygota; Neoptera; Paraneoptera; Hemiptera; Euhemiptera; Heteroptera; Panheteroptera; Cimicomorpha; Reduviidae; Triatominae; Triatoma.	M	M	471	brasiliensin precursor	ExpAA=0.00 First60=0.00 PredHel=0 Topology=o	0					SIG	17-18	51.873	5.11	50.137	5.07	ECD_cys disintegrin |	1	brasiliensin precursor	0.0	gi|115392217	1039	470	471	100	100	Triatoma brasiliensis	Serine protease inhibitor dipetalogastin (Fragment)	1E-159	sp|O96790|DPGN_DIPMA	563	339	351	75	97	Dipetalogaster maximus	Kazal_2	9E-007	KAZAL	1E-009	KAZAL	1E-007	KAZAL 1e-007| Kazal_2 5e-006| KAZAL_FS 6e-006| Kazal_1 6e-006| KAZAL_PSTI 6e-004| oat 0.037| OATP | KAZAL_SLC21 | PRK07649 |	5	20	8
gi|155029178	gi|155029178	Triatoma infestans	Eukaryota; Metazoa; Arthropoda; Hexapoda; Insecta; Pterygota; Neoptera; Paraneoptera; Hemiptera; Euhemiptera; Heteroptera; Panheteroptera; Cimicomorpha; Reduviidae; Triatominae; Triatoma.	M	M	206	triafestin-2	ExpAA=10.89 First60=9.84 PredHel=0 Topology=o	0					SIG	18-19	23.752	8.93	21.77	8.81	VGD_cys disintegrin |	1	triafestin-2	1E-119	gi|155029178	429	205	206	100	100	Triatoma infestans	Triabin	3E-011	sp|Q27049|TRIA_TRIPA	68.6	146	160	30	92	Triatoma pallidipennis	Triabin	4E-012	ZnF_TTF	4.1	Triabin	2E-011	Triabin 2e-011| PRK10079 | RAG2 | COG4084 | PcnB | Lipocalin | DUF3852 | PTZ00435 | M3A_MIP | TonB-hemin |	6	17	9
gi|155029176	gi|155029176	Triatoma infestans	Eukaryota; Metazoa; Arthropoda; Hexapoda; Insecta; Pterygota; Neoptera; Paraneoptera; Hemiptera; Euhemiptera; Heteroptera; Panheteroptera; Cimicomorpha; Reduviidae; Triatominae; Triatoma.	M	M	206	triafestin-1	ExpAA=15.14 First60=13.61 PredHel=0 Topology=o	0					SIG	18-19	23.78	9.26	21.827	9.2	VGD_cys disintegrin |	1	triafestin-1	1E-118	gi|155029176	428	205	206	100	100	Triatoma infestans	Triabin	4E-010	sp|Q27049|TRIA_TRIPA	64.7	146	160	30	92	Triatoma pallidipennis	Triabin	4E-013	HTH_GNTR	0.38	Triabin	2E-012	Triabin 2e-012| PRK10079 | PRK14055 | addA_alphas | Orn_aminotrans | PRK10906 | COG3593 | TonB-hemin | DUF3852 | PTZ00435 |	6	17	9
gi|1567710	gi|1567710	Rhodnius prolixus	Eukaryota; Metazoa; Arthropoda; Hexapoda; Insecta; Pterygota; Neoptera; Paraneoptera; Hemiptera; Euhemiptera; Heteroptera; Panheteroptera; Cimicomorpha; Reduviidae; Triatominae; Rhodnius.	R	R	368	thrombin inhibitor protein	ExpAA=0.01 First60=0.01 PredHel=0 Topology=o	0					SIG	14-15	40.963	5.5	39.577	5.46	ECD_cys disintegrin |	1	Kazal-type inhibitor	4E-087	gi|295315536	326	409	412	48	100	Panstrongylus megistus	Serine protease inhibitor dipetalogastin (Fragment)	2E-078	sp|O96790|DPGN_DIPMA	292	337	351	45	96	Dipetalogaster maximus	Kazal_2	4E-006	KAZAL	8E-009	KAZAL	1E-006	KAZAL 1e-006| PRK10019 5e-006| KAZAL_FS 2e-005| Kazal_2 2e-005| Kazal_1 2e-004| KAZAL_PSTI 8e-004| SelP_N 0.001| PLN02304 0.001| znuA 0.003| Zip 0.004|	5	20	8
gi|1567704	gi|1567704	Rhodnius prolixus	Eukaryota; Metazoa; Arthropoda; Hexapoda; Insecta; Pterygota; Neoptera; Paraneoptera; Hemiptera; Euhemiptera; Heteroptera; Panheteroptera; Cimicomorpha; Reduviidae; Triatominae; Rhodnius.	K	K	129	thrombin inhibitor protein	ExpAA=0.00 First60=0.00 PredHel=0 Topology=o	0					CYT		14.461	4.64			ECD_cys disintegrin |	1	thrombin inhibitor infestin precursor	3E-030	gi|14211145	135	213	222	52	96	Triatoma infestans	Serine protease inhibitor dipetalogastin (Fragment)	1E-030	sp|O96790|DPGN_DIPMA	131	346	351	53	99	Dipetalogaster maximus	Kazal_2	4E-006	KAZAL	2E-008	KAZAL	2E-006	KAZAL 2e-006| Kazal_2 2e-005| KAZAL_FS 6e-005| Kazal_1 0.001| KAZAL_PSTI 0.002| OATP 0.040| oat | PLN00206 | PRK07119 | Astro_capsid |	5	20	8
gi|1567698	gi|1567698	Rhodnius prolixus	Eukaryota; Metazoa; Arthropoda; Hexapoda; Insecta; Pterygota; Neoptera; Paraneoptera; Hemiptera; Euhemiptera; Heteroptera; Panheteroptera; Cimicomorpha; Reduviidae; Triatominae; Rhodnius.	T	T	90	thrombin inhibitor protein	ExpAA=0.00 First60=0.00 PredHel=0 Topology=o	0					CYT		9.858	4.35			ECD_cys disintegrin |	1	Thrombin inhibitor rhodniin gi|1827578|pdb|1TBR|R Chain R, Crystal Structure Of	2E-037	gi|730939	158	86	103	86	84	Rhodnius prolixus	Thrombin inhibitor rhodniin	8E-039	sp|Q06684|THBI_RHOPR	158	86	103	86	84	Rhodnius prolixus	Kazal_2	3E-006	KAZAL	5E-009	KAZAL	5E-007	KAZAL 5e-007| Kazal_2 1e-005| KAZAL_FS 1e-004| KAZAL_PSTI 0.004| Kazal_1 0.005| OATP 0.011| PLN00206 0.074| oat | Astro_capsid | Glyco_transf_WecG_TagA |	5	20	8
Fleas
gi|121511894	gi|121511894	Xenopsylla cheopis	Eukaryota; Metazoa; Arthropoda; Hexapoda; Insecta; Pterygota; Neoptera; Endopterygota; Siphonaptera; Pulicidae; Xenopsyllinae; Xenopsylla.	M	M	104	putative secreted salivary protein	ExpAA=0.10 First60=0.10 PredHel=0 Topology=o	0					SIG	18-19	11.878	8.34	9.723	8.17	WGD_cys disintegrin |	1	putative secreted salivary protein	3E-059	gi|121511894	231	103	104	100	100	Xenopsylla cheopis	Salivary antigen 1	0.059	sp|Q94424|CTF1_CTEFE	36.2	164	176	27	94	Ctenocephalides felis	DUF477	0.43	SET	4.2	tig	0.72	tig | PRK13515 | ND4 | psbH | rSAM_paired_2 | PRK07121 | Trigger_N | recA |	1	142	5
gi|121511886	gi|121511886	Xenopsylla cheopis	Eukaryota; Metazoa; Arthropoda; Hexapoda; Insecta; Pterygota; Neoptera; Endopterygota; Siphonaptera; Pulicidae; Xenopsyllinae; Xenopsylla.	M	M	86	putative secreted salivary protein	ExpAA=16.30 First60=16.30 PredHel=0 Topology=o	0					SIG	19-20	9.433	6.52	7.243	5.69	VGD_cys disintegrin |	1	putative secreted salivary protein	1E-045	gi|121511886	186	85	86	100	100	Xenopsylla cheopis	Otolith matrix protein 1	4.3	sp|Q0VIL3|OTOMP_DANRE	30	72	371	32	20	Danio rerio	Pilin	1.4	SEA	0.87	PER1	0.016	PER1 0.016| DsrA | STKc_NDR_like | NOC3 | PLN03073 | STKc_NDR2 | Pilin | PRK10504 |	1	142	5
gi|121511972	gi|121511972	Xenopsylla cheopis	Eukaryota; Metazoa; Arthropoda; Hexapoda; Insecta; Pterygota; Neoptera; Endopterygota; Siphonaptera; Pulicidae; Xenopsyllinae; Xenopsylla.	M	M	100	CF salivary antigen 1 precursor-like protein	ExpAA=3.58 First60=3.58 PredHel=0 Topology=o	0					SIG	19-20	11.392	4.66	9.155	4.54	KTS_cys disintegrin |	1	CF salivary antigen 1 precursor-like protein	1E-055	gi|121511972	219	99	100	100	100	Xenopsylla cheopis	Salivary antigen 1	3E-005	sp|Q94424|CTF1_CTEFE	47	167	176	27	95	Ctenocephalides felis	Serinc	0.67	MA	1.6	ileS	0.43	ileS | Serinc | hsdM | PRK13461 | COG3141 | oat | Polyoma_lg_T_C | DUF1193 |	1	142	5
gi|262088891	gi|262088891	Ctenocephalides felis	Eukaryota; Metazoa; Arthropoda; Hexapoda; Insecta; Pterygota; Neoptera; Endopterygota; Siphonaptera; Pulicidae; Archaeopsyllinae; Ctenocephalides.	E	E	102	trypsin	ExpAA=0.00 First60=0.00 PredHel=0 Topology=o	0					CYT		10.985	5.22			KGD_cys disintegrin |	1	trypsin	8E-056	gi|262088891	219	101	102	100	100	Ctenocephalides felis	Plasma kallikrein	2E-013	sp|Q2KJ63|KLKB1_BOVIN	74.3	99	636	41	16	Bos taurus	Trypsin	1E-018	Tryp_SPc	9E-024	Tryp_SPc	9E-022	Tryp_SPc 9e-022| Tryp_SPc 1e-019| Trypsin 7e-018| COG5640 2e-006| APH 0.087| PRK06406 | CBS_pair_16 | PRK06556 | degP_htrA_DO | NrdJ_Z |	7	14	240
Flies - sole member from the Antigen 5 family
gi|302138844	gi|302138844	Tabanus yao	Eukaryota; Metazoa; Arthropoda; Hexapoda; Insecta; Pterygota; Neoptera; Endopterygota; Diptera; Brachycera; Tabanomorpha; Tabanidae; Tabanus.	M	M	255	tablysin 15	ExpAA=0.29 First60=0.29 PredHel=0 Topology=o	0					SIG		28.22	8.86			RGD_cys disintegrin |	1	tablysin 15	1E-149	gi|302138844	533	254	255	100	100	Tabanus yao	Venom allergen 3	9E-009	sp|P35778|VA3_SOLIN	60.8	227	234	26	97	Solenopsis invicta	CAP	0.034	SCP	2E-009	SCP_euk	5E-016	SCP_euk 5e-016| SCP 2e-007| COG3176 | SCP_GLIPR-1_like | CAP | SCP_HrTT-1 | SCP_CRISP | PRK07922 | quinone_pig3 | ALDH_SaliADH |	11	5	239
Ticks - Metastriate includes Kunitz, TIL, lipocalin and basic tail familes
gi|115063	gi|115063	Rhipicephalus microplus	Eukaryota; Metazoa; Arthropoda; Chelicerata; Arachnida; Acari; Parasitiformes; Ixodida; Ixodoidea; Ixodidae; Rhipicephalinae; Rhipicephalus; Boophilus.	M	M	650	Glycoprotein antigen BM86; AltName: Full=Protective antigen; Flags: Precursor	ExpAA=2.19 First60=0.05 PredHel=0 Topology=o	0					SIG	19-20	71.738	5.58	69.893	5.58	VGD_cys disintegrin |RTS_cys disintegrin |	2	Glycoprotein antigen BM86; AltName: Full=Protective antigen; Flags: Precursor	0.0	gi|115063	1398	649	650	100	100	synthetic construct	Glycoprotein antigen BM86	0.0	sp|P20736|BM86_BOOMI	1398	649	650	100	100	Boophilus microplus	DUF2764	0.32	RPOLA_N	2.8	Baculo_VP91_N	3.2	Baculo_VP91_N | vWA_Matrilin |	3	38	2
gi|219553156	gi|219553156	Rhipicephalus annulatus	Eukaryota; Metazoa; Arthropoda; Chelicerata; Arachnida; Acari; Parasitiformes; Ixodida; Ixodoidea; Ixodidae; Rhipicephalinae; Rhipicephalus; Boophilus.	M	M	648	Bm86-like protein	ExpAA=2.43 First60=0.04 PredHel=0 Topology=o	0					SIG	19-20	71.749	5.74	69.897	5.74	VGD_cys disintegrin |RTS_cys disintegrin |	2	Bm86-like protein	0.0	gi|219553156	1399	647	648	100	100	Rhipicephalus annulatus	Glycoprotein antigen BM86	0.0	sp|P20736|BM86_BOOMI	1319	649	650	94	100	Boophilus microplus	DUF2764	0.28	EGF_CA	0.71	vWA_Matrilin	0.29	vWA_Matrilin | DUF2764 | Baculo_VP91_N | cEGF | PTZ00270 |	3	38	2
gi|209418824	gi|209418824	Dermacentor reticulatus	Eukaryota; Metazoa; Arthropoda; Chelicerata; Arachnida; Acari; Parasitiformes; Ixodida; Ixodoidea; Ixodidae; Rhipicephalinae; Dermacentor.	M	M	168	complement inhibitor	ExpAA=0.01 First60=0.01 PredHel=0 Topology=o	0					SIG	18-19	18.625	4.55	16.726	4.55	MLD_cys disintegrin |	1	complement inhibitor	7E-094	gi|209418824	346	167	168	100	100	Dermacentor reticulatus	Moubatin	1E-039	sp|Q04669|MOUB_ORNMO	162	162	171	49	95	Ornithodoros moubata	CHRD	4.2	CBD_II	0.27	PRK01637	5.6	PRK01637 |	4	24	6
gi|253559376	gi|253559376	Hyalomma anatolicum anatolicum	Eukaryota; Metazoa; Arthropoda; Chelicerata; Arachnida; Acari; Parasitiformes; Ixodida; Ixodoidea; Ixodidae; Hyalomminae; Hyalomma.	M	M	664	HA03-2 protein variant	ExpAA=16.41 First60=14.71 PredHel=0 Topology=o	0					SIG	24-25	71.915	6.65	69.524	6.69	VGD_cys disintegrin |	1	HA03-2 protein variant	0.0	gi|253559376	1423	663	664	100	100	Hyalomma anatolicum anatolicum	Glycoprotein antigen BM86	0.0	sp|P20736|BM86_BOOMI	915	642	650	64	99	Boophilus microplus	ASC	0.31	Zn_dep_PLPC	1.8	gltX	0.29	gltX | PHA03295 | Clp_protease_NfeD_1 | ASC | FliC | cEGF | PHA03073 |	3	38	2
gi|74813139	gi|74813139	Rhipicephalus microplus	Eukaryota; Metazoa; Arthropoda; Chelicerata; Arachnida; Acari; Parasitiformes; Ixodida; Ixodoidea; Ixodidae; Rhipicephalinae; Rhipicephalus; Boophilus.	M	M	110	Antimicrobial peptide microplusin; Short=Microplusin; Flags: Precursor	ExpAA=1.31 First60=1.31 PredHel=0 Topology=o	0					SIG	20-21	12.187	5.34	10.22	5.16	KGD_cys disintegrin |	1	Antimicrobial peptide microplusin; Short=Microplusin; Flags: Precursor	8E-058	gi|74813139	226	109	110	100	100	Rhipicephalus microplus	Antimicrobial peptide microplusin	3E-059	sp|Q86LE5|MPSIN_BOOMI	226	109	110	100	100	Boophilus microplus	Usher	0.65	TLDc	0.79	RT_ZFREV_like	0.14	RT_ZFREV_like | PRK12389 | PRK15054 | TOS9 | PRK14844 | PRK13628 | Usher | PRK10959 | PRK10772 | dinG |	26	3	30
gi|281188144	gi|281188144	Rhipicephalus appendiculatus	Eukaryota; Metazoa; Arthropoda; Chelicerata; Arachnida; Acari; Parasitiformes; Ixodida; Ixodoidea; Ixodidae; Rhipicephalinae; Rhipicephalus; Rhipicephalus.	M	M	693	gut cell surface glycoprotein	ExpAA=13.26 First60=0.37 PredHel=0 Topology=o	0					SIG	19-20	76.102	6.09	74.244	5.99	VGD_cys disintegrin |KTS_cys disintegrin |	2	gut cell surface glycoprotein	0.0	gi|281188144	1483	692	693	100	100	Rhipicephalus appendiculatus	Glycoprotein antigen BM86	0.0	sp|P20736|BM86_BOOMI	1055	647	650	70	100	Boophilus microplus	DUF1229	0.020	DAGKa	5.9	vWA_Matrilin	0.019	vWA_Matrilin 0.019| DUF1229 | LCD1 | DUF2764 | VESA1_N |	3	38	2
gi|17154958	gi|17154958	Hyalomma anatolicum anatolicum	Eukaryota; Metazoa; Arthropoda; Chelicerata; Arachnida; Acari; Parasitiformes; Ixodida; Ixodoidea; Ixodidae; Hyalomminae; Hyalomma.	M	M	664	BM86-like protein	ExpAA=5.79 First60=4.12 PredHel=0 Topology=o	0					SIG	24-25	72.4	5.74	70.049	5.66	VGD_cys disintegrin |RED_cys disintegrin |	2	BM86-like protein	0.0	gi|17154958	1432	663	664	100	100	Hyalomma anatolicum anatolicum	Glycoprotein antigen BM86	0.0	sp|P20736|BM86_BOOMI	929	644	650	64	99	Boophilus microplus	His_Phos_2	0.006	Sema	0.64	His_Phos_2	0.033	His_Phos_2 0.033| gltX | Clp_protease_NfeD_1 | toxin_SdpC | vWA_Matrilin | ASC | cEGF | PHA03069 | Dynactin_p62 |	3	38	2
gi|306415515	gi|306415515	Rhipicephalus microplus	Eukaryota; Metazoa; Arthropoda; Chelicerata; Arachnida; Acari; Parasitiformes; Ixodida; Ixodoidea; Ixodidae; Rhipicephalinae; Rhipicephalus; Boophilus.	M	M	569	BM protein	ExpAA=0.10 First60=0.10 PredHel=0 Topology=o	0					SIG	19-20	63.606	6.27	61.71	6.28	VGD_cys disintegrin |RTS_cys disintegrin |	2	BM protein	0.0	gi|306415515	1243	568	569	100	100	Rhipicephalus microplus	Glycoprotein antigen BM86	0.0	sp|P20736|BM86_BOOMI	1203	600	650	97	92	Boophilus microplus	DUF2764	0.26	LCCL	3.2	DUF2764	1.4	DUF2764 | PRK05341 | vWA_Matrilin | Baculo_VP91_N |	3	38	2
gi|27466898	gi|27466898	Dermacentor andersoni	Eukaryota; Metazoa; Arthropoda; Chelicerata; Arachnida; Acari; Parasitiformes; Ixodida; Ixodoidea; Ixodidae; Rhipicephalinae; Dermacentor.	M	M	375	factor D-like protein	ExpAA=0.13 First60=0.13 PredHel=0 Topology=o	0					SIG	18-19	41.083	5.06	39.21	5.06	KGD_cys disintegrin |	1	factor D-like protein	0.0	gi|27466898	795	374	375	100	100	Dermacentor andersoni	Serine proteinase stubble	4E-045	sp|Q05319|STUB_DROME	182	254	787	35	32	Drosophila melanogaster	Trypsin	2E-044	Tryp_SPc	3E-064	Tryp_SPc	3E-062	Tryp_SPc 3e-062| Tryp_SPc 6e-059| Trypsin 1e-043| COG5640 1e-026| COG3591 | PTZ00303 | PRK15204 | Neogenin_C | MMS21 | WbaP_sugtrans |	7	14	10
gi|26420454	gi|26420454	Dermacentor variabilis	Eukaryota; Metazoa; Arthropoda; Chelicerata; Arachnida; Acari; Parasitiformes; Ixodida; Ixodoidea; Ixodidae; Rhipicephalinae; Dermacentor.	M	M	374	factor D-like protein	ExpAA=0.06 First60=0.05 PredHel=0 Topology=o	0					SIG	18-19	40.898	5.07	39.088	5.07	KGD_cys disintegrin |	1	factor D-like protein	0.0	gi|26420454	792	373	374	100	100	Dermacentor variabilis	Serine proteinase stubble	4E-045	sp|Q05319|STUB_DROME	182	257	787	35	33	Drosophila melanogaster	Trypsin	2E-044	Tryp_SPc	5E-064	Tryp_SPc	6E-062	Tryp_SPc 6e-062| Tryp_SPc 8e-059| Trypsin 1e-043| COG5640 5e-027| COG3591 | PRK15204 | PTZ00303 | Neogenin_C | WbaP_sugtrans |	7	14	10
gi|260908508	gi|260908508	Rhipicephalus sanguineus	Eukaryota; Metazoa; Arthropoda; Chelicerata; Arachnida; Acari; Parasitiformes; Ixodida; Ixodoidea; Ixodidae; Rhipicephalinae; Rhipicephalus; Rhipicephalus.	M	M	125	cytochrome c oxidase polypeptide Vb	ExpAA=0.00 First60=0.00 PredHel=0 Topology=o	0					BL	17-18	14.331	8.85	12.55	7.6	RGD_cys disintegrin |	1	cytochrome c oxidase polypeptide Vb	5E-071	gi|260908508	270	124	125	100	100	Rhipicephalus sanguineus	Cytochrome c oxidase subunit 5B, mitochondrial	6E-017	sp|P00428|COX5B_BOVIN	85.9	81	129	46	64	Bos taurus	COX5B	7E-015	AgrB	0.46	Cyt_c_Oxidase_V	5E-031	Cyt_c_Oxidase_Vb 5e-031| COX5B 3e-014| PLN02294 7e-009| CdsA | GT1_AviGT4_like | cdsA | PRK06188 | CTP_transf_1 | PTZ00043 | mal_quin_oxido |	15	4	17
gi|196476853	gi|196476853	Amblyomma americanum	Eukaryota; Metazoa; Arthropoda; Chelicerata; Arachnida; Acari; Parasitiformes; Ixodida; Ixodoidea; Ixodidae; Amblyomminae; Amblyomma.	M	M	156	putative secreted protein	ExpAA=1.40 First60=1.40 PredHel=0 Topology=o	0					SIG	18-19	18.005	9.32	16.078	9.38	KTS_cys disintegrin |	1	putative secreted protein	3E-092	gi|196476853	340	155	156	100	100	Amblyomma americanum	Tissue factor pathway inhibitor	0.010	sp|Q02445|TFPI1_RAT	39.3	235	302	36	78	Rattus norvegicus	Kunitz_BPTI	0.062	KU	4E-004	KU	0.040	KU 0.040| KU | Kunitz_BPTI | PRK15021 | PRK12843 | SMP_2 | 2A060602 | PHA02994 | PRK10692 | PRK11246 |	1	142	7
gi|194246039	gi|194246039	Dermacentor variabilis	Eukaryota; Metazoa; Arthropoda; Chelicerata; Arachnida; Acari; Parasitiformes; Ixodida; Ixodoidea; Ixodidae; Rhipicephalinae; Dermacentor.	M	M	214	putative Kunitz-BPTI protein	ExpAA=0.98 First60=0.97 PredHel=0 Topology=o	0					SIG	18-19	24.728	8.69	22.901	8.64	ECD_cys disintegrin |	1	putative Kunitz-BPTI protein	1E-133	gi|194246039	478	213	214	100	100	Dermacentor variabilis	Carboxypeptidase inhibitor SmCI	9E-014	sp|P84875|PCPI_SABMA	77	162	165	37	99	Sabellastarte magnifica	Kunitz_BPTI	4E-007	KU	8E-009	KU	8E-007	KU 8e-007| Kunitz_BPTI 2e-006| KU 5e-006| PRK10779 | PTZ00396 | PLN02877 | PDCD9 | DUF3447 | GDPD_GDE1 | scrB_fam |	1	142	11
gi|167613929	gi|167613929	Dermacentor andersoni	Eukaryota; Metazoa; Arthropoda; Chelicerata; Arachnida; Acari; Parasitiformes; Ixodida; Ixodoidea; Ixodidae; Rhipicephalinae; Dermacentor.	M	M	207	dathoxin-4	ExpAA=1.35 First60=1.34 PredHel=0 Topology=o	0					SIG	18-19	23.963	8.67	22.09	8.64	ECD_cys disintegrin |	1	dathoxin-4	1E-130	gi|167613929	466	206	207	100	100	Dermacentor andersoni	Papilin	2E-013	sp|O76840|PPN1_CAEEL	75.9	876	2167	30	40	Caenorhabditis elegans	Kunitz_BPTI	4E-007	KU	1E-008	KU	1E-006	KU 1e-006| Kunitz_BPTI 2e-006| KU 7e-006| PRK10779 | PTZ00396 | PLN02877 | PDCD9 | GDPD_GDE1 | DUF3447 | scrB_fam |	1	142	11
gi|301130834	gi|301130834	Rhipicephalus microplus	Eukaryota; Metazoa; Arthropoda; Chelicerata; Arachnida; Acari; Parasitiformes; Ixodida; Ixodoidea; Ixodidae; Rhipicephalinae; Rhipicephalus; Boophilus.	F	F	2727	papilin	ExpAA=0.03 First60=0.00 PredHel=0 Topology=o	0					CYT		295.839	5			RGD_cys disintegrin |KGD_cys disintegrin |	2	papilin	0.0	gi|301130834	6019	2726	2727	100	100	Rhipicephalus microplus	Papilin	0.0	sp|Q868Z9|PPN_DROME	1017	2797	2898	33	97	Drosophila melanogaster	ADAM_spacer1	1E-039	KU	2E-016	ADAM_spacer1	6E-039	ADAM_spacer1 6e-039| KU 4e-014| Kunitz_BPTI 4e-014| PLN02590 2e-013| KU 5e-013| I-set 7e-011| IG_like 1e-010| IG 1e-010| Ig2_FGFRL1-like 1e-008| IGc2 2e-008|	220	1	241
gi|325303786	gi|325303786	Amblyomma variegatum	Eukaryota; Metazoa; Arthropoda; Chelicerata; Arachnida; Acari; Parasitiformes; Ixodida; Ixodoidea; Ixodidae; Amblyomminae; Amblyomma.	M	M	187	secreted stromal cell-derived factor 2	ExpAA=21.78 First60=21.78 PredHel=1 Topology=i12-34o	1	11.8	81.8	6.4		SIG	28-29	20.621	6.34	17.525	6.12	RGD_cys disintegrin |	1	TPA_inf: secreted stromal cell-derived factor 2	1E-110	gi|325303786	399	186	187	100	100	Amblyomma variegatum	Stromal cell-derived factor 2-like protein 1	1E-053	sp|Q9ESP1|SDF2L_MOUSE	208	175	221	57	80	Mus musculus	MIR	5E-012	MIR	3E-006	PMT1	9E-017	PMT1 9e-017| MIR 2e-011| MIR 3e-004| COG1542 | PRK05690 | M20_like | PRK05590 | moeB | PRK08276 | RINT1_TIP1 |	6	17	243
gi|325303714	gi|325303714	Amblyomma variegatum	Eukaryota; Metazoa; Arthropoda; Chelicerata; Arachnida; Acari; Parasitiformes; Ixodida; Ixodoidea; Ixodidae; Amblyomminae; Amblyomma.	M	M	92	hypothetical secreted protein 316	ExpAA=4.02 First60=4.02 PredHel=0 Topology=o	0					SIG	27-28	10.186	11.04	7.414	11.35	KTS_cys disintegrin |	1	TPA_inf: hypothetical secreted protein 316	5E-047	gi|325303714	190	91	92	100	100	Amblyomma variegatum	Beta-bungarotoxin BF B2 chain	0.29	sp|B2KTG3|IVBI2_BUNFA	33.9	77	85	32	92	Bungarus fasciatus	DUF1646	0.81	MD	0.29	COG3521	1.0	COG3521 | PRK02710 | UhpB | PRK10814 |	36	2	244
gi|325303218	gi|325303218	Amblyomma variegatum	Eukaryota; Metazoa; Arthropoda; Chelicerata; Arachnida; Acari; Parasitiformes; Ixodida; Ixodoidea; Ixodidae; Amblyomminae; Amblyomma.	M	M	227	salivary mucin	ExpAA=20.68 First60=20.68 PredHel=1 Topology=i13-35o	1	9.7	84.6	5.7		SIG	29-30	23.888	4.26	20.941	4.15	RGD_cys disintegrin |	1	TPA_inf: salivary mucin	1E-124	gi|325303218	449	226	227	100	100	Amblyomma variegatum	Peritrophin-1	4E-012	sp|O76217|PE1_ANOGA	71.6	148	153	40	97	Anopheles gambiae	CBM_14	6E-012	ChtBD2	7E-015	ChtBD2	8E-013	ChtBD2 8e-013| CBM_14 3e-011| rne 4e-005| PHA03269 | PRK10431 | TRI5 | Tellurium_res | PRK06725 | VP7 | IlvB |	27	3	31
gi|325303216	gi|325303216	Amblyomma variegatum	Eukaryota; Metazoa; Arthropoda; Chelicerata; Arachnida; Acari; Parasitiformes; Ixodida; Ixodoidea; Ixodidae; Amblyomminae; Amblyomma.	M	M	246	peritrophin	ExpAA=20.69 First60=20.69 PredHel=1 Topology=i13-35o	1	8.9	85.8	5.3		SIG	29-30	25.878	4.31	22.953	4.2	RGD_cys disintegrin |	1	TPA_inf: peritrophin	1E-136	gi|325303216	488	245	246	100	100	Amblyomma variegatum	Peritrophin-1	5E-012	sp|O76217|PE1_ANOGA	71.6	148	153	40	97	Anopheles gambiae	CBM_14	3E-012	ChtBD2	3E-015	ChtBD2	4E-013	ChtBD2 4e-013| CBM_14 1e-011| rne 1e-004| PHA03269 | PRK06725 | TRI5 | PRK10808 | FRQ | PRK10431 | PTZ00182 |	27	3	31
gi|325303070	gi|325303070	Amblyomma variegatum	Eukaryota; Metazoa; Arthropoda; Chelicerata; Arachnida; Acari; Parasitiformes; Ixodida; Ixodoidea; Ixodidae; Amblyomminae; Amblyomma.	M	M	229	serine proteinase inhibitor	ExpAA=0.02 First60=0.02 PredHel=0 Topology=o	0					SIG	21-22	26.719	8	24.609	7.84	KTS_cys disintegrin |	1	TPA_inf: serine proteinase inhibitor	1E-143	gi|325303070	510	228	229	100	100	Amblyomma variegatum	Papilin	1E-014	sp|Q868Z9|PPN_DROME	80.1	765	2898	28	26	Drosophila melanogaster	Kunitz_BPTI	6E-004	KU	1E-006	KU	1E-004	KU 1e-004| KU 0.001| Kunitz_BPTI 0.003| PLN02807 | COG5270 | PTZ00477 | PRK00783 |	1	142	11
gi|325303018	gi|325303018	Amblyomma variegatum	Eukaryota; Metazoa; Arthropoda; Chelicerata; Arachnida; Acari; Parasitiformes; Ixodida; Ixodoidea; Ixodidae; Amblyomminae; Amblyomma.	L	L	230	nucleotide binding protein 2	ExpAA=0.25 First60=0.24 PredHel=0 Topology=o	0					BL	34-35	24.739	5.97	21.43	5.47	MLD_cys disintegrin |	1	TPA_inf: nucleotide binding protein 2	1E-131	gi|325303018	471	229	230	100	100	Amblyomma variegatum	Cytosolic Fe-S cluster assembly factor NUBP2	9E-095	sp|Q68FS1|NUBP2_RAT	346	229	271	67	85	Rattus norvegicus	ParA	6E-034	AAA	0.009	MRP-like	2E-068	MRP-like 2e-068| Mrp 9e-053| PRK11670 3e-049| ParA 3e-033| COG0455 5e-015| MinD 8e-015| CbiA 2e-014| ArsA 2e-012| COG1149 3e-012| minD_arch 4e-012|	222	1	245
gi|325303000	gi|325303000	Amblyomma variegatum	Eukaryota; Metazoa; Arthropoda; Chelicerata; Arachnida; Acari; Parasitiformes; Ixodida; Ixodoidea; Ixodidae; Amblyomminae; Amblyomma.	S	S	198	C2H2-type Zn-finger protein	ExpAA=0.00 First60=0.00 PredHel=0 Topology=o	0					CYT		21.237	9.37			KTS_cys disintegrin |	1	TPA_inf: C2H2-type Zn-finger protein	1E-116	gi|325303000	422	197	198	100	100	Amblyomma variegatum	Zinc finger protein 764	1E-029	sp|Q96H86|ZN764_HUMAN	129	231	408	48	57	Homo sapiens	zf-C2H2	0.015	ZnF_C2H2	5E-004	PRK12323	6E-004	PRK12323 6e-004| COG5048 0.004| kgd 0.025| PLN02983 0.034| COG5236 0.038| ZnF_C2H2 0.052| PDHac_trf_long 0.056| PRK10856 0.069| SFP1 0.071| zf-C2H2 0.074|	12	5	14
gi|325302966	gi|325302966	Amblyomma variegatum	Eukaryota; Metazoa; Arthropoda; Chelicerata; Arachnida; Acari; Parasitiformes; Ixodida; Ixodoidea; Ixodidae; Amblyomminae; Amblyomma.	D	D	388	glycine dehydrogenase	ExpAA=0.61 First60=0.00 PredHel=0 Topology=o	0					CYT		42.972	6.11			KGD_cys disintegrin |	1	TPA_inf: glycine dehydrogenase	0.0	gi|325302966	781	387	388	100	100	Amblyomma variegatum	Glycine dehydrogenase	1E-146	sp|Q91W43|GCSP_MOUSE	519	561	1025	65	55	Mus musculus	GDC-P	1E-118	Aamy	0.15	PRK05367	0.0	PRK05367 | PLN02414 e-162| gcvP e-134| PRK12566 e-125| GDC-P e-117| GcvP 3e-094| GDC-P 1e-089| PRK00451 3e-064| GcvP 1e-032| PRK04366 2e-014|	223	1	246
gi|325302958	gi|325302958	Amblyomma variegatum	Eukaryota; Metazoa; Arthropoda; Chelicerata; Arachnida; Acari; Parasitiformes; Ixodida; Ixodoidea; Ixodidae; Amblyomminae; Amblyomma.	Y	Y	205	asparaginase	ExpAA=0.00 First60=0.00 PredHel=0 Topology=o	0					CYT		22.321	9.18			RTS_cys disintegrin |	1	TPA_inf: asparaginase	1E-117	gi|325302958	424	204	205	100	100	Amblyomma variegatum	N(4)-(Beta-N-acetylglucosaminyl)-L-asparaginase (Fragment)	3E-064	sp|O02467|ASPG_SPOFR	244	204	320	59	64	Spodoptera frugiperda	Asparaginase_2	3E-050	ZnF_TAZ	0.81	Glycosylasparag	8E-060	Glycosylasparaginase 8e-060| Asparaginase_2 1e-049| COG1446 3e-031| ASRGL1_like 3e-021| PLN02689 5e-021| Ntn_Asparaginase_2_like 2e-020| Asparaginase_2 7e-019| PRK10226 7e-018| Asparaginase_2_like 9e-013| PLN02937 2e-009|	224	1	247
gi|325302834	gi|325302834	Amblyomma variegatum	Eukaryota; Metazoa; Arthropoda; Chelicerata; Arachnida; Acari; Parasitiformes; Ixodida; Ixodoidea; Ixodidae; Amblyomminae; Amblyomma.	V	V	176	trypsin-like serine protease	ExpAA=0.01 First60=0.00 PredHel=0 Topology=o	0					CYT		19.639	6.08			KGD_cys disintegrin |	1	TPA_inf: trypsin-like serine protease	1E-104	gi|325302834	379	175	176	100	100	Amblyomma variegatum	Serine proteinase stubble	2E-033	sp|Q05319|STUB_DROME	141	147	787	43	19	Drosophila melanogaster	Trypsin	2E-031	Tryp_SPc	7E-047	Tryp_SPc	7E-045	Tryp_SPc 7e-045| Tryp_SPc 9e-043| Trypsin 8e-031| COG5640 2e-013| PTZ00303 | IFRD | DUF1986 | PRK00979 | Aminotran_5 | PRK02362 |	7	14	10
gi|325302736	gi|325302736	Amblyomma variegatum	Eukaryota; Metazoa; Arthropoda; Chelicerata; Arachnida; Acari; Parasitiformes; Ixodida; Ixodoidea; Ixodidae; Amblyomminae; Amblyomma.	M	M	177	serine proteinase inhibitor	ExpAA=0.01 First60=0.01 PredHel=0 Topology=o	0					SIG	18-19	19.53	7.51	17.693	7.99	KTS_cys disintegrin |	1	TPA: serine proteinase inhibitor	1E-107	gi|325302736	390	176	177	100	100	Amblyomma variegatum	Carboxypeptidase inhibitor SmCI	3E-013	sp|P84875|PCPI_SABMA	74.7	161	165	35	98	Sabellastarte magnifica	Kunitz_BPTI	2E-011	KU	7E-012	Kunitz_BPTI	8E-011	Kunitz_BPTI 8e-011| KU 6e-010| KU 6e-010| PRK09169 | PHA03332 | deg-1 | COG3341 | PBP1_GC_C_enterotoxin_receptor |	1	142	11
gi|325302602	gi|325302602	Amblyomma variegatum	Eukaryota; Metazoa; Arthropoda; Chelicerata; Arachnida; Acari; Parasitiformes; Ixodida; Ixodoidea; Ixodidae; Amblyomminae; Amblyomma.	M	M	205	hypothetical secreted protein 204	ExpAA=0.04 First60=0.04 PredHel=0 Topology=o	0					SIG	18-19	23.493	9.2	21.486	9.24	KGD_cys disintegrin |	1	TPA_inf: hypothetical secreted protein 204	1E-130	gi|325302602	466	204	205	100	100	Amblyomma variegatum	Zonadhesin	7E-010	sp|O88799|ZAN_MOUSE	63.9	4022	5376	31	75	Mus musculus	TIL	1E-005	VPS10	0.074	TIL	7E-005	TIL 7e-005| PRK12831 | PLN03024 |	1	142	4
gi|215275255	gi|215275255	Rhipicephalus sanguineus	Eukaryota; Metazoa; Arthropoda; Chelicerata; Arachnida; Acari; Parasitiformes; Ixodida; Ixodoidea; Ixodidae; Rhipicephalinae; Rhipicephalus; Rhipicephalus.	M	M	86	Evasin-3; Flags: Precursor	ExpAA=0.02 First60=0.02 PredHel=0 Topology=o	0					SIG	20-21	9.156	8.21	7.014	6.73	RTS_cys disintegrin |	1	Evasin-3; Flags: Precursor	3E-044	gi|215275255	181	85	86	100	100		Evasin-3	1E-045	sp|P0C8E8|EVA3_RHISA	181	85	86	100	100	Rhipicephalus sanguineus	RhgB_N	2.7	PIPKc	0.40	PRK07049	0.16	PRK07049 | 34 |	36	2	248
gi|281188148	gi|281188148	Rhipicephalus appendiculatus	Eukaryota; Metazoa; Arthropoda; Chelicerata; Arachnida; Acari; Parasitiformes; Ixodida; Ixodoidea; Ixodidae; Rhipicephalinae; Rhipicephalus; Rhipicephalus.	M	M	654	gut cell surface glycoprotein	ExpAA=7.14 First60=0.20 PredHel=0 Topology=o	0					SIG	19-20	71.83	5.91	69.936	5.91	VGD_cys disintegrin |RTS_cys disintegrin |	2	gut cell surface glycoprotein	0.0	gi|281188148	1404	653	654	100	100	Rhipicephalus appendiculatus	Glycoprotein antigen BM86	0.0	sp|P20736|BM86_BOOMI	1023	647	650	73	100	Boophilus microplus	Sporozoite_P67	0.001	POLBc	0.24	Sporozoite_P67	0.006	Sporozoite_P67 0.006| gltX | vWA_Matrilin |	3	38	2
gi|312838493	gi|312838493	Hyalomma marginatum marginatum	Eukaryota; Metazoa; Arthropoda; Chelicerata; Arachnida; Acari; Parasitiformes; Ixodida; Ixodoidea; Ixodidae; Hyalomminae; Hyalomma.	M	M	664	Hm86 protein	ExpAA=19.24 First60=19.03 PredHel=1 Topology=i5-24o	1	2.9	96.4	0.8		SIG	24-25	72.285	5.96	69.927	5.96	VGD_cys disintegrin |	1	Hm86 protein	0.0	gi|312838493	1427	663	664	100	100	Hyalomma marginatum marginatum	Glycoprotein antigen BM86	0.0	sp|P20736|BM86_BOOMI	920	643	650	65	99	Boophilus microplus	ASC	0.85	Sema	0.93	gltX	0.37	gltX | PRK09709 | ASC | cEGF | PHA03069 |	3	38	2
gi|312838491	gi|312838491	Dermacentor reticulatus	Eukaryota; Metazoa; Arthropoda; Chelicerata; Arachnida; Acari; Parasitiformes; Ixodida; Ixodoidea; Ixodidae; Rhipicephalinae; Dermacentor.	M	M	664	Dr86 protein	ExpAA=0.31 First60=0.12 PredHel=0 Topology=o	0					SIG	19-20	73.336	5.96	71.469	5.85	KTS_cys disintegrin |	1	Dr86 protein	0.0	gi|312838491	1420	663	664	100	100	Dermacentor reticulatus	Glycoprotein antigen BM86	0.0	sp|P20736|BM86_BOOMI	728	647	650	53	100	Boophilus microplus	VESA1_N	0.061	STI	0.94	VESA1_N	0.34	VESA1_N | OM_YfiO | OATP | vWA_Matrilin |	3	38	2
gi|312838489	gi|312838489	Rhipicephalus evertsi evertsi	Eukaryota; Metazoa; Arthropoda; Chelicerata; Arachnida; Acari; Parasitiformes; Ixodida; Ixodoidea; Ixodidae; Rhipicephalinae; Rhipicephalus; Rhipicephalus.	M	M	680	Ree86 protein	ExpAA=12.67 First60=2.79 PredHel=0 Topology=o	0					BL	44-45	75.171	6.29	70.128	6.02	RTS_cys disintegrin |	1	Ree86 protein	0.0	gi|312838489	1461	679	680	100	100	Rhipicephalus evertsi evertsi	Glycoprotein antigen BM86	0.0	sp|P20736|BM86_BOOMI	1187	648	650	84	100	Boophilus microplus	Spheroidin	0.17	EGF_CA	0.31	vWA_Matrilin	0.083	vWA_Matrilin 0.083| Spheroidin | cEGF | EGF_CA |	3	38	2
gi|312838485	gi|312838485	Haemaphysalis elliptica	Eukaryota; Metazoa; Arthropoda; Chelicerata; Arachnida; Acari; Parasitiformes; Ixodida; Ixodoidea; Ixodidae; Haemaphysalinae; Haemaphysalis.	M	M	597	ATAQ protein	ExpAA=2.74 First60=0.84 PredHel=0 Topology=o	0					SIG	19-20	65.658	5.47	63.682	5.47	RED_cys disintegrin |	1	ATAQ protein	0.0	gi|312838485	1282	596	597	100	100	Haemaphysalis elliptica	Glycoprotein antigen BM86	5E-034	sp|P20736|BM86_BOOMI	146	614	650	23	95	Boophilus microplus	RAP1	0.040	Amelin	5.0	RAP1	0.22	RAP1 | Sporozoite_P67 | Metaviral_G | PRK10672 | rad23 | Trypan_PARP | PHA03291 | TFIIF_alpha | PRK14950 | PHA03270 |	3	38	2
gi|261278551	gi|261278551	Rhipicephalus microplus	Eukaryota; Metazoa; Arthropoda; Chelicerata; Arachnida; Acari; Parasitiformes; Ixodida; Ixodoidea; Ixodidae; Rhipicephalinae; Rhipicephalus; Boophilus.	H	H	90	Chain A, Nmr Structure Of Microplusin A Antimicrobial Peptide From Rhipicephalus (Boophilus) Microplus	ExpAA=0.00 First60=0.00 PredHel=0 Topology=o	0					CYT		10.22	5.16			KGD_cys disintegrin |	1	Chain A, Nmr Structure Of Microplusin A Antimicrobial Peptide From Rhipicephalus	6E-048	gi|261278551	193	89	90	100	100		Antimicrobial peptide microplusin	2E-049	sp|Q86LE5|MPSIN_BOOMI	193	89	110	100	82	Boophilus microplus	Usher	0.60	TLDc	0.73	PRK12389	0.22	PRK12389 | RT_ZFREV_like | PRK15054 | TOS9 | PRK14844 | Usher | PRK04870 | PHA03246 | dinG |	26	3	30
gi|307933356	gi|307933356	Haemaphysalis longicornis	Eukaryota; Metazoa; Arthropoda; Chelicerata; Arachnida; Acari; Parasitiformes; Ixodida; Ixodoidea; Ixodidae; Haemaphysalinae; Haemaphysalis.	M	M	1694	Vitellogenin-1	ExpAA=5.05 First60=5.05 PredHel=0 Topology=o	0					SIG	22-23	197	6.03	194.893	6	RED_cys disintegrin |	1	Vitellogenin-1	0.0	gi|307933356	3514	1693	1694	100	100	Haemaphysalis longicornis	Vitellogenin-6	2E-049	sp|Q94637|VIT6_OSCBR	199	1524	1660	20	92	Oscheius brevesophaga	Vitellogenin_N	2E-072	LPD_N	2E-069	Vitellogenin_N	1E-071	Vitellogenin_N 1e-071| LPD_N 3e-067| DUF1943 2e-022| VWD 2e-010| VWD 3e-010| PLN03244 0.031| Borrelia_orfA | PLN02960 | PRK14335 | PHA03356 |	228	1	252
gi|307006447	gi|307006447	Hyalomma marginatum rufipes	Eukaryota; Metazoa; Arthropoda; Chelicerata; Arachnida; Acari; Parasitiformes; Ixodida; Ixodoidea; Ixodidae; Hyalomminae; Hyalomma.	M	M	154	hypothetical secreted protein of the basic tail family	ExpAA=0.01 First60=0.01 PredHel=0 Topology=o	0					SIG	16-17	16.692	9.31	15.023	9.38	RGD_cys disintegrin |	1	hypothetical secreted protein of the basic tail family	1E-089	gi|307006447	332	153	154	100	100	Hyalomma marginatum rufipes	Histone H1B	0.002	sp|P40276|H1B_CHITE	41.2	145	232	44	63	Chironomus tentans	TSGP1	0.001	PTBI	0.92	rplD	0.001	rplD 0.001| PRK13808 0.002| TSGP1 0.004| PTZ00144 0.008| PRK06319 0.012| PRK07561 0.015| PRK14552 0.026| PRK10905 0.033| CDC27 0.048| RNase_H2-Ydr279 0.062|	37	2	253
gi|307006495	gi|307006495	Hyalomma marginatum rufipes	Eukaryota; Metazoa; Arthropoda; Chelicerata; Arachnida; Acari; Parasitiformes; Ixodida; Ixodoidea; Ixodidae; Hyalomminae; Hyalomma.	M	M	219	lipocalin group IV subgroup metastriate	ExpAA=0.12 First60=0.12 PredHel=0 Topology=o	0					SIG	17-18	25.038	4.61	23.264	4.55	RGD_cys disintegrin |	1	lipocalin group IV subgroup metastriate	1E-127	gi|307006495	456	218	219	100	100	Hyalomma marginatum rufipes	Membrane-bound lytic murein transglycosylase F	1.5	sp|Q30PQ0|MLTF_SULDN	33.1	81	467	26	18	Sulfurimonas denitrificans (strain ATCC 33889 / DSM 1251)	His_binding	0.012	CAP10	0.24	His_binding	0.058	His_binding 0.058| nfrB | PRK05580 | VapI | cas_Cas5t | Trep_dent_lipo | PRK14716 | HAD-1A3-hyp | truB |	28	3	41
gi|307006469	gi|307006469	Hyalomma marginatum rufipes	Eukaryota; Metazoa; Arthropoda; Chelicerata; Arachnida; Acari; Parasitiformes; Ixodida; Ixodoidea; Ixodidae; Hyalomminae; Hyalomma.	M	M	233	lipocalin group II group II b	ExpAA=0.11 First60=0.11 PredHel=0 Topology=o	0					SIG	17-18	26.561	4.53	24.796	4.48	RGD_cys disintegrin |	1	lipocalin group II group II b	1E-134	gi|307006469	481	232	233	100	100	Hyalomma marginatum rufipes	Membrane-bound lytic murein transglycosylase F	0.56	sp|Q30PQ0|MLTF_SULDN	34.7	81	467	26	18	Sulfurimonas denitrificans (strain ATCC 33889 / DSM 1251)	His_binding	0.019	MCM	0.57	His_binding	0.097	His_binding 0.097| nfrB | PRK05580 | TruD | VapI | PRK14716 | HAD-1A3-hyp | Trep_dent_lipo | PRK13434 |	28	3	41
gi|18958004	gi|18958004	Rhipicephalus appendiculatus	Eukaryota; Metazoa; Arthropoda; Chelicerata; Arachnida; Acari; Parasitiformes; Ixodida; Ixodoidea; Ixodidae; Rhipicephalinae; Rhipicephalus; Rhipicephalus.	M	M	461	midgut serine proteinase-3	ExpAA=1.08 First60=0.18 PredHel=0 Topology=o	0					SIG	15-16	49.6	8.26	48.118	8.13	ECD_cys disintegrin |	1	midgut serine proteinase-3	0.0	gi|18958004	947	460	461	100	100	Rhipicephalus appendiculatus	Atrial natriuretic peptide-converting enzyme	4E-030	sp|Q9Z319|CORIN_MOUSE	132	771	1113	35	69	Mus musculus	Trypsin	8E-036	Tryp_SPc	6E-046	Tryp_SPc	7E-044	Tryp_SPc 7e-044| Tryp_SPc 8e-044| Trypsin 5e-035| CUB 6e-013| CUB 2e-011| CUB 8e-010| LDLa 8e-009| Ldl_recept_a 9e-008| LDLa 2e-007| COG5640 1e-006|	229	1	254
gi|18958000	gi|18958000	Rhipicephalus appendiculatus	Eukaryota; Metazoa; Arthropoda; Chelicerata; Arachnida; Acari; Parasitiformes; Ixodida; Ixodoidea; Ixodidae; Rhipicephalinae; Rhipicephalus; Rhipicephalus.	M	M	298	midgut serine proteinase-1	ExpAA=1.72 First60=1.72 PredHel=0 Topology=o	0					SIG	22-23	32.332	5.12	30.22	5.13	KGD_cys disintegrin |	1	midgut serine proteinase-1	1E-180	gi|18958000	635	297	298	100	100	Rhipicephalus appendiculatus	Chymotrypsinogen A	1E-030	sp|P00766|CTRA_BOVIN	133	244	245	32	100	Bos taurus	Trypsin	7E-036	Tryp_SPc	3E-048	Tryp_SPc	3E-047	Tryp_SPc 3e-047| Tryp_SPc 3e-046| Trypsin 4e-035| COG5640 3e-009| DUF1986 2e-004| COG3591 0.013| DUF316 0.067| MdoG | COG1204 | COG2033 |	7	14	10
gi|3913368	gi|3913368	Rhipicephalus microplus	Eukaryota; Metazoa; Arthropoda; Chelicerata; Arachnida; Acari; Parasitiformes; Ixodida; Ixodoidea; Ixodidae; Rhipicephalinae; Rhipicephalus; Boophilus.	A	A	69	Protease inhibitor carrapatin	ExpAA=0.33 First60=0.33 PredHel=0 Topology=o	0					CYT		7.861	4.34			ECD_cys disintegrin |	1	Protease inhibitor carrapatin	3E-038	gi|3913368	161	68	69	100	100		Protease inhibitor carrapatin	1E-039	sp|P81162|CRPTI_BOOMI	161	68	69	100	100	Boophilus microplus	Kunitz_BPTI	1E-015	KU	1E-015	Kunitz_BPTI	7E-015	Kunitz_BPTI 7e-015| KU 2e-013| KU 3e-012| GH43_6 | proteasome_beta_type_6 | M1_TAF2 | SCA7 |	1	142	5
gi|28932710	gi|28932710	Rhipicephalus appendiculatus	Eukaryota; Metazoa; Arthropoda; Chelicerata; Arachnida; Acari; Parasitiformes; Ixodida; Ixodoidea; Ixodidae; Rhipicephalinae; Rhipicephalus; Rhipicephalus.	M	M	195	20/24 kDa immunodominant saliva protein	ExpAA=34.70 First60=34.69 PredHel=1 Topology=i7-29o	1	11.3	85.1	3.6		SIG	19-20	19.724	9.41	17.844	9.4	RTS_cys disintegrin |	1	20/24 kDa immunodominant saliva protein	1E-113	gi|28932710	412	194	195	100	100	Rhipicephalus appendiculatus	WAS/WASL-interacting protein family member 1	2E-004	sp|Q8K1I7|WIPF1_MOUSE	45.4	274	493	32	56	Mus musculus	Herpes_U47	0.019	Alpha_TIF	1.6	PLN02217	0.002	PLN02217 0.002| Herpes_U47 0.094| Prox1 | DEC-1_N | PRK14276 | PRK14965 | PHA03247 | BioY | Pneumo_att_G | Herpes_BLLF1 |	29	3	255
gi|22770986	gi|22770986	Rhipicephalus microplus	Eukaryota; Metazoa; Arthropoda; Chelicerata; Arachnida; Acari; Parasitiformes; Ixodida; Ixodoidea; Ixodidae; Rhipicephalinae; Rhipicephalus; Boophilus.	M	M	2428	notch-like protein	ExpAA=45.88 First60=22.28 PredHel=1 Topology=i7-29o	1	0.9	98.8	0.3		SIG	27-28	260.952	5.05	258.273	5.02	RTS_cys disintegrin |ECD_cys disintegrin |	2	notch-like protein	0.0	gi|22770986	5321	2427	2428	100	100	Rhipicephalus microplus	Neurogenic locus Notch protein	0.0	sp|P07207|NOTCH_DROME	2779	2650	2703	53	98	Drosophila melanogaster	NOD	3E-023	EGF_CA	6E-008	ANK	5E-024	ANK 5e-024| NOD 2e-022| DUF3454 5e-022| PHA03100 3e-017| PHA02875 6e-016| Ank_2 3e-015| NODP 2e-014| Arp 3e-014| PHA03095 5e-014| PAT1 1e-013|	30	3	32
gi|37787184	gi|37787184	Dermacentor variabilis	Eukaryota; Metazoa; Arthropoda; Chelicerata; Arachnida; Acari; Parasitiformes; Ixodida; Ixodoidea; Ixodidae; Rhipicephalinae; Dermacentor.	M	M	596	acetylcholinesterase	ExpAA=13.22 First60=13.18 PredHel=0 Topology=o	0					BL	35-36	65.64	4.63	61.985	4.68	RED_cys disintegrin |	1	acetylcholinesterase	0.0	gi|37787184	1226	595	596	100	100	Dermacentor variabilis	Acetylcholinesterase	1E-144	sp|Q869C3|ACES_ANOGA	511	543	737	49	74	Anopheles gambiae	COesterase	1E-166	MeTrc	0.71	COesterase	1E-166	COesterase e-166| Esterase_lipase e-124| PnbA 1e-082| Abhydrolase_3 3e-012| Aes 6e-012| Esterase 4e-004| PRK10162 0.017| Fes 0.069| Abhydrolase_5 0.086| Abhydrolase_6 |	9	7	12
gi|260908632	gi|260908632	Rhipicephalus sanguineus	Eukaryota; Metazoa; Arthropoda; Chelicerata; Arachnida; Acari; Parasitiformes; Ixodida; Ixodoidea; Ixodidae; Rhipicephalinae; Rhipicephalus; Rhipicephalus.	K	K	122	serine proteinase inhibitor	ExpAA=0.00 First60=0.00 PredHel=0 Topology=o	0					CYT		14.08	9.18			KTS_cys disintegrin |	1	serine proteinase inhibitor	5E-070	gi|260908632	266	121	122	100	100	Rhipicephalus sanguineus	Protein AMBP	1E-009	sp|Q62577|AMBP_MERUN	62	99	346	33	29	Meriones unguiculatus	Kunitz_BPTI	4E-007	KU	3E-007	Kunitz_BPTI	2E-006	Kunitz_BPTI 2e-006| KU 2e-005| KU 9e-005| PLN02427 0.021| PRK15314 0.078| PRK14901 | Hamartin | Ube1 | PRK03705 | PLN02281 |	1	142	7
gi|260908574	gi|260908574	Rhipicephalus sanguineus	Eukaryota; Metazoa; Arthropoda; Chelicerata; Arachnida; Acari; Parasitiformes; Ixodida; Ixodoidea; Ixodidae; Rhipicephalinae; Rhipicephalus; Rhipicephalus.	M	M	119	evasin	ExpAA=3.85 First60=3.85 PredHel=0 Topology=o	0					SIG	19-20	12.771	8.44	10.617	8.17	ECD_cys disintegrin |	1	evasin	2E-066	gi|260908574	255	118	119	100	100	Rhipicephalus sanguineus	Evasin-1	0.012	sp|P0C8E7|EVA1_RHISA	38.5	74	114	28	66	Rhipicephalus sanguineus	DUF2338	2.8	FN3	1.4	PTZ00328	0.87	PTZ00328 | PRK14466 | PLN02680 | PLN03218 | PRK08211 |	231	1	257
gi|260908572	gi|260908572	Rhipicephalus sanguineus	Eukaryota; Metazoa; Arthropoda; Chelicerata; Arachnida; Acari; Parasitiformes; Ixodida; Ixodoidea; Ixodidae; Rhipicephalinae; Rhipicephalus; Rhipicephalus.	M	M	120	putative secreted salivary protein	ExpAA=13.67 First60=13.67 PredHel=1 Topology=o5-24i	1	15.8	4.2	80		BL	23-24	13.185	6.77	10.49	5.81	MLD_cys disintegrin |	1	putative secreted salivary protein	2E-070	gi|260908572	268	119	120	100	100	Rhipicephalus sanguineus	Kielin/chordin-like protein	0.86	sp|Q9IBG7|KCP_XENLA	32.3	94	2327	24	4	Xenopus laevis	DUF1188	0.34	TyrKc	1.0	DUF1188	1.5	DUF1188 | Aldose_epim | DFP | W_rich_C | GltS | PHA03026 | PTZ00482 |	232	1	258
gi|260908518	gi|260908518	Rhipicephalus sanguineus	Eukaryota; Metazoa; Arthropoda; Chelicerata; Arachnida; Acari; Parasitiformes; Ixodida; Ixodoidea; Ixodidae; Rhipicephalinae; Rhipicephalus; Rhipicephalus.	M	M	150	hypothetical protein	ExpAA=0.00 First60=0.00 PredHel=0 Topology=o	0					SIG	19-20	17.158	8.8	15.215	9.03	RTS_cys disintegrin |	1	hypothetical protein	9E-086	gi|260908518	319	149	150	100	100	Rhipicephalus sanguineus	Tissue factor pathway inhibitor 2	2E-007	sp|Q7YRQ8|TFPI2_BOVIN	54.7	152	234	30	65	Bos taurus	Kunitz_BPTI	4E-006	KU	4E-007	Kunitz_BPTI	2E-005	Kunitz_BPTI 2e-005| KU 3e-005| KU 4e-004| PRK00955 | PRK14898 | C2B_Munc13-like | C2_RGS-like |	1	142	7
gi|260908493	gi|260908493	Rhipicephalus sanguineus	Eukaryota; Metazoa; Arthropoda; Chelicerata; Arachnida; Acari; Parasitiformes; Ixodida; Ixodoidea; Ixodidae; Rhipicephalinae; Rhipicephalus; Rhipicephalus.	M	M	123	mucin-like protein	ExpAA=19.24 First60=19.23 PredHel=1 Topology=i5-23o	1	14.6	81.3	4.1		SIG	25-26	13.435	4.49	10.868	4.36	KGD_cys disintegrin |	1	mucin-like protein	1E-066	gi|260908493	255	122	123	100	100	Rhipicephalus sanguineus	Peritrophin-1	7E-009	sp|O76217|PE1_ANOGA	59.3	152	153	36	100	Anopheles gambiae	CBM_14	5E-009	ChtBD2	2E-010	ChtBD2	1E-008	ChtBD2 1e-008| CBM_14 2e-008| EpsF | PRK05346 | PLN02982 | PRK13528 | PLN02443 | PRK11700 | ndhG | COG3907 |	27	3	31
gi|260908463	gi|260908463	Rhipicephalus sanguineus	Eukaryota; Metazoa; Arthropoda; Chelicerata; Arachnida; Acari; Parasitiformes; Ixodida; Ixodoidea; Ixodidae; Rhipicephalinae; Rhipicephalus; Rhipicephalus.	M	M	89	defensin	ExpAA=22.52 First60=22.52 PredHel=1 Topology=i7-29o	1	24.7	67.4	7.9		SIG	19-20	9.62	6.52	7.628	6.73	RGD_cys disintegrin |	1	defensin	4E-047	gi|260908463	191	88	89	100	100	Rhipicephalus sanguineus	Integrin beta-like protein A	1.9	sp|Q54KF7|SIBA_DICDI	31.2	46	1927	35	2	Dictyostelium discoideum	DUF1211	2.4	PlsC	0.32	PRK09098	1.3	PRK09098 | PRK15397 | PHA03042 | LPLAT_AGPAT-like |	1	142	3
gi|260908354	gi|260908354	Rhipicephalus sanguineus	Eukaryota; Metazoa; Arthropoda; Chelicerata; Arachnida; Acari; Parasitiformes; Ixodida; Ixodoidea; Ixodidae; Rhipicephalinae; Rhipicephalus; Rhipicephalus.	M	M	67	hypothetical secreted peptide precursor	ExpAA=17.29 First60=17.29 PredHel=1 Topology=i5-27o	1	32.8	59.7	7.5		SIG	23-24	7.058	6.79	4.695	6.27	KGD_cys disintegrin |	1	hypothetical secreted peptide precursor	1E-035	gi|260908354	152	66	67	100	100	Rhipicephalus sanguineus	Potassium channel toxin alpha-KTx 6.11	1.9	sp|P0C194|KAX6B_OPIMA	31.2	56	63	33	90	Opisthacanthus madagascariensis	DUF2973	1.1	TR_FER	4.8	PPOX_FMN_DR2398	3.7	PPOX_FMN_DR2398 |	1	142	3
gi|260908350	gi|260908350	Rhipicephalus sanguineus	Eukaryota; Metazoa; Arthropoda; Chelicerata; Arachnida; Acari; Parasitiformes; Ixodida; Ixodoidea; Ixodidae; Rhipicephalinae; Rhipicephalus; Rhipicephalus.	M	M	155	serine proteinase inhibitor	ExpAA=21.56 First60=21.56 PredHel=1 Topology=o5-27i	1	14.2	3.2	82.6		SIG	25-26	18.075	9.61	15.351	9.55	RTS_cys disintegrin |	1	serine proteinase inhibitor	3E-089	gi|260908350	330	154	155	100	100	Rhipicephalus sanguineus	Kunitz-type protease inhibitor 3	0.18	sp|P49223|SPIT3_HUMAN	35	35	89	44	40	Homo sapiens	Kunitz_BPTI	5E-004	KU	1E-004	Kunitz_BPTI	0.002	Kunitz_BPTI 0.002| KU 0.009| KU 0.020| Cupin_5 | PRK05691 | DUF3429 | PLN02992 | PRK12754 | RasGAP_Neurofibromin | DRE_TIM_HCS |	233	1	259
gi|260908278	gi|260908278	Rhipicephalus sanguineus	Eukaryota; Metazoa; Arthropoda; Chelicerata; Arachnida; Acari; Parasitiformes; Ixodida; Ixodoidea; Ixodidae; Rhipicephalinae; Rhipicephalus; Rhipicephalus.	M	M	186	putative secreted histamine binding protein 1	ExpAA=4.17 First60=4.15 PredHel=0 Topology=o	0					SIG	28-29	20.744	5.32	17.438	4.92	RTS_cys disintegrin |	1	putative secreted histamine binding protein 1	1E-108	gi|260908278	395	185	186	100	100	Rhipicephalus sanguineus	Major fimbrial subunit	0.62	sp|P45990|HIFA5_HAEIF	33.9	84	211	22	40	Haemophilus influenzae	DUF3738	3.0	TOP2c	0.89	COG4856	4.9	COG4856 | mnmA | PLN02604 | PTZ00049 |	28	3	260
gi|260908261	gi|260908261	Rhipicephalus sanguineus	Eukaryota; Metazoa; Arthropoda; Chelicerata; Arachnida; Acari; Parasitiformes; Ixodida; Ixodoidea; Ixodidae; Rhipicephalinae; Rhipicephalus; Rhipicephalus.	M	M	161	serine proteinase inhibitor	ExpAA=0.38 First60=0.38 PredHel=0 Topology=o	0					SIG	22-23	17.992	9.06	15.362	9.25	KTS_cys disintegrin |	1	serine proteinase inhibitor	4E-099	gi|260908261	363	160	161	100	100	Rhipicephalus sanguineus	Papilin	2E-007	sp|Q868Z9|PPN_DROME	55.1	770	2898	36	27	Drosophila melanogaster	Kunitz_BPTI	2E-007	KU	7E-009	KU	7E-007	KU 7e-007| Kunitz_BPTI 8e-007| KU 3e-006| PRK14954 0.011| PHA03247 0.041| Herpes_LMP2 | PRK12323 | PHA03307 | PRK12438 | Sporozoite_P67 |	234	1	261
gi|260908255	gi|260908255	Rhipicephalus sanguineus	Eukaryota; Metazoa; Arthropoda; Chelicerata; Arachnida; Acari; Parasitiformes; Ixodida; Ixodoidea; Ixodidae; Rhipicephalinae; Rhipicephalus; Rhipicephalus.	M	M	217	hypothetical secreted protein	ExpAA=0.88 First60=0.75 PredHel=0 Topology=o	0					SIG	18-19	22.24	4.52	20.48	4.44	VGD_cys disintegrin |	1	hypothetical secreted protein	1E-119	gi|260908255	432	216	217	100	100	Rhipicephalus sanguineus	Beta-glucosidase-like SFR2, chloroplastic	0.13	sp|Q8L6H7|SFR2_ORYSJ	36.6	85	647	24	13	Oryza sativa subsp. japonica	DUF1329	2.1	VPS9	2.0	ABC_FtsE_transp	2.7	ABC_FtsE_transporter | flagell_FlgJ | eno | CobT | PRK11331 |	235	1	262
gi|260908243	gi|260908243	Rhipicephalus sanguineus	Eukaryota; Metazoa; Arthropoda; Chelicerata; Arachnida; Acari; Parasitiformes; Ixodida; Ixodoidea; Ixodidae; Rhipicephalinae; Rhipicephalus; Rhipicephalus.	M	M	68	hypothetical secreted peptide precursor	ExpAA=17.64 First60=17.64 PredHel=1 Topology=o4-22i	1	26.5	5.9	67.6		SIG	24-25	7.524	8.22	4.753	7.56	KTS_cys disintegrin |	1	hypothetical secreted peptide precursor	2E-034	gi|260908243	149	67	68	100	100	Rhipicephalus sanguineus	Conotoxin AbVIK (Fragment)	0.30	sp|Q9UA71|CO16K_CONAB	33.9	56	74	28	77	Conus abbreviatus	SGT1	0.30	VKc	2.5	PRK14290	1.3	PRK14290 | SGT1 | MdoH | Paf67 |	236	1	263
gi|260908241	gi|260908241	Rhipicephalus sanguineus	Eukaryota; Metazoa; Arthropoda; Chelicerata; Arachnida; Acari; Parasitiformes; Ixodida; Ixodoidea; Ixodidae; Rhipicephalinae; Rhipicephalus; Rhipicephalus.	M	M	216	putative secreted salivary protein	ExpAA=0.74 First60=0.74 PredHel=0 Topology=o	0					SIG	20-21	23.99	6.04	21.853	6.62	ECD_cys disintegrin |	1	putative secreted salivary protein	1E-135	gi|260908241	484	215	216	100	100	Rhipicephalus sanguineus	Neurocan core protein	0.83	sp|P55066|NCAN_MOUSE	33.9	43	1268	35	3	Mus musculus	DUF2403	0.84	SERPIN	2.4	trypano_reduc	3.3	trypano_reduc | DUF2403 |	237	1	264
gi|196476855	gi|196476855	Amblyomma americanum	Eukaryota; Metazoa; Arthropoda; Chelicerata; Arachnida; Acari; Parasitiformes; Ixodida; Ixodoidea; Ixodidae; Amblyomminae; Amblyomma.	M	M	153	putative secreted protein	ExpAA=3.22 First60=3.22 PredHel=0 Topology=o	0					SIG	18-19	17.586	9.24	15.619	9.3	KTS_cys disintegrin |	1	putative secreted protein	3E-088	gi|196476855	327	152	153	100	100	Amblyomma americanum	Tissue factor pathway inhibitor 2	0.009	sp|O35536|TFPI2_MOUSE	39.3	97	230	32	43	Mus musculus	Kunitz_BPTI	0.23	KU	7E-004	KU	0.064	KU 0.064| KU | Kunitz_BPTI | GshA | PTZ00188 | 2A067 | P_fruct_ADP |	1	142	7
gi|196476851	gi|196476851	Amblyomma americanum	Eukaryota; Metazoa; Arthropoda; Chelicerata; Arachnida; Acari; Parasitiformes; Ixodida; Ixodoidea; Ixodidae; Amblyomminae; Amblyomma.	M	M	156	putative secreted protein	ExpAA=0.50 First60=0.50 PredHel=0 Topology=o	0					SIG	18-19	17.827	9.05	15.884	9.11	KTS_cys disintegrin |	1	putative secreted protein	2E-092	gi|196476851	341	155	156	100	100	Amblyomma americanum	Tissue factor pathway inhibitor 2	0.013	sp|O35536|TFPI2_MOUSE	38.9	143	230	27	63	Mus musculus	Kunitz_BPTI	0.064	KU	5E-004	KU	0.044	KU 0.044| KU | Kunitz_BPTI | PHA01795 | PRK15021 | 2A060602 | PTZ00188 | PRK10422 | PHA02994 |	1	142	7
gi|196476849	gi|196476849	Amblyomma americanum	Eukaryota; Metazoa; Arthropoda; Chelicerata; Arachnida; Acari; Parasitiformes; Ixodida; Ixodoidea; Ixodidae; Amblyomminae; Amblyomma.	M	M	154	putative secreted protein	ExpAA=6.11 First60=6.11 PredHel=0 Topology=o	0					SIG	18-19	17.764	9.14	15.799	9.21	KTS_cys disintegrin |	1	putative secreted protein	2E-089	gi|196476849	331	153	154	100	100	Amblyomma americanum	Chelonianin	0.035	sp|P00993|IBP_CARCR	37.4	56	110	34	52	Caretta caretta	Kunitz_BPTI	0.13	KU	0.001	KU	0.092	KU 0.092| KU | Kunitz_BPTI | PHA02994 | COG4889 | PRK12843 | PRK14511 | PHA01795 |	1	142	7
gi|196476654	gi|196476654	Amblyomma americanum	Eukaryota; Metazoa; Arthropoda; Chelicerata; Arachnida; Acari; Parasitiformes; Ixodida; Ixodoidea; Ixodidae; Amblyomminae; Amblyomma.	M	M	154	hypothetical Kunitz-type peptidase inhibitor	ExpAA=0.10 First60=0.10 PredHel=0 Topology=o	0					SIG	21-22	17.731	9.26	15.459	9.23	KTS_cys disintegrin |	1	hypothetical Kunitz-type peptidase inhibitor	1E-089	gi|196476654	332	153	154	100	100	Amblyomma americanum	Vestiginin-2	1E-004	sp|A6MFL2|IVBI2_DEMVE	45.8	75	83	32	92	Demansia vestigiata	Kunitz_BPTI	0.012	KU	3E-005	KU	0.002	KU 0.002| KU 0.010| Kunitz_BPTI 0.055| PLN03080 | succ_dehyd_cytB | YABBY | UPF0565 |	1	142	7
gi|194246047	gi|194246047	Dermacentor variabilis	Eukaryota; Metazoa; Arthropoda; Chelicerata; Arachnida; Acari; Parasitiformes; Ixodida; Ixodoidea; Ixodidae; Rhipicephalinae; Dermacentor.	T	T	135	putative midgut serine proteinase	ExpAA=0.00 First60=0.00 PredHel=0 Topology=o	0					CYT		15.031	5.28			KGD_cys disintegrin |	1	putative midgut serine proteinase	9E-079	gi|194246047	296	134	135	100	100	Dermacentor variabilis	Chymotrypsinogen A	2E-010	sp|P00766|CTRA_BOVIN	64.7	111	245	36	46	Bos taurus	Trypsin	2E-008	Tryp_SPc	1E-013	Tryp_SPc	7E-012	Tryp_SPc 7e-012| Tryp_SPc 1e-011| Trypsin 7e-008| COG5640 2e-004| DUF316 | glgA_Coryne | pulA_typeI | PRK14955 | carnitine_bodg | PRK14954 |	7	14	10
gi|209418822	gi|209418822	Rhipicephalus microplus	Eukaryota; Metazoa; Arthropoda; Chelicerata; Arachnida; Acari; Parasitiformes; Ixodida; Ixodoidea; Ixodidae; Rhipicephalinae; Rhipicephalus; Boophilus.	L	L	167	complement inhibitor	ExpAA=0.00 First60=0.00 PredHel=0 Topology=o	0					CYT		18.559	4.82			MLD_cys disintegrin |	1	complement inhibitor	4E-094	gi|209418822	347	166	167	100	100	Rhipicephalus microplus	Moubatin	5E-038	sp|Q04669|MOUB_ORNMO	156	156	171	47	92	Ornithodoros moubata	HOOK	1.0	CBD_II	0.19	PRK14973	4.2	PRK14973 | HOOK | PRK01637 | pabC_Proteo | Gem_osc_para_1 |	4	24	6
gi|188531994	gi|188531994	Dermacentor variabilis	Eukaryota; Metazoa; Arthropoda; Chelicerata; Arachnida; Acari; Parasitiformes; Ixodida; Ixodoidea; Ixodidae; Rhipicephalinae; Dermacentor.	M	M	654	proprotein convertase type 2 precursor	ExpAA=2.13 First60=1.82 PredHel=0 Topology=o	0					SIG	21-22	72.073	7.11	69.983	6.82	KTS_cys disintegrin |	1	proprotein convertase type 2 precursor	0.0	gi|188531994	1358	653	654	100	100	Dermacentor variabilis	Neuroendocrine convertase 2	0.0	sp|P28841|NEC2_RAT	778	601	637	62	95	Rattus norvegicus	Peptidase_S8	1E-070	POLBc	1.4	Peptidases_S8_	1E-138	Peptidases_S8_Protein_convertases_Kexins... 487 e-138 e-138| Peptidase_S8 7e-070| P_proprotein 1e-028| Peptidases_S8_Subtilisin_like 5e-024| Peptidases_S8_S53 2e-023| Peptidases_S8_15 1e-022| AprE 4e-017| Peptidases_S8_Thermitase_like 6e-017| Peptidases_S8_Subtilisin_subset 1e-016| Peptidases_S8_Fervidolysin_like 7e-016|	32	3	36
gi|161788938	gi|161788938	Haemaphysalis longicornis	Eukaryota; Metazoa; Arthropoda; Chelicerata; Arachnida; Acari; Parasitiformes; Ixodida; Ixodoidea; Ixodidae; Haemaphysalinae; Haemaphysalis.	M	M	442	2nd tick legumain	ExpAA=0.34 First60=0.31 PredHel=0 Topology=o	0					SIG	20-21	49.638	6.99	47.537	6.66	VGD_cys disintegrin |	1	2nd tick legumain	0.0	gi|161788938	897	441	442	100	100	Haemaphysalis longicornis	Legumain	1E-116	sp|Q95M12|LGMN_BOVIN	419	422	433	51	98	Bos taurus	Peptidase_C13	1E-117	acidPPc	0.14	Peptidase_C13	1E-116	Peptidase_C13 e-116| GPI8 2e-020| DUF947 | DUF218 | MRJP | UBAN | YdcF-like | PRK07362 | SerS | RhaS |	217	2	236
gi|124389894	gi|124389894	Rhipicephalus sanguineus	Eukaryota; Metazoa; Arthropoda; Chelicerata; Arachnida; Acari; Parasitiformes; Ixodida; Ixodoidea; Ixodidae; Rhipicephalinae; Rhipicephalus; Rhipicephalus.	M	M	653	Bm86-like protein	ExpAA=4.07 First60=0.94 PredHel=0 Topology=o	0					SIG	19-20	72.148	6.2	70.377	6.08	VGD_cys disintegrin |RTS_cys disintegrin |	2	Bm86-like protein	0.0	gi|124389894	1395	652	653	100	100	Rhipicephalus sanguineus	Glycoprotein antigen BM86	0.0	sp|P20736|BM86_BOOMI	997	647	650	71	100	Boophilus microplus	DUF2764	1.3	BID_1	1.9	CMP-NeuAc_Synth	0.61	CMP-NeuAc_Synthase | rnhB | PTZ00459 |	3	38	2
gi|145651607	gi|145651607	Haemaphysalis longicornis	Eukaryota; Metazoa; Arthropoda; Chelicerata; Arachnida; Acari; Parasitiformes; Ixodida; Ixodoidea; Ixodidae; Haemaphysalinae; Haemaphysalis.	M	M	594	Bm86-like protein	ExpAA=1.48 First60=0.30 PredHel=0 Topology=o	0					SIG	19-20	66.126	5.53	64.272	5.47	KTS_cys disintegrin |RED_cys disintegrin |	2	Bm86-like protein	0.0	gi|145651607	1276	593	594	100	100	Haemaphysalis longicornis	Glycoprotein antigen BM86	1E-135	sp|P20736|BM86_BOOMI	483	546	650	45	84	Boophilus microplus	Trypan_PARP	0.013	MYSc	0.68	COG5373	0.009	COG5373 0.009| PHA03291 0.028| Trypan_PARP 0.075| PRK14718 | Podoplanin | PRK07764 | PHA03269 | PRK12495 | PHA03294 | MARCKS |	3	38	2
gi|68264899	gi|68264899	Haemaphysalis longicornis	Eukaryota; Metazoa; Arthropoda; Chelicerata; Arachnida; Acari; Parasitiformes; Ixodida; Ixodoidea; Ixodidae; Haemaphysalinae; Haemaphysalis.	M	M	150	hypothetical protein	ExpAA=9.29 First60=9.29 PredHel=0 Topology=o	0					SIG	19-20	17.674	8.72	15.543	8.65	KGD_cys disintegrin |	1	hypothetical protein	2E-088	gi|68264899	328	149	150	100	100	Haemaphysalis longicornis	Papilin	5E-010	sp|O76840|PPN1_CAEEL	63.2	870	2167	30	40	Caenorhabditis elegans	Kunitz_BPTI	7E-007	KU	4E-009	KU	4E-007	KU 4e-007| Kunitz_BPTI 3e-006| KU 6e-006| PRK15011 | urea_degr_1 | Limkain-b1 | PRK06710 | APPLE_Factor_XI_like |	1	142	7
gi|68131543	gi|68131543	Haemaphysalis longicornis	Eukaryota; Metazoa; Arthropoda; Chelicerata; Arachnida; Acari; Parasitiformes; Ixodida; Ixodoidea; Ixodidae; Haemaphysalinae; Haemaphysalis.	M	M	115	hypothetical protein	ExpAA=19.99 First60=19.99 PredHel=1 Topology=o4-23i	1	16.5	3.5	80		SIG	24-25	12.678	8.02	9.92	7.67	RGD_cys disintegrin |	1	hypothetical protein	1E-068	gi|68131543	262	114	115	100	100	Haemaphysalis longicornis	Trypsin inhibitor	0.001	sp|P19398|ITR1_ASCSU	42	32	62	57	53	Ascaris suum	TIL	2E-005	AICARFT_IMPCHas	0.22	TIL	1E-004	TIL 1e-004| DUF1523 0.021| Anoctamin 0.076| YbiR_permease | ND1 | PRK08298 | purH | oxalate_frc | PHA03145 |	1	142	5
gi|89277230	gi|89277230	Rhipicephalus haemaphysaloides	Eukaryota; Metazoa; Arthropoda; Chelicerata; Arachnida; Acari; Parasitiformes; Ixodida; Ixodoidea; Ixodidae; Rhipicephalinae; Rhipicephalus; Rhipicephalus.	M	M	468	metalloproteinase	ExpAA=0.03 First60=0.01 PredHel=0 Topology=o	0					SIG	16-17	53.408	8.99	51.574	9.02	MLD_cys disintegrin |	1	metalloproteinase	0.0	gi|89277230	959	467	468	100	100	Rhipicephalus haemaphysaloides	Disintegrin and metalloproteinase domain-containing protein 8	1E-008	sp|Q05910|ADAM8_MOUSE	61.6	251	826	24	31	Mus musculus	Reprolysin	7E-009	ZnMc	0.047	ZnMc_salivary_g	1E-071	ZnMc_salivary_gland_MPs 1e-071| ZnMc_ADAM_like 5e-028| ZnMc_ADAMTS_like 4e-013| ZnMc_adamalysin_II_like 7e-011| ZnMc 4e-009| Reprolysin 4e-008| ZnMc_TACE_like 0.016| PRK07246 0.081| ZnMc_ADAM_fungal | BCAS3 |	241	1	270
gi|419953	gi|419953	Rhipicephalus microplus	Eukaryota; Metazoa; Arthropoda; Chelicerata; Arachnida; Acari; Parasitiformes; Ixodida; Ixodoidea; Ixodidae; Rhipicephalinae; Rhipicephalus; Boophilus.	K	K	180	glycoprotein antigen BM86 - southern cattle tick (fragments)	ExpAA=0.00 First60=0.00 PredHel=0 Topology=o	0					CYT		19.738	6.05			RTS_cys disintegrin |	1	glycoprotein antigen BM86 - southern cattle tick (fragments)	1E-105	gi|419953	385	179	180	100	100		Glycoprotein antigen BM86	6E-022	sp|P20736|BM86_BOOMI	103	512	650	61	79	Boophilus microplus	DUF373	0.30	Sema	1.6	DUF373	1.5	DUF373 | secA | gal_kin | PLN02972 |	1	142	271
Ticks - Prostriates
gi|241238861	gi|241238861	Ixodes scapularis	Eukaryota; Metazoa; Arthropoda; Chelicerata; Arachnida; Acari; Parasitiformes; Ixodida; Ixodoidea; Ixodidae; Ixodinae; Ixodes.	M	M	60	secreted protein, putative	ExpAA=19.39 First60=19.39 PredHel=1 Topology=o4-23i	1	31.7	6.7	61.7		SIG	21-22	6.548	4.59	4.435	4.59	RGD_cys disintegrin |	1	secreted protein, putative	7E-030	gi|241238861	133	59	60	100	100	Ixodes scapularis	Twisted gastrulation protein homolog 1	7.2	sp|Q9EP52|TWSG1_MOUSE	29.3	46	222	36	21	Mus musculus	DUF3767	0.61	MYSc	1.5	DUF3767	2.8	DUF3767 | DUF619-NAGS-FABP | PLN02614 |	1	142	3
gi|67083443	gi|67083443	Ixodes scapularis	Eukaryota; Metazoa; Arthropoda; Chelicerata; Arachnida; Acari; Parasitiformes; Ixodida; Ixodoidea; Ixodidae; Ixodinae; Ixodes.	M	M	293	putative salivary secreted protein	ExpAA=0.11 First60=0.11 PredHel=0 Topology=o	0					SIG	21-22	33.652	5.36	31.197	5.24	RGD_cys disintegrin |RED_cys disintegrin |	2	putative salivary secreted protein	0.0	gi|67083443	647	292	293	100	100	Ixodes scapularis	Papilin	2E-022	sp|Q868Z9|PPN_DROME	106	749	2898	28	26	Drosophila melanogaster	Kunitz_BPTI	8E-010	KU	6E-011	Kunitz_BPTI	4E-009	Kunitz_BPTI 4e-009| KU 8e-009| KU 3e-007| AbiF | PRK14485 | Bunya_G1 | PTZ00262 | alcohol_DH_class_I_II_IV |	1	142	35
gi|215510504	gi|215510504	Ixodes scapularis	Eukaryota; Metazoa; Arthropoda; Chelicerata; Arachnida; Acari; Parasitiformes; Ixodida; Ixodoidea; Ixodidae; Ixodinae; Ixodes.	T	T	370	hypothetical protein IscW_ISCW014248	ExpAA=0.00 First60=0.00 PredHel=0 Topology=o	0					CYT		41.32	8			RGD_cys disintegrin |	1	hypothetical protein IscW_ISCW014248	0.0	gi|241860645	776	369	370	100	100	Ixodes scapularis	Loricrin	0.003	sp|P23490|LORI_HUMAN	43.1	287	312	31	92	Homo sapiens	PAN_1	1E-006	PAN_AP	5E-008	PAN_AP_HGF	3E-009	PAN_AP_HGF 3e-009| PAN_1 6e-006| PAN_AP 6e-006| PHA03309 0.047| COG1512 0.067| III | PRK06958 | COG2833 | PLN03134 | Cloacin |	35	2	40
gi|74817293	gi|74817293	Ixodes scapularis	Eukaryota; Metazoa; Arthropoda; Chelicerata; Arachnida; Acari; Parasitiformes; Ixodida; Ixodoidea; Ixodidae; Ixodinae; Ixodes.	M	M	69	Antimicrobial peptide ISAMP; Flags: Precursor	ExpAA=14.57 First60=14.57 PredHel=1 Topology=i5-22o	1	24.6	68.1	7.2		SIG	22-23	7.828	8.57	5.325	8.68	WGD_cys disintegrin |	1	Antimicrobial peptide ISAMP; Flags: Precursor	8E-037	gi|74817293	156	68	69	100	100	Ixodes scapularis	Antimicrobial peptide ISAMP	3E-038	sp|Q8MVA6|ISAMP_IXOSC	156	68	69	100	100	Ixodes scapularis	DUF1800	0.26	NTR	0.97	SapB	0.079	SapB 0.079| PRK09579 | DUF1800 | hydroxyacyl_CoA_DH | FDH_like | MSC | sugar_DH | ESSS | oppB |	1	142	3
gi|67083359	gi|67083359	Ixodes scapularis	Eukaryota; Metazoa; Arthropoda; Chelicerata; Arachnida; Acari; Parasitiformes; Ixodida; Ixodoidea; Ixodidae; Ixodinae; Ixodes.	M	M	85	putative secreted protein	ExpAA=7.04 First60=7.04 PredHel=0 Topology=o	0					SIG	27-28	8.957	4.85	6.181	4.72	RTS_cys disintegrin |	1	putative secreted protein	1E-044	gi|67083359	182	84	85	100	100	Ixodes scapularis	BPTI/Kunitz domain-containing protein (Fragment)	2E-004	sp|P86733|KCP_HALAI	44.7	64	126	38	52	Haliotis asinina	Kunitz_BPTI	6E-004	KU	0.001	Kunitz_BPTI	0.003	Kunitz_BPTI 0.003| KU 0.017| KU 0.094| DDE_Tnp_ISAZ013 | PHA03309 | PRK10356 | PRK00068 | EspG |	1	142	5
gi|242002738	gi|242002738	Ixodes scapularis	Eukaryota; Metazoa; Arthropoda; Chelicerata; Arachnida; Acari; Parasitiformes; Ixodida; Ixodoidea; Ixodidae; Ixodinae; Ixodes.	R	R	1043	hemolectin, putative	ExpAA=0.01 First60=0.00 PredHel=0 Topology=o	0					CYT		115.9	5.54			ECD_cys disintegrin |	1	hemolectin, putative	0.0	gi|242002738	2249	1042	1043	100	100	Ixodes scapularis	SCO-spondin	1E-158	sp|Q2PC93|SSPO_CHICK	560	4942	5255	32	94	Gallus gallus	VWD	2E-023	VWD	6E-030	VWD	8E-028	VWD 8e-028| VWD 1e-022| C8 9e-012| C8 2e-009| TIL 2e-006| VWC_out | VESA1_N |	39	2	46
gi|242002586	gi|242002586	Ixodes scapularis	Eukaryota; Metazoa; Arthropoda; Chelicerata; Arachnida; Acari; Parasitiformes; Ixodida; Ixodoidea; Ixodidae; Ixodinae; Ixodes.	L	L	239	trypsin, putative	ExpAA=0.59 First60=0.58 PredHel=0 Topology=o	0					CYT		27.004	6.38			KGD_cys disintegrin |	1	trypsin, putative	1E-144	gi|242002586	515	238	239	100	100	Ixodes scapularis	Serine proteinase stubble	2E-041	sp|Q05319|STUB_DROME	169	212	787	37	27	Drosophila melanogaster	Trypsin	1E-041	Tryp_SPc	2E-060	Tryp_SPc	2E-058	Tryp_SPc 2e-058| Tryp_SPc 3e-054| Trypsin 8e-041| COG5640 3e-021| PTZ00303 | PRK15204 | IFRD | Bax1-I | COG3591 | ESAG1 |	7	14	10
gi|242002500	gi|242002500	Ixodes scapularis	Eukaryota; Metazoa; Arthropoda; Chelicerata; Arachnida; Acari; Parasitiformes; Ixodida; Ixodoidea; Ixodidae; Ixodinae; Ixodes.	M	M	150	major epididymal secretory protein HE1, putative	ExpAA=20.52 First60=20.30 PredHel=1 Topology=i5-24o	1	12.7	84	3.3		SIG	16-17	16.582	9.15	15.088	9.24	VGD_cys disintegrin |	1	major epididymal secretory protein HE1, putative	1E-082	gi|242002500	308	149	150	100	100	Ixodes scapularis	Epididymal secretory protein E1	4E-013	sp|P79345|NPC2_BOVIN	73.6	143	149	26	97	Bos taurus	E1_DerP2_DerF2	4E-024	ML	4E-017	E1_DerP2_DerF2	2E-023	E1_DerP2_DerF2 2e-023| Npc2_like 5e-020| ML 3e-015| Der-p2_like 6e-013| ML 1e-010| DUF3016 | laccase | HxlR | DNA_Packaging_2 | PHA00425 |	40	2	47
gi|242002450	gi|242002450	Ixodes scapularis	Eukaryota; Metazoa; Arthropoda; Chelicerata; Arachnida; Acari; Parasitiformes; Ixodida; Ixodoidea; Ixodidae; Ixodinae; Ixodes.	Y	Y	1120	ubiquitin specific protease, putative	ExpAA=0.02 First60=0.00 PredHel=0 Topology=o	0					CYT		125.44	6.55			MLD_cys disintegrin |	1	ubiquitin specific protease, putative	0.0	gi|242002450	2269	1119	1120	100	100	Ixodes scapularis	PAB-dependent poly(A)-specific ribonuclease subunit 2	0.0	sp|Q5F450|PAN2_CHICK	956	1120	1197	45	94	Gallus gallus	RNase_T	6E-020	EXOIII	1E-027	PAN2_exo	2E-095	PAN2_exo 2e-095| DEDDh_RNase 2e-033| REX4_like 1e-026| EXOIII 2e-025| REX1_like 3e-023| Peptidase_C19P 2e-021| RNase_T 3e-019| ISG20 2e-016| WD40 2e-006| UCH 3e-006|	41	2	48
gi|242002374	gi|242002374	Ixodes scapularis	Eukaryota; Metazoa; Arthropoda; Chelicerata; Arachnida; Acari; Parasitiformes; Ixodida; Ixodoidea; Ixodidae; Ixodinae; Ixodes.	Q	Q	1347	hypothetical protein IscW_ISCW006057	ExpAA=0.12 First60=0.12 PredHel=0 Topology=o	0					CYT		141.443	7.91			KTS_cys disintegrin |	1	hypothetical protein IscW_ISCW006057	0.0	gi|242002374	2704	1346	1347	100	100	Ixodes scapularis	Serine-rich adhesin for platelets	5E-030	sp|Q4L9P0|SRAP_STAHJ	134	3482	3608	20	97	Staphylococcus haemolyticus (strain JCSC1435)	Herpes_gp2	2E-004	acidPPc	0.56	PHA03247	9E-004	PHA03247 9e-004| Herpes_gp2 0.001| rad2 0.005| Herpes_TAF50 | PRK08581 | PHA03307 | ROM1 | Atrophin-1 | PAT1 | PRK15314 |	42	2	49
gi|242002246	gi|242002246	Ixodes scapularis	Eukaryota; Metazoa; Arthropoda; Chelicerata; Arachnida; Acari; Parasitiformes; Ixodida; Ixodoidea; Ixodidae; Ixodinae; Ixodes.	Q	Q	314	HSP70 binding protein, putative	ExpAA=0.01 First60=0.01 PredHel=0 Topology=o	0					CYT		35.076	5.45			RTS_cys disintegrin |	1	HSP70 binding protein, putative	1E-180	gi|242002246	633	313	314	100	100	Ixodes scapularis	Hsp70-binding protein 1	2E-036	sp|Q4R588|HPBP1_MACFA	153	314	364	34	87	Macaca fascicularis	Glyco_hydro_70	0.84	ARM	0.78	ARM	3E-007	ARM 3e-007| PLN03200 0.086| PRK14707 | PRK11921 | PRK14951 | COG1543 | CRF-BP | Macro_H2A_like | PRK00723 | VATPase_H |	43	2	50
gi|242002184	gi|242002184	Ixodes scapularis	Eukaryota; Metazoa; Arthropoda; Chelicerata; Arachnida; Acari; Parasitiformes; Ixodida; Ixodoidea; Ixodidae; Ixodinae; Ixodes.	M	M	179	arginine-rich protein, putative	ExpAA=19.06 First60=19.06 PredHel=1 Topology=o5-24i	1	10.6	2.8	86.6		SIG	26-27	20.338	6.45	17.561	6.99	KTS_cys disintegrin |	1	arginine-rich protein, putative	1E-100	gi|242002184	366	178	179	100	100	Ixodes scapularis	Mesencephalic astrocyte-derived neurotrophic factor homolog	1E-053	sp|B4LX78|ARMET_DROVI	208	165	173	60	96	Drosophila virilis	Armet	5E-049	SAP	0.29	Armet	3E-048	Armet 3e-048| PRK14707 | COG2071 | Med30 | GATase1_2 | COG4310 |	31	3	34
gi|242002080	gi|242002080	Ixodes scapularis	Eukaryota; Metazoa; Arthropoda; Chelicerata; Arachnida; Acari; Parasitiformes; Ixodida; Ixodoidea; Ixodidae; Ixodinae; Ixodes.	I	I	556	conserved hypothetical protein	ExpAA=0.03 First60=0.00 PredHel=0 Topology=o	0					CYT		64.1	9.32			MLD_cys disintegrin |	1	conserved hypothetical protein	0.0	gi|242002080	1145	555	556	100	100	Ixodes scapularis	N-acetylgalactosamine-6-sulfatase	0.89	sp|P34059|GALNS_HUMAN	35.8	110	522	25	21	Homo sapiens	DUF229	1E-086	Gp_dh_N	1.0	DUF229	7E-086	DUF229 7e-086| Sulfatase 1e-007| Phosphodiest 1e-005| COG3083 0.003| DUF1501 0.014| AslA 0.033| PRK13759 | MdoB | COG1524 | GH31_xylosidase_XylS |	44	2	51
gi|242001748	gi|242001748	Ixodes scapularis	Eukaryota; Metazoa; Arthropoda; Chelicerata; Arachnida; Acari; Parasitiformes; Ixodida; Ixodoidea; Ixodidae; Ixodinae; Ixodes.	A	A	51	hypothetical protein IscW_ISCW019152	ExpAA=0.00 First60=0.00 PredHel=0 Topology=i	0					CYT		5.266	8.56			RGD_cys disintegrin |	1	hypothetical protein IscW_ISCW019152	2E-024	gi|242001748	115	50	51	100	100	Ixodes scapularis	Multiple epidermal growth factor-like domains protein 9	0.046	sp|Q9H1U4|MEGF9_HUMAN	36.6	65	602	38	11	Homo sapiens	DUF3496	0.82	RNAse_Pc	3.2	DUF3496	3.7	DUF3496 | COG5386 |	45	2	52
gi|242001596	gi|242001596	Ixodes scapularis	Eukaryota; Metazoa; Arthropoda; Chelicerata; Arachnida; Acari; Parasitiformes; Ixodida; Ixodoidea; Ixodidae; Ixodinae; Ixodes.	M	M	782	DnaJ domain and thioredoxin-containing protein, putative	ExpAA=0.19 First60=0.18 PredHel=0 Topology=o	0					SIG	18-19	88.202	5.99	86.345	5.94	KTS_cys disintegrin |	1	DnaJ domain and thioredoxin-containing protein, putative	0.0	gi|242001596	1621	781	782	100	100	Ixodes scapularis	DnaJ homolog subfamily C member 10	1E-162	sp|Q8IXB1|DJC10_HUMAN	571	728	793	40	92	Homo sapiens	DnaJ	2E-023	DnaJ	9E-020	PDI_a_ERdj5_N	5E-031	PDI_a_ERdj5_N 5e-031| PDI_a_ERdj5_C 5e-030| PDI_a_family 6e-026| DnaJ 9e-025| DnaJ_bact 2e-024| PRK10767 7e-024| pdi_dom 4e-023| PRK14293 8e-023| DnaJ 1e-022| ER_PDI_fam 1e-021|	46	2	53
gi|242001532	gi|242001532	Ixodes scapularis	Eukaryota; Metazoa; Arthropoda; Chelicerata; Arachnida; Acari; Parasitiformes; Ixodida; Ixodoidea; Ixodidae; Ixodinae; Ixodes.	M	M	497	masquerade, putative	ExpAA=0.19 First60=0.18 PredHel=0 Topology=o	0					SIG	23-24	54.279	5.22	51.782	5.21	RGD_cys disintegrin |	1	masquerade, putative	0.0	gi|242001532	1044	496	497	100	100	Ixodes scapularis	Serine protease 55	1E-024	sp|Q6UWB4|PRS55_HUMAN	115	258	352	28	74	Homo sapiens	Trypsin	4E-033	Tryp_SPc	5E-045	Tryp_SPc	6E-044	Tryp_SPc 6e-044| Tryp_SPc 6e-043| Trypsin 2e-032| COG5640 2e-012| PRK10856 8e-004| BchD-ChlD 0.003| PHA03247 0.003| PRK14950 0.019| DUF729 0.029| bchD 0.034|	7	14	54
gi|242001508	gi|242001508	Ixodes scapularis	Eukaryota; Metazoa; Arthropoda; Chelicerata; Arachnida; Acari; Parasitiformes; Ixodida; Ixodoidea; Ixodidae; Ixodinae; Ixodes.	M	M	1764	hypothetical protein IscW_ISCW018695	ExpAA=0.72 First60=0.03 PredHel=0 Topology=o	0					SIG	21-22	189.341	6.74	187.332	6.68	RED_cys disintegrin |	1	hypothetical protein IscW_ISCW018695	0.0	gi|242001508	3497	1763	1764	100	100	Ixodes scapularis	Chitinase-like protein DS47	0.026	sp|Q23997|CH47_DROME	42.7	59	452	40	13	Drosophila melanogaster	DUF2397	0.18	Glyco_18	0.44	GH18_chitinase-	0.040	GH18_chitinase-like 0.040| GH18_IDGF | glnS | CxxC_CxxC_SSSS | DUF2397 | CAD | Glycos_transf_3 | Lycopene_cycl | WES_acyltransf |	47	2	55
gi|242001144	gi|242001144	Ixodes scapularis	Eukaryota; Metazoa; Arthropoda; Chelicerata; Arachnida; Acari; Parasitiformes; Ixodida; Ixodoidea; Ixodidae; Ixodinae; Ixodes.	M	M	204	secreted protein, putative	ExpAA=0.03 First60=0.01 PredHel=0 Topology=o	0					SIG	16-17	22.399	8.37	20.815	8.41	VGD_cys disintegrin |	1	secreted protein, putative	1E-113	gi|242001144	411	203	204	100	100	Ixodes scapularis	Chemotaxis response regulator protein-glutamate methylesterase 1	0.57	sp|Q2INJ8|CHEB1_ANADE	34.3	86	349	31	25	Anaeromyxobacter dehalogenans (strain 2CP-C)	MRC1	3.3	JHBP	0.92	DNA_pol_A_pol_I	0.63	DNA_pol_A_pol_I_A | PTKc_EphR_A10 | PRK15004 | PTZ00469 | PRK12904 |	48	2	56
gi|242001014	gi|242001014	Ixodes scapularis	Eukaryota; Metazoa; Arthropoda; Chelicerata; Arachnida; Acari; Parasitiformes; Ixodida; Ixodoidea; Ixodidae; Ixodinae; Ixodes.	G	G	935	heat shock protein 70 (HSP70)-interacting protein, putative	ExpAA=0.01 First60=0.00 PredHel=0 Topology=o	0					CYT		103.921	6.28			KGD_cys disintegrin |	1	heat shock protein 70 (HSP70)-interacting protein, putative	0.0	gi|242001014	1808	934	935	100	100	Ixodes scapularis	Protein unc-45 homolog B	1E-155	sp|Q8CGY6|UN45B_MOUSE	551	926	931	35	100	Mus musculus	UNC45-central	2E-010	TPR	6E-004	TPR	6E-013	TPR 6e-013| 3a0801s09 3e-010| UNC45-central 1e-009| PLN03088 6e-006| PEP_TPR_lipo 7e-005| NrfG 3e-004| COG4783 0.010| ARM 0.010| OM_YfiO 0.012| TPR_2 0.032|	49	2	57
gi|242000940	gi|242000940	Ixodes scapularis	Eukaryota; Metazoa; Arthropoda; Chelicerata; Arachnida; Acari; Parasitiformes; Ixodida; Ixodoidea; Ixodidae; Ixodinae; Ixodes.	G	G	382	LAMMER dual specificity kinase, putative	ExpAA=0.14 First60=0.00 PredHel=0 Topology=o	0					CYT		44.547	6.36			MLD_cys disintegrin |	1	LAMMER dual specificity kinase, putative	0.0	gi|242000940	792	381	382	100	100	Ixodes scapularis	Serine/threonine-protein kinase Doa	1E-154	sp|P49762|DOA_DROME	543	375	832	69	45	Drosophila melanogaster	Pkinase	2E-050	S_TKc	6E-057	S_TKc	7E-055	S_TKc 7e-055| Pkinase 8e-050| PTZ00284 1e-049| STKc_CDK_like 3e-038| STYKc 8e-038| PKc 2e-036| STKc_MOK 3e-035| STKc_CMGC 2e-034| STKc_MAK_like 3e-033| STKc_CDK4_6_like 6e-033|	50	2	58
gi|242000850	gi|242000850	Ixodes scapularis	Eukaryota; Metazoa; Arthropoda; Chelicerata; Arachnida; Acari; Parasitiformes; Ixodida; Ixodoidea; Ixodidae; Ixodinae; Ixodes.	M	M	263	hypothetical protein IscW_ISCW005338	ExpAA=0.86 First60=0.85 PredHel=0 Topology=o	0					SIG	24-25	28.685	5.2	26.121	4.97	RGD_cys disintegrin |VGD_cys disintegrin |	2	hypothetical protein IscW_ISCW005338	1E-155	gi|242000850	551	262	263	100	100	Ixodes scapularis	Neuropilin-1	7E-007	sp|Q9QWJ9|NRP1_RAT	54.7	228	922	25	25	Rattus norvegicus	CUB	3E-008	CUB	1E-010	CUB	1E-010	CUB 1e-010| CUB 1e-008| CUB 2e-007| PLN02397 | GH16_kappa_carrageenase | HMG-CoA-S_euk | CD63_LEL | Abhydrolase_3 |	51	2	59
gi|242000610	gi|242000610	Ixodes scapularis	Eukaryota; Metazoa; Arthropoda; Chelicerata; Arachnida; Acari; Parasitiformes; Ixodida; Ixodoidea; Ixodidae; Ixodinae; Ixodes.	M	M	68	secreted protein, putative	ExpAA=22.37 First60=22.37 PredHel=1 Topology=o5-27i	1	32.4	7.4	60.3		SIG	21-22	7.345	4.99	5.233	5	RGD_cys disintegrin |	1	secreted protein, putative	7E-033	gi|242000610	143	67	68	100	100	Ixodes scapularis	Toxin S5C1	21	sp|P01413|TX51_DENJA	27.7	14	61	60	25	Dendroaspis jamesoni kaimosae	RIP	0.73	B561	0.47	spo_II_M	1.1	spo_II_M | RIP | VNFD | alt_nitrog_alph | pbp2_mrdA | ND5 | Pellino |	1	142	3
gi|242000264	gi|242000264	Ixodes scapularis	Eukaryota; Metazoa; Arthropoda; Chelicerata; Arachnida; Acari; Parasitiformes; Ixodida; Ixodoidea; Ixodidae; Ixodinae; Ixodes.	C	C	836	calmodulin-binding transcription activator, putative	ExpAA=0.06 First60=0.04 PredHel=0 Topology=o	0					CYT		92.1	5.35			RGD_cys disintegrin |	1	calmodulin-binding transcription activator, putative	0.0	gi|242000264	1681	835	836	100	100	Ixodes scapularis	Calmodulin-binding transcription activator 2	1E-071	sp|O94983|CMTA2_HUMAN	271	1010	1202	36	84	Homo sapiens	CG-1	1E-013	IQ	7E-004	CG-1	6E-013	CG-1 6e-013| ANK 1e-006| Ank_2 2e-006| TIG 2e-005| PTZ00322 7e-004| IPT_plexin_repeat2 0.001| IPT 0.003| IPT_PCSR 0.006| Ank 0.020| IQ |	52	2	60
gi|242000184	gi|242000184	Ixodes scapularis	Eukaryota; Metazoa; Arthropoda; Chelicerata; Arachnida; Acari; Parasitiformes; Ixodida; Ixodoidea; Ixodidae; Ixodinae; Ixodes.	I	I	80	hypothetical protein IscW_ISCW005723	ExpAA=0.00 First60=0.00 PredHel=0 Topology=o	0					CYT		8.636	5.18			RTS_cys disintegrin |	1	hypothetical protein IscW_ISCW005723	5E-044	gi|242000184	180	79	80	100	100	Ixodes scapularis	Multiple epidermal growth factor-like domains protein 6	3E-018	sp|Q80V70|MEGF6_MOUSE	90.1	360	1572	46	23	Mus musculus	cEGF	4E-004	EGF_CA	0.002	vWA_Matrilin	0.001	vWA_Matrilin 0.001| cEGF 0.002| EGF_CA | EGF_CA | EGF_CA |	53	2	61
gi|242000074	gi|242000074	Ixodes scapularis	Eukaryota; Metazoa; Arthropoda; Chelicerata; Arachnida; Acari; Parasitiformes; Ixodida; Ixodoidea; Ixodidae; Ixodinae; Ixodes.	D	D	469	coiled-coil domain-containing protein 64A, putative	ExpAA=0.00 First60=0.00 PredHel=0 Topology=o	0					CYT		53.71	5.82			RTS_cys disintegrin |	1	coiled-coil domain-containing protein 64A, putative	0.0	gi|242000074	906	468	469	100	100	Ixodes scapularis	Bicaudal D-related protein homolog	5E-058	sp|Q8SWR2|BICRD_DROME	225	503	620	30	81	Drosophila melanogaster	HAP1_N	0.010	Spc7	0.41	SMC_prok_B	1E-006	SMC_prok_B 1e-006| Smc 3e-006| SMC_prok_A 1e-005| PRK11281 0.003| mukB 0.008| SbcC 0.030| HAP1_N 0.054| COG4942 | DUF3584 | GumC |	54	2	62
gi|242000064	gi|242000064	Ixodes scapularis	Eukaryota; Metazoa; Arthropoda; Chelicerata; Arachnida; Acari; Parasitiformes; Ixodida; Ixodoidea; Ixodidae; Ixodinae; Ixodes.	M	M	283	conserved hypothetical protein	ExpAA=7.81 First60=0.83 PredHel=0 Topology=o	0					SIG	20-21	33.093	8.91	30.789	8.92	VGD_cys disintegrin |	1	conserved hypothetical protein	1E-166	gi|242000064	588	282	283	100	100	Ixodes scapularis	Bacitracin synthase 3	3.9	sp|O68008|BACC_BACLI	32.3	77	6359	26	1	Bacillus licheniformis	DUF1389	1.2	VPS10	0.086	M20_ArgE_LysK	0.31	M20_ArgE_LysK | M20_dipept_like_DUG2_type | cbiO | PHA03235 | DUF1389 | PRK09984 | VPS10 |	55	2	63
gi|241999578	gi|241999578	Ixodes scapularis	Eukaryota; Metazoa; Arthropoda; Chelicerata; Arachnida; Acari; Parasitiformes; Ixodida; Ixodoidea; Ixodidae; Ixodinae; Ixodes.	L	L	789	thrombospondin, putative	ExpAA=0.00 First60=0.00 PredHel=0 Topology=o	0					CYT		85.583	4.28			RGD_cys disintegrin |VGD_cys disintegrin |ECD_cys disintegrin |	3	thrombospondin, putative	0.0	gi|241999578	1709	788	789	100	100	Ixodes scapularis	Cartilage oligomeric matrix protein	0.0	sp|P49747|COMP_HUMAN	908	720	757	59	95	Homo sapiens	TSP_C	1E-111	EGF_CA	4E-006	TSP_C	1E-110	TSP_C e-110| EGF_CA 6e-004| Nop14 0.003| EGF_CA 0.003| EGF_3 0.005| MDN1 0.060| IsdH_HarA 0.084| Herpes_LMP1 0.100| EGF | EGF |	56	2	64
gi|241999362	gi|241999362	Ixodes scapularis	Eukaryota; Metazoa; Arthropoda; Chelicerata; Arachnida; Acari; Parasitiformes; Ixodida; Ixodoidea; Ixodidae; Ixodinae; Ixodes.	K	K	299	tRNA guanosine-2'-O-methyltransferase trm13, putative	ExpAA=0.03 First60=0.00 PredHel=0 Topology=o	0					CYT		33.159	8.48			KTS_cys disintegrin |	1	tRNA guanosine-2'-O-methyltransferase trm13, putative	1E-170	gi|241999362	603	298	299	100	100	Ixodes scapularis	tRNA guanosine-2'-O-methyltransferase TRM13 homolog	6E-050	sp|Q8BYH3|TRM13_MOUSE	197	308	481	36	64	Mus musculus	TRM13	7E-049	DCD	1.4	TRM13	4E-048	TRM13 4e-048| Methyltransf_12 | DltE | GrpE | COG3421 | fadB | TIGR00266 | DUF3170 | PRK05082 | mukB |	57	2	65
gi|241999004	gi|241999004	Ixodes scapularis	Eukaryota; Metazoa; Arthropoda; Chelicerata; Arachnida; Acari; Parasitiformes; Ixodida; Ixodoidea; Ixodidae; Ixodinae; Ixodes.	M	M	491	serine proteinase inhibitor, putative	ExpAA=0.12 First60=0.12 PredHel=0 Topology=o	0					SIG	15-16	54.472	6.09	53.006	6	RTS_cys disintegrin |	1	serine proteinase inhibitor, putative	0.0	gi|241999004	1101	490	491	100	100	Ixodes scapularis	Papilin	2E-087	sp|Q868Z9|PPN_DROME	323	775	2898	34	27	Drosophila melanogaster	Kunitz_BPTI	2E-016	KU	3E-018	KU	4E-016	KU 4e-016| Kunitz_BPTI 9e-016| KU 6e-014| PLN03223 | uvrA | arCOG00543 | UvrA | uvra |	58	2	66
gi|241998824	gi|241998824	Ixodes scapularis	Eukaryota; Metazoa; Arthropoda; Chelicerata; Arachnida; Acari; Parasitiformes; Ixodida; Ixodoidea; Ixodidae; Ixodinae; Ixodes.	A	A	745	ankyrin repeat containing protein	ExpAA=0.01 First60=0.00 PredHel=0 Topology=o	0					CYT		81.909	5.68			RGD_cys disintegrin |	1	ankyrin repeat containing protein	0.0	gi|241998824	1506	744	745	100	100	Ixodes scapularis	Ankyrin repeat and BTB/POZ domain-containing protein 2	1E-139	sp|Q7TQI7|ABTB2_MOUSE	497	686	1024	41	67	Mus musculus	BTB	5E-021	BTB	4E-021	BTB	3E-020	BTB 3e-020| BTB 6e-019| ANK 9e-013| PHA03098 5e-012| Ank_2 3e-011| Arp 9e-009| PHA03100 2e-006| PHA02875 2e-005| PHA02713 3e-005| PHA03095 3e-004|	59	2	67
gi|241998746	gi|241998746	Ixodes scapularis	Eukaryota; Metazoa; Arthropoda; Chelicerata; Arachnida; Acari; Parasitiformes; Ixodida; Ixodoidea; Ixodidae; Ixodinae; Ixodes.	A	A	424	conserved hypothetical protein	ExpAA=20.34 First60=20.34 PredHel=1 Topology=i21-43o	1	5.2	89.9	5		BL	35-36	47.295	6.72	43.224	5.83	RTS_cys disintegrin |	1	conserved hypothetical protein	0.0	gi|241998746	862	423	424	100	100	Ixodes scapularis	UPF0672 protein C3orf58 homolog	2E-064	sp|B1H2T2|CC058_XENTR	246	421	429	37	98	Xenopus tropicalis	UPF0150	3.0	STI	0.18	PRK06501	0.66	PRK06501 | PRK08290 | C2A_MCTP_PRT | COG4927 | BMC_CcmK_like |	60	2	68
gi|241998684	gi|241998684	Ixodes scapularis	Eukaryota; Metazoa; Arthropoda; Chelicerata; Arachnida; Acari; Parasitiformes; Ixodida; Ixodoidea; Ixodidae; Ixodinae; Ixodes.	M	M	112	secreted protein, putative	ExpAA=0.90 First60=0.90 PredHel=0 Topology=o	0					SIG	20-21	11.852	8.18	9.701	8.29	KTS_cys disintegrin |	1	secreted protein, putative	2E-059	gi|241998684	231	111	112	100	100	Ixodes scapularis	Cyclin-D2-2	0.50	sp|Q8LHA8|CCD22_ORYSJ	33.1	63	356	27	18	Oryza sativa subsp. japonica	DUF1422	1.1	JHBP	0.19	PBP2_YofA_SoxR_	0.88	PBP2_YofA_SoxR_like | PRK12911 | BioB | PRK11056 | DUF1422 | threonine_DH_like | NUP | PsbN |	61	2	69
gi|241998408	gi|241998408	Ixodes scapularis	Eukaryota; Metazoa; Arthropoda; Chelicerata; Arachnida; Acari; Parasitiformes; Ixodida; Ixodoidea; Ixodidae; Ixodinae; Ixodes.	L	L	805	dipeptidyl-peptidase, putative	ExpAA=5.07 First60=0.00 PredHel=0 Topology=o	0					CYT		90.903	5.76			MLD_cys disintegrin |	1	dipeptidyl-peptidase, putative	0.0	gi|241998408	1665	804	805	100	100	Ixodes scapularis	Dipeptidyl peptidase 9	1E-147	sp|Q86TI2|DPP9_HUMAN	523	835	863	38	97	Homo sapiens	DPPIV_N	2E-050	53EXOc	0.26	DPPIV_N	1E-049	DPPIV_N 1e-049| DAP2 5e-025| Peptidase_S9 2e-015| Peptidase_S15 9e-005| COG2936 0.002| Pancreat_lipase_like 0.032| Chlorophyllase2 0.042| COG4188 | PRK14707 | COG0412 |	62	2	70
gi|241998242	gi|241998242	Ixodes scapularis	Eukaryota; Metazoa; Arthropoda; Chelicerata; Arachnida; Acari; Parasitiformes; Ixodida; Ixodoidea; Ixodidae; Ixodinae; Ixodes.	Q	Q	426	tetratricopeptide repeat protein, putative	ExpAA=0.01 First60=0.00 PredHel=0 Topology=o	0					CYT		47.643	8.4			KGD_cys disintegrin |	1	tetratricopeptide repeat protein, putative	0.0	gi|241998242	857	425	426	100	100	Ixodes scapularis	Tetratricopeptide repeat protein 5	9E-093	sp|Q5BK48|TTC5_RAT	340	412	440	42	94	Rattus norvegicus	TPR_2	0.071	TPR	0.020	TPR	1E-004	TPR 1e-004| PEP_TPR_lipo 0.015| COG4976 0.067| COG4235 | TPR_2 | PRK13704 | type_IV_pilW | TadD | LigT | PRK10626 |	63	2	71
gi|241997936	gi|241997936	Ixodes scapularis	Eukaryota; Metazoa; Arthropoda; Chelicerata; Arachnida; Acari; Parasitiformes; Ixodida; Ixodoidea; Ixodidae; Ixodinae; Ixodes.	M	M	324	conserved hypothetical protein	ExpAA=0.07 First60=0.01 PredHel=0 Topology=o	0					SIG	15-16	36.177	7.25	34.482	7.34	MLD_cys disintegrin |	1	conserved hypothetical protein	0.0	gi|241997936	693	323	324	100	100	Ixodes scapularis	tRNA wybutosine-synthesizing protein 2 homolog	2E-086	sp|Q4V8B8|TYW2_RAT	319	316	437	51	73	Rattus norvegicus	Met_10	6E-031	rADc	0.038	COG2520	4E-049	COG2520 4e-049| Met_10 3e-030| TrmA 3e-007| rumA 6e-005| PRK04338 3e-004| COG4123 0.002| fkbM_fam 0.003| AdoMet_MTases 0.003| RsmC 0.004| DNA_methylase 0.014|	64	2	72
gi|241997538	gi|241997538	Ixodes scapularis	Eukaryota; Metazoa; Arthropoda; Chelicerata; Arachnida; Acari; Parasitiformes; Ixodida; Ixodoidea; Ixodidae; Ixodinae; Ixodes.	Q	Q	2550	ubiquitin protein ligase edd, putative	ExpAA=0.02 First60=0.00 PredHel=0 Topology=o	0					CYT		278.902	5.71			RTS_cys disintegrin |	1	ubiquitin protein ligase edd, putative	0.0	gi|241997538	5142	2549	2550	100	100	Ixodes scapularis	E3 ubiquitin-protein ligase UBR5	0.0	sp|Q80TP3|UBR5_MOUSE	2226	2600	2792	48	93	Mus musculus	HECT	1E-069	HECTc	1E-103	HECTc	1E-101	HECTc e-101| HECTc 5e-071| HECT 8e-069| HUL4 4e-043| PolyA 5e-019| ZnF_UBR1 8e-019| PABP 2e-017| E3_UbLigase_EDD 7e-015| PABP-1234 2e-012| zf-UBR 4e-012|	65	2	73
gi|241997524	gi|241997524	Ixodes scapularis	Eukaryota; Metazoa; Arthropoda; Chelicerata; Arachnida; Acari; Parasitiformes; Ixodida; Ixodoidea; Ixodidae; Ixodinae; Ixodes.	K	K	1258	SMC protein, putative	ExpAA=0.05 First60=0.05 PredHel=0 Topology=o	0					CYT		146.299	8.75			RED_cys disintegrin |	1	SMC protein, putative	0.0	gi|241997524	2434	1257	1258	100	100	Ixodes scapularis	DNA repair protein RAD50	0.0	sp|P70388|RAD50_MOUSE	705	1306	1312	31	100	Mus musculus	SMC_N	5E-010	TOPEUc	2E-004	rad50	1E-144	rad50 e-144| ABC_Rad50 4e-031| SbcC 1e-018| Smc 5e-016| PRK02224 6e-013| SMC_prok_B 1e-010| SMC_prok_A 1e-009| PRK03918 1e-009| SMC_N 3e-009| PRK01156 5e-008|	66	2	74
gi|241997492	gi|241997492	Ixodes scapularis	Eukaryota; Metazoa; Arthropoda; Chelicerata; Arachnida; Acari; Parasitiformes; Ixodida; Ixodoidea; Ixodidae; Ixodinae; Ixodes.	P	P	714	exostosin-2, putative	ExpAA=23.19 First60=22.98 PredHel=1 Topology=i20-42o	1	3.1	94.1	2.8		SIG	37-38	81.102	8.56	77.514	8.32	RGD_cys disintegrin |	1	exostosin-2, putative	0.0	gi|241997492	1458	713	714	100	100	Ixodes scapularis	Exostosin-2	0.0	sp|O77783|EXT2_BOVIN	768	674	718	55	94	Bos taurus	Glyco_transf_64	9E-098	PGRP	2.3	Glyco_transf_64	5E-097	Glyco_transf_64 5e-097| Exostosin 5e-043| PLN02796 | ATH1 | COG2457 | /NonD | PRK14967 | Zn_ADH9 | FecB |	67	2	75
gi|241997432	gi|241997432	Ixodes scapularis	Eukaryota; Metazoa; Arthropoda; Chelicerata; Arachnida; Acari; Parasitiformes; Ixodida; Ixodoidea; Ixodidae; Ixodinae; Ixodes.	S	S	807	conserved hypothetical protein	ExpAA=0.00 First60=0.00 PredHel=0 Topology=o	0					CYT		87.251	9.83			KTS_cys disintegrin |	1	conserved hypothetical protein	0.0	gi|241997432	1544	806	807	100	100	Ixodes scapularis	Serine-rich adhesin for platelets	9E-018	sp|Q8VQ99|SRAP_STAAU	92.8	2147	2283	23	94	Staphylococcus aureus	Macoilin	0.017	DysFC	0.073	Macoilin	0.095	Macoilin 0.095| PRK13878 | TT_ORF1 | PHA03118 | U2AF_lg | Herpes_gp2 | ABCC_MRP_domain1 | PhnK | Circo_capsid | YL1 |	68	2	76
gi|241839950	gi|241839950	Ixodes scapularis	Eukaryota; Metazoa; Arthropoda; Chelicerata; Arachnida; Acari; Parasitiformes; Ixodida; Ixodoidea; Ixodidae; Ixodinae; Ixodes.	L	L	700	sidestep protein, putative	ExpAA=10.79 First60=0.01 PredHel=0 Topology=o	0					CYT		76.499	6.09			RGD_cys disintegrin |	1	sidestep protein, putative	0.0	gi|241839950	1433	699	700	100	100	Ixodes scapularis	Cell surface A33 antigen	0.002	sp|Q99795|GPA33_HUMAN	45.1	139	319	29	44	Homo sapiens	V-set	7E-005	IG_like	2E-005	V-set	4E-004	V-set 4e-004| IG_like 0.003| IG 0.003| COG4715 0.012| IgV_TCR_alpha_like 0.014| Ig1_PVR_like 0.026| Ig_LP_like 0.065| Ig_Versican | DUF1304 | Ig_MOG_like |	69	2	77
gi|241839568	gi|241839568	Ixodes scapularis	Eukaryota; Metazoa; Arthropoda; Chelicerata; Arachnida; Acari; Parasitiformes; Ixodida; Ixodoidea; Ixodidae; Ixodinae; Ixodes.	M	M	153	salivary gland 16 kD protein, putative	ExpAA=13.45 First60=13.45 PredHel=0 Topology=o	0					SIG	18-19	17.094	8.89	14.988	8.67	RED_cys disintegrin |	1	salivary gland 16 kD protein, putative	6E-087	gi|241839568	323	152	153	100	100	Ixodes scapularis	AF4/FMR2 family member 1	3.2	sp|O88573|AFF1_MOUSE	30.8	55	1217	25	5	Mus musculus	Salp15	8E-011	PKS_KR	2.6	Salp15	4E-010	Salp15 4e-010| HAD-SF-IIIC 0.037| DUF3584 | PRK13995 | SufC | ABC_FeS_Assembly |	4	24	6
gi|241837431	gi|241837431	Ixodes scapularis	Eukaryota; Metazoa; Arthropoda; Chelicerata; Arachnida; Acari; Parasitiformes; Ixodida; Ixodoidea; Ixodidae; Ixodinae; Ixodes.	G	G	52	hypothetical protein IscW_ISCW013848	ExpAA=0.00 First60=0.00 PredHel=0 Topology=i	0					CYT		6.017	4.65			RTS_cys disintegrin |	1	hypothetical protein IscW_ISCW013848	4E-028	gi|241837431	127	51	52	100	100	Ixodes scapularis	Hemocytin	6E-010	sp|P98092|HMCT_BOMMO	62.8	40	3133	53	1	Bombyx mori			LDLa	0.094				1	142	78
gi|241836591	gi|241836591	Ixodes scapularis	Eukaryota; Metazoa; Arthropoda; Chelicerata; Arachnida; Acari; Parasitiformes; Ixodida; Ixodoidea; Ixodidae; Ixodinae; Ixodes.	C	C	161	conserved hypothetical protein	ExpAA=27.16 First60=16.14 PredHel=0 Topology=o	0					CYT		19.267	9.87			RTS_cys disintegrin |	1	conserved hypothetical protein	2E-092	gi|241836591	341	160	161	100	100	Ixodes scapularis	Protein P	0.44	sp|Q69602|DPOL_HBVE1	33.9	112	842	30	13	Hepatitis B virus genotype E subtype ayw4 (isolate Kou)	DUF1872	0.040	UAS	4.8	DUF1872	0.19	DUF1872 | COG3459 | PIN_Smg6 |	70	2	79
gi|241711524	gi|241711524	Ixodes scapularis	Eukaryota; Metazoa; Arthropoda; Chelicerata; Arachnida; Acari; Parasitiformes; Ixodida; Ixodoidea; Ixodidae; Ixodinae; Ixodes.	M	M	472	conserved hypothetical protein	ExpAA=0.66 First60=0.66 PredHel=0 Topology=o	0					SIG	24-25	54.187	5.17	51.587	5.08	RTS_cys disintegrin |	1	conserved hypothetical protein	0.0	gi|241711524	988	471	472	100	100	Ixodes scapularis	Testican-3	2E-043	sp|Q8BKV0|TICN3_MOUSE	177	426	436	24	98	Mus musculus	SPARC_Ca_bdg	6E-019	TY	6E-013	SPARC_EC	2E-020	SPARC_EC 2e-020| SPARC_Ca_bdg 4e-018| TY 4e-012| TY 8e-011| Thyroglobulin_1 2e-010| KAZAL 5e-006| Kazal_2 2e-004| KAZAL_FS 0.001| Kazal_1 0.003| KAZAL_PSTI 0.009|	71	2	80
gi|241709159	gi|241709159	Ixodes scapularis	Eukaryota; Metazoa; Arthropoda; Chelicerata; Arachnida; Acari; Parasitiformes; Ixodida; Ixodoidea; Ixodidae; Ixodinae; Ixodes.	M	M	719	neprilysin, putative	ExpAA=24.95 First60=22.38 PredHel=1 Topology=i21-43o	1	3.1	94	2.9		BL	40-41	81.931	8.98	77.515	8.76	RGD_cys disintegrin |	1	neprilysin, putative	0.0	gi|241709159	1487	718	719	100	100	Ixodes scapularis	Endothelin-converting enzyme 1	5E-058	sp|P42893|ECE1_RAT	226	669	762	27	88	Rattus norvegicus	Peptidase_M13	9E-037	PhnA_Zn_Ribbon	2.4	M13	9E-096	M13 9e-096| PepO 1e-048| Peptidase_M13 5e-036| Peptidase_M13_N 3e-028| M4_neutral_protease 0.089| M4 | GluZincin | Peptidase_M4 | RGS-like | N1221 |	16	4	18
gi|241604621	gi|241604621	Ixodes scapularis	Eukaryota; Metazoa; Arthropoda; Chelicerata; Arachnida; Acari; Parasitiformes; Ixodida; Ixodoidea; Ixodidae; Ixodinae; Ixodes.	M	M	111	hypothetical protein IscW_ISCW010076	ExpAA=13.53 First60=13.53 PredHel=0 Topology=o	0					SIG	21-22	12.4	10.36	10.145	10.54	RGD_cys disintegrin |	1	hypothetical protein IscW_ISCW010076	3E-058	gi|241604621	228	110	111	100	100	Ixodes scapularis	RNA (guanine-9-)-methyltransferase domain-containing protein 2 homolog	0.23	sp|Q9VR56|RG9D2_DROME	34.3	62	319	36	20	Drosophila melanogaster	Zona_pellucida	1E-004	ZP	0.035	Zona_pellucida	5E-004	Zona_pellucida 5e-004| NAD_bind_2_malic_enz | PRK07761 | PLN02689 | ZP | PRK10929 | FeS_nifS | ccs1 |	72	2	81
gi|241148277	gi|241148277	Ixodes scapularis	Eukaryota; Metazoa; Arthropoda; Chelicerata; Arachnida; Acari; Parasitiformes; Ixodida; Ixodoidea; Ixodidae; Ixodinae; Ixodes.	A	A	103	hypothetical protein IscW_ISCW016870	ExpAA=0.00 First60=0.00 PredHel=0 Topology=o	0					CYT		12.094	9.8			KTS_cys disintegrin |	1	hypothetical protein IscW_ISCW016870	7E-055	gi|241148277	216	102	103	100	100	Ixodes scapularis	ATPase synthesis protein 25, mitochondrial	2.5	sp|B9WLD6|ATP25_CANDC	30.8	54	580	33	9	Candida dubliniensis (strain CD36 / CBS 7987 / NCPF 3949 / NRRL Y-17841)	LRR_2	1.4	TR_FER	0.97	OmpW	1.00	OmpW | PLN02889 | COG2433 | COG1306 | Q | LRR_2 | Attachment_P66 |	73	2	82
gi|241086517	gi|241086517	Ixodes scapularis	Eukaryota; Metazoa; Arthropoda; Chelicerata; Arachnida; Acari; Parasitiformes; Ixodida; Ixodoidea; Ixodidae; Ixodinae; Ixodes.	L	L	343	secreted inorganic pyrophosphatase, putative	ExpAA=0.02 First60=0.02 PredHel=0 Topology=o	0					CYT		38.797	6.09			KGD_cys disintegrin |	1	secreted inorganic pyrophosphatase, putative	0.0	gi|241086517	723	342	343	100	100	Ixodes scapularis	Inorganic pyrophosphatase	1E-106	sp|O77460|IPYR_DROME	383	286	338	60	85	Drosophila melanogaster	Pyrophosphatase	3E-054	TOP4c	0.37	PLN02707	9E-086	PLN02707 9e-086| Pyrophosphatase 1e-053| pyrophosphatase 2e-050| Ppa 5e-035| PLN02373 2e-012| PRK00642 1e-010| PRK02230 1e-007| PRK01250 8e-005| Lig | helD |	74	2	83
gi|241082061	gi|241082061	Ixodes scapularis	Eukaryota; Metazoa; Arthropoda; Chelicerata; Arachnida; Acari; Parasitiformes; Ixodida; Ixodoidea; Ixodidae; Ixodinae; Ixodes.	M	M	301	hypothetical protein IscW_ISCW015667	ExpAA=0.02 First60=0.02 PredHel=0 Topology=o	0					SIG	19-20	32.367	9.03	30.192	8.9	RGD_cys disintegrin |	1	hypothetical protein IscW_ISCW015667	1E-178	gi|241082061	629	300	301	100	100	Ixodes scapularis	Uncharacterized protein ZC84.1	8E-004	sp|Q03610|YN81_CAEEL	44.7	127	1561	25	8	Caenorhabditis elegans	EB	0.012	Amelogenin	4.3	EB	0.062	EB 0.062| Ig1_Necl-3 | ectoine_eutD | Ig | adenosine_kinase | PRK13700 | secoisolariciresinol-DH_like_SDR_c | COG4251 |	75	2	84
gi|240994921	gi|240994921	Ixodes scapularis	Eukaryota; Metazoa; Arthropoda; Chelicerata; Arachnida; Acari; Parasitiformes; Ixodida; Ixodoidea; Ixodidae; Ixodinae; Ixodes.	P	P	698	transcription elongation regulator, putative	ExpAA=0.00 First60=0.00 PredHel=0 Topology=o	0					CYT		80.715	9.2			RGD_cys disintegrin |	1	transcription elongation regulator, putative	0.0	gi|240994921	1408	697	698	100	100	Ixodes scapularis	Transcription elongation regulator 1	0.0	sp|Q8CGF7|TCRG1_MOUSE	635	997	1100	47	91	Mus musculus	FF	3E-009	FF	2E-007	FF	2E-008	FF 2e-008| PRP40 3e-005| FF 3e-005| WW 2e-004| WW 2e-004| WW 5e-004| PRK07764 0.005| PRESAC 0.012| SbcC 0.032| PRK07003 0.041|	76	2	85
gi|240994863	gi|240994863	Ixodes scapularis	Eukaryota; Metazoa; Arthropoda; Chelicerata; Arachnida; Acari; Parasitiformes; Ixodida; Ixodoidea; Ixodidae; Ixodinae; Ixodes.	L	L	240	hypothetical protein IscW_ISCW024070	ExpAA=19.84 First60=15.37 PredHel=0 Topology=o	0					CYT		27.271	9.02			RTS_cys disintegrin |	1	hypothetical protein IscW_ISCW024070	1E-133	gi|240994863	477	239	240	100	100	Ixodes scapularis	Probable transposase for insertion sequence element IS702	0.46	sp|Q00462|T702_FREDI	35	134	276	25	49	Fremyella diplosiphon	Mt_ATP-synt_D	1.2	AICARFT_IMPCHas	1.9	CSE1	0.29	CSE1 | bchD | Mt_ATP-synt_D | Paf67 | PRK07505 | PRK13327 |	77	2	86
gi|241862486	gi|241862486	Ixodes scapularis	Eukaryota; Metazoa; Arthropoda; Chelicerata; Arachnida; Acari; Parasitiformes; Ixodida; Ixodoidea; Ixodidae; Ixodinae; Ixodes.	Q	Q	227	glutathione S-transferase, putative	ExpAA=0.27 First60=0.27 PredHel=0 Topology=o	0					SIG	16-17	25.83	6.93	23.79	6.93	VGD_cys disintegrin |	1	glutathione S-transferase, putative	1E-126	gi|241862486	454	226	227	100	100	Ixodes scapularis	Maleylacetoacetate isomerase	3E-068	sp|Q9WVL0|MAAI_MOUSE	258	210	216	60	98	Mus musculus	GST_N	1E-012	GLECT	0.17	maiA	8E-085	maiA 8e-085| GST_C_Zeta 2e-042| Gst 1e-032| GST_N_Zeta 2e-028| GST_N_family 2e-015| GST_N_4 3e-014| PRK15113 1e-013| GST_N_Phi 2e-013| GST_N_GTT1_like 2e-012| GST_N 8e-012|	78	2	87
gi|241861730	gi|241861730	Ixodes scapularis	Eukaryota; Metazoa; Arthropoda; Chelicerata; Arachnida; Acari; Parasitiformes; Ixodida; Ixodoidea; Ixodidae; Ixodinae; Ixodes.	L	L	1018	hypothetical protein IscW_ISCW014234	ExpAA=0.32 First60=0.00 PredHel=0 Topology=o	0					CYT		110.693	6.91			RTS_cys disintegrin |	1	hypothetical protein IscW_ISCW014234	0.0	gi|241861730	2024	1017	1018	100	100	Ixodes scapularis	Protein FAM135A	1E-109	sp|Q9P2D6|F135A_HUMAN	395	1460	1515	48	96	Homo sapiens	DUF676	5E-053	Amelogenin	0.011	DUF676	3E-052	DUF676 3e-052| DUF3657 2e-014| Abhydrolase_6 2e-004| PHA03307 3e-004| PGAP1 0.009| DUF729 0.026| DUF915 0.046| 2A1904 | OpcA | PRK07764 |	79	2	88
gi|241861613	gi|241861613	Ixodes scapularis	Eukaryota; Metazoa; Arthropoda; Chelicerata; Arachnida; Acari; Parasitiformes; Ixodida; Ixodoidea; Ixodidae; Ixodinae; Ixodes.	D	D	278	BTB/POZ domain-containing protein, putative	ExpAA=0.33 First60=0.22 PredHel=0 Topology=o	0					CYT		31.879	6.6			RGD_cys disintegrin |	1	BTB/POZ domain-containing protein, putative	1E-161	gi|241861613	572	277	278	100	100	Ixodes scapularis	BTB/POZ domain-containing protein 10	1E-104	sp|Q5R585|BTBDA_PONAB	376	262	475	69	55	Pongo abelii	DUF3821	0.22	Glyco_32	0.13	DUF3821	1.1	DUF3821 | M14_CP_N-E_like | COG2985 | GRX_GRXb_1_3_like | PTZ00063 | spore_lon_C | FGE-sulfatase | PRK09814 | BAR_APPL1 | M14_CPD_I |	80	2	89
gi|241860943	gi|241860943	Ixodes scapularis	Eukaryota; Metazoa; Arthropoda; Chelicerata; Arachnida; Acari; Parasitiformes; Ixodida; Ixodoidea; Ixodidae; Ixodinae; Ixodes.	C	C	641	neprilysin, putative	ExpAA=0.84 First60=0.00 PredHel=0 Topology=o	0					CYT		73.14	8.85			KGD_cys disintegrin |RTS_cys disintegrin |	2	neprilysin, putative	0.0	gi|241860943	1303	640	641	100	100	Ixodes scapularis	Endothelin-converting enzyme 1	4E-047	sp|P42893|ECE1_RAT	189	669	762	23	88	Rattus norvegicus	Peptidase_M13_N	4E-026	GatB_Yqey	0.96	M13	5E-054	M13 5e-054| PepO 5e-028| Peptidase_M13_N 2e-025| Peptidase_M13 5e-021| PHA03362 | spore_ytvI | PsaA_PsaB | cysN | cas_MJ1666 | PRK14940 |	16	4	18
gi|241859419	gi|241859419	Ixodes scapularis	Eukaryota; Metazoa; Arthropoda; Chelicerata; Arachnida; Acari; Parasitiformes; Ixodida; Ixodoidea; Ixodidae; Ixodinae; Ixodes.	M	M	150	secreted protein, putative	ExpAA=0.03 First60=0.03 PredHel=0 Topology=o	0					SIG	23-24	16.217	6.28	13.944	5.56	KGD_cys disintegrin |	1	secreted protein, putative	4E-079	gi|241859419	297	149	150	100	100	Ixodes scapularis	Glutaredoxin-related protein 5, mitochondrial	2E-040	sp|Q80Y14|GLRX5_MOUSE	164	106	152	71	70	Mus musculus	Glutaredoxin	2E-019	MA	0.37	GRX_PICOT_like	9E-041	GRX_PICOT_like 9e-041| TIGR00365 1e-039| COG0278 2e-035| PTZ00062 8e-026| PRK10824 6e-022| GRX_family 2e-021| Glutaredoxin 9e-019| GRX_GRXh_1_2_like 2e-010| GRX_bact 9e-009| GRX_GRX_like 2e-008|	81	2	90
gi|241859185	gi|241859185	Ixodes scapularis	Eukaryota; Metazoa; Arthropoda; Chelicerata; Arachnida; Acari; Parasitiformes; Ixodida; Ixodoidea; Ixodidae; Ixodinae; Ixodes.	M	M	175	hypothetical protein IscW_ISCW023063	ExpAA=23.90 First60=21.71 PredHel=1 Topology=o15-37i	1	12.6	8.6	78.9		BL	30-31	20.601	9.99	17.015	10.26	VGD_cys disintegrin |	1	hypothetical protein IscW_ISCW023063	1E-104	gi|241859185	380	174	175	100	100	Ixodes scapularis	Putative uncharacterized protein YPL238C	4.6	sp|Q99401|YP238_YEAST	30.8	74	129	28	58	Saccharomyces cerevisiae (strain ATCC 204508 / S288c)	YopE_N	0.62	RIBOc	1.2	PRK10309	0.38	PRK10309 | NorD | PRK14994 | ND4 | YopE_N | PRK07487 | DUF1853 | PLN02877 | DUF3165 | ClC_1_like |	82	2	91
gi|241859179	gi|241859179	Ixodes scapularis	Eukaryota; Metazoa; Arthropoda; Chelicerata; Arachnida; Acari; Parasitiformes; Ixodida; Ixodoidea; Ixodidae; Ixodinae; Ixodes.	M	M	1376	hypothetical protein IscW_ISCW023058	ExpAA=1.90 First60=0.34 PredHel=0 Topology=o	0					SIG	22-23	149.802	8.71	147.61	8.76	VGD_cys disintegrin |	1	hypothetical protein IscW_ISCW023058	0.0	gi|241859179	2735	1375	1376	100	100	Ixodes scapularis	Protein TSPEAR	0.045	sp|Q8WU66|TSEAR_HUMAN	41.6	144	669	24	22	Homo sapiens	EPTP	0.66	SMR	0.18	GalA	0.24	GalA | COG1574 | PRK10695 | PRK04132 | PRK07487 | T7SS_EccC_b | EPTP | PRK14692 | PRK07867 | PRK14275 |	83	2	92
gi|241855779	gi|241855779	Ixodes scapularis	Eukaryota; Metazoa; Arthropoda; Chelicerata; Arachnida; Acari; Parasitiformes; Ixodida; Ixodoidea; Ixodidae; Ixodinae; Ixodes.	R	R	473	tyrosine aminotransferase, putative	ExpAA=0.12 First60=0.01 PredHel=0 Topology=o	0					CYT		51.966	7.66			KGD_cys disintegrin |	1	tyrosine aminotransferase, putative	0.0	gi|241855779	950	472	473	100	100	Ixodes scapularis	Alanine aminotransferase 2	1E-153	sp|Q6GM82|ALAT2_XENLA	541	462	540	59	86	Xenopus laevis	Aminotran_1_2	2E-023	PB1	0.22	PTZ00377	1E-177	PTZ00377 e-177| PLN02231 e-129| PLN02368 e-118| COG0436 4e-043| AAT_like 4e-039| PRK09265 7e-034| PRK08363 3e-030| PRK06855 8e-030| tyr_nico_aTase 2e-026| PRK13355 2e-024|	84	2	93
gi|241855771	gi|241855771	Ixodes scapularis	Eukaryota; Metazoa; Arthropoda; Chelicerata; Arachnida; Acari; Parasitiformes; Ixodida; Ixodoidea; Ixodidae; Ixodinae; Ixodes.	T	T	352	hypothetical protein IscW_ISCW013612	ExpAA=0.09 First60=0.02 PredHel=0 Topology=o	0					CYT		38.783	7.9			RTS_cys disintegrin |	1	hypothetical protein IscW_ISCW013612	0.0	gi|241855771	734	351	352	100	100	Ixodes scapularis	F-box only protein 22	1E-009	sp|Q78JE5|FBX22_MOUSE	64.7	341	402	23	85	Mus musculus	F-box	0.34	FBOX	0.065	anch_rpt_perm	0.60	anch_rpt_perm | dot_icm_DotB | F-box | F-box-like | PRK09795 | FBOX | PRK12862 | PRK12582 |	85	2	94
gi|241854325	gi|241854325	Ixodes scapularis	Eukaryota; Metazoa; Arthropoda; Chelicerata; Arachnida; Acari; Parasitiformes; Ixodida; Ixodoidea; Ixodidae; Ixodinae; Ixodes.	T	T	311	conserved hypothetical protein	ExpAA=0.93 First60=0.00 PredHel=0 Topology=o	0					CYT		34.925	7.86			KGD_cys disintegrin |	1	conserved hypothetical protein	0.0	gi|241854325	644	310	311	100	100	Ixodes scapularis	Nucleolar protein 6	7.7	sp|Q8R5K4|NOL6_MOUSE	31.6	105	1152	22	9	Mus musculus	F-box	3.7	IL1	4.0	PRK10555	6.2	PRK10555 | PTZ00257 |	86	2	95
gi|241853680	gi|241853680	Ixodes scapularis	Eukaryota; Metazoa; Arthropoda; Chelicerata; Arachnida; Acari; Parasitiformes; Ixodida; Ixodoidea; Ixodidae; Ixodinae; Ixodes.	R	R	142	hypothetical protein IscW_ISCW023365	ExpAA=0.00 First60=0.00 PredHel=0 Topology=o	0					CYT		16.076	11.31			RTS_cys disintegrin |	1	hypothetical protein IscW_ISCW023365	1E-081	gi|241853680	305	141	142	100	100	Ixodes scapularis	MADS-box transcription factor pvg4	0.007	sp|Q9HGP0|PVG4_SCHPO	39.3	101	372	25	27	Schizosaccharomyces pombe (strain ATCC 38366 / 972)	Endostatin	0.67	AgrB	1.8	hofQ	1.4	hofQ | PLN03046 | Endostatin | PolY_Pol_iota | PLN03001 | TFIIA | PAT1 |	87	2	96
gi|241853666	gi|241853666	Ixodes scapularis	Eukaryota; Metazoa; Arthropoda; Chelicerata; Arachnida; Acari; Parasitiformes; Ixodida; Ixodoidea; Ixodidae; Ixodinae; Ixodes.	V	V	810	DNA replication licensing factor, putative	ExpAA=0.01 First60=0.00 PredHel=0 Topology=o	0					CYT		90.971	6.23			RGD_cys disintegrin |	1	DNA replication licensing factor, putative	0.0	gi|241853666	1614	809	810	100	100	Ixodes scapularis	Zygotic DNA replication licensing factor mcm3	0.0	sp|Q7ZXZ0|MCM3Z_XENLA	993	797	806	65	99	Xenopus laevis	MCM	1E-130	MCM	0.0	MCM	0.0	MCM | MCM2 e-146| MCM e-129| PTZ00111 2e-068| COG0714 3e-008| ChlI 3e-006| Mg_chelatase 0.001| COG0606 0.002| AAA_5 0.003| bchI 0.011|	88	2	97
gi|241853043	gi|241853043	Ixodes scapularis	Eukaryota; Metazoa; Arthropoda; Chelicerata; Arachnida; Acari; Parasitiformes; Ixodida; Ixodoidea; Ixodidae; Ixodinae; Ixodes.	M	M	826	granulin, putative	ExpAA=0.45 First60=0.45 PredHel=0 Topology=o	0					SIG	19-20	88.13	5.82	86.235	5.88	ECD_cys disintegrin |	1	granulin, putative	0.0	gi|241853043	1852	825	826	100	100	Ixodes scapularis	Granulins	1E-129	sp|P28799|GRN_HUMAN	464	583	593	39	98	Homo sapiens	Granulin	1E-008	GRAN	2E-010	GRAN	3E-008	GRAN 3e-008| Granulin 6e-008| PLN02719 | Med25 | glpA |	8	8	98
gi|241851527	gi|241851527	Ixodes scapularis	Eukaryota; Metazoa; Arthropoda; Chelicerata; Arachnida; Acari; Parasitiformes; Ixodida; Ixodoidea; Ixodidae; Ixodinae; Ixodes.	M	M	268	hypothetical protein IscW_ISCW023050	ExpAA=12.23 First60=12.14 PredHel=0 Topology=o	0					SIG	22-23	28.524	5.67	26.226	5.39	VGD_cys disintegrin |	1	hypothetical protein IscW_ISCW023050	1E-152	gi|241851527	541	267	268	100	100	Ixodes scapularis	Nephrin	0.003	sp|O60500|NPHN_HUMAN	42.7	127	1241	28	10	Homo sapiens	Calsequestrin	0.001	IG_like	0.003	PLN02674	0.001	PLN02674 0.001| Calsequestrin 0.007| IG_like | IG | PRK13808 | RecO | ADK | PDI_b'_Calsequestrin_C | adk | PRK14532 |	89	2	99
gi|241849268	gi|241849268	Ixodes scapularis	Eukaryota; Metazoa; Arthropoda; Chelicerata; Arachnida; Acari; Parasitiformes; Ixodida; Ixodoidea; Ixodidae; Ixodinae; Ixodes.	R	R	386	rassf, putative	ExpAA=0.06 First60=0.00 PredHel=0 Topology=o	0					CYT		44.3	8.07			KTS_cys disintegrin |	1	rassf, putative	0.0	gi|241849268	785	385	386	100	100	Ixodes scapularis	Ras association domain-containing protein 4	3E-044	sp|Q9H2L5|RASF4_HUMAN	179	274	321	34	86	Homo sapiens	RA	8E-011	RA	4E-010	rasfadin_RA	5E-025	rasfadin_RA 5e-025| LIM_TLP_like 2e-019| LIM_CRIP 7e-014| LIM1_TLP 5e-012| LIM2_TLP 2e-011| LIM 1e-010| RA 4e-010| LIM 1e-009| LIM_CRP_like 4e-009| RA 7e-009|	90	2	100
gi|241845573	gi|241845573	Ixodes scapularis	Eukaryota; Metazoa; Arthropoda; Chelicerata; Arachnida; Acari; Parasitiformes; Ixodida; Ixodoidea; Ixodidae; Ixodinae; Ixodes.	L	L	464	tak1, putative	ExpAA=0.51 First60=0.51 PredHel=0 Topology=o	0					CYT		51.093	6.96			RTS_cys disintegrin |	1	tak1, putative	0.0	gi|241845573	964	463	464	100	100	Ixodes scapularis	Mitogen-activated protein kinase kinase kinase 7	8E-071	sp|Q62073|M3K7_MOUSE	268	452	579	38	78	Mus musculus	Pkinase	2E-028	S_TKc	1E-029	Pkinase	1E-027	Pkinase 1e-027| S_TKc 2e-027| PKc 2e-027| TyrKc 6e-023| STKc_MAPKKK 1e-021| PTKc 3e-021| STYKc 4e-021| PKc_STE 5e-021| Pkinase_Tyr 3e-020| STKc_Yank1 6e-019|	91	2	101
gi|241843688	gi|241843688	Ixodes scapularis	Eukaryota; Metazoa; Arthropoda; Chelicerata; Arachnida; Acari; Parasitiformes; Ixodida; Ixodoidea; Ixodidae; Ixodinae; Ixodes.	M	M	81	secreted protein, putative	ExpAA=0.71 First60=0.71 PredHel=0 Topology=o	0					SIG	18-19	8.901	4.61	6.85	4.61	RTS_cys disintegrin |	1	secreted protein, putative	1E-043	gi|241843688	179	80	81	100	100	Ixodes scapularis	BPTI/Kunitz domain-containing protein (Fragment)	0.012	sp|P86733|KCP_HALAI	38.5	55	126	35	44	Haliotis asinina	Kunitz_BPTI	0.014	KU	0.046	Kunitz_BPTI	0.064	Kunitz_BPTI 0.064| KU | DDE_Tnp_ISAZ013 | PHA03309 | MDN1 | 2A0112 | KU | PRK15109 |	1	142	5
gi|241841429	gi|241841429	Ixodes scapularis	Eukaryota; Metazoa; Arthropoda; Chelicerata; Arachnida; Acari; Parasitiformes; Ixodida; Ixodoidea; Ixodidae; Ixodinae; Ixodes.	M	M	478	acetyl-CoA hydrolase, putative	ExpAA=0.02 First60=0.00 PredHel=0 Topology=o	0					BL	17-18	51.8	8.47	49.962	7.93	MLD_cys disintegrin |	1	acetyl-CoA hydrolase, putative	0.0	gi|241841429	976	477	478	100	100	Ixodes scapularis	4-hydroxybutyrate coenzyme A transferase	1E-102	sp|P38942|CAT2_CLOK5	372	414	429	48	97	Clostridium kluyveri (strain ATCC 8527 / DSM 555 / NCIMB 10680)	AcetylCoA_hydro	2E-020	Asparaginase	0.11	ACH1	4E-077	ACH1 4e-077| butyr_acet_CoA 3e-069| YgfH_subfam 4e-033| AcetylCoA_hydro 8e-020| PRK10906 0.081| pcaJ_scoB_fam 0.086| AtoA | AtoD | GlpR | MDR8 |	92	2	102
gi|241833983	gi|241833983	Ixodes scapularis	Eukaryota; Metazoa; Arthropoda; Chelicerata; Arachnida; Acari; Parasitiformes; Ixodida; Ixodoidea; Ixodidae; Ixodinae; Ixodes.	M	M	235	secreted salivary gland peptide, putative	ExpAA=0.02 First60=0.02 PredHel=0 Topology=o	0					SIG	18-19	25.483	7.49	23.716	7.13	VGD_cys disintegrin |	1	secreted salivary gland peptide, putative	1E-134	gi|241833983	480	234	235	100	100	Ixodes scapularis	Protein CYR61	2.2	sp|P18406|CYR61_MOUSE	32.7	74	379	33	20	Mus musculus	DUF1397	0.74	DYNc	2.3	PRK06828	0.33	PRK06828 | 7 | PRK13560 | DUF1397 | NR_LBD_NGFI-B | NR_LBD_Nurr1 |	17	4	19
gi|241830636	gi|241830636	Ixodes scapularis	Eukaryota; Metazoa; Arthropoda; Chelicerata; Arachnida; Acari; Parasitiformes; Ixodida; Ixodoidea; Ixodidae; Ixodinae; Ixodes.	M	M	247	cement protein RIM36, putative	ExpAA=17.28 First60=15.47 PredHel=0 Topology=o	0					SIG	43-44	26.557	10.11	21.899	9.95	RTS_cys disintegrin |	1	cement protein RIM36, putative	1E-154	gi|241830636	548	246	247	100	100	Ixodes scapularis	Zinc finger protein 512B	5E-014	sp|Q96KM6|Z512B_HUMAN	78.2	161	892	36	18	Homo sapiens	Gly_rich	4E-007	PRP	4E-005	COG4371	3E-007	COG4371 3e-007| COG1512 5e-007| PTZ00146 1e-006| PRK07772 1e-006| III 1e-006| Gly_rich 2e-006| GRP 4e-006| PRK06958 1e-005| PLN03138 2e-005| PRK14277 3e-005|	29	3	103
gi|241830535	gi|241830535	Ixodes scapularis	Eukaryota; Metazoa; Arthropoda; Chelicerata; Arachnida; Acari; Parasitiformes; Ixodida; Ixodoidea; Ixodidae; Ixodinae; Ixodes.	L	L	817	DNA ligase IV, putative	ExpAA=0.00 First60=0.00 PredHel=0 Topology=o	0					CYT		90.734	8.59			RED_cys disintegrin |	1	DNA ligase IV, putative	0.0	gi|241830535	1637	816	817	100	100	Ixodes scapularis	DNA ligase 4	1E-177	sp|Q90YB1|DNLI4_CHICK	622	783	912	40	86	Gallus gallus	DNA_ligase_A_M	5E-042	BRCT	6E-005	dnl1	2E-099	dnl1 2e-099| Adenylation_DNA_ligase_IV 4e-084| PRK01109 4e-061| OBF_DNA_ligase_IV 8e-057| CDC9 1e-051| PLN03113 1e-041| DNA_ligase_A_M 3e-041| Adenylation_DNA_ligase 7e-039| Adenylation_DNA_ligase_Arch_LigB 1e-035| ligB 7e-034|	93	2	104
gi|241829811	gi|241829811	Ixodes scapularis	Eukaryota; Metazoa; Arthropoda; Chelicerata; Arachnida; Acari; Parasitiformes; Ixodida; Ixodoidea; Ixodidae; Ixodinae; Ixodes.	M	M	184	salivary lipid interacting protein, putative	ExpAA=9.39 First60=9.37 PredHel=0 Topology=o	0					SIG	27-28	20.394	8.68	17.649	8.24	KGD_cys disintegrin |	1	salivary lipid interacting protein, putative	1E-103	gi|241829811	379	183	184	100	100	Ixodes scapularis	Ecdysteroid-regulated 16 kDa protein	0.032	sp|Q25481|ES16_MANSE	38.1	100	145	23	70	Manduca sexta	E1_DerP2_DerF2	3E-010	ML	2E-009	E1_DerP2_DerF2	1E-009	E1_DerP2_DerF2 1e-009| ML 2e-007| Npc2_like 4e-006| PRK02463 | H2MP_like-2 | HpaB-2 | SPC12 | PRK06556 | TIGR00276 |	94	2	105
gi|241818160	gi|241818160	Ixodes scapularis	Eukaryota; Metazoa; Arthropoda; Chelicerata; Arachnida; Acari; Parasitiformes; Ixodida; Ixodoidea; Ixodidae; Ixodinae; Ixodes.	M	M	125	hypothetical protein IscW_ISCW015135	ExpAA=0.49 First60=0.49 PredHel=0 Topology=o	0					SIG	22-23	13.291	4.65	11.062	4.45	ECD_cys disintegrin |	1	hypothetical protein IscW_ISCW015135	6E-070	gi|241818160	266	124	125	100	100	Ixodes scapularis	Connective tissue growth factor	3E-004	sp|Q9R1E9|CTGF_RAT	43.9	93	347	30	27	Rattus norvegicus	VESA1_N	0.082	IB	1.6	peroxinectin_li	0.11	peroxinectin_like_bacterial | VESA1_N | DUF2479 | PLN02721 | PRK07219 | PTKc_Yes | PTKc_Fyn_Yrk | ICDH_alpha | PolC_DP2 | PRK14964 |	1	142	106
gi|241816094	gi|241816094	Ixodes scapularis	Eukaryota; Metazoa; Arthropoda; Chelicerata; Arachnida; Acari; Parasitiformes; Ixodida; Ixodoidea; Ixodidae; Ixodinae; Ixodes.	M	M	235	secreted protein, putative	ExpAA=5.75 First60=1.00 PredHel=0 Topology=o	0					SIG	20-21	24.173	4.23	21.945	4.23	VGD_cys disintegrin |	1	secreted protein, putative	1E-128	gi|241816094	461	234	235	100	100	Ixodes scapularis	Protein Plunc	0.98	sp|Q5XW65|PLUNC_PIG	33.9	178	249	29	72	Sus scrofa	Chlorosome_CsmC	0.76	rADc	0.50	omega_3_PfaA	0.14	omega_3_PfaA | Chlorosome_CsmC | GvpH | ksgA | asnASE_I |	18	4	20
gi|241814076	gi|241814076	Ixodes scapularis	Eukaryota; Metazoa; Arthropoda; Chelicerata; Arachnida; Acari; Parasitiformes; Ixodida; Ixodoidea; Ixodidae; Ixodinae; Ixodes.	I	I	776	low-density lipoprotein receptor, putative	ExpAA=0.05 First60=0.04 PredHel=0 Topology=o	0					CYT		86.691	5.68			RED_cys disintegrin |	1	low-density lipoprotein receptor, putative	0.0	gi|241814076	1610	775	776	100	100	Ixodes scapularis	Low-density lipoprotein receptor-related protein 6	0.0	sp|O88572|LRP6_MOUSE	954	1224	1613	58	76	Mus musculus	Ldl_recept_b	2E-008	LY	7E-012	LY	9E-010	LY 9e-010| Ldl_recept_b 1e-007| COG3391 3e-004| COG3386 0.039| NTNH_C | GlgB | PLN02919 | EGF | vWA_Matrilin | PRK12769 |	95	2	107
gi|241813409	gi|241813409	Ixodes scapularis	Eukaryota; Metazoa; Arthropoda; Chelicerata; Arachnida; Acari; Parasitiformes; Ixodida; Ixodoidea; Ixodidae; Ixodinae; Ixodes.	M	M	370	NADH:ubiquinone oxidoreductase, NDUFA9/39kDa subunit, putative	ExpAA=0.16 First60=0.00 PredHel=0 Topology=o	0					BL	18-19	40.342	10.54	38.491	10.46	RGD_cys disintegrin |	1	NADH:ubiquinone oxidoreductase, NDUFA9/39kDa subunit, putative	0.0	gi|241813409	749	369	370	100	100	Ixodes scapularis	NADH dehydrogenase	2E-045	sp|Q5BK63|NDUA9_RAT	183	197	377	46	53	Rattus norvegicus	RmlD_sub_bind	8E-007	PRP	0.003	NDUFA9_like_SDR	6E-057	NDUFA9_like_SDR_a 6e-057| SDR_e_a 4e-016| dTDP_HR_like_SDR_e 2e-008| RfbD 2e-006| RmlD_sub_bind 5e-006| SDR_a5 4e-005| WcaG 4e-005| AR_FR_like_1_SDR_e 7e-005| 3b-HSD-NSDHL-like_SDR_e 8e-004| Epimerase 0.001|	96	2	108
gi|241813099	gi|241813099	Ixodes scapularis	Eukaryota; Metazoa; Arthropoda; Chelicerata; Arachnida; Acari; Parasitiformes; Ixodida; Ixodoidea; Ixodidae; Ixodinae; Ixodes.	L	L	176	hypothetical protein IscW_ISCW023855	ExpAA=1.50 First60=1.33 PredHel=0 Topology=o	0					CYT		18.821	9.41			RTS_cys disintegrin |	1	hypothetical protein IscW_ISCW023855	4E-099	gi|241813099	363	175	176	100	100	Ixodes scapularis	Usherin	2E-005	sp|O75445|USH2A_HUMAN	48.9	3508	5202	31	67	Homo sapiens	fn3	0.029	FN3	8E-005	FN3	2E-005	FN3 2e-005| FN3 0.008| fn3 | COG3522 | PRK09294 | Nckap1 | PRK09751 | PRK14507 | PGM_like3 | Rep_fac-A_C |	97	2	109
gi|241813077	gi|241813077	Ixodes scapularis	Eukaryota; Metazoa; Arthropoda; Chelicerata; Arachnida; Acari; Parasitiformes; Ixodida; Ixodoidea; Ixodidae; Ixodinae; Ixodes.	T	T	62	hypothetical protein IscW_ISCW014924	ExpAA=0.14 First60=0.14 PredHel=0 Topology=o	0					CYT		7.192	9.92			RTS_cys disintegrin |	1	hypothetical protein IscW_ISCW014924	4E-028	gi|241813077	127	61	62	100	100	Ixodes scapularis	FERM domain-containing protein C	9.7	sp|P0CD60|FRMC_DICDI	28.9	34	1489	40	2	Dictyostelium discoideum	VKG_Carbox	7.1	INB	4.6	glycerol_kin	5.5	glycerol_kin | PTZ00294 |	19	4	110
gi|241812767	gi|241812767	Ixodes scapularis	Eukaryota; Metazoa; Arthropoda; Chelicerata; Arachnida; Acari; Parasitiformes; Ixodida; Ixodoidea; Ixodidae; Ixodinae; Ixodes.	V	V	148	conserved hypothetical protein	ExpAA=0.19 First60=0.19 PredHel=0 Topology=o	0					CYT		16.293	6.09			RTS_cys disintegrin |	1	conserved hypothetical protein	1E-081	gi|241812767	305	147	148	100	100	Ixodes scapularis	tRNA pseudouridine synthase B	0.60	sp|Q39H28|TRUB_BURS3	33.1	80	322	33	25	Burkholderia sp. (strain 383)	Glyco_hydro_101	1.5	Spc7	0.89	15	1.5	15 | COG4715 | GMP_reduct_1 | COG3181 | C2A_Ferlin | GlxB | PRK07229 | Glyco_hydro_101 | PHA03210 | DUF2776 |	98	2	111
gi|241811703	gi|241811703	Ixodes scapularis	Eukaryota; Metazoa; Arthropoda; Chelicerata; Arachnida; Acari; Parasitiformes; Ixodida; Ixodoidea; Ixodidae; Ixodinae; Ixodes.	L	L	155	lim homeobox protein, putative	ExpAA=0.10 First60=0.10 PredHel=0 Topology=o	0					CYT		17.418	10.12			KGD_cys disintegrin |	1	lim homeobox protein, putative	5E-085	gi|241811703	317	154	155	100	100	Ixodes scapularis	LIM homeobox transcription factor 1-beta.1	1E-047	sp|Q8UVR3|LMX1B_XENLA	188	228	400	54	57	Xenopus laevis	Homeobox	4E-014	HOX	3E-015	LIM2_Lhx2_Lhx9	3E-018	LIM2_Lhx2_Lhx9 3e-018| LIM2_Lmx1a_Lmx1b 3e-018| Homeobox 2e-013| LIM 2e-013| HOX 3e-013| LIM2_Lhx3_Lhx4 8e-013| LIM2_LMO4 1e-012| LIM2_Lhx1_Lhx5 1e-011| LIM2_Isl 2e-011| homeodomain 2e-011|	99	2	112
gi|241802506	gi|241802506	Ixodes scapularis	Eukaryota; Metazoa; Arthropoda; Chelicerata; Arachnida; Acari; Parasitiformes; Ixodida; Ixodoidea; Ixodidae; Ixodinae; Ixodes.	M	M	217	hypothetical protein IscW_ISCW023167	ExpAA=14.17 First60=14.16 PredHel=0 Topology=o	0					SIG	23-24	23.387	5.4	21.063	5.11	KTS_cys disintegrin |	1	hypothetical protein IscW_ISCW023167	1E-124	gi|241802506	447	216	217	100	100	Ixodes scapularis	50S ribosomal protein L25	3.2	sp|Q5QV04|RL25_IDILO	32	92	221	28	42	Idiomarina loihiensis	DUF1485	2.8	MBT	0.69	rSAM_for_selen	3.0	rSAM_for_selen | PLN02706 | RsmC | PRK05290 | rsmC |	17	4	19
gi|241785982	gi|241785982	Ixodes scapularis	Eukaryota; Metazoa; Arthropoda; Chelicerata; Arachnida; Acari; Parasitiformes; Ixodida; Ixodoidea; Ixodidae; Ixodinae; Ixodes.	V	V	492	serine/threonine protein kinase, putative	ExpAA=5.93 First60=1.55 PredHel=0 Topology=o	0					CYT		55.283	9.13			RTS_cys disintegrin |	1	serine/threonine protein kinase, putative	0.0	gi|241785982	1012	491	492	100	100	Ixodes scapularis	Serine/threonine-protein kinase SIK3 homolog	1E-108	sp|Q6NSM8|SIK3_DANRE	392	457	1187	47	39	Danio rerio	Pkinase	5E-060	S_TKc	1E-067	S_TKc	1E-065	S_TKc 1e-065| Pkinase 3e-059| PKc 1e-050| STKc_Nek 5e-050| STYKc 6e-044| STKc_AGC 1e-043| PKc_STE 9e-040| STKc_MAST_like 4e-039| STKc_PKA 2e-038| STKc_MAPKKK 3e-037|	100	2	113
gi|241785157	gi|241785157	Ixodes scapularis	Eukaryota; Metazoa; Arthropoda; Chelicerata; Arachnida; Acari; Parasitiformes; Ixodida; Ixodoidea; Ixodidae; Ixodinae; Ixodes.	P	P	564	whirlin, putative	ExpAA=3.59 First60=3.58 PredHel=0 Topology=o	0					BL	42-43	60.364	6.01	55.981	6	VGD_cys disintegrin |	1	whirlin, putative	0.0	gi|241785157	1120	563	564	100	100	Ixodes scapularis	Whirlin	2E-017	sp|Q810W9|WHRN_RAT	90.9	223	920	49	24	Rattus norvegicus	PDZ	4E-014	PDZ	8E-019	PDZ	1E-016	PDZ 1e-016| PDZ_signaling 4e-016| PDZ 2e-013| PDZ 3e-010| PDZ_serine_protease 5e-007| degP_htrA_DO 2e-006| Prc 6e-006| PDZ_metalloprotease 1e-005| TIGR00054 2e-005| PRK10898 1e-004|	101	2	114
gi|241784723	gi|241784723	Ixodes scapularis	Eukaryota; Metazoa; Arthropoda; Chelicerata; Arachnida; Acari; Parasitiformes; Ixodida; Ixodoidea; Ixodidae; Ixodinae; Ixodes.	E	E	302	hypothetical protein IscW_ISCW015131	ExpAA=0.00 First60=0.00 PredHel=0 Topology=o	0					CYT		32.624	4.36			ECD_cys disintegrin |	1	hypothetical protein IscW_ISCW015131	0.0	gi|241784723	649	301	302	100	100	Ixodes scapularis	Protein eyes shut	2E-041	sp|A0A1F4|EYS_DROME	169	1803	2176	48	83	Drosophila melanogaster	Laminin_G_2	2E-004	EGF_CA	7E-007	EGF_CA	2E-005	EGF_CA 2e-005| EGF_CA 8e-005| Laminin_G_2 0.001| LamG 0.004| LamG 0.006| EGF 0.023| EGF 0.040| rmlA | PRK06178 | EGF |	102	2	115
gi|241781194	gi|241781194	Ixodes scapularis	Eukaryota; Metazoa; Arthropoda; Chelicerata; Arachnida; Acari; Parasitiformes; Ixodida; Ixodoidea; Ixodidae; Ixodinae; Ixodes.	R	R	738	amine oxidase, putative	ExpAA=0.15 First60=0.00 PredHel=0 Topology=o	0					CYT		82.911	5.85			KGD_cys disintegrin |	1	amine oxidase, putative	0.0	gi|241781194	1527	737	738	100	100	Ixodes scapularis	Lysine-specific histone demethylase 1B	1E-177	sp|Q8NB78|KDM1B_HUMAN	622	747	822	45	91	Homo sapiens	Amino_oxidase	9E-063	PIG-X	0.12	PLN02529	3E-070	PLN02529 3e-070| PLN02328 4e-070| PLN03000 1e-069| Amino_oxidase 5e-062| PLN02976 9e-062| PLN02268 3e-055| PLN02676 2e-034| COG1231 5e-026| PLN02568 2e-022| COG1233 3e-009|	103	2	116
gi|241757398	gi|241757398	Ixodes scapularis	Eukaryota; Metazoa; Arthropoda; Chelicerata; Arachnida; Acari; Parasitiformes; Ixodida; Ixodoidea; Ixodidae; Ixodinae; Ixodes.	M	M	176	hypothetical protein IscW_ISCW022105	ExpAA=2.25 First60=2.25 PredHel=0 Topology=o	0					SIG	27-28	19.503	7.62	16.447	7.02	RED_cys disintegrin |	1	hypothetical protein IscW_ISCW022105	6E-097	gi|241757398	356	175	176	100	100	Ixodes scapularis	30S ribosomal protein 1, chloroplastic	3.5	sp|P19954|RR30_SPIOL	31.2	50	302	35	17	Spinacia oleracea	Aegerolysin	2.3	NRF	3E-004	NRF	0.034	NRF 0.034| STKc_Sty1_Hog1 0.087| PLDc_N_DEXD_b | PHA02448 | GyrA | oxalate_oxc | parC_Gneg | PRK05560 |	104	2	117
gi|241756729	gi|241756729	Ixodes scapularis	Eukaryota; Metazoa; Arthropoda; Chelicerata; Arachnida; Acari; Parasitiformes; Ixodida; Ixodoidea; Ixodidae; Ixodinae; Ixodes.	M	M	1766	hypothetical protein IscW_ISCW021260	ExpAA=0.11 First60=0.06 PredHel=0 Topology=o	0					BL	17-18	190.625	5.39	189.042	5.43	KGD_cys disintegrin |RTS_cys disintegrin |	2	hypothetical protein IscW_ISCW021260	0.0	gi|241756729	3475	1765	1766	100	100	Ixodes scapularis	Telomere-associated protein RIF1	1E-032	sp|Q6PR54|RIF1_MOUSE	143	2146	2419	25	89	Mus musculus	YL1	0.027	UME	0.11	PHA03307	0.094	PHA03307 0.094| YL1 | valS | PRK07764 | PRK07003 | Vmethyltransf_C | PHA03309 | ligA | PRK05901 | PRK13108 |	105	2	118
gi|241755863	gi|241755863	Ixodes scapularis	Eukaryota; Metazoa; Arthropoda; Chelicerata; Arachnida; Acari; Parasitiformes; Ixodida; Ixodoidea; Ixodidae; Ixodinae; Ixodes.	M	M	659	protein groucho, putative	ExpAA=0.09 First60=0.09 PredHel=0 Topology=o	0					SIG	19-20	71.264	8.55	69.493	8.47	RTS_cys disintegrin |	1	protein groucho, putative	0.0	gi|241755863	1336	658	659	100	100	Ixodes scapularis	Transducin-like enhancer protein 4	0.0	sp|Q04727|TLE4_HUMAN	726	724	773	56	94	Homo sapiens	TLE_N	4E-051	WD40	2E-006	TLE_N	2E-050	TLE_N 2e-050| WD40 7e-028| COG2319 1e-014| PHA03307 2e-004| WD40 3e-004| WD40 3e-004| DUF572 6e-004| TFIIF_alpha 0.003| PHA03325 0.007| DUF566 0.010|	106	2	119
gi|241752757	gi|241752757	Ixodes scapularis	Eukaryota; Metazoa; Arthropoda; Chelicerata; Arachnida; Acari; Parasitiformes; Ixodida; Ixodoidea; Ixodidae; Ixodinae; Ixodes.	V	V	974	rolling pebbles, putative	ExpAA=0.06 First60=0.02 PredHel=0 Topology=o	0					CYT		106.455	6.9			RED_cys disintegrin |	1	rolling pebbles, putative	0.0	gi|241752757	1954	973	974	100	100	Ixodes scapularis	Protein TANC2	0.0	sp|Q9HCD6|TANC2_HUMAN	852	1013	1990	45	51	Homo sapiens	Ank_2	3E-020	ANK	3E-004	ANK	3E-025	ANK 3e-025| Ank_2 2e-019| PHA03100 2e-019| Arp 1e-015| PHA02875 6e-015| PHA02874 9e-015| PLN03192 5e-014| PHA02876 3e-013| PHA03095 8e-012| PHA02878 2e-010|	107	2	120
gi|241752169	gi|241752169	Ixodes scapularis	Eukaryota; Metazoa; Arthropoda; Chelicerata; Arachnida; Acari; Parasitiformes; Ixodida; Ixodoidea; Ixodidae; Ixodinae; Ixodes.	P	P	102	hypothetical protein IscW_ISCW013364	ExpAA=0.00 First60=0.00 PredHel=0 Topology=o	0					CYT		11.091	9.18			KTS_cys disintegrin |	1	hypothetical protein IscW_ISCW013364	2E-059	gi|241752169	231	101	102	100	100	Ixodes scapularis	Nucleic-acid-binding protein from transposon X-element	3E-004	sp|Q9NBX5|GAGXE_DROME	43.9	89	501	28	18	Drosophila melanogaster	Ebola_NP	1.4	HDc	0.14	g_glut_trans	0.38	g_glut_trans | Ggt | PHA03301 | AIR1 | treA | PRK14286 | SIR2-fam | PTZ00368 |	108	2	121
gi|241748782	gi|241748782	Ixodes scapularis	Eukaryota; Metazoa; Arthropoda; Chelicerata; Arachnida; Acari; Parasitiformes; Ixodida; Ixodoidea; Ixodidae; Ixodinae; Ixodes.	L	L	227	Canopy3, putative	ExpAA=18.78 First60=18.78 PredHel=1 Topology=i12-31o	1	8.4	86.3	5.3		SIG	30-31	25.457	6.04	22.146	5.41	KGD_cys disintegrin |	1	Canopy3, putative	1E-127	gi|241748782	459	226	227	100	100	Ixodes scapularis	Protein canopy 4	9E-047	sp|Q2L6K8|CNPY4_DANRE	186	164	217	52	76	Danio rerio	DUF3456	1E-039	MYSc	0.29	DUF3456	5E-039	DUF3456 5e-039| Lipase_2 | PRK10535 | oorA | PRK14477 | alaS | LysA | PHA02728 | PHA02666 | ECM1 |	109	2	122
gi|241747890	gi|241747890	Ixodes scapularis	Eukaryota; Metazoa; Arthropoda; Chelicerata; Arachnida; Acari; Parasitiformes; Ixodida; Ixodoidea; Ixodidae; Ixodinae; Ixodes.	E	E	1003	Exportin-6, putative	ExpAA=0.06 First60=0.00 PredHel=0 Topology=o	0					CYT		112.795	5.96			RGD_cys disintegrin |	1	Exportin-6, putative	0.0	gi|241747890	1987	1002	1003	100	100	Ixodes scapularis	Exportin-6	0.0	sp|Q924Z6|XPO6_MOUSE	872	943	1125	48	84	Mus musculus	Xpo1	3E-016	UME	0.42	Xpo1	2E-015	Xpo1 2e-015| CRM1 7e-013| PLN02362 | PRK05632 | PKc_MAPKK_Byr1_like | thiC | Prominin | PHA03233 | GlnE | KAP95 |	110	2	123
gi|241747887	gi|241747887	Ixodes scapularis	Eukaryota; Metazoa; Arthropoda; Chelicerata; Arachnida; Acari; Parasitiformes; Ixodida; Ixodoidea; Ixodidae; Ixodinae; Ixodes.	W	W	704	DNA polymerase theta, putative	ExpAA=0.14 First60=0.00 PredHel=0 Topology=o	0					CYT		76.494	8.15			KTS_cys disintegrin |	1	DNA polymerase theta, putative	0.0	gi|241747887	1409	703	704	100	100	Ixodes scapularis	DNA polymerase theta	1E-155	sp|O75417|DPOLQ_HUMAN	550	750	2590	43	29	Homo sapiens	DEAD	3E-017	DEXDc	6E-019	PRK02362	2E-074	PRK02362 2e-074| COG1204 4e-074| PRK00254 2e-058| PRK01172 1e-048| COG4581 1e-034| COG1202 2e-032| Lhr 9e-021| DEXDc 8e-017| DEAD 2e-016| COG1205 2e-015|	111	2	124
gi|241747026	gi|241747026	Ixodes scapularis	Eukaryota; Metazoa; Arthropoda; Chelicerata; Arachnida; Acari; Parasitiformes; Ixodida; Ixodoidea; Ixodidae; Ixodinae; Ixodes.	T	T	142	neprilysin, putative	ExpAA=0.00 First60=0.00 PredHel=0 Topology=o	0					CYT		15.93	8.68			RED_cys disintegrin |	1	neprilysin, putative	1E-077	gi|241747026	292	141	142	100	100	Ixodes scapularis	Putative zinc metalloproteinase T16A9.4	2E-014	sp|Q22523|YCYL_CAEEL	77.8	129	769	36	17	Caenorhabditis elegans	Peptidase_M13	4E-015	A4_EXTRA	0.27	M13	7E-024	M13 7e-024| Peptidase_M13 2e-014| PepO 9e-005| Orbi_NS3 | PRK05742 | PRK00724 | PRP8 | PRK09449 | PTZ00108 | Ubi-OHases |	112	2	125
gi|241743886	gi|241743886	Ixodes scapularis	Eukaryota; Metazoa; Arthropoda; Chelicerata; Arachnida; Acari; Parasitiformes; Ixodida; Ixodoidea; Ixodidae; Ixodinae; Ixodes.	M	M	100	secreted salivary gland peptide, putative	ExpAA=2.36 First60=2.36 PredHel=0 Topology=o	0					SIG	18-19	10.357	8.77	8.654	8.76	RGD_cys disintegrin |	1	secreted salivary gland peptide, putative	3E-054	gi|241743886	214	99	100	100	100	Ixodes scapularis	Glutamyl-tRNA synthetase	0.51	sp|Q3SI46|SYE_THIDA	33.1	45	472	38	10	Thiobacillus denitrificans (strain ATCC 25259)	Glyco_transf_52	0.74	WNT1	0.39	COG5373	7.5	COG5373 | mena_SCO4550 |	1	142	126
gi|241742595	gi|241742595	Ixodes scapularis	Eukaryota; Metazoa; Arthropoda; Chelicerata; Arachnida; Acari; Parasitiformes; Ixodida; Ixodoidea; Ixodidae; Ixodinae; Ixodes.	E	E	892	integrator complex subunit, putative	ExpAA=9.58 First60=0.12 PredHel=0 Topology=o	0					CYT		101.394	5.59			RED_cys disintegrin |	1	integrator complex subunit, putative	0.0	gi|241742595	1791	891	892	100	100	Ixodes scapularis	Integrator complex subunit 3	0.0	sp|Q7TPD0|INT3_MOUSE	961	875	1041	52	84	Mus musculus	DUF2356	1E-107	PKS_ER	1.1	DUF2356	1E-106	DUF2356 e-106| YciF | DUF892 | TIGR00296 | PLN02403 | PRK00068 | Ebola_NP | PTZ00326 |	113	2	127
gi|241738740	gi|241738740	Ixodes scapularis	Eukaryota; Metazoa; Arthropoda; Chelicerata; Arachnida; Acari; Parasitiformes; Ixodida; Ixodoidea; Ixodidae; Ixodinae; Ixodes.	I	I	1934	fibrillin-1, putative	ExpAA=0.00 First60=0.00 PredHel=0 Topology=o	0					CYT		209.522	4.56			RGD_cys disintegrin |ECD_cys disintegrin |	2	fibrillin-1, putative	0.0	gi|241738740	4337	1933	1934	100	100	Ixodes scapularis	Fibrillin-2	0.0	sp|Q61555|FBN2_MOUSE	1807	2804	2907	40	96	Mus musculus	EGF_3	1E-006	EGF_CA	6E-006	vWA_Matrilin	3E-006	vWA_Matrilin 3e-006| EGF_3 7e-006| EGF_CA 9e-004| cEGF 0.001| TB 0.003| EGF_CA 0.003| Plasmod_Pvs28 0.013| EGF_CA 0.060| EGF 0.084|	30	3	32
gi|241738388	gi|241738388	Ixodes scapularis	Eukaryota; Metazoa; Arthropoda; Chelicerata; Arachnida; Acari; Parasitiformes; Ixodida; Ixodoidea; Ixodidae; Ixodinae; Ixodes.	M	M	87	colostrum trypsin inhibitor, putative	ExpAA=16.20 First60=16.20 PredHel=1 Topology=o10-27i	1	19.5	11.5	69		BL	23-24	10.022	9.26	7.428	9.19	VGD_cys disintegrin |	1	colostrum trypsin inhibitor, putative	1E-045	gi|241738388	186	86	87	100	100	Ixodes scapularis	Trophoblast Kunitz domain protein 1	5E-012	sp|Q29428|TKDP1_SHEEP	69.7	95	265	35	36	Ovis aries	Kunitz_BPTI	2E-010	KU	9E-012	Kunitz_BPTI	8E-010	Kunitz_BPTI 8e-010| KU 1e-009| KU 6e-009| bcsA | CTP_transf_1 | PRK13657 | PRK03893 |	1	142	5
gi|241735164	gi|241735164	Ixodes scapularis	Eukaryota; Metazoa; Arthropoda; Chelicerata; Arachnida; Acari; Parasitiformes; Ixodida; Ixodoidea; Ixodidae; Ixodinae; Ixodes.	N	N	612	phosphoglucomutase/phosphomannomutase, putative	ExpAA=3.25 First60=0.03 PredHel=0 Topology=o	0					CYT		68.564	6.75			RTS_cys disintegrin |	1	phosphoglucomutase/phosphomannomutase, putative	0.0	gi|241735164	1251	611	612	100	100	Ixodes scapularis	Phosphoglucomutase-2	1E-157	sp|Q5RFI8|PGM2_PONAB	555	595	612	49	97	Pongo abelii	PGM_PMM_I	3E-037	Adenylsucc_synt	0.30	PTZ00150	1E-170	PTZ00150 e-170| PGM2 8e-075| {ManB} 4e-049| phosphohexomutase 1e-037| PGM_PMM_I 2e-036| PGM_like2 3e-026| PMM_PGM 2e-012| PGM_like1 3e-012| Arch_GlmM 2e-011| PGM_PMM_III 6e-011|	114	2	128
gi|241726578	gi|241726578	Ixodes scapularis	Eukaryota; Metazoa; Arthropoda; Chelicerata; Arachnida; Acari; Parasitiformes; Ixodida; Ixodoidea; Ixodidae; Ixodinae; Ixodes.	R	R	667	lysosomal alpha-glucosidase, putative	ExpAA=0.16 First60=0.00 PredHel=0 Topology=o	0					CYT		76.374	7.39			MLD_cys disintegrin |	1	lysosomal alpha-glucosidase, putative	0.0	gi|241726578	1395	666	667	100	100	Ixodes scapularis	Lysosomal alpha-glucosidase	1E-141	sp|P10253|LYAG_HUMAN	503	641	952	41	67	Homo sapiens	Glyco_hydro_31	1E-107	PD	9E-006	GH31_MGAM_SI_GA	1E-123	GH31_MGAM_SI_GAA e-123| Glyco_hydro_31 e-106| GH31_glucosidase_II_MalA 4e-076| GH31_MGAM-like 2e-072| COG1501 5e-072| GH31_GANC_GANAB_alpha 5e-059| PLN02763 5e-058| GH31 2e-037| GH31_transferase_CtsZ 1e-025| GH31_xylosidase_YicI 3e-024|	115	2	129
gi|241725792	gi|241725792	Ixodes scapularis	Eukaryota; Metazoa; Arthropoda; Chelicerata; Arachnida; Acari; Parasitiformes; Ixodida; Ixodoidea; Ixodidae; Ixodinae; Ixodes.	M	M	122	secreted salivary gland peptide, putative	ExpAA=15.46 First60=15.46 PredHel=1 Topology=o4-21i	1	13.9	3.3	82.8		SIG	23-24	12.829	8.63	10.297	8.51	VGD_cys disintegrin |	1	secreted salivary gland peptide, putative	3E-072	gi|241725792	274	121	122	100	100	Ixodes scapularis	Keratin-associated protein 5-4	3E-004	sp|Q6L8H1|KRA54_HUMAN	43.9	246	288	27	86	Homo sapiens	ResB	2.3	WAP	0.28	HAD-SF-IE	0.51	HAD-SF-IE | Gallate_Doxase_N | PRK15432 | PRK03467 | PRK14989 |	1	142	22
gi|241720478	gi|241720478	Ixodes scapularis	Eukaryota; Metazoa; Arthropoda; Chelicerata; Arachnida; Acari; Parasitiformes; Ixodida; Ixodoidea; Ixodidae; Ixodinae; Ixodes.	K	K	166	ubiquitin conjugating enzyme interacting protein, putative	ExpAA=0.00 First60=0.00 PredHel=0 Topology=i	0					CYT		18.596	5.85			RTS_cys disintegrin |	1	ubiquitin conjugating enzyme interacting protein, putative	1E-096	gi|241720478	355	165	166	100	100	Ixodes scapularis	RanBP-type and C3HC4-type zinc finger-containing protein 1	3E-031	sp|Q62921|HOIL1_RAT	134	151	508	40	30	Rattus norvegicus	IBR	0.017	IBR	0.004	IBR	0.082	IBR 0.082| IBR | RhoGAP_fRGD1 | COG4116 | cPLA2_like | PRK05222 | PRK00770 | Poxvirus_B22R | COG4068 | Maf1 |	116	2	130
gi|241720441	gi|241720441	Ixodes scapularis	Eukaryota; Metazoa; Arthropoda; Chelicerata; Arachnida; Acari; Parasitiformes; Ixodida; Ixodoidea; Ixodidae; Ixodinae; Ixodes.	L	L	385	fucosyltransferase, putative	ExpAA=0.77 First60=0.00 PredHel=0 Topology=o	0					CYT		45.526	7.93			RED_cys disintegrin |	1	fucosyltransferase, putative	0.0	gi|241720441	830	384	385	100	100	Ixodes scapularis	Alpha-(1,3)-fucosyltransferase C	3E-048	sp|P83088|FUCTC_DROME	192	334	424	36	79	Drosophila melanogaster	Glyco_transf_10	1E-069	ZnF_NFX	1.1	Glyco_transf_10	6E-069	Glyco_transf_10 6e-069| ugpQ | Fes1 | NF-X1-zinc-finger | hisH |	117	2	131
gi|241720419	gi|241720419	Ixodes scapularis	Eukaryota; Metazoa; Arthropoda; Chelicerata; Arachnida; Acari; Parasitiformes; Ixodida; Ixodoidea; Ixodidae; Ixodinae; Ixodes.	T	T	2377	E1A-binding protein p400, putative	ExpAA=1.03 First60=0.00 PredHel=0 Topology=o	0					CYT		261.49	8.76			RTS_cys disintegrin |	1	E1A-binding protein p400, putative	0.0	gi|241720419	4713	2376	2377	100	100	Ixodes scapularis	Helicase domino	0.0	sp|Q9NDJ2|DOM_DROME	1447	3140	3198	39	98	Drosophila melanogaster	SNF2_N	3E-094	DEXDc	5E-026	SNF2_N	2E-093	SNF2_N 2e-093| PLN03142 1e-083| HepA 2e-061| DEXDc 7e-024| HELICc 6e-022| HELICc 4e-019| Helicase_C 2e-018| DEXDc 9e-016| PRK07764 2e-010| Med15 2e-009|	118	2	132
gi|241719667	gi|241719667	Ixodes scapularis	Eukaryota; Metazoa; Arthropoda; Chelicerata; Arachnida; Acari; Parasitiformes; Ixodida; Ixodoidea; Ixodidae; Ixodinae; Ixodes.	M	M	241	proclotting enzyme precursor, putative	ExpAA=0.00 First60=0.00 PredHel=0 Topology=o	0					SIG	16-17	26.598	6.29	24.711	6.57	KGD_cys disintegrin |RTS_cys disintegrin |	2	proclotting enzyme precursor, putative	1E-140	gi|241719667	503	240	241	100	100	Ixodes scapularis	Proclotting enzyme	1E-055	sp|P21902|PCE_TACTR	216	223	375	45	60	Tachypleus tridentatus	Trypsin	9E-047	Tryp_SPc	3E-065	Tryp_SPc	3E-063	Tryp_SPc 3e-063| Tryp_SPc 1e-060| Trypsin 5e-046| COG5640 2e-021| COG3591 | DUF3142 | PRK08393 | Peptidase_S6 |	7	14	10
gi|241718557	gi|241718557	Ixodes scapularis	Eukaryota; Metazoa; Arthropoda; Chelicerata; Arachnida; Acari; Parasitiformes; Ixodida; Ixodoidea; Ixodidae; Ixodinae; Ixodes.	S	S	691	cysteine-rich protein 2-binding protein, putative	ExpAA=0.10 First60=0.06 PredHel=0 Topology=o	0					CYT		78.528	8.3			MLD_cys disintegrin |	1	cysteine-rich protein 2-binding protein, putative	0.0	gi|241718557	1417	690	691	100	100	Ixodes scapularis	Cysteine-rich protein 2-binding protein	1E-137	sp|Q9H8E8|CSR2B_HUMAN	488	688	782	42	88	Homo sapiens	Acetyltransf_1	2E-009	CM_2	0.11	RimI	1E-009	RimI 1e-009| Acetyltransf_1 1e-008| rimI 9e-008| NAT_SF 4e-004| rimI 0.001| PRK11907 0.001| COG3393 0.003| Eis 0.024| ArgA 0.031| DUF1510 0.036|	119	2	133
gi|241717498	gi|241717498	Ixodes scapularis	Eukaryota; Metazoa; Arthropoda; Chelicerata; Arachnida; Acari; Parasitiformes; Ixodida; Ixodoidea; Ixodidae; Ixodinae; Ixodes.	M	M	445	conserved hypothetical protein	ExpAA=0.01 First60=0.00 PredHel=0 Topology=o	0					BL	20-21	48.872	8.58	46.748	8.62	RTS_cys disintegrin |	1	conserved hypothetical protein	0.0	gi|241717498	914	444	445	100	100	Ixodes scapularis	Cirhin	5E-051	sp|Q969X6|CIR1A_HUMAN	202	366	686	33	53	Homo sapiens	WD40	6E-004	WD40	2E-005	WD40	5E-011	WD40 5e-011| COG2319 1e-008| WD40 0.003| WD40 0.003| fadA | SCP2 | DUF3312 | PTZ00220 | PRK13299 | ABC_membrane_2 |	120	2	134
gi|241714213	gi|241714213	Ixodes scapularis	Eukaryota; Metazoa; Arthropoda; Chelicerata; Arachnida; Acari; Parasitiformes; Ixodida; Ixodoidea; Ixodidae; Ixodinae; Ixodes.	V	V	629	transcriptional repressor CTCF, putative	ExpAA=0.00 First60=0.00 PredHel=0 Topology=o	0					CYT		71.128	5.92			ECD_cys disintegrin |	1	transcriptional repressor CTCF, putative	0.0	gi|241714213	1310	628	629	100	100	Ixodes scapularis	Transcriptional repressor CTCF	1E-108	sp|Q08705|CTCF_CHICK	393	404	728	48	56	Gallus gallus	TFIIA	0.11	ZnF_C2H2	0.007	COG5048	1E-005	COG5048 1e-005| SFP1 | PRK05580 | SSL1 | TFIIA | MDN1 | zf-C2H2 | ZnF_C2H2 | BUD22 | PHA00733 |	121	2	135
gi|241713068	gi|241713068	Ixodes scapularis	Eukaryota; Metazoa; Arthropoda; Chelicerata; Arachnida; Acari; Parasitiformes; Ixodida; Ixodoidea; Ixodidae; Ixodinae; Ixodes.	V	V	234	ca(2+)/calmodulin-dependent protein kinase phosphatase, putative	ExpAA=0.04 First60=0.00 PredHel=0 Topology=o	0					CYT		25.691	5.23			RED_cys disintegrin |	1	ca(2+)/calmodulin-dependent protein kinase phosphatase, putative	1E-136	gi|241713068	487	233	234	100	100	Ixodes scapularis	Protein phosphatase 1E	8E-046	sp|Q80Z30|PPM1E_RAT	183	207	750	45	28	Rattus norvegicus	PP2C	3E-040	PP2Cc	1E-043	PP2Cc	1E-041	PP2Cc 1e-041| PP2Cc 4e-041| PP2C 1e-039| PTZ00224 4e-025| PLN03145 1e-020| PTC1 2e-019| DUF3482 | ATPsyn_F1gamma | PA_EDEM3_like | PRK13616 |	122	2	136
gi|241709425	gi|241709425	Ixodes scapularis	Eukaryota; Metazoa; Arthropoda; Chelicerata; Arachnida; Acari; Parasitiformes; Ixodida; Ixodoidea; Ixodidae; Ixodinae; Ixodes.	L	L	567	peroxinectin, putative	ExpAA=0.04 First60=0.00 PredHel=0 Topology=o	0					CYT		63.775	5.63			RTS_cys disintegrin |	1	peroxinectin, putative	0.0	gi|241709425	1171	566	567	100	100	Ixodes scapularis	Chorion peroxidase	2E-082	sp|Q9VEG6|PERC_DROME	306	552	809	34	68	Drosophila melanogaster	An_peroxidase	1E-137	GGDEF	1.8	peroxinectin_li	1E-146	peroxinectin_like e-146| An_peroxidase e-136| peroxidasin_like 5e-079| peroxinectin_like_bacterial 1e-070| thyroid_peroxidase 2e-066| An_peroxidase_like 1e-064| myeloperoxidase_like 4e-061| dual_peroxidase_like 1e-052| An_peroxidase_bacterial_2 3e-022| prostaglandin_endoperoxide_synthase 2e-019|	21	4	23
gi|241709231	gi|241709231	Ixodes scapularis	Eukaryota; Metazoa; Arthropoda; Chelicerata; Arachnida; Acari; Parasitiformes; Ixodida; Ixodoidea; Ixodidae; Ixodinae; Ixodes.	M	M	92	hypothetical protein IscW_ISCW011410	ExpAA=3.74 First60=3.74 PredHel=0 Topology=o	0					SIG	26-27	10.688	9.5	7.686	8.76	MLD_cys disintegrin |	1	hypothetical protein IscW_ISCW011410	3E-047	gi|241709231	191	91	92	100	100	Ixodes scapularis	FAD-dependent oxidoreductase domain-containing protein 2	2E-007	sp|Q8IWF2|FXRD2_HUMAN	54.3	40	684	56	6	Homo sapiens	Thi4	0.004	PLAc	0.69	TrkA	7E-005	TrkA 7e-005| FixC 1e-004| HemY 1e-004| Bthiol_YpdA 2e-004| PRK09853 5e-004| PRK04176 0.001| Se_ygfK 0.001| MSMEG_0569_nitr 0.002| PRK11883 0.002| THI4 0.003|	123	2	137
gi|241708328	gi|241708328	Ixodes scapularis	Eukaryota; Metazoa; Arthropoda; Chelicerata; Arachnida; Acari; Parasitiformes; Ixodida; Ixodoidea; Ixodidae; Ixodinae; Ixodes.	V	V	1617	transcription initiation factor tfii-D, putative	ExpAA=0.89 First60=0.00 PredHel=0 Topology=o	0					CYT		182.976	6.1			KGD_cys disintegrin |	1	transcription initiation factor tfii-D, putative	0.0	gi|241708328	3288	1616	1617	100	100	Ixodes scapularis	Transcription initiation factor TFIID subunit 1	0.0	sp|Q60544|TAF1_MESAU	1536	1610	1865	51	86	Mesocricetus auratus	DUF3591	1E-149	BROMO	3E-024	DUF3591	1E-148	DUF3591 e-148| TAF1 7e-076| Bromo_TFIID 6e-040| BROMO 5e-022| Bromodomain 9e-021| Bromo_gcn5_like 2e-020| COG5076 5e-018| Bromodomain 3e-017| Bromo_BAZ2A_B_like 2e-015| Bromo_RACK7 2e-014|	124	2	138
gi|241708208	gi|241708208	Ixodes scapularis	Eukaryota; Metazoa; Arthropoda; Chelicerata; Arachnida; Acari; Parasitiformes; Ixodida; Ixodoidea; Ixodidae; Ixodinae; Ixodes.	V	V	570	LIM domain-binding protein, putative	ExpAA=0.00 First60=0.00 PredHel=0 Topology=o	0					CYT		59.61	9.3			KGD_cys disintegrin |	1	LIM domain-binding protein, putative	0.0	gi|241708208	1198	569	570	100	100	Ixodes scapularis	PDZ and LIM domain protein Zasp	7E-092	sp|A1ZA47|ZASP_DROME	338	2156	2194	41	98	Drosophila melanogaster	LIM	5E-012	PDZ	5E-011	LIM3_Enigma_lik	3E-027	LIM3_Enigma_like_1 3e-027| LIM1_Enigma_like_1 2e-026| LIM3_Enigma_like 4e-023| LIM1_Enigma_like 2e-018| LIM2_Enigma_like 1e-017| LIM3_ENH 6e-016| LIM 1e-014| LIM3_Enigma 2e-014| LIM3_ZASP_Cypher 3e-014| LIM1_Paxillin_like 7e-014|	125	2	139
gi|241702184	gi|241702184	Ixodes scapularis	Eukaryota; Metazoa; Arthropoda; Chelicerata; Arachnida; Acari; Parasitiformes; Ixodida; Ixodoidea; Ixodidae; Ixodinae; Ixodes.	A	A	530	conserved hypothetical protein	ExpAA=9.57 First60=1.96 PredHel=0 Topology=o	0					CYT		61.069	7.04			RGD_cys disintegrin |	1	conserved hypothetical protein	0.0	gi|241702184	1080	529	530	100	100	Ixodes scapularis	Tetratricopeptide repeat protein 39B	1E-128	sp|Q5XHH9|TT39B_XENLA	459	526	586	45	90	Xenopus laevis	DUF3808	1E-107	H4	0.21	DUF3808	1E-107	DUF3808 e-107| PEP_TPR_lipo 0.085| ALDH_F1-2_Ald2-like | PLN02249 | DAP-DH | COG4682 | PRK13656 | POLBc_alpha | StaR_like | hybrid_clust |	126	2	140
gi|241701832	gi|241701832	Ixodes scapularis	Eukaryota; Metazoa; Arthropoda; Chelicerata; Arachnida; Acari; Parasitiformes; Ixodida; Ixodoidea; Ixodidae; Ixodinae; Ixodes.	M	M	106	hypothetical protein IscW_ISCW013379	ExpAA=35.85 First60=19.67 PredHel=0 Topology=o	0					BL	-1	11.952	8.92			VGD_cys disintegrin |	1	hypothetical protein IscW_ISCW013379	8E-059	gi|241701832	229	105	106	100	100	Ixodes scapularis	NAD(P)H-quinone oxidoreductase subunit 2, chloroplastic	1.4	sp|Q32RP6|NU2C_ZYGCR	31.6	64	497	28	13	Zygnema circumcarinatum	Noggin	0.50	FGF	1.1	Noggin	2.3	Noggin | PRK10854 |	127	2	141
gi|241700757	gi|241700757	Ixodes scapularis	Eukaryota; Metazoa; Arthropoda; Chelicerata; Arachnida; Acari; Parasitiformes; Ixodida; Ixodoidea; Ixodidae; Ixodinae; Ixodes.	C	C	853	RNA-binding translational regulator IRP, putative	ExpAA=0.03 First60=0.00 PredHel=0 Topology=o	0					CYT		94.199	6.36			RTS_cys disintegrin |	1	RNA-binding translational regulator IRP, putative	0.0	gi|241700757	1733	852	853	100	100	Ixodes scapularis	Aconitate hydratase, cytoplasmic	0.0	sp|P49608|ACOC_CUCMA	945	891	898	54	99	Cucurbita maxima	Aconitase	1E-067	TR_THY	0.88	acnA	0.0	acnA | AcnA | PRK09277 | PTZ00092 | aconitase_1 | PLN00070 | 2met_isocit_dHY e-179| AcnA_IRP e-125| AcnA_IRP_Swivel 7e-083| Aconitase 4e-069|	128	2	142
gi|241699686	gi|241699686	Ixodes scapularis	Eukaryota; Metazoa; Arthropoda; Chelicerata; Arachnida; Acari; Parasitiformes; Ixodida; Ixodoidea; Ixodidae; Ixodinae; Ixodes.	V	V	453	copine, putative	ExpAA=0.90 First60=0.00 PredHel=0 Topology=o	0					CYT		51.574	5.26			ECD_cys disintegrin |	1	copine, putative	0.0	gi|241699686	931	452	453	100	100	Ixodes scapularis	Copine-8	1E-159	sp|Q9DC53|CPNE8_MOUSE	560	446	564	60	79	Mus musculus	Copine	4E-067	C2	1E-012	vWA_copine_like	5E-070	vWA_copine_like 5e-070| Copine 2e-066| C2B_Copine 7e-043| C2A_Copine 2e-042| C2D_Tricalbin-like 4e-011| C2 2e-010| C2 3e-010| VWA 4e-010| C2 2e-009| COG5038 5e-007|	10	6	13
gi|241697063	gi|241697063	Ixodes scapularis	Eukaryota; Metazoa; Arthropoda; Chelicerata; Arachnida; Acari; Parasitiformes; Ixodida; Ixodoidea; Ixodidae; Ixodinae; Ixodes.	E	E	181	KUN-3, putative	ExpAA=1.22 First60=1.22 PredHel=0 Topology=o	0					CYT		20.576	7.6			RGD_cys disintegrin |	1	KUN-3, putative	1E-110	gi|241697063	399	180	181	100	100	Ixodes scapularis	Papilin	3E-006	sp|Q868Z9|PPN_DROME	51.6	764	2898	25	26	Drosophila melanogaster	Kunitz_BPTI	0.17	KU	0.002	KU	0.040	KU 0.040| KU | Kunitz_BPTI | pckA | ascorbate_peroxidase | BIV_Env | DUF3305 | PTKc_Musk |	1	142	11
gi|241695310	gi|241695310	Ixodes scapularis	Eukaryota; Metazoa; Arthropoda; Chelicerata; Arachnida; Acari; Parasitiformes; Ixodida; Ixodoidea; Ixodidae; Ixodinae; Ixodes.	M	M	516	hypothetical protein IscW_ISCW012579	ExpAA=0.42 First60=0.42 PredHel=0 Topology=o	0					BL	19-20	57.57	9.46	55.459	9.4	VGD_cys disintegrin |	1	hypothetical protein IscW_ISCW012579	0.0	gi|241695310	1068	515	516	100	100	Ixodes scapularis	Pre-mRNA-splicing factor CWC22	0.009	sp|Q6C8C5|CWC22_YARLI	42.4	155	954	26	16	Yarrowia lipolytica (strain CLIB 122 / E 150)	DUF3358	0.33	HRDC	1.6	PRK07769	0.39	PRK07769 | DUF3358 | nrdA | PRK12476 | PRK05657 | PRK11907 | Band_7_HflK | PRK14949 | DUF601 | PRK07069 |	129	2	143
gi|241694476	gi|241694476	Ixodes scapularis	Eukaryota; Metazoa; Arthropoda; Chelicerata; Arachnida; Acari; Parasitiformes; Ixodida; Ixodoidea; Ixodidae; Ixodinae; Ixodes.	G	G	380	malonyl CoA-acyl carrier protein transacylase, putative	ExpAA=0.03 First60=0.00 PredHel=0 Topology=o	0					CYT		42.699	8.7			RTS_cys disintegrin |	1	malonyl CoA-acyl carrier protein transacylase, putative	0.0	gi|241694476	771	379	380	100	100	Ixodes scapularis	Probable malonyl-CoA-acyl carrier protein transacylase, mitochondrial	2E-071	sp|Q8T3L6|FABD_DROME	269	321	379	46	85	Drosophila melanogaster	Acyl_transf_1	4E-012	PKS_AT	9E-022	PLN02752	7E-057	PLN02752 7e-057| FabD 1e-043| fabD 3e-042| malonate_mdcH 4e-024| PKS_AT 1e-019| COG3321 4e-015| Acyl_transf_1 2e-011| omega_3_PfaA 4e-010| CBM27 | PRK11630 |	130	2	144
gi|241690880	gi|241690880	Ixodes scapularis	Eukaryota; Metazoa; Arthropoda; Chelicerata; Arachnida; Acari; Parasitiformes; Ixodida; Ixodoidea; Ixodidae; Ixodinae; Ixodes.	M	M	116	secreted salivary gland peptide, putative	ExpAA=19.25 First60=19.25 PredHel=1 Topology=o5-24i	1	16.4	4.3	79.3		SIG	25-26	12.444	4.9	10.009	4.83	KGD_cys disintegrin |	1	secreted salivary gland peptide, putative	6E-064	gi|241690880	246	115	116	100	100	Ixodes scapularis	Colipase	0.002	sp|A9JSD6|COL_XENTR	40.8	52	117	33	45	Xenopus tropicalis	Prokineticin	0.26	COLIPASE	0.017	Prokineticin	1.2	Prokineticin | COLIPASE | PhoX | COLIPASE | AcnX | MopB_PHLH | DUF521 | DMSO_red_II_alp | MF_alpha_N | PBP2_IlvY |	131	2	145
gi|241690488	gi|241690488	Ixodes scapularis	Eukaryota; Metazoa; Arthropoda; Chelicerata; Arachnida; Acari; Parasitiformes; Ixodida; Ixodoidea; Ixodidae; Ixodinae; Ixodes.	M	M	330	serine/threonine protein phosphatase, putative	ExpAA=0.03 First60=0.01 PredHel=0 Topology=o	0					SIG	16-17	36.071	6.31	34.272	5.89	KGD_cys disintegrin |	1	serine/threonine protein phosphatase, putative	0.0	gi|241690488	663	329	330	100	100	Ixodes scapularis	Protein phosphatase PTC7 homolog	2E-089	sp|Q6NVE9|PPTC7_MOUSE	329	305	310	55	99	Mus musculus	SpoIIE	5E-006	PP2Cc	3E-011	PTC1	3E-014	PTC1 3e-014| PP2Cc 2e-010| PP2Cc 4e-009| PP2C_SIG 2e-005| SpoIIE 3e-005| PP2C 0.025| PRK14559 | PRK06156 | ThiS | IKI3 |	132	2	146
gi|241688613	gi|241688613	Ixodes scapularis	Eukaryota; Metazoa; Arthropoda; Chelicerata; Arachnida; Acari; Parasitiformes; Ixodida; Ixodoidea; Ixodidae; Ixodinae; Ixodes.	M	M	781	hypothetical protein IscW_ISCW022090	ExpAA=0.36 First60=0.35 PredHel=0 Topology=o	0					SIG	36-37	87.411	7.75	83.486	7.36	ECD_cys disintegrin |	1	hypothetical protein IscW_ISCW022090	0.0	gi|241688613	1701	780	781	100	100	Ixodes scapularis	Thrombospondin type-1 domain-containing protein 7A	7E-060	sp|Q69ZU6|THS7A_MOUSE	232	1425	1645	25	87	Mus musculus	TSP_1	0.037	TSP1	0.004	TSP_1	0.21	TSP_1 | PRK09379 | TSP1 | ATH1 | DUF969 | PTZ00441 | PRK06083 | PLN03075 |	133	2	147
gi|241688398	gi|241688398	Ixodes scapularis	Eukaryota; Metazoa; Arthropoda; Chelicerata; Arachnida; Acari; Parasitiformes; Ixodida; Ixodoidea; Ixodidae; Ixodinae; Ixodes.	L	L	103	hypothetical protein IscW_ISCW010704	ExpAA=22.60 First60=22.56 PredHel=1 Topology=o20-42i	1	21.4	19.4	59.2		ANC		11.634	10.05			KTS_cys disintegrin |	1	hypothetical protein IscW_ISCW010704	1E-053	gi|241688398	212	102	103	100	100	Ixodes scapularis	MATH and LRR domain-containing protein PFE0570w	3.2	sp|Q8I3Z1|MLRR1_PLAF7	30.4	43	10061	34		Plasmodium falciparum (isolate 3D7)	Aph-1	0.72	PI3Ka	0.48	PLN02517	0.31	PLN02517 | PRK10098 | LysX_arch | C2_PKC_alpha_gamma | ndhI | Aph-1 | BCCT | PRK15406 | PLN00140 | PRK03356 |	134	2	148
gi|241686518	gi|241686518	Ixodes scapularis	Eukaryota; Metazoa; Arthropoda; Chelicerata; Arachnida; Acari; Parasitiformes; Ixodida; Ixodoidea; Ixodidae; Ixodinae; Ixodes.	R	R	236	highwire, putative	ExpAA=0.07 First60=0.00 PredHel=0 Topology=o	0					CYT		25.236	9.1			RGD_cys disintegrin |KTS_cys disintegrin |	2	highwire, putative	1E-130	gi|241686518	469	235	236	100	100	Ixodes scapularis	Probable E3 ubiquitin-protein ligase MYCBP2	9E-047	sp|O75592|MYCB2_HUMAN	186	218	4640	43	5	Homo sapiens	Nucleoporin_N	0.78	HEPN	0.25	TIGR03549	0.59	TIGR03549 | bchH | COG4088 | TypA_BipA | cysS | Nucleoporin_N | TIGR00702 | STKc_SLK | COG4671 | TIGR03843 |	135	2	149
gi|241683348	gi|241683348	Ixodes scapularis	Eukaryota; Metazoa; Arthropoda; Chelicerata; Arachnida; Acari; Parasitiformes; Ixodida; Ixodoidea; Ixodidae; Ixodinae; Ixodes.	M	M	69	secreted protein, putative	ExpAA=11.97 First60=11.97 PredHel=0 Topology=o	0					SIG	22-23	7.638	8.85	5.096	8.88	WGD_cys disintegrin |	1	secreted protein, putative	3E-035	gi|241683348	151	68	69	100	100	Ixodes scapularis	Antimicrobial peptide ISAMP	7E-022	sp|Q8MVA6|ISAMP_IXOSC	102	68	69	68	100	Ixodes scapularis	DUF21	2.1	Cog4	0.42	ROM1	2.2	ROM1 |	1	142	3
gi|241679318	gi|241679318	Ixodes scapularis	Eukaryota; Metazoa; Arthropoda; Chelicerata; Arachnida; Acari; Parasitiformes; Ixodida; Ixodoidea; Ixodidae; Ixodinae; Ixodes.	G	G	169	zinc finger protein, putative	ExpAA=0.00 First60=0.00 PredHel=0 Topology=o	0					CYT		19.656	9.43			ECD_cys disintegrin |	1	zinc finger protein, putative	1E-100	gi|241679318	367	168	169	100	100	Ixodes scapularis	Zinc finger protein 14	5E-017	sp|Q4R4C7|ZNF14_MACFA	87	562	642	32	88	Macaca fascicularis	NPH3	1.6	ZnF_C2H2	0.50	COG1743	0.080	COG1743 0.080| recf | PLN02353 | PhnT2 | NPH3 | PriA |	12	5	14
gi|241674103	gi|241674103	Ixodes scapularis	Eukaryota; Metazoa; Arthropoda; Chelicerata; Arachnida; Acari; Parasitiformes; Ixodida; Ixodoidea; Ixodidae; Ixodinae; Ixodes.	M	M	112	hypothetical protein IscW_ISCW013229	ExpAA=7.74 First60=7.73 PredHel=0 Topology=o	0					SIG	29-30	11.227	4.93	8.046	4.56	VGD_cys disintegrin |KTS_cys disintegrin |	2	hypothetical protein IscW_ISCW013229	4E-060	gi|241674103	234	111	112	100	100	Ixodes scapularis	Connective tissue growth factor	2E-005	sp|P29268|CTGF_MOUSE	47.8	70	348	37	20	Mus musculus	DUF3872	0.80	PKS_KS	0.82	COG3218	0.59	COG3218 | GATase1_1 | PRK04262 | PRK09412 | PTZ00221 | P-ATPase-V | VESA1_N | COG3268 | PRK11479 |	1	142	150
gi|241674051	gi|241674051	Ixodes scapularis	Eukaryota; Metazoa; Arthropoda; Chelicerata; Arachnida; Acari; Parasitiformes; Ixodida; Ixodoidea; Ixodidae; Ixodinae; Ixodes.	K	K	164	zinc finger, C2H2 type, putative	ExpAA=0.00 First60=0.00 PredHel=0 Topology=o	0					CYT		19.476	9.61			RTS_cys disintegrin |	1	zinc finger, C2H2 type, putative	4E-098	gi|241674051	360	163	164	100	100	Ixodes scapularis	Zinc finger protein 28	8E-049	sp|P10078|ZFP28_MOUSE	192	441	825	47	54	Mus musculus	zf-C2H2	0.35	ZnF_C2H2	0.030	SFP1	0.013	SFP1 0.013| COG5048 | PriA | PRK04860 | PTZ00299 | PHA00733 | SSL1 | Nfo | zf-C2H2 | ZnF_C2H2 |	12	5	14
gi|241672104	gi|241672104	Ixodes scapularis	Eukaryota; Metazoa; Arthropoda; Chelicerata; Arachnida; Acari; Parasitiformes; Ixodida; Ixodoidea; Ixodidae; Ixodinae; Ixodes.	M	M	1021	hypothetical protein IscW_ISCW011070	ExpAA=15.89 First60=15.89 PredHel=1 Topology=i7-29o	1	2.2	97.2	0.7		SIG	31-32	111.762	5.62	108.544	5.58	VGD_cys disintegrin |RTS_cys disintegrin |	2	hypothetical protein IscW_ISCW011070	0.0	gi|241672104	2187	1020	1021	100	100	Ixodes scapularis	Sushi, von Willebrand factor type A, EGF and pentraxin domain-containing protein	1E-114	sp|P0C6B8|SVEP1_RAT	413	3464	3564	29	97	Rattus norvegicus	VWA	3E-032	VWA	1E-038	VWA	2E-036	VWA 2e-036| vWFA_subfamily_ECM 3e-035| VWA 2e-031| vWFA 5e-025| vWA_collagen 9e-023| vWA_collagen_alphaI-XII-like 7e-020| vWA_integrins_alpha_subunit 5e-017| vWA_Matrilin 6e-017| vWA_micronemal_protein 2e-016| vWA_collagen_alpha_1-VI-type 2e-016|	136	2	151
gi|241672097	gi|241672097	Ixodes scapularis	Eukaryota; Metazoa; Arthropoda; Chelicerata; Arachnida; Acari; Parasitiformes; Ixodida; Ixodoidea; Ixodidae; Ixodinae; Ixodes.	H	H	464	hypothetical protein IscW_ISCW011067	ExpAA=0.00 First60=0.00 PredHel=0 Topology=o	0					CYT		50.187	5.47			ECD_cys disintegrin |	1	hypothetical protein IscW_ISCW011067	0.0	gi|241672097	1017	463	464	100	100	Ixodes scapularis	Multiple epidermal growth factor-like domains protein 6	1E-041	sp|O88281|MEGF6_RAT	171	1424	1574	31	91	Rattus norvegicus	HYR	2E-007	CCP	9E-006	HYR	1E-006	HYR 1e-006| vWA_Matrilin 1e-004| CCP 2e-004| EGF_CA 5e-004| cEGF 0.001| CCP 0.001| EGF_CA 0.006| Sushi 0.009| EGF_CA | PHA02639 |	137	2	152
gi|241672093	gi|241672093	Ixodes scapularis	Eukaryota; Metazoa; Arthropoda; Chelicerata; Arachnida; Acari; Parasitiformes; Ixodida; Ixodoidea; Ixodidae; Ixodinae; Ixodes.	M	M	1597	neurogenic locus notch, putative	ExpAA=0.75 First60=0.75 PredHel=0 Topology=o	0					SIG	21-22	174.07	5.66	172.096	5.6	KGD_cys disintegrin |	1	neurogenic locus notch, putative	0.0	gi|241672093	3391	1596	1597	100	100	Ixodes scapularis	Sushi, von Willebrand factor type A, EGF and pentraxin domain-containing protein	0.0	sp|P0C6B8|SVEP1_RAT	726	3478	3564	30	98	Rattus norvegicus	VWA	2E-030	VWA	2E-027	VWA	1E-029	VWA 1e-029| vWFA_subfamily_ECM 2e-025| VWA 3e-025| vWA_collagen 2e-020| PTX 4e-018| vWFA 5e-018| vWA_collagen_alphaI-XII-like 1e-016| VWA_integrin_invertebrates 6e-016| vWA_integrins_alpha_subunit 2e-013| vWA_micronemal_protein 1e-012|	138	2	153
gi|241671641	gi|241671641	Ixodes scapularis	Eukaryota; Metazoa; Arthropoda; Chelicerata; Arachnida; Acari; Parasitiformes; Ixodida; Ixodoidea; Ixodidae; Ixodinae; Ixodes.	W	W	490	cytochrome P450, putative	ExpAA=0.15 First60=0.06 PredHel=0 Topology=o	0					SIG	19-20	55.682	6.27	53.333	5.89	KGD_cys disintegrin |	1	cytochrome P450, putative	0.0	gi|241671641	999	489	490	100	100	Ixodes scapularis	Cytochrome P450 1A1	2E-056	sp|Q9YH64|CP1A1_PLAFE	220	458	521	27	88	Platichthys flesus	p450	6E-080	Alpha_TIF	0.48	p450	3E-079	p450 3e-079| PTZ00404 2e-048| PLN02183 1e-041| PLN00110 1e-037| PLN03112 4e-034| PLN02394 1e-032| PLN02687 3e-032| PLN03234 4e-032| PLN02655 4e-030| PLN02966 5e-030|	139	2	154
gi|241652318	gi|241652318	Ixodes scapularis	Eukaryota; Metazoa; Arthropoda; Chelicerata; Arachnida; Acari; Parasitiformes; Ixodida; Ixodoidea; Ixodidae; Ixodinae; Ixodes.	M	M	199	hypothetical protein IscW_ISCW019602	ExpAA=23.00 First60=15.02 PredHel=0 Topology=o	0					SIG	32-33	20.999	6.03	17.638	5.94	RGD_cys disintegrin |	1	hypothetical protein IscW_ISCW019602	1E-117	gi|241652318	423	198	199	100	100	Ixodes scapularis	Perlwapin	0.003	sp|P84811|PWAP_HALLA	42	84	134	29	63	Haliotis laevigata	MSC	1.1	PIPKc	1.1	PRK11413	0.97	PRK11413 | FeS_nifS | PRK07219 | MSC | COG5511 | ilvD | HemE | K_trans | PRK12663 | RbsD_FucU |	140	2	155
gi|241651044	gi|241651044	Ixodes scapularis	Eukaryota; Metazoa; Arthropoda; Chelicerata; Arachnida; Acari; Parasitiformes; Ixodida; Ixodoidea; Ixodidae; Ixodinae; Ixodes.	A	A	533	RCC1 and BTB domain-containing protein, putative	ExpAA=0.04 First60=0.01 PredHel=0 Topology=o	0					CYT		58.006	7.85			RTS_cys disintegrin |	1	RCC1 and BTB domain-containing protein, putative	0.0	gi|241651044	1100	532	533	100	100	Ixodes scapularis	RCC1 and BTB domain-containing protein 1	1E-179	sp|Q8NDN9|RCBT1_HUMAN	627	527	531	57	99	Homo sapiens	BTB	7E-014	BTB	3E-016	ATS1	8E-029	ATS1 8e-029| BTB 4e-014| BTB 4e-013| RCC1 1e-010| PHA03098 0.015| BACK | BACK | HutI | protease_HslV | Alr |	141	2	156
gi|241646755	gi|241646755	Ixodes scapularis	Eukaryota; Metazoa; Arthropoda; Chelicerata; Arachnida; Acari; Parasitiformes; Ixodida; Ixodoidea; Ixodidae; Ixodinae; Ixodes.	V	V	278	copine, putative	ExpAA=0.24 First60=0.24 PredHel=0 Topology=o	0					SIG	17-18	30.921	6.69	29.265	6.75	KTS_cys disintegrin |	1	copine, putative	1E-165	gi|241646755	584	277	278	100	100	Ixodes scapularis	Copine-8	2E-058	sp|Q86YQ8|CPNE8_HUMAN	225	202	564	47	36	Homo sapiens	C2	8E-008	C2	2E-009	C2B_Copine	2E-038	C2B_Copine 2e-038| vWA_copine_like 5e-020| C2A_Copine 1e-007| C2 3e-007| C2 4e-007| C2 5e-006| C2D_Tricalbin-like 9e-006| C2_PKC_alpha_gamma 2e-005| COG5038 1e-004| Copine 0.001|	10	6	13
gi|241646752	gi|241646752	Ixodes scapularis	Eukaryota; Metazoa; Arthropoda; Chelicerata; Arachnida; Acari; Parasitiformes; Ixodida; Ixodoidea; Ixodidae; Ixodinae; Ixodes.	L	L	519	copine, putative	ExpAA=0.12 First60=0.00 PredHel=0 Topology=o	0					CYT		57.946	6.14			KTS_cys disintegrin |	1	copine, putative	0.0	gi|241646752	1054	518	519	100	100	Ixodes scapularis	Copine-8	1E-173	sp|Q86YQ8|CPNE8_HUMAN	607	525	564	57	93	Homo sapiens	Copine	6E-061	C2	8E-014	vWA_copine_like	2E-078	vWA_copine_like 2e-078| Copine 3e-060| C2A_Copine 4e-046| C2B_Copine 9e-044| C2 1e-011| C2 7e-011| C2 8e-011| VWA 2e-010| C2D_Tricalbin-like 2e-008| C2_PKC_alpha_gamma 8e-008|	10	6	13
gi|241645572	gi|241645572	Ixodes scapularis	Eukaryota; Metazoa; Arthropoda; Chelicerata; Arachnida; Acari; Parasitiformes; Ixodida; Ixodoidea; Ixodidae; Ixodinae; Ixodes.	S	S	88	hypothetical protein IscW_ISCW007261	ExpAA=0.00 First60=0.00 PredHel=0 Topology=o	0					CYT		9.126	11.28			RTS_cys disintegrin |	1	hypothetical protein IscW_ISCW007261	1E-041	gi|241645572	172	87	88	100	100	Ixodes scapularis	Protein DSE2	0.23	sp|Q6FT26|DSE2_CANGA	34.3	70	294	32	24	Candida glabrata (strain ATCC 2001 / CBS 138 / JCM 3761 / NBRC 0622 / NRRL Y-65)	PEPCK	2.8	TOP1Bc	1.0	partition_RepA	4.2	partition_RepA | PRK07105 | EscV | PRK04210 |	142	2	157
gi|241643375	gi|241643375	Ixodes scapularis	Eukaryota; Metazoa; Arthropoda; Chelicerata; Arachnida; Acari; Parasitiformes; Ixodida; Ixodoidea; Ixodidae; Ixodinae; Ixodes.	E	E	171	hypothetical protein IscW_ISCW020589	ExpAA=0.00 First60=0.00 PredHel=0 Topology=o	0					CYT		18.496	9.02			RTS_cys disintegrin |	1	hypothetical protein IscW_ISCW020589	2E-092	gi|241643375	341	170	171	100	100	Ixodes scapularis	Neurabin-1	0.046	sp|O35867|NEB1_RAT	37.4	92	1095	31	8	Rattus norvegicus	DUF3503	0.99	MAM	2.5	PLN02652	0.042	PLN02652 0.042| DUF3503 | PRK13533 | asd_EA | Myosin_tail_1 | PLN02243 | PLN02981 | START_STARD12-like |	143	2	158
gi|241642113	gi|241642113	Ixodes scapularis	Eukaryota; Metazoa; Arthropoda; Chelicerata; Arachnida; Acari; Parasitiformes; Ixodida; Ixodoidea; Ixodidae; Ixodinae; Ixodes.	M	M	174	jag2 protein, putative	ExpAA=2.23 First60=2.22 PredHel=0 Topology=o	0					SIG	19-20	18.595	9.62	16.563	9.39	RTS_cys disintegrin |	1	jag2 protein, putative	2E-098	gi|241642113	361	173	174	100	100	Ixodes scapularis	Protein jagged-1a	5E-018	sp|Q90Y57|JAG1A_DANRE	90.5	148	1242	36	12	Danio rerio	MNNL	4E-020	AIP3	1.2	MNNL	2E-019	MNNL 2e-019| DUF2561 | PHA03215 | PRKCSH-like | FAP | M14_CPA_CPB_like | PLN02750 | gltS | PHA03321 | Adeno_terminal |	144	2	159
gi|241640410	gi|241640410	Ixodes scapularis	Eukaryota; Metazoa; Arthropoda; Chelicerata; Arachnida; Acari; Parasitiformes; Ixodida; Ixodoidea; Ixodidae; Ixodinae; Ixodes.	A	A	492	zinc finger protein, putative	ExpAA=0.00 First60=0.00 PredHel=0 Topology=o	0					CYT		57.698	9.43			KGD_cys disintegrin |	1	zinc finger protein, putative	0.0	gi|241640410	1078	491	492	100	100	Ixodes scapularis	Zinc finger protein 624	6E-072	sp|Q9P2J8|ZN624_HUMAN	271	637	865	32	74	Homo sapiens	RdRP_4	0.51	SprT	0.18	SFP1	0.002	SFP1 0.002| PHA00733 0.024| PRK05580 | SSL1 | COG3677 |	145	2	160
gi|241635181	gi|241635181	Ixodes scapularis	Eukaryota; Metazoa; Arthropoda; Chelicerata; Arachnida; Acari; Parasitiformes; Ixodida; Ixodoidea; Ixodidae; Ixodinae; Ixodes.	M	M	369	conserved hypothetical protein	ExpAA=22.92 First60=22.44 PredHel=1 Topology=i12-34o	1	6	90.8	3.3		BL	40-41	40.01	5.8	35.709	5.85	VGD_cys disintegrin |	1	conserved hypothetical protein	0.0	gi|241635181	745	368	369	100	100	Ixodes scapularis	Abhydrolase domain-containing protein 15	5E-036	sp|Q5F2F2|ABH15_MOUSE	152	315	459	33	69	Mus musculus	Abhydrolase_6	0.002	PKS_TE	1.2	PLN02511	7E-021	PLN02511 7e-021| COG0429 1e-018| PldB 3e-005| PRK10985 8e-005| Abhydrolase_6 0.010| VirJ | PRK08186 | VirJ | PRK12316 | Pchlide_reductase_N |	20	4	21
gi|241634905	gi|241634905	Ixodes scapularis	Eukaryota; Metazoa; Arthropoda; Chelicerata; Arachnida; Acari; Parasitiformes; Ixodida; Ixodoidea; Ixodidae; Ixodinae; Ixodes.	H	H	430	prohormone convertase, putative	ExpAA=0.42 First60=0.00 PredHel=0 Topology=o	0					CYT		46.963	6.62			KTS_cys disintegrin |	1	prohormone convertase, putative	0.0	gi|241634905	899	429	430	100	100	Ixodes scapularis	Neuroendocrine convertase 2	1E-165	sp|Q5REC2|NEC2_PONAB	583	408	638	68	64	Pongo abelii	Peptidase_S8	5E-049	SEC14	2.1	Peptidases_S8_	8E-095	Peptidases_S8_Protein_convertases_Kexins... 343 8e-095 8e-095| Peptidase_S8 3e-048| P_proprotein 2e-028| Peptidases_S8_S53 6e-016| Peptidases_S8_15 1e-015| Peptidases_S8_Subtilisin_like 1e-014| Peptidases_S8_Autotransporter_serine_pro... 59 3e-009 3e-009| AprE 2e-008| COG4935 2e-008| T7SS_mycosin 2e-007|	32	3	36
gi|241632447	gi|241632447	Ixodes scapularis	Eukaryota; Metazoa; Arthropoda; Chelicerata; Arachnida; Acari; Parasitiformes; Ixodida; Ixodoidea; Ixodidae; Ixodinae; Ixodes.	I	I	124	cytochrome C oxidase polypeptide Vb	ExpAA=0.00 First60=0.00 PredHel=0 Topology=o	0					CYT		14.158	9.16			RGD_cys disintegrin |	1	cytochrome C oxidase polypeptide Vb	1E-068	gi|241632447	262	123	124	100	100	Ixodes scapularis	Cytochrome c oxidase subunit 5B, mitochondrial	4E-018	sp|P19536|COX5B_MOUSE	89.7	121	128	41	95	Mus musculus	COX5B	1E-014	AgrB	0.93	Cyt_c_Oxidase_V	2E-034	Cyt_c_Oxidase_Vb 2e-034| COX5B 5e-014| PLN02294 2e-011| CdsA | PRK15483 | PTZ00043 | cdsA | PRK06188 | PRK06210 | PLN02807 |	15	4	17
gi|241631810	gi|241631810	Ixodes scapularis	Eukaryota; Metazoa; Arthropoda; Chelicerata; Arachnida; Acari; Parasitiformes; Ixodida; Ixodoidea; Ixodidae; Ixodinae; Ixodes.	M	M	304	conserved hypothetical protein	ExpAA=0.00 First60=0.00 PredHel=0 Topology=o	0					SIG	26-27	31.554	6.21	28.718	5.38	KTS_cys disintegrin |	1	conserved hypothetical protein	1E-166	gi|241631810	589	303	304	100	100	Ixodes scapularis	Protein FAM185A	1E-008	sp|Q8N0U4|F185A_HUMAN	60.5	313	392	22	80	Homo sapiens	DUF2807	2.6	POLXc	1.8	COG3595	0.39	COG3595 | IcmF | NUP170 | LLM_2I7G | PHA03207 | PLN02979 | PRK03739 | PRK02925 |	146	2	161
gi|241629323	gi|241629323	Ixodes scapularis	Eukaryota; Metazoa; Arthropoda; Chelicerata; Arachnida; Acari; Parasitiformes; Ixodida; Ixodoidea; Ixodidae; Ixodinae; Ixodes.	R	R	90	antigen 5/SCP domain-containing protein, putative	ExpAA=0.01 First60=0.01 PredHel=0 Topology=o	0					CYT		10.013	8.68			RGD_cys disintegrin |	1	antigen 5/SCP domain-containing protein, putative	1E-047	gi|241629323	192	89	90	100	100	Ixodes scapularis	Venom allergen 3	1E-008	sp|P35779|VA3_SOLRI	58.2	89	211	38	43	Solenopsis richteri	CAP	7E-009	SCP	2E-018	SCP	2E-016	SCP 2e-016| SCP_euk 1e-013| SCP_CRISP 2e-011| SCP_GAPR-1_like 1e-009| SCP_PR-1_like 6e-009| CAP 3e-008| SCP_GLIPR-1_like 4e-008| SCP 2e-007| SCP_PRY1_like 1e-006| SCP_HrTT-1 4e-005|	147	2	162
gi|241626477	gi|241626477	Ixodes scapularis	Eukaryota; Metazoa; Arthropoda; Chelicerata; Arachnida; Acari; Parasitiformes; Ixodida; Ixodoidea; Ixodidae; Ixodinae; Ixodes.	R	R	871	protein phosphatase 2A regulatory subunit A, putative	ExpAA=0.21 First60=0.18 PredHel=0 Topology=o	0					CYT		97.742	5.63			RTS_cys disintegrin |	1	protein phosphatase 2A regulatory subunit A, putative	0.0	gi|241626477	1759	870	871	100	100	Ixodes scapularis	Serine/threonine-protein phosphatase 4 regulatory subunit 1	1E-143	sp|Q8TF05|PP4R1_HUMAN	510	868	950	37	91	Homo sapiens	BSP_II	0.012	BPI1	0.23	BSP_II	0.068	BSP_II 0.068| HEAT | HTH_HMRTR_unk | DUF3528 | 17 | STKc_SGK2 | PLN02816 | PRK08491 | PTKc_EphR_A10 | IgC_Tapasin_R |	148	2	163
gi|241626256	gi|241626256	Ixodes scapularis	Eukaryota; Metazoa; Arthropoda; Chelicerata; Arachnida; Acari; Parasitiformes; Ixodida; Ixodoidea; Ixodidae; Ixodinae; Ixodes.	C	C	1278	laminin gamma-1 chain, putative	ExpAA=0.07 First60=0.00 PredHel=0 Topology=o	0					CYT		142.787	6.54			KGD_cys disintegrin |	1	laminin gamma-1 chain, putative	0.0	gi|241626256	2680	1277	1278	100	100	Ixodes scapularis	Laminin subunit gamma-1	0.0	sp|P15215|LAMC1_DROME	1038	1352	1639	42	83	Drosophila melanogaster	Laminin_B	1E-024	LamB	4E-026	Laminin_B	6E-024	Laminin_B 6e-024| LamB 7e-024| Laminin_EGF 3e-012| EGF_Lam 3e-012| SMC_prok_B 1e-011| Smc 9e-011| SbcC 1e-008| EGF_Lam 1e-008| PRK02224 5e-008| PTZ00121 2e-007|	149	2	164
gi|241622405	gi|241622405	Ixodes scapularis	Eukaryota; Metazoa; Arthropoda; Chelicerata; Arachnida; Acari; Parasitiformes; Ixodida; Ixodoidea; Ixodidae; Ixodinae; Ixodes.	Q	Q	737	enhancer of zeste, ezh, putative	ExpAA=0.11 First60=0.00 PredHel=0 Topology=o	0					CYT		85.225	7.66			ECD_cys disintegrin |	1	enhancer of zeste, ezh, putative	0.0	gi|241622405	1543	736	737	100	100	Ixodes scapularis	Histone-lysine N-methyltransferase EZH2	0.0	sp|Q4R381|EZH2_MACFA	812	729	746	55	98	Macaca fascicularis	SET	1E-023	SET	8E-032	SET	1E-029	SET 1e-029| SET 6e-023| COG2940 6e-014| PLN03123 | DMP1 | TIGR02600 | COG4499 | WXG100 | WXG100_ESAT6 | M3_not_pepF |	150	2	165
gi|241620376	gi|241620376	Ixodes scapularis	Eukaryota; Metazoa; Arthropoda; Chelicerata; Arachnida; Acari; Parasitiformes; Ixodida; Ixodoidea; Ixodidae; Ixodinae; Ixodes.	M	M	212	hypothetical protein IscW_ISCW009271	ExpAA=21.23 First60=21.23 PredHel=1 Topology=i7-29o	1	10.4	86.3	3.3		BL	-1	22.938	4.87			RGD_cys disintegrin |	1	hypothetical protein IscW_ISCW009271	1E-118	gi|241620376	428	211	212	100	100	Ixodes scapularis	Translation initiation factor IF-2	0.033	sp|B3PXE3|IF2_RHIE6	38.5	115	917	30	13	Rhizobium etli (strain CIAT 652)	CALCOCO1	0.20	HTH_LACI	1.1	SMC_prok_B	0.63	SMC_prok_B | CALCOCO1 | CDC37_N | PRK10093 | R3H_RRM | TAF4 | PLN03214 | PRK08294 | Adenylation_DNA_ligase_Bac1 | PRK06486 |	151	2	166
gi|241620045	gi|241620045	Ixodes scapularis	Eukaryota; Metazoa; Arthropoda; Chelicerata; Arachnida; Acari; Parasitiformes; Ixodida; Ixodoidea; Ixodidae; Ixodinae; Ixodes.	S	S	320	WNT-2 precursor, putative	ExpAA=0.06 First60=0.00 PredHel=0 Topology=o	0					CYT		36.313	9.66			RED_cys disintegrin |	1	WNT-2 precursor, putative	0.0	gi|241620045	690	319	320	100	100	Ixodes scapularis	Proto-oncogene Wnt-1	1E-120	sp|P04426|WNT1_MOUSE	432	306	370	61	83	Mus musculus	wnt	1E-130	WNT1	1E-124	wnt	1E-129	wnt e-129| WNT1 e-122| ADA | nspC | STKc_YPK1_like | PLDc_SF | Peptidases_S8_subtilisin_Vpr-like | Phospholip_A2_3 | PRK15483 | alk_sulf_monoox |	13	5	16
gi|241618557	gi|241618557	Ixodes scapularis	Eukaryota; Metazoa; Arthropoda; Chelicerata; Arachnida; Acari; Parasitiformes; Ixodida; Ixodoidea; Ixodidae; Ixodinae; Ixodes.	S	S	1096	myosin IA, putative	ExpAA=0.08 First60=0.05 PredHel=0 Topology=o	0					CYT		126.186	9.28			MLD_cys disintegrin |	1	myosin IA, putative	0.0	gi|241618557	2212	1095	1096	100	100	Ixodes scapularis	Myosin-Ib	0.0	sp|Q05096|MYO1B_RAT	1024	1085	1136	47	96	Rattus norvegicus	Myosin_head	0.0	MYSc	0.0	MYSc_type_I	0.0	MYSc_type_I | MYSc | Myosin_head | MYSc | COG5022 | MYSc_type_II e-170| MYSc_type_VII e-161| MYSc_type_V e-154| MYSc_type_XI e-153| MYSc_type_XV e-137|	22	4	24
gi|241610139	gi|241610139	Ixodes scapularis	Eukaryota; Metazoa; Arthropoda; Chelicerata; Arachnida; Acari; Parasitiformes; Ixodida; Ixodoidea; Ixodidae; Ixodinae; Ixodes.	M	M	60	RGD containing protein, putative	ExpAA=9.92 First60=9.92 PredHel=0 Topology=o	0					SIG	16-17	6.916	6.67	5.289	6.87	RGD_cys disintegrin |	1	RGD containing protein, putative	7E-031	gi|241610139	137	59	60	100	100	Ixodes scapularis	Toxin Gsg9.1	0.85	sp|P0C846|C91_GEMSO	32.3	44	82	33	55	Gemmula sogodensis	DUF1646	0.18	PINc	1.1	DUF1646	0.83	DUF1646 | PRK13024 | PRK05818 | Enhancin | PRK07198 | ND1 |	1	142	3
gi|241609110	gi|241609110	Ixodes scapularis	Eukaryota; Metazoa; Arthropoda; Chelicerata; Arachnida; Acari; Parasitiformes; Ixodida; Ixodoidea; Ixodidae; Ixodinae; Ixodes.	R	R	279	conserved hypothetical protein	ExpAA=0.11 First60=0.00 PredHel=0 Topology=o	0					CYT		30.553	6.2			KTS_cys disintegrin |	1	conserved hypothetical protein	1E-158	gi|241609110	562	278	279	100	100	Ixodes scapularis	Putative deoxyribonuclease TATDN1	6E-084	sp|Q6GML7|TATD1_DANRE	310	268	298	57	90	Danio rerio	TatD_DNase	7E-041	MoCF_biosynth	0.79	TatD_DNAse	3E-050	TatD_DNAse 3e-050| TatD 2e-044| TatD_DNase 3e-040| TIGR00010 3e-032| PRK10425 2e-030| PRK11449 6e-019| PRK10812 2e-011| COG1099 0.002| PRK14042 0.022| DUF719 |	23	4	25
gi|241608047	gi|241608047	Ixodes scapularis	Eukaryota; Metazoa; Arthropoda; Chelicerata; Arachnida; Acari; Parasitiformes; Ixodida; Ixodoidea; Ixodidae; Ixodinae; Ixodes.	I	I	101	hypothetical protein IscW_ISCW009746	ExpAA=0.00 First60=0.00 PredHel=0 Topology=o	0					CYT		11.205	9.55			RED_cys disintegrin |	1	hypothetical protein IscW_ISCW009746	5E-056	gi|241608047	220	100	101	100	100	Ixodes scapularis	YLP motif-containing protein 1	0.020	sp|Q9R0I7|YLPM1_MOUSE	37.7	856	1386	31	62	Mus musculus	Adeno_terminal	0.021	HELICc3	0.24	Adeno_terminal	0.10	Adeno_terminal | PRK14552 | DUF572 | PTZ00437 | SIK1 | TIGR02677 | BchD-ChlD | oculospanin_like_LEL |	152	2	167
gi|241607958	gi|241607958	Ixodes scapularis	Eukaryota; Metazoa; Arthropoda; Chelicerata; Arachnida; Acari; Parasitiformes; Ixodida; Ixodoidea; Ixodidae; Ixodinae; Ixodes.	M	M	432	hypothetical protein IscW_ISCW008899	ExpAA=0.02 First60=0.01 PredHel=0 Topology=o	0					SIG	20-21	46.314	6.24	43.97	6	RTS_cys disintegrin |	1	hypothetical protein IscW_ISCW008899	0.0	gi|241607958	921	431	432	100	100	Ixodes scapularis	Putative keratin-associated protein 10-like ENSP00000375147 homolog	3E-005	sp|A2A5X5|KR10D_MOUSE	50.1	325	502	24	65	Mus musculus	PAT1	0.008	Amelogenin	0.35	PAT1	0.041	PAT1 0.041| PRK03427 | PABP-1234 | ZipA | COG3520 | dnaA | PRK10263 |	153	2	168
gi|241606928	gi|241606928	Ixodes scapularis	Eukaryota; Metazoa; Arthropoda; Chelicerata; Arachnida; Acari; Parasitiformes; Ixodida; Ixodoidea; Ixodidae; Ixodinae; Ixodes.	C	C	362	chitin binding peritrophin-A, putative	ExpAA=0.00 First60=0.00 PredHel=0 Topology=o	0					CYT		38.963	4.57			KTS_cys disintegrin |	1	chitin binding peritrophin-A, putative	0.0	gi|241606928	788	361	362	100	100	Ixodes scapularis	Chondroitin proteoglycan 1	7E-016	sp|A8WVU7|CPG1_CAEBR	85.1	586	686	29	86	Caenorhabditis briggsae	CBM_14	3E-008	ChtBD2	2E-007	CBM_14	1E-007	CBM_14 1e-007| PHA03378 5e-007| PRK07764 1e-006| DUF605 7e-006| ChtBD2 2e-005| Herpes_LMP2 1e-004| PHA03247 7e-004| PHA03307 0.004| Herpes_gp2 0.005| dnaA 0.007|	154	2	169
gi|241606431	gi|241606431	Ixodes scapularis	Eukaryota; Metazoa; Arthropoda; Chelicerata; Arachnida; Acari; Parasitiformes; Ixodida; Ixodoidea; Ixodidae; Ixodinae; Ixodes.	K	K	474	hexosaminidase domain-containing protein, putative	ExpAA=0.04 First60=0.00 PredHel=0 Topology=o	0					CYT		53.754	7.12			MLD_cys disintegrin |	1	hexosaminidase domain-containing protein, putative	0.0	gi|241606431	978	473	474	100	100	Ixodes scapularis	Hexosaminidase D	5E-087	sp|Q8WVB3|HEXDC_HUMAN	322	464	486	41	96	Homo sapiens	Glyco_hydro_20	6E-015	AMA-1	0.56	GH20_GcnA-like	1E-087	GH20_GcnA-like 1e-087| Glyco_hydro_20 3e-014| GH20_hexosaminidase 1e-010| GH20_chitobiase-like 1e-010| Chb 5e-008| GH20_DspB_LnbB-like 9e-006| Nitrogenase_NifN_2 0.001| GH20_chitobiase-like_1 0.013| DeoC | PLN03110 |	155	2	170
gi|241597921	gi|241597921	Ixodes scapularis	Eukaryota; Metazoa; Arthropoda; Chelicerata; Arachnida; Acari; Parasitiformes; Ixodida; Ixodoidea; Ixodidae; Ixodinae; Ixodes.	M	M	588	conserved hypothetical protein	ExpAA=0.44 First60=0.36 PredHel=0 Topology=o	0					SIG	27-28	64.944	9.7	61.879	9.56	RGD_cys disintegrin |	1	conserved hypothetical protein	0.0	gi|241597921	1192	587	588	100	100	Ixodes scapularis	Glycogen synthase kinase-3 beta	1E-142	sp|P49841|GSK3B_HUMAN	507	387	420	55	92	Homo sapiens	Pkinase	7E-036	S_TKc	2E-036	PTZ00036	6E-084	PTZ00036 6e-084| STKc_CDK_like 6e-051| STKc_MAPK 7e-047| STKc_CCRK 1e-044| STKc_ERK1_2_like 6e-038| STKc_CDK7 9e-035| STKc_CdkB_plant 9e-035| STKc_Pho85 3e-030| PLN00009 2e-029| STKc_MAPK4_6 2e-029|	156	2	171
gi|241594092	gi|241594092	Ixodes scapularis	Eukaryota; Metazoa; Arthropoda; Chelicerata; Arachnida; Acari; Parasitiformes; Ixodida; Ixodoidea; Ixodidae; Ixodinae; Ixodes.	F	F	334	phosphoribosylpyrophosphate synthetase-associated protein, putative	ExpAA=0.32 First60=0.01 PredHel=0 Topology=o	0					CYT		36.995	7.69			KTS_cys disintegrin |	1	phosphoribosylpyrophosphate synthetase-associated protein, putative	0.0	gi|241594092	660	333	334	100	100	Ixodes scapularis	Phosphoribosyl pyrophosphate synthase-associated protein 2	1E-136	sp|Q5ZL26|KPRB_CHICK	484	328	369	74	89	Gallus gallus	Pribosyltran	0.30	CheW	1.3	PrsA	2E-076	PrsA 2e-076| PRK01259 2e-074| ribP_PPkin 4e-068| PRK02269 4e-054| PRK02458 7e-054| PLN02369 4e-053| PRK04923 5e-053| PTZ00145 6e-050| PRK03092 5e-049| PRK02812 4e-048|	157	2	172
gi|241591634	gi|241591634	Ixodes scapularis	Eukaryota; Metazoa; Arthropoda; Chelicerata; Arachnida; Acari; Parasitiformes; Ixodida; Ixodoidea; Ixodidae; Ixodinae; Ixodes.	Q	Q	653	hypothetical protein IscW_ISCW019333	ExpAA=0.00 First60=0.00 PredHel=0 Topology=o	0					CYT		70.362	9.26			RED_cys disintegrin |	1	hypothetical protein IscW_ISCW019333	0.0	gi|241591634	1409	652	653	100	100	Ixodes scapularis	Protein charlatan	8E-055	sp|Q7YU81|CHN_DROME	215	410	1214	40	34	Drosophila melanogaster	DUF3505	0.13	ZnF_C2H2	0.17	TrbL	0.087	TrbL 0.087| PriA | STKc_NDR_like | ComEB | PTZ00303 | DUF3505 | TEBP_beta | COG5048 | PRK07003 | PRK13875 |	158	2	173
gi|241575672	gi|241575672	Ixodes scapularis	Eukaryota; Metazoa; Arthropoda; Chelicerata; Arachnida; Acari; Parasitiformes; Ixodida; Ixodoidea; Ixodidae; Ixodinae; Ixodes.	H	H	225	WNT-2 precursor, putative	ExpAA=0.00 First60=0.00 PredHel=0 Topology=o	0					CYT		24.93	9.69			KTS_cys disintegrin |	1	WNT-2 precursor, putative	1E-134	gi|241575672	480	224	225	100	100	Ixodes scapularis	Protein Wnt-5b	7E-059	sp|Q06443|WNT5B_AMBME	226	214	357	51	60	Ambystoma mexicanum	wnt	3E-066	WNT1	7E-061	wnt	1E-065	wnt 1e-065| WNT1 7e-059| pp-GalNAc-T | PTK_Jak2_Jak3_rpt1 | COG5290 | c_cpa1 | PLN02530 | PRK08266 |	13	5	16
gi|241572918	gi|241572918	Ixodes scapularis	Eukaryota; Metazoa; Arthropoda; Chelicerata; Arachnida; Acari; Parasitiformes; Ixodida; Ixodoidea; Ixodidae; Ixodinae; Ixodes.	C	C	665	fibropellin-1, putative	ExpAA=0.00 First60=0.00 PredHel=0 Topology=o	0					CYT		69.832	4.34			RGD_cys disintegrin |	1	fibropellin-1, putative	0.0	gi|241572918	1526	664	665	100	100	Ixodes scapularis	Fibropellin-1	1E-176	sp|P10079|FBP1_STRPU	618	917	1064	41	86	Strongylocentrotus purpuratus	EGF	0.33	EGF_CA	4E-005	EGF_CA	0.005	EGF_CA 0.005| EGF_CA 0.010| EGF | EGF_CA | Plasmod_Pvs28 | EGF | EGF_3 |	8	8	26
gi|241572014	gi|241572014	Ixodes scapularis	Eukaryota; Metazoa; Arthropoda; Chelicerata; Arachnida; Acari; Parasitiformes; Ixodida; Ixodoidea; Ixodidae; Ixodinae; Ixodes.	M	M	65	secreted salivary gland peptide, putative	ExpAA=21.46 First60=21.46 PredHel=1 Topology=o4-26i	1	33.8	6.2	60		SIG	22-23	7.431	8.86	4.854	8.89	WGD_cys disintegrin |	1	secreted salivary gland peptide, putative	9E-033	gi|241572014	143	64	65	100	100	Ixodes scapularis	Antimicrobial peptide ISAMP	1E-021	sp|Q8MVA6|ISAMP_IXOSC	101	68	69	68	100	Ixodes scapularis	ESSS	1.1	Cog4	0.42	ESSS	5.1	ESSS | PRK12269 | COG3759 |	1	142	3
gi|241571724	gi|241571724	Ixodes scapularis	Eukaryota; Metazoa; Arthropoda; Chelicerata; Arachnida; Acari; Parasitiformes; Ixodida; Ixodoidea; Ixodidae; Ixodinae; Ixodes.	Y	Y	667	EGF-like domain-containing protein, putative	ExpAA=0.00 First60=0.00 PredHel=0 Topology=o	0					CYT		71.63	6.25			ECD_cys disintegrin |WGD_cys disintegrin |	2	EGF-like domain-containing protein, putative	0.0	gi|241571724	1579	666	667	100	100	Ixodes scapularis	Multiple epidermal growth factor-like domains protein 10	0.0	sp|Q96KG7|MEG10_HUMAN	687	791	1140	39	69	Homo sapiens	EMI	8E-006	EGF_Lam	0.057	EMI	5E-005	EMI 5e-005| EGF_Lam | Laminin_EGF |	8	8	26
gi|241570973	gi|241570973	Ixodes scapularis	Eukaryota; Metazoa; Arthropoda; Chelicerata; Arachnida; Acari; Parasitiformes; Ixodida; Ixodoidea; Ixodidae; Ixodinae; Ixodes.	M	M	348	acetylcholinesterase, putative	ExpAA=0.03 First60=0.02 PredHel=0 Topology=o	0					SIG	21-22	39.095	8.38	36.814	7.77	RGD_cys disintegrin |	1	acetylcholinesterase, putative	0.0	gi|241570973	715	347	348	100	100	Ixodes scapularis	Acetylcholinesterase	2E-016	sp|Q27677|ACES_LEPDE	87	542	629	31	86	Leptinotarsa decemlineata	COesterase	2E-025	CBD_IV	1.4	COesterase	9E-025	COesterase 9e-025| Esterase_lipase 2e-018| PnbA 7e-014| PRK14845 | ALDH_F1L_FTFDH | PRK12389 | PBP2_HcaR | PBP1_GPC6A_like | PLN00149 | PRK13511 |	159	2	174
gi|241570963	gi|241570963	Ixodes scapularis	Eukaryota; Metazoa; Arthropoda; Chelicerata; Arachnida; Acari; Parasitiformes; Ixodida; Ixodoidea; Ixodidae; Ixodinae; Ixodes.	M	M	518	acetylcholinesterase, putative	ExpAA=9.12 First60=2.65 PredHel=0 Topology=o	0					SIG	18-19	57.094	5.28	55.246	5.28	VGD_cys disintegrin |	1	acetylcholinesterase, putative	0.0	gi|241570963	1045	517	518	100	100	Ixodes scapularis	Acetylcholinesterase	6E-062	sp|P04058|ACES_TORCA	238	473	586	33	81	Torpedo californica	COesterase	1E-113	UME	1.0	COesterase	1E-112	COesterase e-112| Esterase_lipase 8e-091| PnbA 6e-070| Aes 2e-009| Abhydrolase_3 1e-006| ACS_1 0.087| PRK05301 | COG1151 | nifH | COG0400 |	9	7	12
gi|241568223	gi|241568223	Ixodes scapularis	Eukaryota; Metazoa; Arthropoda; Chelicerata; Arachnida; Acari; Parasitiformes; Ixodida; Ixodoidea; Ixodidae; Ixodinae; Ixodes.	L	L	75	forkhead domain-containing protein, putative	ExpAA=0.02 First60=0.02 PredHel=0 Topology=o	0					CYT		8.709	8.68			RED_cys disintegrin |	1	forkhead domain-containing protein, putative	7E-039	gi|241568223	163	74	75	100	100	Ixodes scapularis	Forkhead box protein L2	6E-021	sp|Q6VFT5|FOXL2_RABIT	99.4	74	384	56	20	Oryctolagus cuniculus	Fork_head	2E-030	FH	2E-030	Fork_head	8E-030	Fork_head 8e-030| FH 2e-028| FH 8e-027| COG5025 1e-015| PHA02867 | Nab6_mRNP_bdg | UFD2 | DUF1284 | arsM |	160	2	175
gi|241568200	gi|241568200	Ixodes scapularis	Eukaryota; Metazoa; Arthropoda; Chelicerata; Arachnida; Acari; Parasitiformes; Ixodida; Ixodoidea; Ixodidae; Ixodinae; Ixodes.	G	G	164	hypothetical protein IscW_ISCW019388	ExpAA=0.01 First60=0.00 PredHel=0 Topology=o	0					CYT		18.126	9.75			RTS_cys disintegrin |	1	hypothetical protein IscW_ISCW019388	2E-095	gi|241568200	351	163	164	100	100	Ixodes scapularis	Putative nuclease HARBI1	0.12	sp|Q6AZB8|HARB1_DANRE	35.8	36	349	37	11	Danio rerio	UDPGP	2.6	RPR	0.65	ToxGAP	3.1	ToxGAP | PRK10927 |	161	2	176
gi|241566000	gi|241566000	Ixodes scapularis	Eukaryota; Metazoa; Arthropoda; Chelicerata; Arachnida; Acari; Parasitiformes; Ixodida; Ixodoidea; Ixodidae; Ixodinae; Ixodes.	V	V	160	hypothetical protein IscW_ISCW008164	ExpAA=4.28 First60=3.74 PredHel=0 Topology=o	0					CYT		18.289	8.31			RTS_cys disintegrin |	1	hypothetical protein IscW_ISCW008164	1E-091	gi|241566000	338	159	160	100	100	Ixodes scapularis	Glycyl-tRNA synthetase beta subunit	0.73	sp|B7M3I1|SYGB_ECO8A	33.1	74	689	29	11	Escherichia coli O8 (strain IAI1)	Pox_vIL-18BP	0.10	ChSh	0.14	Pox_vIL-18BP	0.49	Pox_vIL-18BP | PolY_Pol_eta | PRK05297 | SIS_RpiR | PAT1 | s48_45 | hydroxyacyl_CoA_DH |	162	2	177
gi|241561155	gi|241561155	Ixodes scapularis	Eukaryota; Metazoa; Arthropoda; Chelicerata; Arachnida; Acari; Parasitiformes; Ixodida; Ixodoidea; Ixodidae; Ixodinae; Ixodes.	V	V	422	hypothetical protein IscW_ISCW019942	ExpAA=1.07 First60=0.52 PredHel=0 Topology=o	0					CYT		46.502	9.4			RED_cys disintegrin |	1	hypothetical protein IscW_ISCW019942	0.0	gi|241561155	847	421	422	100	100	Ixodes scapularis	Putative ribosomal RNA methyltransferase NOP2	0.82	sp|P46087|NOP2_HUMAN	35.4	161	812	24	20	Homo sapiens	SEN1_N	0.99	EGF_Lam	1.9	PTZ00477	0.12	PTZ00477 | COG5028 | PRK05320 | PRK11462 | PRK14970 | SEN1_N | PRK10446 | DUF499 | rad50 | PRK08298 |	163	2	178
gi|241560341	gi|241560341	Ixodes scapularis	Eukaryota; Metazoa; Arthropoda; Chelicerata; Arachnida; Acari; Parasitiformes; Ixodida; Ixodoidea; Ixodidae; Ixodinae; Ixodes.	M	M	210	conserved hypothetical protein	ExpAA=0.06 First60=0.01 PredHel=0 Topology=o	0					SIG	25-26	23.811	8.57	20.913	8.44	RTS_cys disintegrin |	1	conserved hypothetical protein	1E-118	gi|241560341	428	209	210	100	100	Ixodes scapularis	L-seryl-tRNA(Sec) kinase	1E-015	sp|Q8BP74|PSTK_MOUSE	83.2	97	359	42	27	Mus musculus	KTI12	5E-010	NEUZ	3.3	selen_PSTK_euk	1E-017	selen_PSTK_euk 1e-017| COG4088 1e-010| KTI12 2e-009| selen_PSTK 4e-008| pseT 0.069| entF | PBP1_LacI_like_7 | PTZ00441 | PNK-3'Pase | PHA02682 |	164	2	179
gi|241557818	gi|241557818	Ixodes scapularis	Eukaryota; Metazoa; Arthropoda; Chelicerata; Arachnida; Acari; Parasitiformes; Ixodida; Ixodoidea; Ixodidae; Ixodinae; Ixodes.	M	M	464	UDP-GalNAc:polypeptide N-acetylgalactosaminyl transferase, putative	ExpAA=18.76 First60=18.62 PredHel=1 Topology=i13-30o	1	3.7	93.5	2.8		SIG	27-28	52.638	9.22	49.658	8.9	RED_cys disintegrin |	1	UDP-GalNAc:polypeptide N-acetylgalactosaminyl transferase, putative	0.0	gi|241557818	956	463	464	100	100	Ixodes scapularis	Polypeptide N-acetylgalactosaminyltransferase 1	1E-119	sp|Q6WV20|GALT1_DROME	428	426	601	50	71	Drosophila melanogaster	Glycos_transf_2	2E-021	AHS1	1.9	pp-GalNAc-T	1E-137	pp-GalNAc-T e-137| Glycos_transf_2 1e-020| actino_glycTran 2e-011| COG1215 3e-010| Glyco_tranf_GTA_type 4e-010| DPM_DPG-synthase_like 4e-008| GT_2_like_e 5e-006| COG1216 7e-006| WcaA 1e-005| CESA_like_1 4e-005|	165	2	180
gi|241404315	gi|241404315	Ixodes scapularis	Eukaryota; Metazoa; Arthropoda; Chelicerata; Arachnida; Acari; Parasitiformes; Ixodida; Ixodoidea; Ixodidae; Ixodinae; Ixodes.	I	I	199	phospholipase A2 precursor, putative	ExpAA=0.28 First60=0.26 PredHel=0 Topology=o	0					CYT		22.334	8.88			RTS_cys disintegrin |	1	phospholipase A2 precursor, putative	1E-115	gi|241404315	418	198	199	100	100	Ixodes scapularis	Phospholipase A2 isozyme PA4	3E-024	sp|P80003|PA22_HELSU	111	101	142	47	72	Heloderma suspectum	Phospholip_A2_2	1E-032	PA2c	2E-005	PLA2_bee_venom_	3E-034	PLA2_bee_venom_like 3e-034| Phospholip_A2_2 6e-032| PLA2_like 2e-006| PLA2_group_III_like 8e-004| PA2c 0.002| PLA2_plant | PHA03275 | IRR1 | PTZ00147 | PRK08210 |	166	2	181
gi|241390516	gi|241390516	Ixodes scapularis	Eukaryota; Metazoa; Arthropoda; Chelicerata; Arachnida; Acari; Parasitiformes; Ixodida; Ixodoidea; Ixodidae; Ixodinae; Ixodes.	N	N	329	mucin, putative	ExpAA=0.00 First60=0.00 PredHel=0 Topology=o	0					CYT		37.365	9.19			MLD_cys disintegrin |	1	mucin, putative	0.0	gi|241390516	714	328	329	100	100	Ixodes scapularis	BMP-binding endothelial regulator protein	3E-071	sp|Q8N8U9|BMPER_HUMAN	268	439	685	41	64	Homo sapiens	VWD	1E-030	VWD	2E-036	VWD	2E-034	VWD 2e-034| VWD 5e-030| C8 2e-015| C8 6e-013| VWC 3e-004| VWC 6e-004| minD_bact | MinD | butanediol_DH_like | rluA_subfam |	167	2	182
gi|241301792	gi|241301792	Ixodes scapularis	Eukaryota; Metazoa; Arthropoda; Chelicerata; Arachnida; Acari; Parasitiformes; Ixodida; Ixodoidea; Ixodidae; Ixodinae; Ixodes.	I	I	1937	DNA-directed RNA polymerase II largest subunit, putative	ExpAA=0.04 First60=0.00 PredHel=0 Topology=o	0					CYT		212.877	8.34			MLD_cys disintegrin |	1	DNA-directed RNA polymerase II largest subunit, putative	0.0	gi|241301792	3925	1936	1937	100	100	Ixodes scapularis	DNA-directed RNA polymerase II subunit RPB1	0.0	sp|P08775|RPB1_MOUSE	3176	1955	1970	77	99	Mus musculus	RNA_pol_Rpb1_1	1E-119	RPOLA_N	1E-147	PRK08566	0.0	PRK08566 | RNA_pol_rpoA1 | RNAP_II_Rpb1_C | RpoC | PRK14977 | RPOLA_N e-145| RNA_pol_Rpb1_1 e-118| RNA_pol_Rpb1_5 7e-092| PRK04309 3e-083| RNAP_A'' 3e-083|	33	3	37
gi|241298448	gi|241298448	Ixodes scapularis	Eukaryota; Metazoa; Arthropoda; Chelicerata; Arachnida; Acari; Parasitiformes; Ixodida; Ixodoidea; Ixodidae; Ixodinae; Ixodes.	M	M	62	secreted salivary gland peptide, putative	ExpAA=1.38 First60=1.38 PredHel=0 Topology=o	0					SIG	19-20	6.761	4.4	4.833	4.59	RGD_cys disintegrin |	1	secreted salivary gland peptide, putative	5E-032	gi|241298448	140	61	62	100	100	Ixodes scapularis	Metallothionein-2	0.39	sp|P17808|MT2_MESAU	33.5	19	61	50	33	Mesocricetus auratus	Nepo_coat	1.4	DAGKa	2.1	PRK05250	3.2	PRK05250 | PRK09818 | Nepo_coat |	1	142	3
gi|241286596	gi|241286596	Ixodes scapularis	Eukaryota; Metazoa; Arthropoda; Chelicerata; Arachnida; Acari; Parasitiformes; Ixodida; Ixodoidea; Ixodidae; Ixodinae; Ixodes.	D	D	1586	hypothetical protein IscW_ISCW004579	ExpAA=0.01 First60=0.00 PredHel=0 Topology=o	0					CYT		179.336	5.84			KGD_cys disintegrin |	1	hypothetical protein IscW_ISCW004579	0.0	gi|241286596	3148	1585	1586	100	100	Ixodes scapularis	Kinetochore-associated protein 1	6E-081	sp|Q8C3Y4|KNTC1_MOUSE	303	1706	2207	21	77	Mus musculus	Rod_C	8E-022	SNc	4.9	Rod_C	5E-021	Rod_C 5e-021| ileS | ileS | chaperonin_type_I_II | apcE |	168	2	183
gi|241255038	gi|241255038	Ixodes scapularis	Eukaryota; Metazoa; Arthropoda; Chelicerata; Arachnida; Acari; Parasitiformes; Ixodida; Ixodoidea; Ixodidae; Ixodinae; Ixodes.	L	L	118	cytochrome P450, putative	ExpAA=6.13 First60=0.47 PredHel=0 Topology=o	0					CYT		12.971	6.74			RTS_cys disintegrin |	1	cytochrome P450, putative	1E-063	gi|241255038	245	117	118	100	100	Ixodes scapularis	Cytochrome P450 3A1	2E-021	sp|P04800|CP3A1_RAT	100	107	504	40	21	Rattus norvegicus	p450	5E-025	Alpha-L-AF_C	0.66	p450	2E-024	p450 2e-024| CypX 2e-015| PTZ00404 3e-010| PLN02183 1e-009| PLN02290 2e-009| PLN02936 2e-009| PLN02302 1e-008| PLN02655 2e-008| PLN00110 3e-008| PLN02394 4e-008|	169	2	184
gi|241253716	gi|241253716	Ixodes scapularis	Eukaryota; Metazoa; Arthropoda; Chelicerata; Arachnida; Acari; Parasitiformes; Ixodida; Ixodoidea; Ixodidae; Ixodinae; Ixodes.	V	V	64	hypothetical protein IscW_ISCW024246	ExpAA=0.27 First60=0.27 PredHel=0 Topology=o	0					CYT		7.468	9.14			RGD_cys disintegrin |	1	hypothetical protein IscW_ISCW024246	6E-030	gi|241253716	134	63	64	100	100	Ixodes scapularis	NADH-ubiquinone oxidoreductase chain 5	2.5	sp|Q37372|NU5M_ACACA	30.8	32	675	48	5	Acanthamoeba castellanii	BssC_TutF	9.7	Aamy	1.2	GH18_IDGF	2.7	GH18_IDGF | PLN02525 | PRK07883 |	19	4	185
gi|241250792	gi|241250792	Ixodes scapularis	Eukaryota; Metazoa; Arthropoda; Chelicerata; Arachnida; Acari; Parasitiformes; Ixodida; Ixodoidea; Ixodidae; Ixodinae; Ixodes.	L	L	231	bone morphogenetic protein antagonist noggin, putative	ExpAA=0.01 First60=0.00 PredHel=0 Topology=o	0					SIG	17-18	26.687	10.52	25.068	10.52	KTS_cys disintegrin |	1	bone morphogenetic protein antagonist noggin, putative	1E-138	gi|241250792	495	230	231	100	100	Ixodes scapularis	Noggin-2	2E-043	sp|Q9W740|NOGG2_DANRE	176	183	212	42	87	Danio rerio	Noggin	6E-050	MA	0.18	Noggin	3E-049	Noggin 3e-049| PRK11460 | PRK14056 | PAP2_glucose_6_phosphatase | glyS | edd | PRK10106 | ETR_like_2 | RhoGAP_GMIP | anthran_1_2_B |	170	2	186
gi|241250787	gi|241250787	Ixodes scapularis	Eukaryota; Metazoa; Arthropoda; Chelicerata; Arachnida; Acari; Parasitiformes; Ixodida; Ixodoidea; Ixodidae; Ixodinae; Ixodes.	M	M	131	secreted protein, putative	ExpAA=20.67 First60=20.67 PredHel=1 Topology=o5-27i	1	16.8	3.8	79.4		SIG	29-30	14.278	5.55	11.47	5.4	KGD_cys disintegrin |	1	secreted protein, putative	4E-071	gi|241250787	270	130	131	100	100	Ixodes scapularis	Aspartyl-tRNA synthetase	0.65	sp|A6GWB6|SYD_FLAPJ	32.7	57	583	30	10	Flavobacterium psychrophilum (strain JIP02/86 / ATCC 49511)	DUF1774	0.15	BAG	0.82	DUF1774	0.63	DUF1774 | Endonuc-PvuII | LMO_FMN | LOX_like_FMN | PTZ00299 | PLN02903 | HemC | BioY | PRK06839 |	171	2	187
gi|241177338	gi|241177338	Ixodes scapularis	Eukaryota; Metazoa; Arthropoda; Chelicerata; Arachnida; Acari; Parasitiformes; Ixodida; Ixodoidea; Ixodidae; Ixodinae; Ixodes.	M	M	501	D-lactate dehydrognease 2, putative	ExpAA=0.01 First60=0.00 PredHel=0 Topology=o	0					BL	25-26	54.761	5.89	52.069	5.46	VGD_cys disintegrin |	1	D-lactate dehydrognease 2, putative	0.0	gi|241177338	988	500	501	100	100	Ixodes scapularis	D-2-hydroxyglutarate dehydrogenase, mitochondrial	1E-148	sp|Q1JPD3|D2HDH_BOVIN	525	480	544	54	88	Bos taurus	FAD-oxidase_C	3E-051	DEXDc3	0.87	GlcD	2E-086	GlcD 2e-086| glcD 8e-073| FAD-oxidase_C 2e-050| PLN02805 1e-042| PRK11230 3e-042| FAD_binding_4 1e-029| PRK11183 4e-011| FAD_lactone_ox 9e-007| pln_FAD_oxido 9e-007| glcE 1e-005|	172	2	188
gi|241176301	gi|241176301	Ixodes scapularis	Eukaryota; Metazoa; Arthropoda; Chelicerata; Arachnida; Acari; Parasitiformes; Ixodida; Ixodoidea; Ixodidae; Ixodinae; Ixodes.	M	M	354	chitinase, putative	ExpAA=2.16 First60=2.15 PredHel=0 Topology=o	0					SIG	22-23	39.319	8.98	37.084	9.14	VGD_cys disintegrin |RTS_cys disintegrin |	2	chitinase, putative	0.0	gi|241176301	729	353	354	100	100	Ixodes scapularis	Chitotriosidase-1	1E-066	sp|Q13231|CHIT1_HUMAN	253	319	466	37	69	Homo sapiens	Glyco_hydro_18	4E-070	Glyco_18	5E-087	GH18_chitolecti	1E-125	GH18_chitolectin_chitotriosidase e-125| Glyco_18 6e-085| Glyco_hydro_18 2e-069| GH18_chitinase 6e-055| GH18_IDGF 3e-041| ChiA 1e-039| GH18_chitinase-like 4e-037| GH18_plant_chitinase_class_V 6e-035| GH18_zymocin_alpha 4e-027| GH18_CFLE_spore_hydrolase 6e-015|	173	2	189
gi|241174173	gi|241174173	Ixodes scapularis	Eukaryota; Metazoa; Arthropoda; Chelicerata; Arachnida; Acari; Parasitiformes; Ixodida; Ixodoidea; Ixodidae; Ixodinae; Ixodes.	R	R	695	protein kinase C-binding protein NELL1, putative	ExpAA=0.00 First60=0.00 PredHel=0 Topology=o	0					CYT		77.575	5.53			RGD_cys disintegrin |	1	protein kinase C-binding protein NELL1, putative	0.0	gi|241174173	1550	694	695	100	100	Ixodes scapularis	Protein kinase C-binding protein NELL2	1E-178	sp|A2VCU8|NELL2_XENTR	625	701	814	39	86	Xenopus tropicalis	EGF_3	6E-008	TSPN	1E-022	TSPN	1E-020	TSPN 1e-020| EGF_3 4e-007| LamG 6e-007| VWC 6e-007| LamG 1e-006| EGF_CA 2e-004| Laminin_G_1 3e-004| VWC 5e-004| Laminin_G_2 6e-004| EGF_CA 0.001|	8	8	190
gi|241174084	gi|241174084	Ixodes scapularis	Eukaryota; Metazoa; Arthropoda; Chelicerata; Arachnida; Acari; Parasitiformes; Ixodida; Ixodoidea; Ixodidae; Ixodinae; Ixodes.	R	R	92	hypothetical protein IscW_ISCW002251	ExpAA=0.00 First60=0.00 PredHel=0 Topology=o	0					CYT		10.179	9.43			RTS_cys disintegrin |	1	hypothetical protein IscW_ISCW002251	3E-051	gi|241174084	204	91	92	100	100	Ixodes scapularis	Histone-lysine N-methyltransferase MLL5	2E-004	sp|Q8IZD2|MLL5_HUMAN	44.3	118	1858	34	6	Homo sapiens	Gag_spuma	2.5	MeTrc	0.41	PLN02712	1.7	PLN02712 | TAF8 | PRP8 | PRK14950 | PRK05940 | PRK10431 |	174	2	191
gi|241172929	gi|241172929	Ixodes scapularis	Eukaryota; Metazoa; Arthropoda; Chelicerata; Arachnida; Acari; Parasitiformes; Ixodida; Ixodoidea; Ixodidae; Ixodinae; Ixodes.	M	M	433	neurogenic locus notch, putative	ExpAA=0.07 First60=0.07 PredHel=0 Topology=o	0					SIG	21-22	46.029	5.09	43.888	5.08	ECD_cys disintegrin |	1	neurogenic locus notch, putative	0.0	gi|241172929	919	432	433	100	100	Ixodes scapularis	Protein jagged-2	9E-035	sp|Q9QYE5|JAG2_MOUSE	148	631	1247	39	51	Mus musculus	Herpes_gp2	0.001	EGF_CA	4E-008	EGF_CA	5E-006	EGF_CA 5e-006| EGF_CA 4e-005| Herpes_gp2 0.006| EGF 0.014| PRK11892 0.015| PRK07003 0.030| BASP1 0.045| EGF 0.060| PHA03247 | AF-4 |	175	2	192
gi|241172214	gi|241172214	Ixodes scapularis	Eukaryota; Metazoa; Arthropoda; Chelicerata; Arachnida; Acari; Parasitiformes; Ixodida; Ixodoidea; Ixodidae; Ixodinae; Ixodes.	M	M	227	secreted protein, putative	ExpAA=0.25 First60=0.16 PredHel=0 Topology=o	0					SIG	20-21	23.62	3.77	21.492	3.79	VGD_cys disintegrin |	1	secreted protein, putative	1E-124	gi|241172214	447	226	227	100	100	Ixodes scapularis	Cytochrome c-type biogenesis protein CycK	0.19	sp|P45404|CCMF_RHIME	36.2	65	676	38	10	Rhizobium meliloti	Env-gp36	0.67	BPI1	2.4	PRK14163	1.1	PRK14163 | Env-gp36 | PRK11689 | chap_CCT_eta | VP4 |	18	4	20
gi|241171310	gi|241171310	Ixodes scapularis	Eukaryota; Metazoa; Arthropoda; Chelicerata; Arachnida; Acari; Parasitiformes; Ixodida; Ixodoidea; Ixodidae; Ixodinae; Ixodes.	M	M	211	hypothetical protein IscW_ISCW002683	ExpAA=21.39 First60=21.39 PredHel=1 Topology=i5-27o	1	10.4	87.2	2.4		SIG	24-25	22.688	11.04	20.253	10.89	RTS_cys disintegrin |	1	hypothetical protein IscW_ISCW002683	1E-117	gi|241171310	426	210	211	100	100	Ixodes scapularis	Transcription factor glial cells missing 2	0.011	sp|Q9VLA2|GCM2_DROME	40	44	613	40	7	Drosophila melanogaster	NSP13	0.33	Amelogenin	2.6	NSP13	1.7	NSP13 | PLN03081 | PLN02969 | PseudoU_synth_TruB_4 | FeoB | PRK10819 |	176	2	193
gi|241171283	gi|241171283	Ixodes scapularis	Eukaryota; Metazoa; Arthropoda; Chelicerata; Arachnida; Acari; Parasitiformes; Ixodida; Ixodoidea; Ixodidae; Ixodinae; Ixodes.	Q	Q	213	integrin beta-3, putative	ExpAA=0.00 First60=0.00 PredHel=0 Topology=o	0					CYT		23.278	4.73			RGD_cys disintegrin |ECD_cys disintegrin |	2	integrin beta-3, putative	1E-139	gi|241171283	499	212	213	100	100	Ixodes scapularis	Integrin beta-PS	2E-061	sp|P11584|ITBX_DROME	235	228	846	48	27	Drosophila melanogaster	Integrin_B_tail	0.16	TR_FER	5.9	PRK14877	0.28	PRK14877 | rpoC1 | Integrin_B_tail | OATP |	1	142	194
gi|241171266	gi|241171266	Ixodes scapularis	Eukaryota; Metazoa; Arthropoda; Chelicerata; Arachnida; Acari; Parasitiformes; Ixodida; Ixodoidea; Ixodidae; Ixodinae; Ixodes.	R	R	317	G2/mitotic-specific cyclin A, putative	ExpAA=9.20 First60=0.00 PredHel=0 Topology=o	0					CYT		35.834	6.89			MLD_cys disintegrin |	1	G2/mitotic-specific cyclin A, putative	0.0	gi|241171266	642	316	317	100	100	Ixodes scapularis	G1/S-specific cyclin-E3	3E-064	sp|O42575|CCNE3_XENLA	245	294	408	42	72	Xenopus laevis	Cyclin_N	2E-025	CYCLIN	7E-011	Cyclin_N	9E-025	Cyclin_N 9e-025| COG5024 1e-012| CYCLIN 9e-009| CYCLIN 4e-008| Cyclin_C 1e-005| rplD | PRK12365 | LAG1 | rplD_bact | PLN00110 |	177	2	195
gi|241167429	gi|241167429	Ixodes scapularis	Eukaryota; Metazoa; Arthropoda; Chelicerata; Arachnida; Acari; Parasitiformes; Ixodida; Ixodoidea; Ixodidae; Ixodinae; Ixodes.	S	S	61	hypothetical protein IscW_ISCW002167	ExpAA=1.04 First60=1.04 PredHel=0 Topology=o	0					BL/ANC		6.867	11.54			RGD_cys disintegrin |	1	hypothetical protein IscW_ISCW002167	5E-029	gi|241167429	130	60	61	100	100	Ixodes scapularis	High-affinity choline transporter 1	0.38	sp|Q8UWF0|SC5A7_TORMA	33.5	20	584	76	4	Torpedo marmorata	Peptidase_M3	0.27	AKAP_110	1.7	MotB	0.071	MotB 0.071| Peptidase_M3 | hydrog_prot | H2MP |	178	2	196
gi|241166829	gi|241166829	Ixodes scapularis	Eukaryota; Metazoa; Arthropoda; Chelicerata; Arachnida; Acari; Parasitiformes; Ixodida; Ixodoidea; Ixodidae; Ixodinae; Ixodes.	D	D	321	conserved hypothetical protein	ExpAA=0.00 First60=0.00 PredHel=0 Topology=o	0					CYT		34.798	8.34			RTS_cys disintegrin |	1	conserved hypothetical protein	0.0	gi|241166829	640	320	321	100	100	Ixodes scapularis	Uncharacterized protein KIAA1704 homolog	8E-024	sp|Q5R863|K1704_PONAB	111	334	344	28	97	Pongo abelii	DUF3752	3E-008	BAR	2.4	DUF3752	2E-007	DUF3752 2e-007| PHA03307 | PLN02768 | PRK08691 | Smc | DUF605 | Cor1 | Sporozoite_P67 |	179	2	197
gi|241165998	gi|241165998	Ixodes scapularis	Eukaryota; Metazoa; Arthropoda; Chelicerata; Arachnida; Acari; Parasitiformes; Ixodida; Ixodoidea; Ixodidae; Ixodinae; Ixodes.	M	M	225	hypothetical protein IscW_ISCW001839	ExpAA=25.38 First60=14.32 PredHel=0 Topology=o	0					SIG	25-26	24.196	9.56	21.697	9.48	KTS_cys disintegrin |	1	hypothetical protein IscW_ISCW001839	1E-124	gi|241165998	447	224	225	100	100	Ixodes scapularis	Prostaglandin E2 receptor EP4 subtype	0.53	sp|Q95KZ0|PE2R4_PANTR	34.7	71	490	32	15	Pan troglodytes	DUF3559	0.27	RasGEF	0.79	BAR_OPHN1	1.0	BAR_OPHN1 | PRK07807 | DUF3559 | Peptidase_M57 | PRK09956 | PRK11720 | PLN02414 | PHA02876 | COG1512 | KdsB |	180	2	198
gi|241165278	gi|241165278	Ixodes scapularis	Eukaryota; Metazoa; Arthropoda; Chelicerata; Arachnida; Acari; Parasitiformes; Ixodida; Ixodoidea; Ixodidae; Ixodinae; Ixodes.	L	L	262	serine protease, putative	ExpAA=0.16 First60=0.02 PredHel=0 Topology=o	0					CYT		29.404	8.92			KGD_cys disintegrin |	1	serine protease, putative	1E-157	gi|241165278	558	261	262	100	100	Ixodes scapularis	Transmembrane protease serine 9	1E-049	sp|Q7Z410|TMPS9_HUMAN	196	869	1059	43	82	Homo sapiens	Trypsin	4E-053	Tryp_SPc	8E-073	Tryp_SPc	9E-071	Tryp_SPc 9e-071| Tryp_SPc 5e-069| Trypsin 2e-052| COG5640 3e-017| DUF1986 0.046| COG3591 | PLN02258 | ARV1 | PLN02876 |	7	14	10
gi|241161653	gi|241161653	Ixodes scapularis	Eukaryota; Metazoa; Arthropoda; Chelicerata; Arachnida; Acari; Parasitiformes; Ixodida; Ixodoidea; Ixodidae; Ixodinae; Ixodes.	L	L	267	secreted salivary gland peptide, putative	ExpAA=0.00 First60=0.00 PredHel=0 Topology=o	0					CYT		30.653	8.49			RTS_cys disintegrin |	1	secreted salivary gland peptide, putative	1E-164	gi|241161653	583	266	267	100	100	Ixodes scapularis	Papilin	2E-012	sp|Q868Z9|PPN_DROME	72.8	815	2898	23	28	Drosophila melanogaster	Kunitz_BPTI	0.098	KU	0.002	KU	0.11	KU | KU | Kunitz_BPTI | PLN02703 |	1	142	11
gi|241161091	gi|241161091	Ixodes scapularis	Eukaryota; Metazoa; Arthropoda; Chelicerata; Arachnida; Acari; Parasitiformes; Ixodida; Ixodoidea; Ixodidae; Ixodinae; Ixodes.	M	M	731	glycerol-3-phosphate acyltransferase, putative	ExpAA=9.01 First60=6.99 PredHel=0 Topology=o	0					SIG	17-18	83.02	8.94	81.253	8.9	VGD_cys disintegrin |	1	glycerol-3-phosphate acyltransferase, putative	0.0	gi|241161091	1459	730	731	100	100	Ixodes scapularis	Glycerol-3-phosphate acyltransferase 1, mitochondrial	4E-054	sp|Q9HCL2|GPAT1_HUMAN	213	672	828	37	81	Homo sapiens	Acyltransferase	2E-021	PlsC	3E-021	LPLAT_DHAPAT-li	2E-066	LPLAT_DHAPAT-like 2e-066| plsB 3e-040| PlsB 3e-038| PRK04974 4e-037| PTZ00374 5e-035| PRK03355 1e-026| Acyltransferase 1e-020| PlsC 5e-019| PRK11915 6e-017| LPLAT_AGPAT-like 2e-012|	181	2	199
gi|241159543	gi|241159543	Ixodes scapularis	Eukaryota; Metazoa; Arthropoda; Chelicerata; Arachnida; Acari; Parasitiformes; Ixodida; Ixodoidea; Ixodidae; Ixodinae; Ixodes.	M	M	138	cystatin, putative	ExpAA=17.21 First60=17.03 PredHel=1 Topology=i7-25o	1	13	81.9	5.1		SIG	20-21	15.586	7.65	13.619	7.12	KTS_cys disintegrin |	1	cystatin, putative	1E-075	gi|241159543	285	137	138	100	100	Ixodes scapularis	Cystatin	0.003	sp|Q6T6T4|CYT_BITGA	40.4	98	140	30	71	Bitis gabonica	Cystatin	2E-005	CY	8E-013	CY	5E-011	CY 5e-011| CY 6e-011| Cystatin 1e-004| PRK05330 | GldB_lipo | aceE | WcaA | rpoB | PRK10018 | Coprogen_oxidas |	34	3	38
gi|241158241	gi|241158241	Ixodes scapularis	Eukaryota; Metazoa; Arthropoda; Chelicerata; Arachnida; Acari; Parasitiformes; Ixodida; Ixodoidea; Ixodidae; Ixodinae; Ixodes.	A	A	407	conserved hypothetical protein	ExpAA=0.01 First60=0.00 PredHel=0 Topology=o	0					CYT		45.548	4.75			KTS_cys disintegrin |	1	conserved hypothetical protein	0.0	gi|241158241	831	406	407	100	100	Ixodes scapularis	Drebrin-like protein	1E-072	sp|Q9UJU6|DBNL_HUMAN	273	401	430	38	93	Homo sapiens	SH3_1	4E-010	SH3	2E-018	SH3	2E-016	SH3 2e-016| SH3 8e-014| SH3_1 2e-009| Cofilin_ADF 7e-008| ADF 1e-007| SH3_2 3e-007| ADF 6e-007| PRK05035 0.001| PTZ00121 0.006| PRK07764 0.010|	182	2	200
gi|241157901	gi|241157901	Ixodes scapularis	Eukaryota; Metazoa; Arthropoda; Chelicerata; Arachnida; Acari; Parasitiformes; Ixodida; Ixodoidea; Ixodidae; Ixodinae; Ixodes.	D	D	80	hypothetical protein IscW_ISCW001932	ExpAA=0.00 First60=0.00 PredHel=0 Topology=o	0					BL/SIG		8.394	9.92			KTS_cys disintegrin |	1	hypothetical protein IscW_ISCW001932	1E-039	gi|241157901	166	79	80	100	100	Ixodes scapularis	Protein sister of odd and bowel	1.1	sp|Q9VQS7|SOB_DROME	32	62	578	38	11	Drosophila melanogaster	MSP1_C	1.3	PP2Ac	1.5	primase_Cterm	1.7	primase_Cterm | PRK07562 | PRK06481 | Ble |	183	2	201
gi|241157692	gi|241157692	Ixodes scapularis	Eukaryota; Metazoa; Arthropoda; Chelicerata; Arachnida; Acari; Parasitiformes; Ixodida; Ixodoidea; Ixodidae; Ixodinae; Ixodes.	M	M	283	RPE-spondin, putative	ExpAA=0.03 First60=0.03 PredHel=0 Topology=o	0					SIG	18-19	31.638	7.46	29.562	6.9	ECD_cys disintegrin |	1	RPE-spondin, putative	1E-173	gi|241157692	610	282	283	100	100	Ixodes scapularis	RPE-spondin	2E-028	sp|Q3UPR9|RPESP_MOUSE	126	246	264	28	94	Mus musculus	TSP_1	3E-004	TSP1	3E-007	TSP1	3E-005	TSP1 3e-005| TSP_1 0.001| Somatomedin_B 0.004| PTZ00441 0.013| SO 0.041| eIF-5a | cpeB | COG1151 | PRK10044 | S1_eIF5A |	184	2	202
gi|241154304	gi|241154304	Ixodes scapularis	Eukaryota; Metazoa; Arthropoda; Chelicerata; Arachnida; Acari; Parasitiformes; Ixodida; Ixodoidea; Ixodidae; Ixodinae; Ixodes.	A	A	354	serpin 7 precursor, putative	ExpAA=0.27 First60=0.19 PredHel=0 Topology=o	0					CYT		39.948	6.79			RGD_cys disintegrin |	1	serpin 7 precursor, putative	0.0	gi|241154304	712	353	354	100	100	Ixodes scapularis	Leukocyte elastase inhibitor	5E-052	sp|Q1JPB0|ILEU_BOVIN	205	351	377	34	93	Bos taurus	Serpin	2E-083	SERPIN	2E-071	Serpin	1E-082	Serpin 1e-082| SERPIN 1e-075| SERPIN 2e-069| ovalbumin_like 1e-063| PAI-2 1e-063| ov-serpin 2e-059| alpha-1-antitrypsin_like 2e-051| neuroserpin 3e-049| COG4826 3e-048| maspin_like 8e-046|	185	2	203
gi|241153809	gi|241153809	Ixodes scapularis	Eukaryota; Metazoa; Arthropoda; Chelicerata; Arachnida; Acari; Parasitiformes; Ixodida; Ixodoidea; Ixodidae; Ixodinae; Ixodes.	M	M	181	secreted protein, putative	ExpAA=0.29 First60=0.29 PredHel=0 Topology=o	0					SIG	21-22	19.868	5.21	17.719	5.11	RGD_cys disintegrin |	1	secreted protein, putative	1E-101	gi|241153809	372	180	181	100	100	Ixodes scapularis	Myelin transcription factor 1-like protein	0.001	sp|Q9UL68|MYT1L_HUMAN	43.1	95	1186	35	8	Homo sapiens	DUF1510	0.095	HECTc	0.046	2A1904	0.047	2A1904 0.047| DUF1510 | MPN_eIF3h | COG5177 | PRK10865 | PTZ00121 | PHA03419 | PRK04195 | Utp14 | Daxx |	186	2	204
gi|241153667	gi|241153667	Ixodes scapularis	Eukaryota; Metazoa; Arthropoda; Chelicerata; Arachnida; Acari; Parasitiformes; Ixodida; Ixodoidea; Ixodidae; Ixodinae; Ixodes.	L	L	649	methionyl-tRNA synthetase, putative	ExpAA=0.26 First60=0.10 PredHel=0 Topology=o	0					CYT		74.278	8.69			RGD_cys disintegrin |	1	methionyl-tRNA synthetase, putative	0.0	gi|241153667	1335	648	649	100	100	Ixodes scapularis	Methionyl-tRNA synthetase, cytoplasmic	0.0	sp|Q6PF21|SYMC_XENLA	770	649	905	56	72	Xenopus laevis	tRNA-synt_1g	1E-129	AHS2	0.33	PLN02610	0.0	PLN02610 | PRK12268 e-179| metG e-160| MetG e-149| metG e-145| tRNA-synt_1g e-129| MetRS_core e-108| PRK11893 5e-071| PRK12267 3e-058| Anticodon_Ia_Met 2e-036|	187	2	205
gi|241133862	gi|241133862	Ixodes scapularis	Eukaryota; Metazoa; Arthropoda; Chelicerata; Arachnida; Acari; Parasitiformes; Ixodida; Ixodoidea; Ixodidae; Ixodinae; Ixodes.	Q	Q	1170	tip120, putative	ExpAA=0.21 First60=0.00 PredHel=0 Topology=o	0					CYT		129.732	6.98			KTS_cys disintegrin |	1	tip120, putative	0.0	gi|241133862	2284	1169	1170	100	100	Ixodes scapularis	Cullin-associated NEDD8-dissociated protein 1	0.0	sp|P97536|CAND1_RAT	1156	1181	1230	53	96	Rattus norvegicus	TIP120	1E-063	MIF4G	0.057	TIP120	6E-063	TIP120 6e-063| PRK13800 0.017| SEC21 0.038| TIGR02270 0.039| HSH155 | AlkD_like_1 | Vac14_Fab1_bd | MAR | COG1413 | HpnG |	188	2	206
gi|241123482	gi|241123482	Ixodes scapularis	Eukaryota; Metazoa; Arthropoda; Chelicerata; Arachnida; Acari; Parasitiformes; Ixodida; Ixodoidea; Ixodidae; Ixodinae; Ixodes.	P	P	585	peroxinectin, putative	ExpAA=0.04 First60=0.00 PredHel=0 Topology=o	0					CYT		66.233	8.9			RTS_cys disintegrin |	1	peroxinectin, putative	0.0	gi|241123482	1225	584	585	100	100	Ixodes scapularis	Peroxidase	2E-073	sp|Q01603|PERO_DROME	277	568	690	34	82	Drosophila melanogaster	An_peroxidase	1E-127	Zalpha	4.3	An_peroxidase	1E-126	An_peroxidase e-126| peroxinectin_like e-124| peroxidasin_like 5e-080| peroxinectin_like_bacterial 2e-075| thyroid_peroxidase 1e-069| dual_peroxidase_like 2e-056| An_peroxidase_like 3e-055| myeloperoxidase_like 1e-052| prostaglandin_endoperoxide_synthase 9e-019| An_peroxidase_bacterial_2 3e-014|	21	4	23
gi|241122806	gi|241122806	Ixodes scapularis	Eukaryota; Metazoa; Arthropoda; Chelicerata; Arachnida; Acari; Parasitiformes; Ixodida; Ixodoidea; Ixodidae; Ixodinae; Ixodes.	L	L	242	conserved hypothetical protein	ExpAA=0.22 First60=0.22 PredHel=0 Topology=o	0					CYT		26.455	5.89			KTS_cys disintegrin |	1	conserved hypothetical protein	1E-141	gi|241122806	505	241	242	100	100	Ixodes scapularis	TNF receptor-associated factor 4	5E-010	sp|Q61382|TRAF4_MOUSE	64.7	116	470	33	25	Mus musculus	zf-C3HC4	0.27	RING	0.009	PRK13764	0.26	PRK13764 | COG5222 | cdk7 | RING | zf-C3HC4 | GH18_hevamine_XipI_class_III | PRK05333 | rad18 | Motile_Sperm | DUF2352 |	189	2	207
gi|241122385	gi|241122385	Ixodes scapularis	Eukaryota; Metazoa; Arthropoda; Chelicerata; Arachnida; Acari; Parasitiformes; Ixodida; Ixodoidea; Ixodidae; Ixodinae; Ixodes.	F	F	98	secreted protein, putative	ExpAA=3.26 First60=3.25 PredHel=0 Topology=o	0					CYT		10.964	8.45			RGD_cys disintegrin |	1	secreted protein, putative	5E-053	gi|241122385	210	97	98	100	100	Ixodes scapularis	E3 ubiquitin-protein ligase ICP0	0.001	sp|P29836|ICP0_BHV1K	41.6	58	676	32	9	Bovine herpesvirus 1.2 (strain K22)	Hom_end_hint	3.3	RING	0.28	PRK05713	0.048	PRK05713 0.048| rad18 | PRK08119 | TFB3 | RAD18 | PTKc_Yes | TlpA_like_ScsD_MtbDsbE | EF_0832 | PLN02650 |	190	2	208
gi|241121750	gi|241121750	Ixodes scapularis	Eukaryota; Metazoa; Arthropoda; Chelicerata; Arachnida; Acari; Parasitiformes; Ixodida; Ixodoidea; Ixodidae; Ixodinae; Ixodes.	M	M	128	hypothetical protein IscW_ISCW002892	ExpAA=8.54 First60=0.16 PredHel=0 Topology=o	0					BL	-1	14.093	9.36			KTS_cys disintegrin |	1	hypothetical protein IscW_ISCW002892	3E-069	gi|241121750	264	127	128	100	100	Ixodes scapularis	Malonyl CoA-acyl carrier protein transacylase	0.86	sp|Q89AH0|FABD_BUCBP	32.3	100	311	23	32	Buchnera aphidicola subsp. Baizongia pistaciae (strain Bp)	DUF3379	0.76	Ami_3	2.1	PBP1_iGluR_AMPA	2.7	PBP1_iGluR_AMPA_GluR3 | DUF3379 | PRK09133 | IRK |	191	2	209
gi|241120117	gi|241120117	Ixodes scapularis	Eukaryota; Metazoa; Arthropoda; Chelicerata; Arachnida; Acari; Parasitiformes; Ixodida; Ixodoidea; Ixodidae; Ixodinae; Ixodes.	H	H	93	hypothetical protein IscW_ISCW002465	ExpAA=0.09 First60=0.08 PredHel=0 Topology=o	0					CYT		9.9	6.06			KTS_cys disintegrin |	1	hypothetical protein IscW_ISCW002465	1E-050	gi|241120117	202	92	93	100	100	Ixodes scapularis	Sine oculis-binding protein homolog	0.077	sp|A5X7A0|SOBPA_DANRE	35.8	44	936	44	5	Danio rerio	PV-1	0.074	AgrB	0.16	PRK14959	0.33	PRK14959 | PV-1 | LPLAT_MGAT-like | half-pint | PLN03144 | PRP8 | PHA03247 | CAP_N | Herpes_UL51 | PLN02258 |	192	2	210
gi|241119242	gi|241119242	Ixodes scapularis	Eukaryota; Metazoa; Arthropoda; Chelicerata; Arachnida; Acari; Parasitiformes; Ixodida; Ixodoidea; Ixodidae; Ixodinae; Ixodes.	D	D	679	Semaphorin-2A, putative	ExpAA=0.02 First60=0.00 PredHel=0 Topology=o	0					CYT		76.776	8.95			RED_cys disintegrin |	1	Semaphorin-2A, putative	0.0	gi|241119242	1429	678	679	100	100	Ixodes scapularis	Semaphorin-2A	1E-177	sp|Q9XZC8|SEM2A_SCHGR	621	663	697	48	95	Schistocerca gregaria	Sema	5E-079	Sema	4E-079	Sema	3E-078	Sema 3e-078| Sema 6e-077| Ig_Semaphorin_C 8e-005| PRK12842 | MPN_RPN7_8 | COG4036 | DUF2105 | Ig_Semaphorin_classIII | CBM35_pectate_lyase-like |	193	2	211
gi|241119009	gi|241119009	Ixodes scapularis	Eukaryota; Metazoa; Arthropoda; Chelicerata; Arachnida; Acari; Parasitiformes; Ixodida; Ixodoidea; Ixodidae; Ixodinae; Ixodes.	D	D	961	phosphorylase B kinase alpha, kpb1, putative	ExpAA=0.11 First60=0.00 PredHel=0 Topology=o	0					CYT		109.431	6.48			KGD_cys disintegrin |	1	phosphorylase B kinase alpha, kpb1, putative	0.0	gi|241119009	1924	960	961	100	100	Ixodes scapularis	Probable phosphorylase b kinase regulatory subunit alpha	0.0	sp|Q9W391|KPBA_DROME	964	1067	1247	50	86	Drosophila melanogaster	Glyco_hydro_15	8E-013	PAX	0.57	Glyco_hydro_15	5E-012	Glyco_hydro_15 5e-012| THT_Oxygenase_N | PRK07490 | SPB_interacting | nagA | PHA03325 | Peroxin-3 | PRK15105 | PRK13339 | PRK04200 |	194	2	212
gi|241116702	gi|241116702	Ixodes scapularis	Eukaryota; Metazoa; Arthropoda; Chelicerata; Arachnida; Acari; Parasitiformes; Ixodida; Ixodoidea; Ixodidae; Ixodinae; Ixodes.	M	M	171	hypothetical protein IscW_ISCW017472	ExpAA=9.07 First60=0.02 PredHel=0 Topology=o	0					BL	28-29	19.001	9.1	15.797	9.19	ECD_cys disintegrin |	1	hypothetical protein IscW_ISCW017472	6E-096	gi|241116702	353	170	171	100	100	Ixodes scapularis	Pre-rRNA-processing protein ESF2	2.5	sp|Q1DJR2|ESF2_COCIM	31.6	51	356	37	15	Coccidioides immitis (strain RS)	DUF2921	0.45	AgrB	1.8	PRK07003	0.34	PRK07003 | DUF2921 | Hanta_G1 | ligB | DUF2572 | Maf1 |	1	142	213
gi|241114862	gi|241114862	Ixodes scapularis	Eukaryota; Metazoa; Arthropoda; Chelicerata; Arachnida; Acari; Parasitiformes; Ixodida; Ixodoidea; Ixodidae; Ixodinae; Ixodes.	G	G	412	esterase, putative	ExpAA=0.05 First60=0.01 PredHel=0 Topology=o	0					CYT		45.855	5.13			KGD_cys disintegrin |	1	esterase, putative	0.0	gi|241114862	841	411	412	100	100	Ixodes scapularis	Neuroligin-4, Y-linked	9E-055	sp|Q8NFZ3|NLGNY_HUMAN	214	391	816	32	48	Homo sapiens	COesterase	1E-103	PIPKc	0.012	COesterase	1E-102	COesterase e-102| Esterase_lipase 2e-081| PnbA 2e-054| Aes 2e-008| Abhydrolase_3 0.010| Abhydrolase_5 0.012| DAP2 0.069| PRK05399 | tRNA_bindingDomain | tRNA_bind_EcMetRS_like |	9	7	12
gi|241102064	gi|241102064	Ixodes scapularis	Eukaryota; Metazoa; Arthropoda; Chelicerata; Arachnida; Acari; Parasitiformes; Ixodida; Ixodoidea; Ixodidae; Ixodinae; Ixodes.	L	L	448	hypothetical protein IscW_ISCW024053	ExpAA=0.02 First60=0.00 PredHel=0 Topology=o	0					CYT		48.575	7.21			KTS_cys disintegrin |	1	hypothetical protein IscW_ISCW024053	0.0	gi|241102064	895	447	448	100	100	Ixodes scapularis	TNF receptor-associated factor 6-B	2E-005	sp|Q6DJN2|TRF6B_XENLA	51.2	128	556	26	23	Xenopus laevis	GcrA	0.018	RING	0.016	omega_3_PfaA	0.004	omega_3_PfaA 0.004| PRK12323 0.013| PEX10 0.023| GcrA | rad23 | PRK14951 | PRK14971 | PRK14952 | PRK14959 | PRK07994 |	195	2	214
gi|241095536	gi|241095536	Ixodes scapularis	Eukaryota; Metazoa; Arthropoda; Chelicerata; Arachnida; Acari; Parasitiformes; Ixodida; Ixodoidea; Ixodidae; Ixodinae; Ixodes.	D	D	286	26S proteasome regulatory complex, ATPase RPT2, putative	ExpAA=0.00 First60=0.00 PredHel=0 Topology=o	0					CYT		31.951	8.87			RGD_cys disintegrin |	1	26S proteasome regulatory complex, ATPase RPT2, putative	1E-162	gi|241095536	576	285	286	100	100	Ixodes scapularis	ATPase family AAA domain-containing protein 2	1E-121	sp|Q6PL18|ATAD2_HUMAN	434	279	1390	74	20	Homo sapiens	AAA	1E-040	AAA	2E-017	CDC48	2E-066	CDC48 2e-066| SpoVK 5e-059| RPT1 2e-058| PRK03992 7e-058| 26Sp45 6e-053| PTZ00361 1e-048| pup_AAA 9e-045| FtsH_fam 5e-044| PTZ00454 2e-043| ftsH 4e-043|	196	2	215
gi|241092097	gi|241092097	Ixodes scapularis	Eukaryota; Metazoa; Arthropoda; Chelicerata; Arachnida; Acari; Parasitiformes; Ixodida; Ixodoidea; Ixodidae; Ixodinae; Ixodes.	C	C	2842	hemolectin, putative	ExpAA=0.16 First60=0.00 PredHel=0 Topology=o	0					CYT		313.139	5.41			RGD_cys disintegrin |RTS_cys disintegrin |ECD_cys disintegrin |WGD_cys disintegrin |RED_cys disintegrin |	5	hemolectin, putative	0.0	gi|241092097	6126	2841	2842	100	100	Ixodes scapularis	Hemocytin	1E-118	sp|P98092|HMCT_BOMMO	428	2940	3133	28	94	Bombyx mori	F5_F8_type_C	2E-028	VWD	4E-032	FA58C	2E-036	FA58C 2e-036| VWD 6e-030| F5_F8_type_C 1e-027| FA58C 1e-025| VWD 7e-021| C8 1e-017| C8 2e-016| TIL 6e-007| PRK12323 0.005| PRK00708 0.006|	197	2	216
gi|241075940	gi|241075940	Ixodes scapularis	Eukaryota; Metazoa; Arthropoda; Chelicerata; Arachnida; Acari; Parasitiformes; Ixodida; Ixodoidea; Ixodidae; Ixodinae; Ixodes.	V	V	263	conserved hypothetical protein	ExpAA=0.12 First60=0.00 PredHel=0 Topology=o	0					CYT		29.563	6.84			RED_cys disintegrin |	1	conserved hypothetical protein	1E-153	gi|241075940	543	262	263	100	100	Ixodes scapularis	4-hydroxy-2-oxovalerate aldolase	0.063	sp|Q764S0|HOA_BACPJ	38.1	126	337	24	38	Bacillus sp. (strain JF8)	VirDNA-topo-I_N	1.6	zf-AD	1.7	PRK02079	2.4	PRK02079 | PLN02684 | PLN03165 | PRK05567 | dinG_rel | PGM3 | PHA03101 | eukaryotic_phosphagen_kinases | VirDNA-topo-I_N | Rab20 |	198	2	217
gi|241074613	gi|241074613	Ixodes scapularis	Eukaryota; Metazoa; Arthropoda; Chelicerata; Arachnida; Acari; Parasitiformes; Ixodida; Ixodoidea; Ixodidae; Ixodinae; Ixodes.	L	L	158	conserved hypothetical protein	ExpAA=0.06 First60=0.01 PredHel=0 Topology=o	0					SIG	-1	16.943	7.64			RTS_cys disintegrin |	1	conserved hypothetical protein	1E-085	gi|241074613	318	157	158	100	100	Ixodes scapularis	Uncharacterized protein DDB_G0271670	6E-008	sp|Q75JC9|Y8484_DICDI	56.6	330	374	34	89	Dictyostelium discoideum	YycH	3.2	JHBP	0.10	PRK13383	1.1	PRK13383 | PRK05354 | PLN03046 | PLN02546 | PLN02841 |	199	2	218
gi|241068920	gi|241068920	Ixodes scapularis	Eukaryota; Metazoa; Arthropoda; Chelicerata; Arachnida; Acari; Parasitiformes; Ixodida; Ixodoidea; Ixodidae; Ixodinae; Ixodes.	V	V	567	ecto-NOX disulfide-thiol exchanger, putative	ExpAA=1.07 First60=0.00 PredHel=0 Topology=o	0					CYT		63.945	6.35			RGD_cys disintegrin |	1	ecto-NOX disulfide-thiol exchanger, putative	0.0	gi|241068920	1153	566	567	100	100	Ixodes scapularis	Ecto-NOX disulfide-thiol exchanger 2	1E-140	sp|Q16206|ENOX2_HUMAN	498	556	610	46	91	Homo sapiens	RRM_1	2E-009	RRM_2	1E-012	RRM_2	2E-010	RRM_2 2e-010| RRM 7e-010| RRM_1 9e-009| RRM 5e-008| COG0724 2e-006| Smc 8e-004| SMC_prok_B 0.003| PRK01156 0.011| HOOK 0.025| SF-CC1 0.028|	200	2	219
gi|241060155	gi|241060155	Ixodes scapularis	Eukaryota; Metazoa; Arthropoda; Chelicerata; Arachnida; Acari; Parasitiformes; Ixodida; Ixodoidea; Ixodidae; Ixodinae; Ixodes.	A	A	1360	hypothetical protein IscW_ISCW001035	ExpAA=0.02 First60=0.00 PredHel=0 Topology=o	0					CYT		146.654	6.44			RTS_cys disintegrin |	1	hypothetical protein IscW_ISCW001035	0.0	gi|241060155	2739	1359	1360	100	100	Ixodes scapularis	Dentin sialophosphoprotein	1E-013	sp|Q9NZW4|DSPP_HUMAN	80.1	825	1301	21	63	Homo sapiens	RUN	5E-012	RUN	2E-007	RUN	3E-011	RUN 3e-011| RUN 3e-005| PRK08581 0.093| Cast | PTZ00112 | 2a38euk | Utp14 | PHA03247 | PRK05421 | PRK15347 |	201	2	220
gi|241057106	gi|241057106	Ixodes scapularis	Eukaryota; Metazoa; Arthropoda; Chelicerata; Arachnida; Acari; Parasitiformes; Ixodida; Ixodoidea; Ixodidae; Ixodinae; Ixodes.	M	M	364	netrin, putative	ExpAA=11.31 First60=11.30 PredHel=0 Topology=o	0					SIG	20-21	40.479	6.94	38.512	6.36	RTS_cys disintegrin |	1	netrin, putative	0.0	gi|241057106	773	363	364	100	100	Ixodes scapularis	Netrin-1	1E-121	sp|Q90922|NET1_CHICK	436	377	606	61	62	Gallus gallus	Laminin_N	3E-046	LamNT	1E-086	LamNT	1E-084	LamNT 1e-084| Laminin_N 1e-045| EGF_Lam 2e-007| Laminin_EGF 4e-006| EGF_Lam 6e-005| F5_F8_type_C 0.077| PRK13779 | PRK08170 | PRK11637 | PRK07199 |	202	2	221
gi|241049978	gi|241049978	Ixodes scapularis	Eukaryota; Metazoa; Arthropoda; Chelicerata; Arachnida; Acari; Parasitiformes; Ixodida; Ixodoidea; Ixodidae; Ixodinae; Ixodes.	F	F	236	conserved hypothetical protein	ExpAA=0.02 First60=0.01 PredHel=0 Topology=o	0					CYT		26.84	5.86			RED_cys disintegrin |	1	conserved hypothetical protein	1E-137	gi|241049978	490	235	236	100	100	Ixodes scapularis	Putative deoxyribonuclease TATDN2	8E-059	sp|Q93075|TATD2_HUMAN	226	235	761	45	31	Homo sapiens	TatD_DNase	6E-057	DEP	0.022	TatD_DNase	3E-056	TatD_DNase 3e-056| TatD_DNAse 2e-052| TatD 2e-047| TIGR00010 6e-040| PRK10425 1e-027| PRK10812 2e-024| PRK11449 1e-015| COG1099 3e-012| Amidohydro_2 0.001| COG1831 |	23	4	25
gi|241044066	gi|241044066	Ixodes scapularis	Eukaryota; Metazoa; Arthropoda; Chelicerata; Arachnida; Acari; Parasitiformes; Ixodida; Ixodoidea; Ixodidae; Ixodinae; Ixodes.	I	I	354	phosphoribosylamidoimidazole-succinocarboxamide synthase, putative	ExpAA=0.22 First60=0.02 PredHel=0 Topology=o	0					CYT		39.43	8.06			RTS_cys disintegrin |	1	phosphoribosylamidoimidazole-succinocarboxamide synthase, putative	0.0	gi|241044066	726	353	354	100	100	Ixodes scapularis	Multifunctional protein ADE2	1E-134	sp|P38024|PUR6_CHICK	477	348	426	62	82	Gallus gallus	SAICAR_synt	4E-053	Sema	0.12	SAICAR_synt_Ade	2E-096	SAICAR_synt_Ade5 2e-096| SAICAR_synt 2e-052| purE 1e-048| AIRC 4e-044| SAICAR_synt 1e-040| PRK09362 9e-029| SAICAR_synt_PurC 2e-028| PurC 2e-024| PurE 2e-021| purC 4e-017|	203	2	222
gi|241029455	gi|241029455	Ixodes scapularis	Eukaryota; Metazoa; Arthropoda; Chelicerata; Arachnida; Acari; Parasitiformes; Ixodida; Ixodoidea; Ixodidae; Ixodinae; Ixodes.	M	M	276	secreted protein, putative	ExpAA=5.96 First60=5.96 PredHel=0 Topology=o	0					SIG	24-25	30.199	5.92	27.404	5.79	ECD_cys disintegrin |	1	secreted protein, putative	1E-163	gi|241029455	578	275	276	100	100	Ixodes scapularis	RGM domain family member B	6E-032	sp|Q7TQ33|RGMB_MOUSE	137	291	436	32	67	Mus musculus	RGM_N	1E-019	VWD	3E-005	RGM_N	6E-019	RGM_N 6e-019| RGM_C 3e-009| VWD 0.003| PilW | GOGAT_sm_gam | gltD | FNR1 | dnd_assoc_2 | Sec6 | COG3025 |	204	2	223
gi|241018958	gi|241018958	Ixodes scapularis	Eukaryota; Metazoa; Arthropoda; Chelicerata; Arachnida; Acari; Parasitiformes; Ixodida; Ixodoidea; Ixodidae; Ixodinae; Ixodes.	R	R	240	hypothetical protein IscW_ISCW001587	ExpAA=0.00 First60=0.00 PredHel=0 Topology=o	0					CYT		26.817	11.64			RTS_cys disintegrin |	1	hypothetical protein IscW_ISCW001587	1E-135	gi|241018958	485	239	240	100	100	Ixodes scapularis	Serine/arginine repetitive matrix protein 2	3E-004	sp|Q9UQ35|SRRM2_HUMAN	45.8	2219	2752	25	81	Homo sapiens	DcuA_DcuB	0.67	Alpha_kinase	4.3	PRK13863	0.39	PRK13863 | phageSPP1_gp7 |	205	2	224
gi|241013775	gi|241013775	Ixodes scapularis	Eukaryota; Metazoa; Arthropoda; Chelicerata; Arachnida; Acari; Parasitiformes; Ixodida; Ixodoidea; Ixodidae; Ixodinae; Ixodes.	M	M	71	secreted salivary gland peptide, putative	ExpAA=0.03 First60=0.03 PredHel=0 Topology=o	0					SIG	23-24	7.763	7.52	5.242	8.33	ECD_cys disintegrin |	1	secreted salivary gland peptide, putative	2E-035	gi|241013775	152	70	71	100	100	Ixodes scapularis	Low-density lipoprotein receptor-related protein 8	1.1	sp|Q924X6|LRP8_MOUSE	32	42	996	42	4	Mus musculus	eIF-3_zeta	0.32	SHR3_chaperone	1.9	eIF-3_zeta	1.5	eIF-3_zeta | CReP_N | zntA | PLPDE_III_PvsE_like | FepG |	1	142	22
gi|241009444	gi|241009444	Ixodes scapularis	Eukaryota; Metazoa; Arthropoda; Chelicerata; Arachnida; Acari; Parasitiformes; Ixodida; Ixodoidea; Ixodidae; Ixodinae; Ixodes.	C	C	209	secreted salivary gland peptide, putative	ExpAA=0.01 First60=0.01 PredHel=0 Topology=o	0					CYT		23.681	7.29			KTS_cys disintegrin |	1	secreted salivary gland peptide, putative	1E-118	gi|241009444	427	208	209	100	100	Ixodes scapularis	Phosphoribosylformylglycinamidine synthase 1	5.1	sp|Q7U831|PURQ_SYNPX	31.2	58	217	32	27	Synechococcus sp. (strain WH8102)	DUF530	0.35	PKS_KS	3.5	PRK13253	0.19	PRK13253 | DUF530 | ACP | CitD | PRK10689 | Arabinose_Isome | BAR_SNX9 | yfiA | Antiterm | Peptidase_M19 |	25	3	29
gi|240979942	gi|240979942	Ixodes scapularis	Eukaryota; Metazoa; Arthropoda; Chelicerata; Arachnida; Acari; Parasitiformes; Ixodida; Ixodoidea; Ixodidae; Ixodinae; Ixodes.	M	M	376	conserved hypothetical protein	ExpAA=19.92 First60=18.82 PredHel=1 Topology=o10-28i	1	4.8	2.7	92.6		BL	26-27	43.832	7.29	40.772	7.4	VGD_cys disintegrin |	1	conserved hypothetical protein	0.0	gi|240979942	808	375	376	100	100	Ixodes scapularis	3-ketosteroid-9-alpha-hydroxylase oxygenase subunit	2E-025	sp|P71875|KSHA_MYCTU	117	315	386	27	82	Mycobacterium tuberculosis	Rieske	2E-015	TOP4c	3.2	Rieske_RO_Alpha	2E-023	Rieske_RO_Alpha_KSH 2e-023| Rieske_RO_Alpha_N 3e-022| HcaE 6e-022| Rieske_RO_Alpha_PhDO_like 6e-020| Rieske_RO_Alpha_PrnD 2e-015| Rieske 1e-014| Rieske 2e-014| Rieske_RO_Alpha_VanA_DdmC 5e-013| {NirD} 2e-011| Rieske_RO_Alpha_Tic55 1e-010|	206	2	225
gi|240979810	gi|240979810	Ixodes scapularis	Eukaryota; Metazoa; Arthropoda; Chelicerata; Arachnida; Acari; Parasitiformes; Ixodida; Ixodoidea; Ixodidae; Ixodinae; Ixodes.	A	A	525	WD domain and G-beta repeat containing protein, putative	ExpAA=0.01 First60=0.00 PredHel=0 Topology=o	0					CYT		57.555	9.17			RTS_cys disintegrin |	1	WD domain and G-beta repeat containing protein, putative	0.0	gi|240979810	1045	524	525	100	100	Ixodes scapularis	Autophagy-related protein 16-1	1E-118	sp|Q676U5|A16L1_HUMAN	425	512	607	43	85	Homo sapiens	ATG16	1E-010	WD40	1E-007	WD40	1E-041	WD40 1e-041| COG2319 2e-026| ATG16 6e-010| WD40 2e-005| WD40 3e-005| PLN00181 0.003| IncA 0.015| SMC_prok_A 0.020| PLN02523 | EzrA |	207	2	226
gi|240978969	gi|240978969	Ixodes scapularis	Eukaryota; Metazoa; Arthropoda; Chelicerata; Arachnida; Acari; Parasitiformes; Ixodida; Ixodoidea; Ixodidae; Ixodinae; Ixodes.	L	L	338	conserved hypothetical protein	ExpAA=0.30 First60=0.02 PredHel=0 Topology=o	0					CYT		38.582	8.75			RTS_cys disintegrin |	1	conserved hypothetical protein	0.0	gi|240978969	706	337	338	100	100	Ixodes scapularis	Glycosyltransferase-like domain-containing protein 1-like	5E-085	sp|Q9VXN0|GTDC1_DROME	314	337	377	49	90	Drosophila melanogaster	DUF3524	1E-058	EAL	2.5	DUF3524	5E-058	DUF3524 5e-058| RfaG 8e-006| GT1_YqgM_like 4e-005| GT1_cap1E_like 1e-004| Glycosyltransferase_GTB_type 0.025| GT1_WabH_like 0.032| Glycos_transf_1 0.050| GT1_WavL_like | GT1_amsK_like | Tas |	208	2	227
gi|240978500	gi|240978500	Ixodes scapularis	Eukaryota; Metazoa; Arthropoda; Chelicerata; Arachnida; Acari; Parasitiformes; Ixodida; Ixodoidea; Ixodidae; Ixodinae; Ixodes.	L	L	401	retinoid X receptor, putative	ExpAA=0.00 First60=0.00 PredHel=0 Topology=o	0					CYT		45.382	8.62			RTS_cys disintegrin |	1	retinoid X receptor, putative	0.0	gi|240978500	815	400	401	100	100	Ixodes scapularis	Vitamin D3 receptor	1E-032	sp|Q28037|VDR_BOVIN	141	387	426	27	91	Bos taurus	zf-C4	1E-025	ZnF_C4	4E-025	NR_DBD_VDR_like	7E-034	NR_DBD_VDR_like 7e-034| NR_DBD_CAR 8e-028| NR_DBD_like 9e-026| NR_DBD_VDR 2e-025| zf-C4 6e-025| NR_DBD_Lrh-1_like 1e-023| ZnF_C4 5e-023| NR_DBD_TR 6e-023| NR_DBD_HNF4A 8e-023| NR_DBD_PXR 3e-022|	209	2	228
gi|240975904	gi|240975904	Ixodes scapularis	Eukaryota; Metazoa; Arthropoda; Chelicerata; Arachnida; Acari; Parasitiformes; Ixodida; Ixodoidea; Ixodidae; Ixodinae; Ixodes.	M	M	155	SCF ubiquitin ligase complex, putative	ExpAA=14.30 First60=14.30 PredHel=0 Topology=o	0					SIG	38-39	17.085	4.16	13.25	4.13	RGD_cys disintegrin |	1	SCF ubiquitin ligase complex, putative	3E-085	gi|240975904	317	154	155	100	100	Ixodes scapularis	S-phase kinase-associated protein 1	2E-046	sp|Q71U00|SKP1_XENLA	184	106	163	83	66	Xenopus laevis	Skp1_POZ	6E-021	Skp1	7E-034	Skp1	6E-032	Skp1 6e-032| Skp1_POZ 3e-020| SKP1 2e-017| Skp1 2e-004| BRO1 | DUF3525 | TIGR02918 | Rep_4 | RFC-E_C | more_P_ylases |	210	2	229
gi|240973890	gi|240973890	Ixodes scapularis	Eukaryota; Metazoa; Arthropoda; Chelicerata; Arachnida; Acari; Parasitiformes; Ixodida; Ixodoidea; Ixodidae; Ixodinae; Ixodes.	A	A	1561	disco-interacting protein, putative	ExpAA=7.92 First60=0.07 PredHel=0 Topology=o	0					CYT		169.163	8.48			KTS_cys disintegrin |	1	disco-interacting protein, putative	0.0	gi|240973890	3146	1560	1561	100	100	Ixodes scapularis	Disco-interacting protein 2	0.0	sp|Q9W0S9|DIP2_DROME	1878	1767	1773	58	100	Drosophila melanogaster	AMP-binding	4E-035	GatB_Yqey	4.8	PRK05691	1E-034	PRK05691 1e-034| AMP-binding 2e-034| PRK05850 1e-030| CaiC 7e-030| PRK12476 4e-024| PRK09192 2e-022| DMAP_binding 1e-019| PRK07769 1e-016| PRK07768 9e-014| Acs 6e-013|	211	2	230
gi|240973201	gi|240973201	Ixodes scapularis	Eukaryota; Metazoa; Arthropoda; Chelicerata; Arachnida; Acari; Parasitiformes; Ixodida; Ixodoidea; Ixodidae; Ixodinae; Ixodes.	N	N	323	secreted protein, putative	ExpAA=0.39 First60=0.38 PredHel=0 Topology=o	0					CYT		37.849	8.87			KGD_cys disintegrin |	1	secreted protein, putative	0.0	gi|240973201	665	322	323	100	100	Ixodes scapularis	Carbohydrate sulfotransferase 1	6E-021	sp|O43916|CHST1_HUMAN	101	332	411	27	81	Homo sapiens	Sulfotransfer_1	0.001	SAA	3.2	Sulfotransfer_1	0.005	Sulfotransfer_1 0.005| PRK10586 | hydA | PRK09784 | PRK10468 | PRK10547 | Sulphotransf |	212	2	231
gi|240973192	gi|240973192	Ixodes scapularis	Eukaryota; Metazoa; Arthropoda; Chelicerata; Arachnida; Acari; Parasitiformes; Ixodida; Ixodoidea; Ixodidae; Ixodinae; Ixodes.	S	S	117	secreted protein, putative	ExpAA=1.36 First60=0.01 PredHel=0 Topology=o	0					CYT		13.379	9.35			RTS_cys disintegrin |	1	secreted protein, putative	1E-064	gi|240973192	249	116	117	100	100	Ixodes scapularis	cGMP-specific 3',5'-cyclic phosphodiesterase	0.67	sp|Q8CG03|PDE5A_MOUSE	32.7	96	865	27	11	Mus musculus	MSP	0.80	DNaseIc	2.1	PRK12315	2.2	PRK12315 | STKc_PAK4 | MSP | ATP-synt_ab_C | PLN00143 | PRK06943 | PRK15367 | eIF3_subunit | PLN02656 | bioA |	213	2	232
gi|240959833	gi|240959833	Ixodes scapularis	Eukaryota; Metazoa; Arthropoda; Chelicerata; Arachnida; Acari; Parasitiformes; Ixodida; Ixodoidea; Ixodidae; Ixodinae; Ixodes.	P	P	69	hypothetical protein IscW_ISCW015723	ExpAA=0.00 First60=0.00 PredHel=0 Topology=o	0					CYT		7.61	11.93			RTS_cys disintegrin |	1	hypothetical protein IscW_ISCW015723	8E-037	gi|240959833	156	68	69	100	100	Ixodes scapularis	External core antigen	0.50	sp|P0C625|HBEAG_HBVA3	33.1	60	214	37	29	Hepatitis B virus genotype A2 subtype adw2 (strain Rutter 1979)	MAP2_projctn	4.4	Brix	1.6	PLN02546	3.1	PLN02546 |	214	2	233
gi|240954642	gi|240954642	Ixodes scapularis	Eukaryota; Metazoa; Arthropoda; Chelicerata; Arachnida; Acari; Parasitiformes; Ixodida; Ixodoidea; Ixodidae; Ixodinae; Ixodes.	M	M	328	membrane glycoprotein LIG-1, putative	ExpAA=0.56 First60=0.32 PredHel=0 Topology=o	0					SIG	22-23	36.187	9.54	33.824	9.61	RTS_cys disintegrin |	1	membrane glycoprotein LIG-1, putative	0.0	gi|240954642	661	327	328	100	100	Ixodes scapularis	Insulin-like growth factor-binding protein complex acid labile subunit	3E-011	sp|P35858|ALS_HUMAN	69.7	376	605	37	62	Homo sapiens	LRR_4	0.13	LRR	0.008	COG4886	5E-004	COG4886 5e-004| LRR_RI 0.017| PLN00113 0.082| PRK15387 | LRR_4 | LRR | LRR_TYP | MoeA | Beta_propel | ExeA |	215	2	234
gi|240954138	gi|240954138	Ixodes scapularis	Eukaryota; Metazoa; Arthropoda; Chelicerata; Arachnida; Acari; Parasitiformes; Ixodida; Ixodoidea; Ixodidae; Ixodinae; Ixodes.	M	M	69	secreted protein, putative	ExpAA=3.44 First60=3.44 PredHel=0 Topology=o	0					SIG	22-23	7.844	7.56	5.248	7.84	WGD_cys disintegrin |	1	secreted protein, putative	2E-035	gi|240954138	152	68	69	100	100	Ixodes scapularis	Antimicrobial peptide ISAMP	2E-019	sp|Q8MVA6|ISAMP_IXOSC	94	67	69	61	99	Ixodes scapularis	Arch_flagellin	0.78	Adenylsucc_synt	0.94	CAD1	1.3	CAD1 | PRK09579 | Arch_flagellin | arabinose_DH_like | iditol_2_DH_like | PHA03181 | PHA03140 | FDH_like_1 | AdhP |	1	142	3
gi|240951963	gi|240951963	Ixodes scapularis	Eukaryota; Metazoa; Arthropoda; Chelicerata; Arachnida; Acari; Parasitiformes; Ixodida; Ixodoidea; Ixodidae; Ixodinae; Ixodes.	N	N	184	conserved hypothetical protein	ExpAA=0.06 First60=0.06 PredHel=0 Topology=o	0					CYT		21.192	6.53			ECD_cys disintegrin |	1	conserved hypothetical protein	1E-106	gi|240951963	386	183	184	100	100	Ixodes scapularis	Constitutive coactivator of peroxisome proliferator-activated receptor gamma	3E-019	sp|Q6RI63|F120B_MOUSE	94.7	171	786	38	22	Mus musculus	XPG_I_2	7E-006	XPGI	0.77	XPG_I_2	4E-005	XPG_I_2 4e-005| XPG_I 0.086| fen_arch | PRK03980 | PIN_XPG | PLN02490 | Trehalase | PLN03025 | pdsO | PIN_FEN1 |	216	2	235
gi|326579956	gi|326579956	Ixodes scapularis	Eukaryota; Metazoa; Arthropoda; Chelicerata; Arachnida; Acari; Parasitiformes; Ixodida; Ixodoidea; Ixodidae; Ixodinae; Ixodes.	M	M	302	TRE31	ExpAA=9.62 First60=9.60 PredHel=0 Topology=o	0					SIG	23-24	33.238	9.35	30.851	9.38	KTS_cys disintegrin |	1	TRE31	1E-176	gi|326579956	622	301	302	100	100	Ixodes scapularis	UPF0746 protein DDB_G0281095	1E-014	sp|Q54UG3|Y1095_DICDI	80.9	210	1097	23	19	Dictyostelium discoideum	Borrelia_P83	0.020	VKc	0.17	PTZ00121	7E-005	PTZ00121 7e-005| PRK10263 0.004| Borrelia_P83 | TolA | MIP-T3 | FtsN | sbcc | PRK10927 | tolA | Caldesmon |	221	1	242
gi|332691297	gi|332691297	Ixodes scapularis	Eukaryota; Metazoa; Arthropoda; Chelicerata; Arachnida; Acari; Parasitiformes; Ixodida; Ixodoidea; Ixodidae; Ixodinae; Ixodes.	M	M	222	salivary protein antigen P23	ExpAA=45.17 First60=26.10 PredHel=0 Topology=o	0					SIG	17-18	24.493	9.45	22.783	9.48	KTS_cys disintegrin |	1	salivary protein antigen P23	1E-122	gi|332691297	441	221	222	100	100	Ixodes scapularis	4,4'-diaponeurosporene oxidase	0.23	sp|Q4L978|CRTP_STAHJ	35.8	96	502	28	19	Staphylococcus haemolyticus (strain JCSC1435)	DUF106	1.4	IB	1.6	RHO_alpha_C_ahd	2.1	RHO_alpha_C_ahdA1c-like | Cas1_I-B | cas1_HMARI | cas1 | TCP24 | mgtE | D1pyr5carbox1 | COG3587 | cyto_c552_HCOOH | DUF106 |	25	3	29
gi|312838497	gi|312838497	Ixodes ricinus	Eukaryota; Metazoa; Arthropoda; Chelicerata; Arachnida; Acari; Parasitiformes; Ixodida; Ixodoidea; Ixodidae; Ixodinae; Ixodes.	M	M	619	Ir86-1 protein	ExpAA=7.33 First60=0.09 PredHel=0 Topology=o	0					SIG	18-19	68.02	6.33	66.045	5.99	RGD_cys disintegrin |KGD_cys disintegrin |VGD_cys disintegrin |RED_cys disintegrin |	4	Ir86-1 protein	0.0	gi|312838497	1321	618	619	100	100	Ixodes ricinus	Glycoprotein antigen BM86	2E-079	sp|P20736|BM86_BOOMI	297	577	650	33	89	Boophilus microplus	Neisseria_TspB	0.027	EGF_CA	0.021	PHA03307	0.023	PHA03307 0.023| EGF_CA | Neisseria_TspB | Plasmod_Pvs28 | PRK14718 | COG5275 | PLN03209 | vWA_Matrilin | ALDH_F7_AASADH-like | EGF |	3	38	2
gi|312838463	gi|312838463	Ixodes ricinus	Eukaryota; Metazoa; Arthropoda; Chelicerata; Arachnida; Acari; Parasitiformes; Ixodida; Ixodoidea; Ixodidae; Ixodinae; Ixodes.	P	P	450	Ir86-2 protein	ExpAA=3.89 First60=0.00 PredHel=0 Topology=o	0					CYT		50.097	7.43			KGD_cys disintegrin |KTS_cys disintegrin |	2	Ir86-2 protein	0.0	gi|312838463	957	449	450	100	100	Ixodes ricinus	Glycoprotein antigen BM86	3E-052	sp|P20736|BM86_BOOMI	206	414	650	31	64	Boophilus microplus	Plasmod_Pvs28	0.003	EGF_CA	0.064	Plasmod_Pvs28	0.014	Plasmod_Pvs28 0.014| arch_ComA | EGF_CA | EGF | cEGF | vWA_Matrilin | EGF_CA |	3	38	2
gi|15428306	gi|15428306	Ixodes scapularis	Eukaryota; Metazoa; Arthropoda; Chelicerata; Arachnida; Acari; Parasitiformes; Ixodida; Ixodoidea; Ixodidae; Ixodinae; Ixodes.	M	M	218	26 kDa salivary gland protein B	ExpAA=0.01 First60=0.01 PredHel=0 Topology=o	0					SIG	-1	25.663	8.9			RED_cys disintegrin |	1	26 kDa salivary gland protein B	1E-128	gi|15428306	462	217	218	100	100	Ixodes scapularis	Increased recombination centers protein 19	1.5	sp|Q6FW54|IRC19_CANGA	33.1	89	211	23	43	Candida glabrata (strain ATCC 2001 / CBS 138 / JCM 3761 / NBRC 0622 / NRRL Y-65)	His_binding	0.001	Alpha-L-AF_C	0.23	His_binding	0.007	His_binding 0.007| PHA03166 | GH68 | PLN02419 | ileS | Anticodon_1 | Anticodon_Ia_Ile_BEm | ileS | Vac14_Fig4_bd | Chorismate_bind |	4	24	33
gi|67083749	gi|67083749	Ixodes scapularis	Eukaryota; Metazoa; Arthropoda; Chelicerata; Arachnida; Acari; Parasitiformes; Ixodida; Ixodoidea; Ixodidae; Ixodinae; Ixodes.	M	M	220	putative secreted histamine binding protein	ExpAA=0.01 First60=0.01 PredHel=0 Topology=o	0					SIG	18-19	25.623	9.08	23.658	8.96	RED_cys disintegrin |	1	putative secreted histamine binding protein	1E-128	gi|67083749	461	219	220	100	100	Ixodes scapularis	Low-density lipoprotein receptor-related protein 1	1.1	sp|P98157|LRP1_CHICK	33.5	111	4543	28	2	Gallus gallus	His_binding	8E-004	Alpha_TIF	0.18	His_binding	0.004	His_binding 0.004| DUF3386 | termin_org_DnaJ | GH20_chitobiase-like | PRK11067 | PRK08540 | PHA03380 |	4	24	33
gi|67083715	gi|67083715	Ixodes scapularis	Eukaryota; Metazoa; Arthropoda; Chelicerata; Arachnida; Acari; Parasitiformes; Ixodida; Ixodoidea; Ixodidae; Ixodinae; Ixodes.	M	M	69	putative 5.3 kDa secreted protein-like	ExpAA=14.04 First60=14.04 PredHel=0 Topology=o	0					SIG	22-23	7.886	8.26	5.341	8.33	WGD_cys disintegrin |	1	secreted protein, putative	1E-035	gi|241602783	152	68	107	100	64	Ixodes scapularis	Antimicrobial peptide ISAMP	2E-023	sp|Q8MVA6|ISAMP_IXOSC	107	68	69	71	100	Ixodes scapularis	Metal_hydrol	3.5	Cog4	0.18	ROM1	2.0	ROM1 | Barstar_SaI14_like | PLN02525 | COG3759 | PRK15347 | PRK14809 | psbZ | PLN00411 | FDH_like_1 |	1	142	3
gi|67083707	gi|67083707	Ixodes scapularis	Eukaryota; Metazoa; Arthropoda; Chelicerata; Arachnida; Acari; Parasitiformes; Ixodida; Ixodoidea; Ixodidae; Ixodinae; Ixodes.	M	M	65	putative secreted salivary protein	ExpAA=21.53 First60=21.53 PredHel=1 Topology=o4-26i	1	33.8	6.2	60		SIG	22-23	7.394	9.08	4.815	9.1	WGD_cys disintegrin |	1	putative secreted salivary protein	1E-032	gi|67083707	142	64	65	100	100	Ixodes scapularis	Antimicrobial peptide ISAMP	4E-020	sp|Q8MVA6|ISAMP_IXOSC	96.7	68	69	66	100	Ixodes scapularis	OST3_OST6	2.3	Cog4	0.37	MPP_ASMase	6.3	MPP_ASMase | PRK07331 |	1	142	3
gi|67083661	gi|67083661	Ixodes scapularis	Eukaryota; Metazoa; Arthropoda; Chelicerata; Arachnida; Acari; Parasitiformes; Ixodida; Ixodoidea; Ixodidae; Ixodinae; Ixodes.	M	M	258	Kunitz-like protease inhibitor precursor	ExpAA=2.38 First60=2.38 PredHel=0 Topology=o	0					SIG	19-20	29.111	5.44	27.031	5.32	RGD_cys disintegrin |	1	Kunitz-like protease inhibitor precursor	1E-157	gi|67083661	558	257	258	100	100	Ixodes scapularis	Papilin	8E-015	sp|Q868Z9|PPN_DROME	80.9	807	2898	25	28	Drosophila melanogaster	Kunitz_BPTI	0.001	KU	1E-004	KU	0.006	KU 0.006| Kunitz_BPTI 0.007| KU 0.015| PaRep2b | adenosine_kinase | DUF362 | PRK11679 | PLDc_FAM83A_N | PRK13409 |	1	142	11
gi|67083653	gi|67083653	Ixodes scapularis	Eukaryota; Metazoa; Arthropoda; Chelicerata; Arachnida; Acari; Parasitiformes; Ixodida; Ixodoidea; Ixodidae; Ixodinae; Ixodes.	M	M	220	putative secreted salivary protein	ExpAA=0.01 First60=0.01 PredHel=0 Topology=o	0					SIG	18-19	25.512	8.67	23.549	8.37	RED_cys disintegrin |	1	putative secreted salivary protein	1E-128	gi|67083653	459	219	220	100	100	Ixodes scapularis	Leucine-rich repeat serine/threonine-protein kinase 2	3.3	sp|Q5S007|LRRK2_HUMAN	32	155	2527	23	6	Homo sapiens	His_binding	5E-004	GHB	3.6	His_binding	0.003	His_binding 0.003| ESP1 | DUF2362 | valS | GH68 |	4	24	33
gi|67083633	gi|67083633	Ixodes scapularis	Eukaryota; Metazoa; Arthropoda; Chelicerata; Arachnida; Acari; Parasitiformes; Ixodida; Ixodoidea; Ixodidae; Ixodinae; Ixodes.	M	M	110	ixodegrin-2A RGD containing protein	ExpAA=9.75 First60=9.75 PredHel=0 Topology=o	0					SIG	21-22	11.457	3.68	9.223	3.68	RGD_cys disintegrin |	1	ixodegrin-2A RGD containing protein	4E-060	gi|67083633	234	109	110	100	100	Ixodes scapularis	U9-ctenitoxin-Pr1a	4E-004	sp|P83893|TX16_PHORI	43.5	52	64	37	83	Phoneutria reidyi	GatB_N	0.11	COLIPASE	0.019	GatB	0.19	GatB | GatB_N | COLIPASE | Prokineticin | COLIPASE | gatB | PRK09751 | AMH_N | PRK15454 |	1	142	42
gi|67083581	gi|67083581	Ixodes scapularis	Eukaryota; Metazoa; Arthropoda; Chelicerata; Arachnida; Acari; Parasitiformes; Ixodida; Ixodoidea; Ixodidae; Ixodinae; Ixodes.	M	M	121	putative secreted salivary protein	ExpAA=19.49 First60=19.49 PredHel=1 Topology=o10-32i	1	18.2	8.3	73.6		SIG	23-24	13.542	5.59	11.083	5.23	RGD_cys disintegrin |	1	putative secreted salivary protein	5E-068	gi|67083581	260	120	121	100	100	Ixodes scapularis	Trehalase	7.3	sp|P19813|TREA_RABIT	29.3	48	578	34	8	Oryctolagus cuniculus	NLBH	0.26	MIT	0.046	pip_yhgE_Nterm	0.54	pip_yhgE_Nterm | NLBH | hisG | ScCS-like | ApbE | PRK15384 | NCA2 | PRK08978 |	1	142	4
gi|67083567	gi|67083567	Ixodes scapularis	Eukaryota; Metazoa; Arthropoda; Chelicerata; Arachnida; Acari; Parasitiformes; Ixodida; Ixodoidea; Ixodidae; Ixodinae; Ixodes.	M	M	116	putative salivary protein	ExpAA=0.02 First60=0.02 PredHel=0 Topology=o	0					SIG	19-20	12.809	5.73	10.63	5.86	RTS_cys disintegrin |	1	putative salivary protein	4E-064	gi|67083567	247	115	116	100	100	Ixodes scapularis	Disintegrin and metalloproteinase domain-containing protein 17	1.9	sp|P78536|ADA17_HUMAN	31.2	61	824	27	8	Homo sapiens	Salp15	9E-020	Mad3_BUB1_I	0.37	Salp15	4E-019	Salp15 4e-019| DUF3584 | SKP1 | Adeno_E1B_55K | oxalate_frc | RINT1_TIP1 | PIN_Rrp44 | HMG-CoA_red |	14	4	43
gi|67083555	gi|67083555	Ixodes scapularis	Eukaryota; Metazoa; Arthropoda; Chelicerata; Arachnida; Acari; Parasitiformes; Ixodida; Ixodoidea; Ixodidae; Ixodinae; Ixodes.	M	M	65	putative secreted salivary protein	ExpAA=11.81 First60=11.81 PredHel=0 Topology=o	0					SIG	22-23	7.599	9.16	5.013	9.55	WGD_cys disintegrin |	1	putative secreted salivary protein	4E-034	gi|67083555	147	64	65	100	100	Ixodes scapularis	Antimicrobial peptide ISAMP	7E-009	sp|Q8MVA6|ISAMP_IXOSC	59.3	68	69	47	100	Ixodes scapularis	NinG	9.0	AgrB	2.1	PRK08058	1.9	PRK08058 | PRK12645 |	1	142	3
gi|67083539	gi|67083539	Ixodes scapularis	Eukaryota; Metazoa; Arthropoda; Chelicerata; Arachnida; Acari; Parasitiformes; Ixodida; Ixodoidea; Ixodidae; Ixodinae; Ixodes.	M	M	96	putative secreted salivary protein	ExpAA=7.34 First60=7.34 PredHel=0 Topology=o	0					SIG	17-18	10.598	8.73	8.804	8.61	RTS_cys disintegrin |	1	putative secreted salivary protein	4E-052	gi|67083539	207	95	96	100	100	Ixodes scapularis	Kunitz-type serine protease inhibitor 6 (Fragment)	2E-004	sp|P83606|BMTI6_BOOMI	44.3	270	291	34	93	Boophilus microplus	Kunitz_BPTI	1E-005	KU	5E-006	Kunitz_BPTI	6E-005	Kunitz_BPTI 6e-005| KU 5e-004| KU 0.007| EPS_sugtrans | Mre11_DNA_bind | PGU1 | PRK09108 |	1	142	5
gi|67083495	gi|67083495	Ixodes scapularis	Eukaryota; Metazoa; Arthropoda; Chelicerata; Arachnida; Acari; Parasitiformes; Ixodida; Ixodoidea; Ixodidae; Ixodinae; Ixodes.	M	M	121	putative secreted salivary protein	ExpAA=19.37 First60=19.37 PredHel=1 Topology=o10-32i	1	18.2	8.3	73.6		SIG	24-25	13.422	8.1	10.819	6.31	RGD_cys disintegrin |	1	putative secreted salivary protein	2E-067	gi|67083495	258	120	121	100	100	Ixodes scapularis	Anthranilate phosphoribosyltransferase	0.059	sp|Q1AU89|TRPD_RUBXD	36.2	103	342	30	30	Rubrobacter xylanophilus (strain DSM 9941 / NBRC 16129)	Peroxidase_2	0.42	LPD_N	0.54	Peroxidase_2	1.8	Peroxidase_2 | PRK08219 | pip_yhgE_Nterm | PFL | Glycoprotein_B | PHA03231 | PRK11482 | DUF2463 |	1	142	4
gi|67083427	gi|67083427	Ixodes scapularis	Eukaryota; Metazoa; Arthropoda; Chelicerata; Arachnida; Acari; Parasitiformes; Ixodida; Ixodoidea; Ixodidae; Ixodinae; Ixodes.	M	M	60	putative RGD containing protein	ExpAA=12.27 First60=12.27 PredHel=0 Topology=o	0					SIG	21-22	6.465	4.32	4.444	4.52	RGD_cys disintegrin |	1	putative RGD containing protein	9E-030	gi|67083427	133	59	60	100	100	Ixodes scapularis	Epidermal growth factor-like protein 8	0.13	sp|Q6GUQ1|EGFL8_MOUSE	35	31	293	47	11	Mus musculus	TFIIF_beta	2.5	IL6	3.5	PRK07198	0.87	PRK07198 | PRK03633 | PRK12671 |	1	142	3
gi|67083403	gi|67083403	Ixodes scapularis	Eukaryota; Metazoa; Arthropoda; Chelicerata; Arachnida; Acari; Parasitiformes; Ixodida; Ixodoidea; Ixodidae; Ixodinae; Ixodes.	M	M	60	putative RGD containing protein	ExpAA=20.70 First60=20.70 PredHel=1 Topology=o4-26i	1	36.7	6.7	56.7		SIG	21-22	6.567	4.52	4.466	4.83	RGD_cys disintegrin |	1	putative RGD containing protein	1E-029	gi|67083403	132	59	60	100	100	Ixodes scapularis	Protein eyes shut	0.077	sp|A0A1F4|EYS_DROME	35.8	36	2176	45	2	Drosophila melanogaster	Connexin_CCC	3.8	TFIIE	0.49	PRK07198	0.070	PRK07198 0.070| PRK08238 | PRK09201 | amido_AtzE | UDG_fam4 |	1	142	3
gi|67083399	gi|67083399	Ixodes scapularis	Eukaryota; Metazoa; Arthropoda; Chelicerata; Arachnida; Acari; Parasitiformes; Ixodida; Ixodoidea; Ixodidae; Ixodinae; Ixodes.	M	M	110	putative KGD containing protein	ExpAA=2.97 First60=2.97 PredHel=0 Topology=o	0					SIG	21-22	11.66	4.13	9.349	4.18	KGD_cys disintegrin |	1	putative KGD containing protein	2E-060	gi|67083399	234	109	110	100	100	Ixodes scapularis	Colipase	0.001	sp|P19090|COL_CANFA	42	85	112	29	77	Canis familiaris	ACC_central	0.49	COLIPASE	0.038	enolase	0.97	enolase | Nterm_to_SelD | ACC_central | PRK08936 | Enolase_C | COLIPASE | PRK13561 | Plasmepsin_5 |	1	142	42
gi|67083395	gi|67083395	Ixodes scapularis	Eukaryota; Metazoa; Arthropoda; Chelicerata; Arachnida; Acari; Parasitiformes; Ixodida; Ixodoidea; Ixodidae; Ixodinae; Ixodes.	M	M	65	putative secreted salivary protein	ExpAA=21.78 First60=21.78 PredHel=1 Topology=o4-26i	1	33.8	6.2	60		SIG	22-23	7.466	8.86	4.902	8.89	WGD_cys disintegrin |	1	putative secreted salivary protein	7E-033	gi|67083395	143	64	65	100	100	Ixodes scapularis	Antimicrobial peptide ISAMP	1E-020	sp|Q8MVA6|ISAMP_IXOSC	98.6	68	69	66	100	Ixodes scapularis	NnrU	1.3	Cog4	0.39	PLN02374	4.3	PLN02374 | NnrU | ESSS |	1	142	3
gi|67083317	gi|67083317	Ixodes scapularis	Eukaryota; Metazoa; Arthropoda; Chelicerata; Arachnida; Acari; Parasitiformes; Ixodida; Ixodoidea; Ixodidae; Ixodinae; Ixodes.	M	M	174	putative secreted cysteine rich protein	ExpAA=0.49 First60=0.49 PredHel=0 Topology=o	0					SIG	21-22	18.294	5	16.098	4.88	VGD_cys disintegrin |	1	putative secreted cysteine rich protein	1E-100	gi|67083317	369	173	174	100	100	Ixodes scapularis	Probable methyltransferase PMT28	0.003	sp|Q9LN50|PMTS_ARATH	41.6	82	724	34	11	Arabidopsis thaliana	Salp15	2E-018	CULLIN	0.61	Salp15	9E-018	Salp15 9e-018| COG5484 0.071| PTZ00303 | Na_symport_lg | PRK10590 | III | OmpC | TIGR00357 | CobT | Trep_dent_lipo |	4	24	6
gi|67083309	gi|67083309	Ixodes scapularis	Eukaryota; Metazoa; Arthropoda; Chelicerata; Arachnida; Acari; Parasitiformes; Ixodida; Ixodoidea; Ixodidae; Ixodinae; Ixodes.	M	M	134	putative secreted protein	ExpAA=8.00 First60=8.00 PredHel=0 Topology=o	0					SIG	22-23	14.929	5.45	12.479	5.19	VGD_cys disintegrin |	1	putative secreted protein	1E-077	gi|67083309	292	133	134	100	100	Ixodes scapularis	Holliday junction ATP-dependent DNA helicase ruvA	2.5	sp|Q31H84|RUVA_THICR	30.8	67	200	27	34	Thiomicrospira crunogena (strain XCL-2)	Med1	1.6	14_3_3	0.57	PTZ00019	2.0	PTZ00019 | COG4230 | Peptidase_M14-like_1_7 | PTZ00237 | PRK09921 | FBP_aldolase_I_a | PRK10116 | Med1 | PRK08579 | Spore_III_AE |	1	142	4
gi|67083188	gi|67083188	Ixodes scapularis	Eukaryota; Metazoa; Arthropoda; Chelicerata; Arachnida; Acari; Parasitiformes; Ixodida; Ixodoidea; Ixodidae; Ixodinae; Ixodes.	M	M	118	putative secreted salivary protein	ExpAA=5.07 First60=5.07 PredHel=0 Topology=o	0					SIG	17-18	13.059	8.63	11.304	8.71	VGD_cys disintegrin |	1	putative secreted salivary protein	1E-065	gi|67083188	252	117	118	100	100	Ixodes scapularis	PTB domain-containing engulfment adapter protein 1	0.51	sp|Q5PQS4|GULP1_RAT	33.1	59	304	31	20	Rattus norvegicus	Salp15	7E-023	SERPIN	1.4	Salp15	3E-022	Salp15 3e-022| ND6 | MethyltransfD12 | Peptidase_C10 | M20_ArgE_DapE_like3 | MviN | PBP_1a_fam | PRK00068 | DUF1146 | DUF1433 |	14	4	44
gi|67083172	gi|67083172	Ixodes scapularis	Eukaryota; Metazoa; Arthropoda; Chelicerata; Arachnida; Acari; Parasitiformes; Ixodida; Ixodoidea; Ixodidae; Ixodinae; Ixodes.	M	M	126	putative secreted protein	ExpAA=0.02 First60=0.02 PredHel=0 Topology=o	0					SIG	19-20	13.895	8.04	11.854	8.16	VGD_cys disintegrin |	1	putative secreted protein	4E-071	gi|67083172	270	125	126	100	100	Ixodes scapularis	Enolase 3	0.51	sp|Q2FTN3|ENO3_METHJ	33.1	40	402	41	10	Methanospirillum hungatei (strain JF-1 / DSM 864)	Salp15	0.19	ACR	1.1	PRK10537	0.10	PRK10537 | panB | KPHMT-like | Salp15 | Pantoate_transf | YCG1 | COG2034 | TIGR02680 | PTZ00055 | PLN02610 |	230	1	256
gi|67083162	gi|67083162	Ixodes scapularis	Eukaryota; Metazoa; Arthropoda; Chelicerata; Arachnida; Acari; Parasitiformes; Ixodida; Ixodoidea; Ixodidae; Ixodinae; Ixodes.	M	M	92	putative secreted salivary protein	ExpAA=3.83 First60=3.83 PredHel=0 Topology=o	0					SIG	19-20	10.104	5.57	8.231	5.2	RED_cys disintegrin |	1	putative secreted salivary protein	8E-050	gi|67083162	199	91	92	100	100	Ixodes scapularis	Early lactation protein	0.003	sp|Q29143|ELAC_TRIVU	40.4	92	102	27	91	Trichosurus vulpecula	Kunitz_BPTI	0.005	KU	6E-006	KU	7E-004	KU 7e-004| KU 0.003| Kunitz_BPTI 0.025| PKc_MAPKK_Byr1_like | ung | PaaK | PRK07952 | sdhA |	1	142	5
gi|67083158	gi|67083158	Ixodes scapularis	Eukaryota; Metazoa; Arthropoda; Chelicerata; Arachnida; Acari; Parasitiformes; Ixodida; Ixodoidea; Ixodidae; Ixodinae; Ixodes.	M	M	121	putative secreted WC salivary protein	ExpAA=20.85 First60=20.85 PredHel=1 Topology=o10-32i	1	18.2	8.3	73.6		SIG	24-25	13.397	6.27	10.811	5.22	RGD_cys disintegrin |	1	putative secreted WC salivary protein	1E-067	gi|67083158	259	120	121	100	100	Ixodes scapularis	Leucine-rich repeat-containing protein 8B	1.9	sp|Q6P9F7|LRC8B_HUMAN	31.2	67	803	31	8	Homo sapiens	Pox_RNA_pol	0.063	LPD_N	0.18	Pox_RNA_pol	0.27	Pox_RNA_pol | asp_kin_monofn | ELP3 | RhoGAP_p190 | pip_yhgE_Nterm | PRK09699 | ALDH_y4uC | ACR_tran | PRK08818 | PRK08210 |	1	142	4
gi|67083144	gi|67083144	Ixodes scapularis	Eukaryota; Metazoa; Arthropoda; Chelicerata; Arachnida; Acari; Parasitiformes; Ixodida; Ixodoidea; Ixodidae; Ixodinae; Ixodes.	M	M	60	putative salivary secreted protein	ExpAA=1.49 First60=1.49 PredHel=0 Topology=o	0					SIG	21-22	6.525	4.66	4.437	5	RGD_cys disintegrin |	1	putative salivary secreted protein	1E-029	gi|67083144	132	59	60	100	100	Ixodes scapularis	Toxin S5C1	4.2	sp|P01413|TX51_DENJA	30	14	61	66	25	Dendroaspis jamesoni kaimosae	Aldo_ket_red	2.3	PIPKc	3.4				1	142	3
gi|67083138	gi|67083138	Ixodes scapularis	Eukaryota; Metazoa; Arthropoda; Chelicerata; Arachnida; Acari; Parasitiformes; Ixodida; Ixodoidea; Ixodidae; Ixodinae; Ixodes.	M	M	61	putative secreted protein with RGD domain	ExpAA=3.80 First60=3.80 PredHel=0 Topology=o	0					SIG	21-22	6.627	4.44	4.472	4.63	RGD_cys disintegrin |	1	putative secreted protein with RGD domain	1E-030	gi|67083138	136	60	61	100	100	Ixodes scapularis	Protein eyes shut homolog	1.9	sp|Q5T1H1|EYS_HUMAN	31.2	38	3165	35	1	Homo sapiens	DUF917	0.50	IL6	0.68	DUF917	2.4	DUF917 | PRK12671 |	1	142	3
gi|51011578	gi|51011578	Ixodes pacificus	Eukaryota; Metazoa; Arthropoda; Chelicerata; Arachnida; Acari; Parasitiformes; Ixodida; Ixodoidea; Ixodidae; Ixodinae; Ixodes.	S	S	147	ARMET-like protein precursor	ExpAA=0.00 First60=0.00 PredHel=0 Topology=o	0					CYT		16.76	6.81			KTS_cys disintegrin |	1	ARMET-like protein precursor	4E-080	gi|51011578	300	146	147	100	100	Ixodes pacificus	Mesencephalic astrocyte-derived neurotrophic factor homolog	3E-048	sp|B4K5R6|ARMET_DROMO	190	138	173	63	80	Drosophila mojavensis	Armet	2E-045	SAP	0.27	Armet	1E-044	Armet 1e-044| COG2071 | Med30 | DUF1015 | GATase1_2 | PRK12808 | Peptidase_C26 |	31	3	34
gi|51011476	gi|51011476	Ixodes pacificus	Eukaryota; Metazoa; Arthropoda; Chelicerata; Arachnida; Acari; Parasitiformes; Ixodida; Ixodoidea; Ixodidae; Ixodinae; Ixodes.	M	M	60	putative salivary secreted peptide	ExpAA=13.34 First60=13.34 PredHel=0 Topology=o	0					SIG	21-22	6.546	4.93	4.423	6.2	RGD_cys disintegrin |	1	putative salivary secreted peptide	2E-030	gi|51011476	135	59	60	100	100	Ixodes pacificus	Protein eyes shut	0.65	sp|A0A1F4|EYS_DROME	32.7	37	2176	42	2	Drosophila melanogaster	DUF3138	2.2	PKS_AT	0.47	PRK05331	0.31	PRK05331 | ccmB | COG4882 | PRK03633 | PRK07198 | caca | PLN02255 |	1	142	3
gi|51011390	gi|51011390	Ixodes pacificus	Eukaryota; Metazoa; Arthropoda; Chelicerata; Arachnida; Acari; Parasitiformes; Ixodida; Ixodoidea; Ixodidae; Ixodinae; Ixodes.	M	M	124	putative peptide 11.3 kDa	ExpAA=0.05 First60=0.05 PredHel=0 Topology=o	0					SIG	20-21	13.846	5.19	11.571	4.66	VGD_cys disintegrin |	1	putative peptide 11.3 kDa	4E-071	gi|51011390	270	123	124	100	100	Ixodes pacificus	Zinc metalloprotease mde10	0.29	sp|O13766|MDE10_SCHPO	33.9	71	512	26	14	Schizosaccharomyces pombe (strain ATCC 38366 / 972)	Salp15	2E-018	FAS1	0.42	Salp15	8E-018	Salp15 8e-018| PRK06132 | PLN02546 | hsdR | Malic_M | NAD_bind_1_malic_enz | RbsD_FucU |	14	4	43
gi|51011382	gi|51011382	Ixodes pacificus	Eukaryota; Metazoa; Arthropoda; Chelicerata; Arachnida; Acari; Parasitiformes; Ixodida; Ixodoidea; Ixodidae; Ixodinae; Ixodes.	Y	Y	205	KUN-2	ExpAA=0.00 First60=0.00 PredHel=0 Topology=i	0					CYT		23.848	8.22			KTS_cys disintegrin |	1	KUN-2	1E-129	gi|51011382	465	204	205	100	100	Ixodes pacificus	Papilin	2E-013	sp|Q868Z9|PPN_DROME	75.9	704	2898	27	24	Drosophila melanogaster	MAAL_C	0.27	KU	0.037	KU	1.1	KU | MAAL_C | Kunitz_BPTI | KU | MAL |	1	142	11
gi|241694585	gi|241694585	Ixodes scapularis	Eukaryota; Metazoa; Arthropoda; Chelicerata; Arachnida; Acari; Parasitiformes; Ixodida; Ixodoidea; Ixodidae; Ixodinae; Ixodes.	M	M	298	sidestep protein, putative	ExpAA=18.36 First60=18.32 PredHel=1 Topology=i20-39o	1	6.4	86.9	6.7		SIG	39-40	32.387	10.23	28.483	10.02	RGD_cys disintegrin |	1	sidestep protein, putative	1E-170	gi|241694585	602	297	298	100	100	Ixodes scapularis	Kin of IRRE-like protein 2	7E-005	sp|Q7TSU7|KIRR2_MOUSE	48.1	76	700	33	11	Mus musculus	C2-set_2	3E-007	IG_like	2E-004	Ig2_KIRREL3-lik	2E-007	Ig2_KIRREL3-like 2e-007| C2-set_2 2e-006| Ig2_Necl-1-4_like 6e-006| Ig 0.003| Ig2_Nectin-2_like 0.003| Ig2_Necl-4 0.006| Ig2_Necl-2 0.013| Ig2_Necl-1 0.014| IgC 0.021| IG_like 0.023|	238	1	265
gi|219935293	gi|219935293	Ixodes ricinus	Eukaryota; Metazoa; Arthropoda; Chelicerata; Arachnida; Acari; Parasitiformes; Ixodida; Ixodoidea; Ixodidae; Ixodinae; Ixodes.	M	M	329	lipocalin	ExpAA=0.01 First60=0.01 PredHel=0 Topology=o	0					SIG	18-19	38.35	5.9	36.448	5.71	RED_cys disintegrin |	1	lipocalin	0.0	gi|219935293	696	328	329	100	100	Ixodes ricinus	Female-specific histamine-binding protein 2	2E-004	sp|O77421|HBP2_RHIAP	46.6	114	190	26	61	Rhipicephalus appendiculatus	His_binding	4E-028	LIGANc	3.9	His_binding	2E-027	His_binding 2e-027| F-BAR_Syp1p_like | Peptidase_M2 | PLN03183 | PRK05481 | engB | Radial_spoke |	239	1	266
gi|115394523	gi|115394523	Ixodes ricinus	Eukaryota; Metazoa; Arthropoda; Chelicerata; Arachnida; Acari; Parasitiformes; Ixodida; Ixodoidea; Ixodidae; Ixodinae; Ixodes.	M	M	131	putative secreted salivary protein Salp15IR-3 precursor	ExpAA=0.01 First60=0.01 PredHel=0 Topology=o	0					SIG	19-20	14.322	7.51	12.345	7.74	VGD_cys disintegrin |	1	putative secreted salivary protein Salp15IR-3 precursor	4E-073	gi|115394523	277	130	131	100	100	Ixodes ricinus	Protein IFH1	3.2	sp|P39520|IFH1_YEAST	30.4	62	1085	29	6	Saccharomyces cerevisiae (strain ATCC 204508 / S288c)	Salp15	1E-022	LPD_N	0.013	Salp15	4E-022	Salp15 4e-022| COG3428 | pk1 | DUF827 | PRK08411 | PRK02101 | TIGR03943 | SERPIN | ampC | Tcp11 |	14	4	44
gi|67083629	gi|67083629	Ixodes scapularis	Eukaryota; Metazoa; Arthropoda; Chelicerata; Arachnida; Acari; Parasitiformes; Ixodida; Ixodoidea; Ixodidae; Ixodinae; Ixodes.	M	M	176	putative secreted protein	ExpAA=0.33 First60=0.33 PredHel=0 Topology=o	0					SIG	18-19	19.56	9	17.542	9.16	KTS_cys disintegrin |	1	putative secreted protein	1E-105	gi|67083629	385	175	176	100	100	Ixodes scapularis	Papilin	2E-015	sp|Q868Z9|PPN_DROME	81.6	759	2898	31	26	Drosophila melanogaster	Kunitz_BPTI	2E-008	KU	2E-010	KU	2E-008	KU 2e-008| Kunitz_BPTI 1e-007| KU 6e-007| PHA03247 2e-004| PRK11907 0.010| kgd 0.012| PRK10905 0.022| rad23 0.032| Rubella_E2 0.033| PRK12438 |	1	142	7
gi|67083543	gi|67083543	Ixodes scapularis	Eukaryota; Metazoa; Arthropoda; Chelicerata; Arachnida; Acari; Parasitiformes; Ixodida; Ixodoidea; Ixodidae; Ixodinae; Ixodes.	M	M	66	putative secreted salivary protein	ExpAA=4.60 First60=4.60 PredHel=0 Topology=o	0					SIG	22-23	7.399	8.83	4.946	8.93	RTS_cys disintegrin |	1	putative secreted salivary protein	4E-034	gi|67083543	147	65	66	100	100	Ixodes scapularis	Delta-ctenitoxin-Pn2a	0.046	sp|P29425|TX26_PHONI	36.6	70	82	33	87	Phoneutria nigriventer	CreD	2.5	AKAP_110	1.5	PRK11715	1.5	PRK11715 | A-tRNA_syn_arch | alaS | PRK14297 | PTKc_Tyro3 | COG1107 |	1	142	3
gi|67083519	gi|67083519	Ixodes scapularis	Eukaryota; Metazoa; Arthropoda; Chelicerata; Arachnida; Acari; Parasitiformes; Ixodida; Ixodoidea; Ixodidae; Ixodinae; Ixodes.	M	M	105	salivary trypsin inhibitor-like	ExpAA=0.04 First60=0.04 PredHel=0 Topology=o	0					SIG	19-20	11.697	4.31	9.602	4.25	RED_cys disintegrin |	1	salivary trypsin inhibitor-like	3E-062	gi|67083519	241	104	105	100	100	Ixodes scapularis	Cysteine-rich venom protein 6	6E-004	sp|Q8T0W0|CVP6_PIMHY	42.7	76	77	28	100	Pimpla hypochondriaca	DUF2909	0.005	AgrB	0.16	DUF2909	0.022	DUF2909 0.022| PLN02272 | Ygr210 | Phage_RpbA | Salp15 | PRK09602 | Foamy_virus_ENV | PLN02856 |	1	142	5
gi|67083409	gi|67083409	Ixodes scapularis	Eukaryota; Metazoa; Arthropoda; Chelicerata; Arachnida; Acari; Parasitiformes; Ixodida; Ixodoidea; Ixodidae; Ixodinae; Ixodes.	M	M	69	putative 5.3 kDa secreted protein-like	ExpAA=16.96 First60=16.96 PredHel=0 Topology=o	0					SIG	24-25	7.601	8.86	4.849	9.1	WGD_cys disintegrin |	1	putative 5.3 kDa secreted protein-like	3E-035	gi|67083409	151	68	69	100	100	Ixodes scapularis	Antimicrobial peptide ISAMP	3E-021	sp|Q8MVA6|ISAMP_IXOSC	100	68	69	65	100	Ixodes scapularis	DUF1423	0.027	Cog4	0.22	DUF1423	0.12	DUF1423 | TlyC | DUF21 | NQR2_RnfD_RnfE | peroxidase | DUF989 | NnrU |	1	142	3
gi|67083208	gi|67083208	Ixodes scapularis	Eukaryota; Metazoa; Arthropoda; Chelicerata; Arachnida; Acari; Parasitiformes; Ixodida; Ixodoidea; Ixodidae; Ixodinae; Ixodes.	M	M	178	secreted cysteine rich salivary protein	ExpAA=0.46 First60=0.46 PredHel=0 Topology=o	0					SIG	18-19	20.392	8.83	18.439	8.82	KTS_cys disintegrin |	1	secreted cysteine rich salivary protein	1E-108	gi|67083208	393	177	178	100	100	Ixodes scapularis	Papilin	2E-014	sp|Q868Z9|PPN_DROME	78.6	762	2898	30	26	Drosophila melanogaster	Kunitz_BPTI	5E-007	KU	8E-010	KU	8E-008	KU 8e-008| Kunitz_BPTI 2e-006| KU 1e-005| PHA03247 3e-004| PRK11907 0.004| kgd 0.008| PRK05641 0.013| PRK10905 0.018| rad23 0.022| PRK12438 0.026|	1	142	7
Soft ticks - Argasidae includes Kunitz, TIL, lipocalin and basic tail familes
gi|157833898	gi|157833898	Ornithodoros moubata	Eukaryota; Metazoa; Arthropoda; Chelicerata; Arachnida; Acari; Parasitiformes; Ixodida; Ixodoidea; Argasidae; Ornithodorinae; Ornithodoros.	X	X	60	Chain A, Nmr Solution Structure Of Recombinant Tick Anticoagulant Protein (Rtap), A Factor Xa Inhibitor From The Tick Ornithodoros Moubata	ExpAA=0.00 First60=0.00 PredHel=0 Topology=i	0					CYT		6.81	4.65			ECD_cys disintegrin |	1	anticoagulant peptide	5E-032	gi|209479	140	58	61	100	97	synthetic construct	Tick anticoagulant peptide	2E-033	sp|P17726|TAP_ORNMO	140	58	60	100	98	Ornithodoros moubata	Kunitz_BPTI	0.12	STYKc	1.4	Kunitz_BPTI	0.53	Kunitz_BPTI | PepN | Glyco_hydro_100 |	1	142	15
gi|308386965	gi|308386965	Ornithodoros moubata	Eukaryota; Metazoa; Arthropoda; Chelicerata; Arachnida; Acari; Parasitiformes; Ixodida; Ixodoidea; Argasidae; Ornithodorinae; Ornithodoros.	M	M	168	unnamed protein product	ExpAA=0.01 First60=0.01 PredHel=0 Topology=o	0					SIG	18-19	18.759	4.55	16.804	4.55	MLD_cys disintegrin |	1	complement inhibitor precursor	4E-095	gi|49409517	350	167	168	100	100	Ornithodoros moubata	Moubatin	2E-041	sp|Q04669|MOUB_ORNMO	168	164	171	49	96	Ornithodoros moubata	HOOK	1.2	CBD_II	0.14	PRK10331	1.8	PRK10331 | PRK14973 | PleD | PRK01637 | HOOK | pabC_Proteo |	4	24	6
gi|58371884	gi|58371884	Argas reflexus	Eukaryota; Metazoa; Arthropoda; Chelicerata; Arachnida; Acari; Parasitiformes; Ixodida; Ixodoidea; Argasidae; Argasinae; Argas.	M	M	159	Arg r 1 precursor	ExpAA=0.01 First60=0.01 PredHel=0 Topology=o	0					SIG	16-17	17.007	8.6	15.384	8.66	KTS_cys disintegrin |	1	Allergen Arg r 1; AltName: Allergen=Arg r 1; Flags: Precursor	3E-091	gi|74837083	337	158	159	100	100	Argas reflexus	Allergen Arg r 1	1E-092	sp|Q5GQ85|ARGR1_ARGRF	337	158	159	100	100	Argas reflexus	His_binding	1E-009	BBOX	0.86	His_binding	7E-009	His_binding 7e-009| Band_7_5 | spore_YpeB | PRK07308 | ura-cupin |	4	24	6
gi|544163	gi|544163	Ornithodoros moubata	Eukaryota; Metazoa; Arthropoda; Chelicerata; Arachnida; Acari; Parasitiformes; Ixodida; Ixodoidea; Argasidae; Ornithodorinae; Ornithodoros.	S	S	60	Disagregin; AltName: Full=Platelet aggregation activation inhibitor	ExpAA=0.00 First60=0.00 PredHel=0 Topology=i	0					CYT		6.962	6.66			RED_cys disintegrin |	1	Disagregin; AltName: Full=Platelet aggregation activation inhibitor	5E-033	gi|544163	144	59	60	100	100	Ornithodoros moubata=tick, salivary gland, Peptide, 60 aa	Disagregin	2E-034	sp|P36235|DISG_ORNMO	144	59	60	100	100	Ornithodoros moubata	Kunitz_BPTI	3.6	KU	0.40	M14_CP_N-E_like	0.42	M14_CP_N-E_like | IMPase_like | PRK05070 | M14_CPM | casA_cse1 |	1	142	5
gi|545738	gi|545738	Ornithodoros moubata	Eukaryota; Metazoa; Arthropoda; Chelicerata; Arachnida; Acari; Parasitiformes; Ixodida; Ixodoidea; Argasidae; Ornithodorinae; Ornithodoros.	S	S	60	disagregin=fibrinogen receptor antagonist	ExpAA=0.00 First60=0.00 PredHel=0 Topology=i	0					CYT		6.966	6.66			RED_cys disintegrin |	1	Disagregin; AltName: Full=Platelet aggregation activation inhibitor	5E-033	gi|544163	144	59	60	100	100	Ornithodoros moubata=tick, salivary gland, Peptide, 60 aa	Disagregin	2E-034	sp|P36235|DISG_ORNMO	144	59	60	100	100	Ornithodoros moubata	Kunitz_BPTI	3.6	KU	0.40	M14_CP_N-E_like	0.42	M14_CP_N-E_like | IMPase_like | PRK05070 | M14_CPM | casA_cse1 |	1	142	5
gi|146386433	gi|146386433	Ornithodoros moubata	Eukaryota; Metazoa; Arthropoda; Chelicerata; Arachnida; Acari; Parasitiformes; Ixodida; Ixodoidea; Argasidae; Ornithodorinae; Ornithodoros.	D	D	150	Chain A, The Complement Inhibitor Omci In Complex With Ricinoleic Acid	ExpAA=0.00 First60=0.00 PredHel=0 Topology=o	0					CYT		16.83	4.55			MLD_cys disintegrin |	1	Chain A, The Complement Inhibitor Omci In Complex With Ricinoleic Acid	3E-085	gi|146386433	317	149	150	100	100		Moubatin	1E-034	sp|Q04669|MOUB_ORNMO	145	147	171	44	87	Ornithodoros moubata	AsmA	0.92	VPS10	0.62	PRK01637	1.2	PRK01637 | PRK10331 | PRK14973 | AsmA | CHRD | acid_CoA_mut_N | HOOK | PBP1_allose_binding |	4	24	6
gi|21435983	gi|21435983	Ornithodoros savignyi	Eukaryota; Metazoa; Arthropoda; Chelicerata; Arachnida; Acari; Parasitiformes; Ixodida; Ixodoidea; Argasidae; Ornithodorinae; Ornithodoros.	M	M	82	savignygrin	ExpAA=17.94 First60=17.94 PredHel=1 Topology=i5-22o	1	20.7	73.2	6.1		SIG	18-19	9.074	4.89	7.116	4.89	RGD_cys disintegrin |RED_cys disintegrin |	2	savignygrin	2E-044	gi|21435983	181	81	82	100	100	Ornithodoros savignyi	Disagregin	2E-012	sp|P36235|DISG_ORNMO	71.2	55	60	48	93	Ornithodoros moubata	DUF169	0.59	G2F	1.0	ND4	0.40	ND4 | PLN02912 | DUF169 | rim_protein | Kunitz_BPTI | COG5511 | ND4 |	1	142	5
gi|322812208	gi|322812208	Argas reflexus	Eukaryota; Metazoa; Arthropoda; Chelicerata; Arachnida; Acari; Parasitiformes; Ixodida; Ixodoidea; Argasidae; Argasinae; Argas.	X	X	144	Chain A, Crystal Structure Of Semet Arg R 1	ExpAA=0.00 First60=0.00 PredHel=0 Topology=o	0					CYT		15.097	8.66			KTS_cys disintegrin |	1	Chain A, Crystal Structure Of Semet Arg R 1	8E-082	gi|322812208	306	142	144	100	99		Allergen Arg r 1	3E-083	sp|Q5GQ85|ARGR1_ARGRF	306	142	159	98	90	Argas reflexus	His_binding	4E-008	BBOX	0.68	His_binding	2E-007	His_binding 2e-007| Band_7_5 | HemB | spore_YpeB | PRK07308 | PLN02903 | GlcNAc_2-epim | Gamma-COP | Fdhalpha-like |	4	24	6
gi|114153120	gi|114153120	Argas monolakensis	Eukaryota; Metazoa; Arthropoda; Chelicerata; Arachnida; Acari; Parasitiformes; Ixodida; Ixodoidea; Argasidae; Argasinae; Argas.	R	R	171	putative secreted protein	ExpAA=0.00 First60=0.00 PredHel=0 Topology=o	0					CYT		19.035	5.72			RED_cys disintegrin |	1	putative secreted protein	2E-093	gi|114153120	345	170	171	100	100	Argas monolakensis	Interleukin-28 receptor subunit alpha	0.18	sp|Q8CGK5|I28RA_MOUSE	35.4	119	535	27	22	Mus musculus	BESS	0.004	Elp3	0.38	BESS	0.018	BESS 0.018| PRK06158 | PLN00151 | PTKc_Trk | PHA03369 | DUF3367 | PHA03415 | Cse1 | fkp |	225	1	249
gi|114153004	gi|114153004	Argas monolakensis	Eukaryota; Metazoa; Arthropoda; Chelicerata; Arachnida; Acari; Parasitiformes; Ixodida; Ixodoidea; Argasidae; Argasinae; Argas.	G	G	103	7DB family	ExpAA=0.00 First60=0.00 PredHel=0 Topology=o	0					CYT		11.801	8.81			KTS_cys disintegrin |	1	7DB family	1E-060	gi|114153004	236	102	103	100	100	Argas monolakensis	Neurogenic locus notch homolog protein 2	0.50	sp|O35516|NOTC2_MOUSE	33.1	667	2470	26	27	Mus musculus	Arena_nucleocap	1.3	LIGANc	4.4	UreE	3.9	UreE | Arena_nucleocap | flgK | PRK04309 | PH_Tec |	226	1	250
gi|114152992	gi|114152992	Argas monolakensis	Eukaryota; Metazoa; Arthropoda; Chelicerata; Arachnida; Acari; Parasitiformes; Ixodida; Ixodoidea; Argasidae; Argasinae; Argas.	E	E	176	metalloprotease	ExpAA=0.01 First60=0.01 PredHel=0 Topology=o	0					CYT		19.896	5.35			ECD_cys disintegrin |	1	metalloprotease	1E-105	gi|114152992	384	175	176	100	100	Argas monolakensis	Antarease (Fragments)	2E-005	sp|P86392|VMPA_TITSE	48.5	64	227	39	29	Tityus serrulatus	Reprolysin	0.005	ZnMc	0.12	ZnMc_salivary_g	3E-025	ZnMc_salivary_gland_MPs 3e-025| ZnMc_ADAM_like 4e-009| ZnMc 8e-005| ZnMc_ADAMTS_like 4e-004| ZnMc_TACE_like 0.003| ZnMc_ADAM_fungal 0.004| Reprolysin 0.025| ZnMc_adamalysin_II_like 0.046| DUF2146 | HOT |	227	1	251
gi|25991438	gi|25991438	Ornithodoros savignyi	Eukaryota; Metazoa; Arthropoda; Chelicerata; Arachnida; Acari; Parasitiformes; Ixodida; Ixodoidea; Argasidae; Ornithodorinae; Ornithodoros.	M	M	176	TSGP4	ExpAA=6.09 First60=6.09 PredHel=0 Topology=o	0					SIG	20-21	19.414	6.81	17.187	7.76	KTS_cys disintegrin |	1	TSGP4	2E-099	gi|25991438	364	175	176	100	100	Ornithodoros savignyi	Allergen Arg r 1	3E-007	sp|Q5GQ85|ARGR1_ARGRF	54.7	149	159	24	94	Argas reflexus	His_binding	9E-037	BID_1	1.2	His_binding	4E-036	His_binding 4e-036| Glyco_hydro_44 | PseudoU_synth_RsuA | START_STARD7-like | PRK13188 | tRNA-synt_1d | PRK15316 |	4	24	6
gi|209418826	gi|209418826	Ornithodoros moubata	Eukaryota; Metazoa; Arthropoda; Chelicerata; Arachnida; Acari; Parasitiformes; Ixodida; Ixodoidea; Argasidae; Ornithodorinae; Ornithodoros.	S	S	159	putative complement inhibitor isoform 2	ExpAA=0.00 First60=0.00 PredHel=0 Topology=o	0					CYT		17.599	4.61			MLD_cys disintegrin |	1	putative complement inhibitor isoform 2	4E-090	gi|209418826	333	158	159	100	100	Ornithodoros moubata	Moubatin	6E-037	sp|Q04669|MOUB_ORNMO	152	153	171	46	90	Ornithodoros moubata	HOOK	2.6	VPS10	0.60	PRK10331	1.5	PRK10331 | PRK14973 | PRK01637 |	4	24	6
gi|172051240	gi|172051240	Ornithodoros coriaceus	Eukaryota; Metazoa; Arthropoda; Chelicerata; Arachnida; Acari; Parasitiformes; Ixodida; Ixodoidea; Argasidae; Ornithodorinae; Ornithodoros.	M	M	211	hypothetical conserved secreted protein	ExpAA=9.29 First60=9.29 PredHel=0 Topology=o	0					SIG	17-18	23.316	7.68	21.533	7.76	RGD_cys disintegrin |	1	hypothetical conserved secreted protein	1E-131	gi|172051240	470	210	211	100	100	Ornithodoros coriaceus	Zonadhesin	2E-009	sp|O88799|ZAN_MOUSE	62.4	4097	5376	29	76	Mus musculus	TIL	1E-005	START	0.28	TIL	7E-005	TIL 7e-005| PHA03095 | PTZ00214 | START |	1	142	4
gi|172051234	gi|172051234	Ornithodoros coriaceus	Eukaryota; Metazoa; Arthropoda; Chelicerata; Arachnida; Acari; Parasitiformes; Ixodida; Ixodoidea; Argasidae; Ornithodorinae; Ornithodoros.	M	M	165	salivary lipocalin	ExpAA=0.02 First60=0.02 PredHel=0 Topology=o	0					SIG	21-22	18.118	5.33	15.888	5.53	RGD_cys disintegrin |	1	salivary lipocalin	5E-095	gi|172051234	350	164	165	100	100	Ornithodoros coriaceus	Moubatin	5E-017	sp|Q04669|MOUB_ORNMO	87	152	171	34	89	Ornithodoros moubata	DUF2807	1.8	PLCXc	0.016	M14_CPT	1.6	M14_CPT | PLN02430 | PLN02909 | PI-PLCc_epsilon | PHA02976 | DUF2807 | PLN02420 |	4	24	6
gi|172051186	gi|172051186	Ornithodoros coriaceus	Eukaryota; Metazoa; Arthropoda; Chelicerata; Arachnida; Acari; Parasitiformes; Ixodida; Ixodoidea; Argasidae; Ornithodorinae; Ornithodoros.	M	M	81	savignygrin-like protein	ExpAA=15.40 First60=15.40 PredHel=1 Topology=i5-22o	1	21	72.8	6.2		SIG	21-22	9.436	5.82	7.134	5.13	RED_cys disintegrin |	1	savignygrin-like protein	1E-044	gi|172051186	182	80	81	100	100	Ornithodoros coriaceus	Disagregin	9E-009	sp|P36235|DISG_ORNMO	58.9	57	60	38	97	Ornithodoros moubata	DUF3792	0.35	DM11	0.54	MntH	0.14	MntH | araaP | DUF3792 | Trp_Tyr_perm | PTZ00359 | PHA01514 | Tenui_PVC2 | PLN03190 |	1	142	5
gi|172051182	gi|172051182	Ornithodoros coriaceus	Eukaryota; Metazoa; Arthropoda; Chelicerata; Arachnida; Acari; Parasitiformes; Ixodida; Ixodoidea; Argasidae; Ornithodorinae; Ornithodoros.	M	M	81	savignygrin-like RGD	ExpAA=16.95 First60=16.95 PredHel=1 Topology=i5-22o	1	21	72.8	6.2		SIG	21-22	8.772	6.51	6.507	4.99	RGD_cys disintegrin |	1	savignygrin-like RGD	1E-043	gi|172051182	179	80	81	100	100	Ornithodoros coriaceus	Disagregin	7E-005	sp|P36235|DISG_ORNMO	45.8	56	60	37	95	Ornithodoros moubata	YcaO	1.0	HTTM	0.33	COG0400	3.5	COG0400 | YcaO | Herpes_V23 | malQ | PRK07468 | PLN02304 |	1	142	5
gi|172051178	gi|172051178	Ornithodoros coriaceus	Eukaryota; Metazoa; Arthropoda; Chelicerata; Arachnida; Acari; Parasitiformes; Ixodida; Ixodoidea; Argasidae; Ornithodorinae; Ornithodoros.	M	M	80	savignygrin-like protein	ExpAA=15.62 First60=15.62 PredHel=1 Topology=i5-22o	1	21.3	72.5	6.3		SIG	21-22	8.662	4.79	6.46	4.36	RGD_cys disintegrin |	1	savignygrin-like protein	8E-043	gi|172051178	176	79	80	100	100	Ornithodoros coriaceus	Disagregin	1E-004	sp|P36235|DISG_ORNMO	45.1	57	60	35	97	Ornithodoros moubata	ETRAMP	2.2	KU	0.83	PRK11067	2.4	PRK11067 | S2P-M50_SpoIVFB_CBS |	1	142	5
gi|172051154	gi|172051154	Ornithodoros coriaceus	Eukaryota; Metazoa; Arthropoda; Chelicerata; Arachnida; Acari; Parasitiformes; Ixodida; Ixodoidea; Argasidae; Ornithodorinae; Ornithodoros.	M	M	166	salivary lipocalin	ExpAA=0.02 First60=0.01 PredHel=0 Topology=o	0					SIG	17-18	17.97	4.59	16.078	4.5	RGD_cys disintegrin |	1	salivary lipocalin	2E-094	gi|172051154	348	165	166	100	100	Ornithodoros coriaceus	Allergen Arg r 1	6E-017	sp|Q5GQ85|ARGR1_ARGRF	86.7	138	159	35	87	Argas reflexus	His_binding	9E-011	Gp_dh_N	0.30	His_binding	4E-010	His_binding 4e-010| PRK08955 | AIRS_C | LMO_FMN | PTZ00357 | PurM-like1 | PRK08206 | PRK11138 | COG2143 | PRK06663 |	4	24	6
gi|172051110	gi|172051110	Ornithodoros coriaceus	Eukaryota; Metazoa; Arthropoda; Chelicerata; Arachnida; Acari; Parasitiformes; Ixodida; Ixodoidea; Argasidae; Ornithodorinae; Ornithodoros.	M	M	155	dual kunitz salivary protein	ExpAA=14.13 First60=14.13 PredHel=1 Topology=o4-23i	1	12.3	2.6	85.2		SIG	22-23	17.471	9.55	15.207	9.54	RGD_cys disintegrin |RTS_cys disintegrin |	2	dual kunitz salivary protein	1E-089	gi|172051110	332	154	155	100	100	Ornithodoros coriaceus	Papilin	6E-008	sp|Q868Z9|PPN_DROME	56.6	505	2898	29	17	Drosophila melanogaster	Kunitz_BPTI	0.65	KU	0.035	PLN02283	2.9	PLN02283 | Kunitz_BPTI | KU | PRK07846 | PRK11915 | mycothione_red | KU | PRK13745 |	1	142	7
gi|172051106	gi|172051106	Ornithodoros coriaceus	Eukaryota; Metazoa; Arthropoda; Chelicerata; Arachnida; Acari; Parasitiformes; Ixodida; Ixodoidea; Argasidae; Ornithodorinae; Ornithodoros.	M	M	163	dual kunitz salivary protein	ExpAA=11.37 First60=11.37 PredHel=0 Topology=o	0					SIG	22-23	18.236	9.71	15.973	9.76	RGD_cys disintegrin |RTS_cys disintegrin |	2	dual kunitz salivary protein	2E-095	gi|172051106	351	162	163	100	100	Ornithodoros coriaceus	Papilin	6E-007	sp|Q868Z9|PPN_DROME	53.5	677	2898	27	23	Drosophila melanogaster	Kunitz_BPTI	0.27	KU	0.044	ND3	0.53	ND3 | KU | Kunitz_BPTI | XRN1 | KU | PLN02638 | CelA | Anticodon_Ia_Arg |	1	142	7
gi|172051102	gi|172051102	Ornithodoros coriaceus	Eukaryota; Metazoa; Arthropoda; Chelicerata; Arachnida; Acari; Parasitiformes; Ixodida; Ixodoidea; Argasidae; Ornithodorinae; Ornithodoros.	M	M	160	dual kunitz salivary protein	ExpAA=5.77 First60=5.77 PredHel=0 Topology=o	0					SIG	22-23	17.813	9.73	15.604	9.78	RGD_cys disintegrin |RTS_cys disintegrin |	2	dual kunitz salivary protein	5E-093	gi|172051102	343	159	160	100	100	Ornithodoros coriaceus	Papilin	6E-006	sp|Q868Z9|PPN_DROME	50.1	755	2898	28	26	Drosophila melanogaster	Kunitz_BPTI	0.49	KU	0.042	RAD52	0.86	RAD52 | Kunitz_BPTI | PLN02283 | KU | DUF387 | KU |	1	142	7
gi|172051078	gi|172051078	Ornithodoros coriaceus	Eukaryota; Metazoa; Arthropoda; Chelicerata; Arachnida; Acari; Parasitiformes; Ixodida; Ixodoidea; Argasidae; Ornithodorinae; Ornithodoros.	M	M	170	salivary lipocalin	ExpAA=0.03 First60=0.01 PredHel=0 Topology=o	0					SIG	18-19	17.89	7.44	15.875	6.73	KGD_cys disintegrin |	1	salivary lipocalin	2E-097	gi|172051078	358	169	170	100	100	Ornithodoros coriaceus	Allergen Arg r 1	6E-018	sp|Q5GQ85|ARGR1_ARGRF	90.1	153	159	35	97	Argas reflexus	RPE65	1.5	ArfGap	8.1	GH18_zymocin_al	0.056	GH18_zymocin_alpha 0.056| PRK13236 | NrdD | nifH | nifH | HofQ | fliR_like_III | PRK12830 | ND2 | NifH |	4	24	6
gi|172051054	gi|172051054	Ornithodoros coriaceus	Eukaryota; Metazoa; Arthropoda; Chelicerata; Arachnida; Acari; Parasitiformes; Ixodida; Ixodoidea; Argasidae; Ornithodorinae; Ornithodoros.	M	M	154	7DB family protein	ExpAA=0.36 First60=0.36 PredHel=0 Topology=o	0					SIG	24-25	17.657	5.02	14.944	5.41	VGD_cys disintegrin |	1	7DB family protein	6E-094	gi|172051054	346	153	154	100	100	Ornithodoros coriaceus	Disintegrin and metalloproteinase domain-containing protein 19	0.30	sp|Q9H013|ADA19_HUMAN	34.3	97	955	29	10	Homo sapiens	Neur	1.3	FIMAC	1.3	PLN02330	2.1	PLN02330 | PRK14906 | PRK07979 | PLN02402 | Neur | PLN02628 | PRK10681 | Bromo_WDR9_I_like |	240	1	267
gi|114153078	gi|114153078	Argas monolakensis	Eukaryota; Metazoa; Arthropoda; Chelicerata; Arachnida; Acari; Parasitiformes; Ixodida; Ixodoidea; Argasidae; Argasinae; Argas.	M	M	146	BTSP	ExpAA=0.04 First60=0.00 PredHel=0 Topology=o	0					SIG	17-18	17.299	10.16	15.412	10.32	KTS_cys disintegrin |	1	BTSP	3E-081	gi|114153078	304	145	146	100	100	Argas monolakensis	Spermatid-specific protein T1	0.018	sp|P80001|PRT1_SEPOF	38.1	52	78	40	68	Sepia officinalis	TT_ORF1	0.17	HA2	0.61	PHA00451	0.019	PHA00451 0.019| rne | rfc | PRK14552 | TT_ORF1 | Gyro_capsid | rpsT | betaine_BetI | Pico_P2A | OXR1 |	37	2	268
gi|114153060	gi|114153060	Argas monolakensis	Eukaryota; Metazoa; Arthropoda; Chelicerata; Arachnida; Acari; Parasitiformes; Ixodida; Ixodoidea; Argasidae; Argasinae; Argas.	M	M	99	BTSP	ExpAA=16.34 First60=16.34 PredHel=1 Topology=i7-24o	1	17.2	75.8	7.1		SIG	23-24	11.18	6.11	8.833	5.19	VGD_cys disintegrin |	1	BTSP	3E-057	gi|114153060	224	98	99	100	100	Argas monolakensis	Phenylalanyl-tRNA synthetase beta chain	5.6	sp|Q550D2|SYFB_DICDI	29.6	25	617	46	4	Dictyostelium discoideum	TraI_2	0.74	LY	1.0	PLN02337	1.6	PLN02337 | COG5406 | PolC | PRK14291 | PRK13377 | IgV_L_kappa |	1	142	5
gi|114153000	gi|114153000	Argas monolakensis	Eukaryota; Metazoa; Arthropoda; Chelicerata; Arachnida; Acari; Parasitiformes; Ixodida; Ixodoidea; Argasidae; Argasinae; Argas.	M	M	87	Kunitz domain	ExpAA=0.20 First60=0.20 PredHel=0 Topology=o	0					SIG	20-21	9.849	9.1	7.683	9.04	RTS_cys disintegrin |	1	Kunitz domain	4E-047	gi|114153000	191	86	87	100	100	Argas monolakensis	Protein AMBP	2E-004	sp|Q60559|AMBP_MESAU	44.3	109	349	41	32	Mesocricetus auratus	Kunitz_BPTI	0.61	KU	0.046	KU	0.70	KU | PHA02974 | PRK11440 | Kunitz_BPTI | KU | PolY_Pol_iota | pleD | PHA03237 |	1	142	5
gi|114152986	gi|114152986	Argas monolakensis	Eukaryota; Metazoa; Arthropoda; Chelicerata; Arachnida; Acari; Parasitiformes; Ixodida; Ixodoidea; Argasidae; Argasinae; Argas.	M	M	97	BTSP	ExpAA=4.72 First60=4.71 PredHel=0 Topology=o	0					SIG	22-23	10.737	8.58	8.446	8.84	MLD_cys disintegrin |	1	BTSP	3E-051	gi|114152986	204	96	97	100	100	Argas monolakensis	Protein DDB_G0268328	0.87	sp|Q55GD2|Y8328_DICDI	32.3	32	3779	34	1	Dictyostelium discoideum	Nrap	0.80	FYRN	0.68	coaE	1.1	coaE | PRK04217 | Nrap | nsp8 | COG4239 | PRK11915 | PRK15075 | mena_SCO4490 |	1	142	269
gi|114152968	gi|114152968	Argas monolakensis	Eukaryota; Metazoa; Arthropoda; Chelicerata; Arachnida; Acari; Parasitiformes; Ixodida; Ixodoidea; Argasidae; Argasinae; Argas.	M	M	107	monogrin 1B	ExpAA=2.31 First60=2.31 PredHel=0 Topology=o	0					SIG	20-21	11.991	8.87	9.835	8.96	RGD_cys disintegrin |KGD_cys disintegrin |	2	monogrin 1B	8E-059	gi|114152968	229	106	107	100	100	Argas monolakensis	GATA zinc finger domain-containing protein 23	0.39	sp|Q54L82|GTAW_DICDI	33.5	40	295	39	14	Dictyostelium discoideum	BDV_P40	0.74	ILWEQ	0.23	COG3398	0.69	COG3398 | PRK06854 | BDV_P40 | AslB | PHA01817 | spore_YpeB | GLDHase | Commd4 | DAP10 |	1	142	5
gi|114152966	gi|114152966	Argas monolakensis	Eukaryota; Metazoa; Arthropoda; Chelicerata; Arachnida; Acari; Parasitiformes; Ixodida; Ixodoidea; Argasidae; Argasinae; Argas.	A	A	87	monogrin 1A	ExpAA=0.00 First60=0.00 PredHel=0 Topology=i	0					CYT		9.719	8.28			RGD_cys disintegrin |	1	monogrin 1A	3E-047	gi|114152966	191	86	87	100	100	Argas monolakensis	Carboxypeptidase inhibitor SmCI	0.51	sp|P84875|PCPI_SABMA	33.1	155	165	32	95	Sabellastarte magnifica	Plexin_cytopl	2.2	ILWEQ	0.18	PRK06854	3.5	PRK06854 | tynA |	1	142	5
gi|114152962	gi|114152962	Argas monolakensis	Eukaryota; Metazoa; Arthropoda; Chelicerata; Arachnida; Acari; Parasitiformes; Ixodida; Ixodoidea; Argasidae; Argasinae; Argas.	M	M	144	monobin	ExpAA=0.01 First60=0.01 PredHel=0 Topology=o	0					SIG	16-17	15.378	4.3	13.706	4.21	RGD_cys disintegrin |	1	monobin	3E-083	gi|114152962	311	143	144	100	100	Argas monolakensis	Ornithodorin	2E-015	sp|P56409|ORNT_ORNMO	81.3	111	119	35	94	Ornithodoros moubata	Kunitz_BPTI	3E-007	KU	2E-008	Kunitz_BPTI	2E-006	Kunitz_BPTI 2e-006| KU 2e-006| KU 3e-005| BrnQ |	1	142	7
gi|114152958	gi|114152958	Argas monolakensis	Eukaryota; Metazoa; Arthropoda; Chelicerata; Arachnida; Acari; Parasitiformes; Ixodida; Ixodoidea; Argasidae; Argasinae; Argas.	M	M	183	lipocalin	ExpAA=0.21 First60=0.20 PredHel=0 Topology=o	0					SIG	18-19	20.381	7.57	18.553	7.76	RTS_cys disintegrin |	1	lipocalin	1E-104	gi|114152958	382	182	183	100	100	Argas monolakensis	Agglutinin-like protein 3	0.60	sp|O74623|ALS3_CANAL	33.9	91	1119	24	8	Candida albicans	His_binding	3E-008	Transket_pyr	0.52	His_binding	1E-007	His_binding 1e-007| PLN02669 | PRK09221 | CLECT_NK_receptors_like | AAI_SS |	4	24	6
gi|149287172	gi|149287172	Ornithodoros parkeri	Eukaryota; Metazoa; Arthropoda; Chelicerata; Arachnida; Acari; Parasitiformes; Ixodida; Ixodoidea; Argasidae; Ornithodorinae; Ornithodoros.	M	M	78	savignygrin-like 1	ExpAA=5.88 First60=5.88 PredHel=0 Topology=o	0					SIG	21-22	8.767	5.47	6.473	5.09	RGD_cys disintegrin |	1	savignygrin-like 1	9E-041	gi|149287172	169	77	78	100	100	Ornithodoros parkeri	Disagregin	0.060	sp|P36235|DISG_ORNMO	36.2	53	60	33	90	Ornithodoros moubata	Kunitz_BPTI	0.52	KU	0.047	MntH	0.47	MntH | RIFIN | RNase_HI_prokaryote_like | Kunitz_BPTI | Peptidase_M14-like_1_5 | KU | KdgK | KU | CstA |	1	142	5
gi|149287150	gi|149287150	Ornithodoros parkeri	Eukaryota; Metazoa; Arthropoda; Chelicerata; Arachnida; Acari; Parasitiformes; Ixodida; Ixodoidea; Argasidae; Ornithodorinae; Ornithodoros.	M	M	158	dual kunitz salivary protein	ExpAA=6.51 First60=6.51 PredHel=0 Topology=o	0					SIG	22-23	18.129	9.37	15.745	9.36	RGD_cys disintegrin |	1	dual kunitz salivary protein	2E-093	gi|149287150	344	157	158	100	100	Ornithodoros parkeri	Papilin	7E-006	sp|Q868Z9|PPN_DROME	49.7	642	2898	25	22	Drosophila melanogaster	Kunitz_BPTI	0.15	KU	0.060	Kunitz_BPTI	0.71	Kunitz_BPTI | TIGR03790 | PLN02604 | YvcK_like | KU | KU | Tex | PRK11653 | PLN02204 |	1	142	7
gi|149287112	gi|149287112	Ornithodoros parkeri	Eukaryota; Metazoa; Arthropoda; Chelicerata; Arachnida; Acari; Parasitiformes; Ixodida; Ixodoidea; Argasidae; Ornithodorinae; Ornithodoros.	M	M	174	salivary secreted lipocalin	ExpAA=8.80 First60=8.79 PredHel=0 Topology=o	0					SIG	20-21	18.875	6.06	16.665	6.08	RGD_cys disintegrin |	1	salivary secreted lipocalin	1E-098	gi|149287112	362	173	174	100	100	Ornithodoros parkeri	Allergen Arg r 1	4E-006	sp|Q5GQ85|ARGR1_ARGRF	50.8	135	159	26	86	Argas reflexus	His_binding	7E-015	ML	0.33	His_binding	4E-014	His_binding 4e-014| DUF316 | PLN03059 | rpoB | PRK15273 | F420_cofD | PqiA | PRK06464 |	4	24	6
gi|149287008	gi|149287008	Ornithodoros parkeri	Eukaryota; Metazoa; Arthropoda; Chelicerata; Arachnida; Acari; Parasitiformes; Ixodida; Ixodoidea; Argasidae; Ornithodorinae; Ornithodoros.	M	M	184	salivary lipocalin	ExpAA=15.18 First60=15.18 PredHel=0 Topology=o	0					SIG	20-21	19.972	6.14	17.839	6.93	KGD_cys disintegrin |	1	salivary lipocalin	1E-105	gi|149287008	385	183	184	100	100	Ornithodoros parkeri	Allergen Arg r 1	0.025	sp|Q5GQ85|ARGR1_ARGRF	38.5	130	159	25	82	Argas reflexus	His_binding	2E-016	THN	1.4	His_binding	8E-016	His_binding 8e-016| DUF1032 | COG3608 |	4	24	6
gi|149286924	gi|149286924	Ornithodoros parkeri	Eukaryota; Metazoa; Arthropoda; Chelicerata; Arachnida; Acari; Parasitiformes; Ixodida; Ixodoidea; Argasidae; Ornithodorinae; Ornithodoros.	M	M	100	acid tail salivary protein	ExpAA=0.17 First60=0.17 PredHel=0 Topology=o	0					SIG	16-17	11.19	5.42	9.601	5.09	RGD_cys disintegrin |	1	acid tail salivary protein	2E-055	gi|149286924	218	99	100	100	100	Ornithodoros parkeri	Thrombospondin-4	0.39	sp|Q06441|TSP4_XENLA	33.5	47	955	37	5	Xenopus laevis	TSGP1	5E-008	THN	0.20	TSGP1	2E-007	TSGP1 2e-007| PRK11678 | PLN02629 | Prismane |	1	142	5
gi|149286898	gi|149286898	Ornithodoros parkeri	Eukaryota; Metazoa; Arthropoda; Chelicerata; Arachnida; Acari; Parasitiformes; Ixodida; Ixodoidea; Argasidae; Ornithodorinae; Ornithodoros.	M	M	78	savignygrin-like 2	ExpAA=14.27 First60=14.27 PredHel=1 Topology=o5-22i	1	21.8	6.4	71.8		SIG	21-22	8.874	5.67	6.512	5.07	RGD_cys disintegrin |	1	savignygrin-like 2	7E-041	gi|149286898	170	77	78	100	100	Ornithodoros parkeri	Papilin	1.1	sp|O76840|PPN1_CAEEL	32	43	2167	33	2	Caenorhabditis elegans	DUF3181	1.9	KU	0.13	PRK09532	0.98	PRK09532 | PLN02491 | indolpyr_decarb | PLN02443 | TPP_PDC_IPDC | PRK11192 | COG3961 | DUF3181 | Zn_ADH9 |	1	142	5
Worms
Hirudinea
gi|129230	gi|129230	Placobdella ornata	Eukaryota; Metazoa; Annelida; Clitellata; Hirudinida; Hirudinea; Rhynchobdellida; Glossiphoniidae; Placobdella.	I	I	50	Ornatin-E	ExpAA=0.00 First60=0.00 PredHel=0 Topology=o	0					CYT		5.742	7.75			RGD_cys disintegrin |	1	Ornatin-E gi|242332|gb|AAB20874.1| ornatin E	9E-025	gi|129230	116	49	50	100	100	Placobdella ornata	Ornatin-E	4E-026	sp|P25514|ORNE_PLAOR	116	49	50	100	100	Placobdella ornata	Ornatin	2E-012	SEP	2.1	Ornatin	9E-012	Ornatin 9e-012| chitinase_glyco_hydro_19 | rpoC_TIGR |	1	142	4
gi|2497602	gi|2497602	Hirudo medicinalis	Eukaryota; Metazoa; Annelida; Clitellata; Hirudinida; Hirudinea; Arhynchobdellida; Hirudiniformes; Hirudinidae; Hirudo.	E	E	400	Laminin subunit B	ExpAA=0.00 First60=0.00 PredHel=0 Topology=o	0					CYT		43.293	4.88			ECD_cys disintegrin |WGD_cys disintegrin |	2	Laminin subunit B gi|974619|gb|AAC46862.1| laminin B-chain	0.0	gi|2497602	823	399	400	100	100	Hirudo medicinalis	Laminin subunit B (Fragment)	0.0	sp|Q25092|LAMB_HIRME	823	399	400	100	100	Hirudo medicinalis	Laminin_EGF	1E-008	EGF_Lam	1E-010	EGF_Lam	1E-008	EGF_Lam 1e-008| Laminin_EGF 6e-008| EGF_Lam 8e-008| SMC_prok_B 2e-004| PRK03918 4e-004| type_I_hlyD 4e-004| Smc 0.001| Laminin_I 0.011| PRK01156 0.013| chaperone_ClpB 0.014|	218	2	237
gi|157830806	gi|157830806	Macrobdella decora	Eukaryota; Metazoa; Annelida; Clitellata; Hirudinida; Hirudinea; Arhynchobdellida; Hirudiniformes; Hirudinidae; Macrobdella.	A	A	39	Chain A, Structure Of The Rgd Protein Decorsin: Conserved Motif And Distinct Function In Leech Proteins That Affect Blood Clotting	ExpAA=0.00 First60=0.00 PredHel=0 Topology=o	0					CYT		4.392	4.5			RGD_cys disintegrin |	1	Decorsin gi|157830806|pdb|1DEC|A Chain A, Structure Of The Rgd Protein Decorsin:	1E-018	gi|118410	96.7	38	39	100	100		Decorsin	4E-020	sp|P17350|DECO_MACDE	96.7	38	39	100	100	Macrobdella decora	Terminase_GpA	8.1	TR_FER	2.1				1	142	4
gi|129228	gi|129228	Placobdella ornata	Eukaryota; Metazoa; Annelida; Clitellata; Hirudinida; Hirudinea; Rhynchobdellida; Glossiphoniidae; Placobdella.	I	I	52	Ornatin-C	ExpAA=0.00 First60=0.00 PredHel=0 Topology=o	0					CYT		5.848	8.29			RGD_cys disintegrin |	1	Ornatin-C gi|242331|gb|AAB20873.1| ornatin C	2E-025	gi|129228	119	51	52	100	100	Placobdella ornata=turtle leech, Peptide, 52 aa	Ornatin-C	7E-027	sp|P25512|ORNC_PLAOR	119	51	52	100	100	Placobdella ornata	Ornatin	1E-011	HOLI	2.0	Ornatin	5E-011	Ornatin 5e-011| chitinase_glyco_hydro_19 | rpoC_TIGR |	1	142	4
gi|129226	gi|129226	Placobdella ornata	Eukaryota; Metazoa; Annelida; Clitellata; Hirudinida; Hirudinea; Rhynchobdellida; Glossiphoniidae; Placobdella.	I	I	41	Ornatin-A3	ExpAA=0.00 First60=0.00 PredHel=0 Topology=o	0					CYT		4.392	7.76			RGD_cys disintegrin |	1	Ornatin-A3 gi|242329|gb|AAB20871.1| ornatin A3	1E-018	gi|129226	96.7	40	41	100	100	Placobdella ornata=turtle leech, Peptide, 41 aa	Ornatin-A3	4E-020	sp|P25510|ORN3_PLAOR	96.7	40	41	100	100	Placobdella ornata	Ornatin	7E-008	TGc	8.6	Ornatin	3E-007	Ornatin 3e-007| chitinase_glyco_hydro_19 |	1	142	4
gi|242328	gi|242328	Placobdella ornata	Eukaryota; Metazoa; Annelida; Clitellata; Hirudinida; Hirudinea; Rhynchobdellida; Glossiphoniidae; Placobdella.	I	I	41	ornatin A2	ExpAA=0.00 First60=0.00 PredHel=0 Topology=i	0					CYT		4.459	8.32			RGD_cys disintegrin |	1	Ornatin-A2 gi|242328|gb|AAB20870.1| ornatin A2	6E-019	gi|129225	97.4	40	41	100	100	Placobdella ornata=turtle leech, Peptide, 41 aa	Ornatin-A2	2E-020	sp|P25509|ORN2_PLAOR	97.4	40	41	100	100	Placobdella ornata	Ornatin	8E-010	S4	6.7	Ornatin	4E-009	Ornatin 4e-009|	1	142	4
gi|170292205	gi|170292205	Hirudo medicinalis	Eukaryota; Metazoa; Annelida; Clitellata; Hirudinida; Hirudinea; Arhynchobdellida; Hirudiniformes; Hirudinidae; Hirudo.	V	V	66	Chain A, The Nmr Solution Structure Of Recombinant Rgd-Hirudin	ExpAA=0.00 First60=0.00 PredHel=0 Topology=o	0					CYT		7.044	4.24			RGD_cys disintegrin |	1	Chain A, The Nmr Solution Structure Of Recombinant Rgd-Hirudin	2E-034	gi|170292205	149	65	66	100	100		Hirudin-PA	3E-031	sp|P09944|HIRPA_HIRME	133	65	66	87	100	Hirudo medicinalis	Hirudin	1E-022	TR_FER	0.15	Hirudin	5E-022	Hirudin 5e-022|	1	142	4
gi|295881682	gi|295881682	Helobdella sp. SJC-2009	Eukaryota; Metazoa; Annelida; Clitellata; Hirudinida; Hirudinea; Rhynchobdellida; Glossiphoniidae; Helobdella.	C	C	317	wnt11A	ExpAA=0.04 First60=0.00 PredHel=0 Topology=o	0					CYT		34.779	9.36			ECD_cys disintegrin |	1	wnt11A	0.0	gi|295881682	647	316	317	100	100	Helobdella sp. SJC-2009	Protein Wnt-11b	2E-070	sp|P49893|WN11B_XENLA	265	305	353	42	87	Xenopus laevis	wnt	1E-088	WNT1	6E-079	wnt	6E-088	wnt 6e-088| WNT1 7e-077| ilvD | COG3489 | PHA00430 | Glyco_hydro_35 | PRK06048 | PRK10094 | GCD | DUF212 |	13	5	16
gi|520513	gi|520513	Helobdella stagnalis	Eukaryota; Metazoa; Annelida; Clitellata; Hirudinida; Hirudinea; Rhynchobdellida; Glossiphoniidae; Helobdella.	H	H	1337	RNA polymerase II, largest subunit	ExpAA=0.02 First60=0.01 PredHel=0 Topology=o	0					CYT		151.84	8.47			KTS_cys disintegrin |	1	RNA polymerase II, largest subunit	0.0	gi|520513	2675	1336	1337	100	100	Helobdella stagnalis	DNA-directed RNA polymerase II subunit RPB1	0.0	sp|P08775|RPB1_MOUSE	2060	1342	1970	74	68	Mus musculus	RNA_pol_Rpb1_5	2E-090	RPOLA_N	1E-139	PRK08566	0.0	PRK08566 | RNA_pol_rpoA1 | RNAP_II_Rpb1_C | PRK14977 e-178| RpoC e-166| RPOLA_N e-137| RNA_pol_Rpb1_5 1e-089| RNA_pol_Rpb1_1 3e-084| RNA_pol_Rpb1_6 5e-079| RNA_pol_Rpb1_2 1e-074|	33	3	37
Rhabditida includes TIL and antigen 5 family
gi|183604254	gi|183604254	Dictyocaulus capreolus	Eukaryota; Metazoa; Nematoda; Chromadorea; Rhabditida; Strongylida; Trichostrongyloidea; Dictyocaulidae; Dictyocaulinae; Dictyocaulus.	S	S	124	major sperm protein	ExpAA=0.00 First60=0.00 PredHel=0 Topology=o	0					CYT		14.071	7.68			RED_cys disintegrin |	1	major sperm protein	3E-070	gi|183604200	267	123	124	100	100	Dictyocaulus viviparus	Major sperm protein 10/36/56/76	5E-063	sp|P05634|MSP10_CAEEL	239	123	127	87	98	Caenorhabditis elegans	Motile_Sperm	1E-022	SPRY	1.1	Motile_Sperm	5E-022	Motile_Sperm 5e-022| SCS2 | MenD | SP2 | RDD | GCM | PRK09116 | truB | WGR_MMR_like | PLN03123 |	2	101	1
gi|183604250	gi|183604250	Dictyocaulus eckerti	Eukaryota; Metazoa; Nematoda; Chromadorea; Rhabditida; Strongylida; Trichostrongyloidea; Dictyocaulidae; Dictyocaulinae; Dictyocaulus.	S	S	124	major sperm protein	ExpAA=0.00 First60=0.00 PredHel=0 Topology=o	0					CYT		14.071	7.68			RED_cys disintegrin |	1	major sperm protein	3E-070	gi|183604200	267	123	124	100	100	Dictyocaulus viviparus	Major sperm protein 10/36/56/76	5E-063	sp|P05634|MSP10_CAEEL	239	123	127	87	98	Caenorhabditis elegans	Motile_Sperm	1E-022	SPRY	1.1	Motile_Sperm	5E-022	Motile_Sperm 5e-022| SCS2 | MenD | SP2 | RDD | GCM | PRK09116 | truB | WGR_MMR_like | PLN03123 |	2	101	1
gi|183604398	gi|183604398	Dictyocaulus viviparus	Eukaryota; Metazoa; Nematoda; Chromadorea; Rhabditida; Strongylida; Trichostrongyloidea; Dictyocaulidae; Dictyocaulinae; Dictyocaulus.	S	S	124	major sperm protein	ExpAA=0.00 First60=0.00 PredHel=0 Topology=o	0					CYT		14.066	7.68			RED_cys disintegrin |	1	major sperm protein	3E-070	gi|183604200	267	123	124	100	100	Dictyocaulus viviparus	Major sperm protein 10/36/56/76	5E-063	sp|P05634|MSP10_CAEEL	239	123	127	87	98	Caenorhabditis elegans	Motile_Sperm	1E-022	SPRY	1.1	Motile_Sperm	5E-022	Motile_Sperm 5e-022| SCS2 | MenD | SP2 | RDD | GCM | PRK09116 | truB | WGR_MMR_like | PLN03123 |	2	101	1
gi|6435734	gi|6435734	Ancylostoma caninum	Eukaryota; Metazoa; Nematoda; Chromadorea; Rhabditida; Strongylida; Ancylostomatoidea; Ancylostomatidae; Ancylostomatinae; Ancylostoma.	K	K	85	Chain A, Anticoagulant Protein From The Nematode Ancylostoma Caninum	ExpAA=0.00 First60=0.00 PredHel=0 Topology=i	0					CYT		9.769	4.31			ECD_cys disintegrin |	1	Chain A, Anticoagulant Protein From The Nematode Ancylostoma Caninum	4E-048	gi|6435734	194	84	85	100	100		Probable protease inhibitor Egf0.4a	1E-005	sp|Q4ZJZ2|EG04A_MDBV	48.5	61	103	36	60	Microplitis demolitor bracovirus	TIL	1E-004	CUB	1.3	TIL	5E-004	TIL 5e-004| Coatamer_beta_C | PLN02440 |	1	142	4
gi|67772459	gi|67772459	Ancylostoma caninum	Eukaryota; Metazoa; Nematoda; Chromadorea; Rhabditida; Strongylida; Ancylostomatoidea; Ancylostomatidae; Ancylostomatinae; Ancylostoma.	M	M	355	TGF-beta signaling molecule precursor	ExpAA=2.27 First60=2.26 PredHel=0 Topology=o	0					SIG	29-30	40.058	5.86	36.724	5.6	RGD_cys disintegrin |	1	TGF-beta signaling molecule precursor	0.0	gi|67772459	725	354	355	100	100	Ancylostoma caninum	Dauer larva development regulatory growth factor daf-7	2E-054	sp|P92172|DAF7_CAEEL	213	327	350	36	94	Caenorhabditis elegans	TGFb_propeptide	6E-021	TGFB	3E-022	TGFB	3E-020	TGFB 3e-020| TGFb_propeptide 3e-020| TGF_beta 1e-011| PHA02913 8e-006| Gpi16 | COG2269 | PhnD | PRK08566 | pbp2_mrdA | genX |	24	4	28
gi|37788402	gi|37788402	Dictyocaulus viviparus	Eukaryota; Metazoa; Nematoda; Chromadorea; Rhabditida; Strongylida; Trichostrongyloidea; Dictyocaulidae; Dictyocaulinae; Dictyocaulus.	M	M	613	neuronal acetylcholinesterase precursor	ExpAA=26.55 First60=19.26 PredHel=1 Topology=i5-27o	1	3.6	95.6	0.8		SIG	22-23	68.857	6.79	66.34	6.66	RGD_cys disintegrin |	1	neuronal acetylcholinesterase precursor	0.0	gi|37788402	1264	612	613	100	100	Dictyocaulus viviparus	Acetylcholinesterase 4	7E-097	sp|Q9NDG8|ACE4_CAEBR	355	506	604	40	84	Caenorhabditis briggsae	COesterase	1E-132	POLXc	0.41	COesterase	1E-131	COesterase e-131| Esterase_lipase 5e-096| PnbA 2e-069| Abhydrolase_3 2e-011| Aes 7e-011| PRK10162 6e-005| McrB | UgpB | F420_MSMEG_4879 | PRK12316 |	9	7	12
gi|44935194	gi|44935194	Dictyocaulus viviparus	Eukaryota; Metazoa; Nematoda; Chromadorea; Rhabditida; Strongylida; Trichostrongyloidea; Dictyocaulidae; Dictyocaulinae; Dictyocaulus.	A	A	592	putative neuromuscular acetylcholinesterase	ExpAA=7.34 First60=0.05 PredHel=0 Topology=o	0					CYT		66.345	6.66			RGD_cys disintegrin |	1	putative neuromuscular acetylcholinesterase	0.0	gi|44935194	1220	591	592	100	100	Dictyocaulus viviparus	Acetylcholinesterase 4	8E-098	sp|Q9NDG8|ACE4_CAEBR	358	506	604	40	84	Caenorhabditis briggsae	COesterase	1E-133	POLXc	0.18	COesterase	1E-132	COesterase e-132| Esterase_lipase 6e-097| PnbA 1e-070| Abhydrolase_3 1e-011| Aes 5e-011| PRK10162 6e-005| UgpB | McrB | F420_MSMEG_4879 | PRK12316 |	9	7	12
gi|1203803	gi|1203803	Ancylostoma caninum	Eukaryota; Metazoa; Nematoda; Chromadorea; Rhabditida; Strongylida; Ancylostomatoidea; Ancylostomatidae; Ancylostomatinae; Ancylostoma.	L	L	91	anti-coagulant protein C2 precursor	ExpAA=0.00 First60=0.00 PredHel=0 Topology=o	0					CYT		10.379	4.31			ECD_cys disintegrin |	1	anti-coagulant protein C2 precursor	9E-052	gi|1203803	206	90	91	100	100	Ancylostoma caninum	Probable protease inhibitor Egf0.4a	1E-005	sp|Q4ZJZ2|EG04A_MDBV	48.5	61	103	36	60	Microplitis demolitor bracovirus	TIL	9E-005	CUB	1.5	TIL	4E-004	TIL 4e-004| Coatamer_beta_C | PLN02440 |	1	142	4
gi|312271215	gi|312271215	Angiostrongylus cantonensis	Eukaryota; Metazoa; Nematoda; Chromadorea; Rhabditida; Strongylida; Metastrongyloidea; Angiostrongylidae; Angiostrongylus.	M	M	443	hemoglobinase-type cysteine proteinase	ExpAA=2.40 First60=2.40 PredHel=0 Topology=o	0					SIG	18-19	49.884	5.8	47.945	5.8	VGD_cys disintegrin |	1	hemoglobinase-type cysteine proteinase	0.0	gi|312271215	918	442	443	100	100	Angiostrongylus cantonensis	Legumain	8E-087	sp|Q95M12|LGMN_BOVIN	321	428	433	41	99	Bos taurus	Peptidase_C13	1E-111	RasGAP	1.0	Peptidase_C13	1E-110	Peptidase_C13 e-110| GPI8 7e-027| HycE | Ku_PK_bind | PRK07008 | MPP_Ted1 | LPLAT_DHAPAT-like | sdhA | PRK14467 | MRJP |	217	2	236
gi|46811814	gi|46811814	Dictyocaulus viviparus	Eukaryota; Metazoa; Nematoda; Chromadorea; Rhabditida; Strongylida; Trichostrongyloidea; Dictyocaulidae; Dictyocaulinae; Dictyocaulus.	M	M	206	hypothetical protein L3ni22	ExpAA=0.15 First60=0.15 PredHel=0 Topology=o	0					SIG	16-17	24.62	6.07	22.848	5.83	ECD_cys disintegrin |	1	hypothetical protein L3ni22	1E-122	gi|46811814	442	205	206	100	100	Dictyocaulus viviparus	Protein diaphanous homolog 1	0.45	sp|O60610|DIAP1_HUMAN	34.7	120	1272	28	10	Homo sapiens	Cse1	0.81	TOPEUc	0.060	secD	0.23	secD | PBP1_ABC_sugar_binding_like_5 | aspS_bact | HPPD_C_like | PRK11477 | PRK06596 | GRX_euk | PRK14036 | Cse1 | DUF3825 |	244	1	274
gi|145652303	gi|145652303	Ancylostoma caninum	Eukaryota; Metazoa; Nematoda; Chromadorea; Rhabditida; Strongylida; Ancylostomatoidea; Ancylostomatidae; Ancylostomatinae; Ancylostoma.	N	N	80	anticoagulant protein 11	ExpAA=0.00 First60=0.00 PredHel=0 Topology=o	0					CYT		9.309	4.75			ECD_cys disintegrin |	1	anticoagulant protein 11	2E-045	gi|145652303	185	79	80	100	100	Ancylostoma caninum	Probable protease inhibitor Egf0.4b	7E-006	sp|Q4ZJY9|EG04B_MDBV	49.3	61	103	36	60	Microplitis demolitor bracovirus	TIL	2E-004	IPPc	0.96	TIL	9E-004	TIL 9e-004| benzyl_alcohol_DH | PLN02440 | SRP14 |	1	142	4
gi|37925414	gi|37925414	Ancylostoma caninum	Eukaryota; Metazoa; Nematoda; Chromadorea; Rhabditida; Strongylida; Ancylostomatoidea; Ancylostomatidae; Ancylostomatinae; Ancylostoma.	K	K	84	anticoagulant protein c3	ExpAA=0.00 First60=0.00 PredHel=0 Topology=i	0					CYT		9.792	4.38			ECD_cys disintegrin |	1	anticoagulant protein c3	1E-047	gi|37925414	192	83	84	100	100	Ancylostoma caninum	Probable protease inhibitor Egf0.4b	5E-007	sp|Q4ZJY9|EG04B_MDBV	53.1	61	103	40	60	Microplitis demolitor bracovirus	TIL	0.005	CUB	1.5	TIL	0.025	TIL 0.025| PRK14650 | DUF766 | PLN02440 | PLN02400 |	1	142	4
gi|32454255	gi|32454255	Ancylostoma caninum	Eukaryota; Metazoa; Nematoda; Chromadorea; Rhabditida; Strongylida; Ancylostomatoidea; Ancylostomatidae; Ancylostomatinae; Ancylostoma.	M	M	99	anticoagulant protein c4	ExpAA=0.02 First60=0.02 PredHel=0 Topology=o	0					SIG	19-20	11.329	5.16	9.196	4.97	ECD_cys disintegrin |	1	anticoagulant protein c4	5E-056	gi|32454255	220	98	99	100	100	Ancylostoma caninum	Mucin-6	2E-004	sp|Q80T03|MUC6_MOUSE	44.3	74	2850	28	3	Mus musculus	TIL	5E-006	IPPc	0.79	TIL	2E-005	TIL 2e-005| benzyl_alcohol_DH | PRK08493 |	1	142	4
gi|15028473	gi|15028473	Ancylostoma caninum	Eukaryota; Metazoa; Nematoda; Chromadorea; Rhabditida; Strongylida; Ancylostomatoidea; Ancylostomatidae; Ancylostomatinae; Ancylostoma.	E	E	181	platelet inhibitor	ExpAA=0.00 First60=0.00 PredHel=0 Topology=o	0					CYT		20.343	4.76			KGD_cys disintegrin |	1	platelet inhibitor	1E-106	gi|15028473	388	180	181	100	100	Ancylostoma caninum	Ancylostoma secreted protein	2E-020	sp|Q16937|ASP_ANCCA	98.6	382	424	32	90	Ancylostoma caninum	CAP	3E-012	SCP	2E-018	SCP	2E-016	SCP 2e-016| SCP_euk 3e-016| CAP 2e-011| SCP 6e-009| SCP_GAPR-1_like 1e-005| SCP_PRY1_like 2e-005| SCP_CRISP 4e-005| SCP_GLIPR-1_like 5e-004| SCP_HrTT-1 0.001| SCP_PR-1_like 0.024|	11	5	275
gi|13346812	gi|13346812	Haemonchus contortus	Eukaryota; Metazoa; Nematoda; Chromadorea; Rhabditida; Strongylida; Trichostrongyloidea; Haemonchidae; Haemonchinae; Haemonchus.	M	M	1572	thrombospondin	ExpAA=0.15 First60=0.15 PredHel=0 Topology=o	0					SIG	16-17	171.891	4.88	170.307	4.87	KGD_cys disintegrin |KTS_cys disintegrin |	2	thrombospondin	0.0	gi|13346812	3457	1571	1572	100	100	Haemonchus contortus	Papilin	0.0	sp|O76840|PPN1_CAEEL	2404	1955	2167	68	90	Caenorhabditis elegans	ADAM_spacer1	5E-042	KU	1E-016	ADAM_spacer1	3E-041	ADAM_spacer1 3e-041| KU 2e-014| Kunitz_BPTI 5e-014| KU 3e-012| PAT1 6e-007| DUF1421 6e-005| TSP1 1e-004| PRK10263 1e-004| PRK03427 4e-004| TSP_1 0.003|	245	1	276
gi|290784590	gi|290784590	Nippostrongylus brasiliensis	Eukaryota; Metazoa; Nematoda; Chromadorea; Rhabditida; Strongylida; Trichostrongyloidea; Heligmonellidae; Nippostrongylinae; Nippostrongylus.	P	P	117	major sperm protein 1	ExpAA=0.00 First60=0.00 PredHel=0 Topology=o	0					CYT		13.253	8.63			RED_cys disintegrin |	1	major sperm protein 1	1E-065	gi|290784590	252	116	117	100	100	Nippostrongylus brasiliensis	Major sperm protein 10/36/56/76	1E-058	sp|P05634|MSP10_CAEEL	224	116	127	88	92	Caenorhabditis elegans	Motile_Sperm	3E-022	SPRY	0.89	Motile_Sperm	2E-021	Motile_Sperm 2e-021| MenD 0.043| SCS2 | SP2 | STKc_nPKC_epsilon | GCM | PRK11536 | RDD | DUF2366 | PRK09116 |	2	101	1
gi|2905792	gi|2905792	Haemonchus contortus	Eukaryota; Metazoa; Nematoda; Chromadorea; Rhabditida; Strongylida; Trichostrongyloidea; Haemonchidae; Haemonchinae; Haemonchus.	M	M	459	putative secretory protein precursor	ExpAA=0.27 First60=0.26 PredHel=0 Topology=o	0					SIG	18-19	50.937	5.59	49.026	5.59	VGD_cys disintegrin |	1	putative secretory protein precursor	0.0	gi|2905792	1001	458	459	100	100	Haemonchus contortus	Ancylostoma secreted protein	2E-051	sp|Q16937|ASP_ANCCA	203	396	424	32	94	Ancylostoma caninum	CAP	1E-009	SCP	2E-031	SCP	2E-029	SCP 2e-029| SCP_euk 1e-028| SCP_CRISP 3e-018| SCP 2e-015| SCP_GLIPR-1_like 6e-014| SCP_HrTT-1 7e-013| CAP 6e-009| SCP_PR-1_like 1e-007| SCP_GAPR-1_like 1e-005| SCP_PRY1_like 1e-004|	246	1	277
gi|229813288	gi|229813288	Haemonchus contortus	Eukaryota; Metazoa; Nematoda; Chromadorea; Rhabditida; Strongylida; Trichostrongyloidea; Haemonchidae; Haemonchinae; Haemonchus.	M	M	349	transforming growth factor beta-like protein 2	ExpAA=5.31 First60=5.31 PredHel=0 Topology=o	0					SIG	23-24	39.252	5.97	36.717	5.7	RGD_cys disintegrin |	1	transforming growth factor beta-like protein 2	0.0	gi|229813288	711	348	349	100	100	Haemonchus contortus	Dauer larva development regulatory growth factor daf-7	2E-053	sp|P92172|DAF7_CAEEL	209	329	350	35	94	Caenorhabditis elegans	TGFb_propeptide	8E-013	TGFB	2E-023	TGFB	3E-021	TGFB 3e-021| TGFb_propeptide 4e-012| TGF_beta 6e-011| PHA02913 1e-004| PRK07406 | psaA | M1_APN_1 | S1_Rrp4 | ROK | psaA |	24	4	28
gi|256251514	gi|256251514	Angiostrongylus cantonensis	Eukaryota; Metazoa; Nematoda; Chromadorea; Rhabditida; Strongylida; Metastrongyloidea; Angiostrongylidae; Angiostrongylus.	Y	Y	484	hypothetical protein	ExpAA=0.02 First60=0.00 PredHel=0 Topology=o	0					CYT		56.305	8.36			RED_cys disintegrin |	1	hypothetical protein	0.0	gi|256251514	1018	483	484	100	100	Angiostrongylus cantonensis	Carboxypeptidase B	2E-066	sp|P04069|CBPB_ASTFL	253	296	303	40	98	Astacus fluviatilis	Peptidase_M14	7E-084	Zn_pept	7E-096	M14_CP_A-B_like	1E-117	M14_CP_A-B_like e-117| Zn_pept 1e-093| Peptidase_M14 4e-083| M14_CPA_CPB_like 3e-072| M14_CPA 3e-066| M14_CPB2 1e-063| M14_CPB 2e-063| M14_CPO 2e-056| M14_CPT 6e-055| M14_CPA6 6e-053|	247	1	278
gi|256016679	gi|256016679	Angiostrongylus cantonensis	Eukaryota; Metazoa; Nematoda; Chromadorea; Rhabditida; Strongylida; Metastrongyloidea; Angiostrongylidae; Angiostrongylus.	D	D	186	putative EF hand family protein	ExpAA=0.00 First60=0.00 PredHel=0 Topology=o	0					CYT		21.826	4.58			MLD_cys disintegrin |	1	putative EF hand family protein	1E-102	gi|256016679	375	185	186	100	100	Angiostrongylus cantonensis	Serine/threonine-protein phosphatase 2A regulatory subunit B'' subunit alpha	2E-031	sp|Q06190|P2R3A_HUMAN	135	179	1150	38	16	Homo sapiens	Ald_Xan_dh_C2	0.074	EFh	0.29	PTZ00184	0.19	PTZ00184 | Ald_Xan_dh_C2 | EFh | VI_ClpV1 | PRK06464 | lysS_arch | Prominin | PRK07333 | FRQ1 | PEP_synth |	248	1	279
gi|269819658	gi|269819658	Ancylostoma caninum	Eukaryota; Metazoa; Nematoda; Chromadorea; Rhabditida; Strongylida; Ancylostomatoidea; Ancylostomatidae; Ancylostomatinae; Ancylostoma.	M	M	103	nematode anticoagulant protein 7	ExpAA=1.18 First60=1.18 PredHel=0 Topology=o	0					SIG	19-20	11.849	4.69	9.729	4.59	ECD_cys disintegrin |	1	nematode anticoagulant protein 7	1E-058	gi|269819658	229	102	103	100	100	Ancylostoma caninum	Chymotrypsin inhibitor	3E-005	sp|P56682|AMCI_APIME	47	54	56	36	98	Apis mellifera	TIL	2E-005	Sema	0.80	TIL	8E-005	TIL 8e-005| PRK14650 |	1	142	4
gi|83699695	gi|83699695	Haemonchus contortus	Eukaryota; Metazoa; Nematoda; Chromadorea; Rhabditida; Strongylida; Trichostrongyloidea; Haemonchidae; Haemonchinae; Haemonchus.	N	N	954	myosin heavy chain	ExpAA=0.27 First60=0.00 PredHel=0 Topology=o	0					CYT		109.079	7.61			MLD_cys disintegrin |KTS_cys disintegrin |	2	myosin heavy chain	0.0	gi|83699695	1919	953	954	100	100	Haemonchus contortus	Myosin-3	0.0	sp|P12844|MYO3_CAEEL	1580	1364	1969	82	69	Caenorhabditis elegans	Myosin_head	0.0	MYSc	0.0	MYSc_type_II	0.0	MYSc_type_II | Myosin_head | MYSc | COG5022 | MYSc | MYSc_type_V | MYSc_type_I e-171| MYSc_type_XI e-168| MYSc_type_VII e-165| MYSc_type_VIII e-163|	22	4	24
gi|83699693	gi|83699693	Haemonchus contortus	Eukaryota; Metazoa; Nematoda; Chromadorea; Rhabditida; Strongylida; Trichostrongyloidea; Haemonchidae; Haemonchinae; Haemonchus.	G	G	1581	myosin heavy chain	ExpAA=3.02 First60=0.00 PredHel=0 Topology=o	0					CYT		181.92	5.91			MLD_cys disintegrin |KTS_cys disintegrin |	2	myosin heavy chain	0.0	gi|83699693	3094	1580	1581	100	100	Haemonchus contortus	Myosin-3	0.0	sp|Q60LV4|MYO3_CAEBR	2498	1919	1969	79	98	Caenorhabditis briggsae	Myosin_head	0.0	MYSc	0.0	MYSc_type_II	0.0	MYSc_type_II | Myosin_head | MYSc | COG5022 | MYSc | MYSc_type_V e-179| MYSc_type_I e-168| MYSc_type_XI e-163| Myosin_tail_1 e-161| MYSc_type_VII e-160|	22	4	24
gi|145586630	gi|145586630	Ancylostoma ceylanicum	Eukaryota; Metazoa; Nematoda; Chromadorea; Rhabditida; Strongylida; Ancylostomatoidea; Ancylostomatidae; Ancylostomatinae; Ancylostoma.	M	M	190	unnamed protein product	ExpAA=0.09 First60=0.09 PredHel=0 Topology=o	0					SIG	19-20	21.587	4.43	19.68	4.43	KGD_cys disintegrin |	1	anticoagulant protein 7 precursor	3E-045	gi|145666455	185	177	180	51	99	Ancylostoma duodenale	Mucin-19	3E-008	sp|Q6PZE0|MUC19_MOUSE	58.2	163	7524	29	2	Mus musculus	TIL	4E-004	VPS10	0.43	TIL	0.002	TIL 0.002| Tenui_PVC2 | aceK |	1	142	4
gi|3087803	gi|3087803	Haemonchus contortus	Eukaryota; Metazoa; Nematoda; Chromadorea; Rhabditida; Strongylida; Trichostrongyloidea; Haemonchidae; Haemonchinae; Haemonchus.	M	M	325	cysteine protease	ExpAA=0.03 First60=0.00 PredHel=0 Topology=o	0					SIG	18-19	36.059	5.72	33.948	5.53	RTS_cys disintegrin |	1	cysteine protease	0.0	gi|3087803	693	324	325	100	100	Haemonchus contortus	Cathepsin B-like cysteine proteinase 1	1E-107	sp|P25802|CYSP1_OSTOS	387	313	341	59	92	Ostertagia ostertagi	Peptidase_C1	3E-057	Pept_C1	1E-027	Peptidase_C1A_C	7E-081	Peptidase_C1A_CathepsinB 7e-081| Peptidase_C1 2e-056| Peptidase_C1A 2e-034| Pept_C1 1e-025| Peptidase_C1A_CathepsinC 9e-023| Peptidase_C1A_CathepsinX 4e-019| Peptidase_C1 2e-018| PTZ00200 3e-016| PTZ00021 9e-016| PTZ00203 1e-015|	219	2	238
gi|45752338	gi|45752338	Haemonchus contortus	Eukaryota; Metazoa; Nematoda; Chromadorea; Rhabditida; Strongylida; Trichostrongyloidea; Haemonchidae; Haemonchinae; Haemonchus.	M	M	427	aspartyl protease precursor	ExpAA=12.03 First60=9.16 PredHel=0 Topology=o	0					SIG	16-17	47.821	7.43	46.084	7.06	ECD_cys disintegrin |	1	aspartyl protease precursor	0.0	gi|45752338	874	426	427	100	100	Haemonchus contortus	Aspartic protease 6	1E-071	sp|O01530|ASP6_CAEEL	270	383	389	37	99	Caenorhabditis elegans	Asp	1E-057	VWC	0.005	Asp	5E-057	Asp 5e-057| pepsin_like 2e-053| pepsin_A 5e-043| Proteinase_A_fungi 3e-040| phytepsin 5e-039| Cathepsin_D_like 5e-038| Cathepsin_D2 4e-036| renin_like 2e-031| Cathespin_E 5e-031| gastricsin 3e-030|	249	1	280
gi|10803450	gi|10803450	Ostertagia ostertagi	Eukaryota; Metazoa; Nematoda; Chromadorea; Rhabditida; Strongylida; Trichostrongyloidea; Haemonchidae; Ostertagiinae; Ostertagia.	S	S	199	putative cathepsin B.1	ExpAA=0.02 First60=0.02 PredHel=0 Topology=o	0					CYT		21.953	8.39			ECD_cys disintegrin |	1	putative cathepsin B.1	1E-121	gi|10803450	437	198	199	100	100	Ostertagia ostertagi	Cathepsin B-like cysteine proteinase 1	2E-084	sp|P25802|CYSP1_OSTOS	311	186	341	73	55	Ostertagia ostertagi	Peptidase_C1	2E-038	Pept_C1	6E-017	Peptidase_C1A_C	2E-058	Peptidase_C1A_CathepsinB 2e-058| Peptidase_C1 1e-037| Peptidase_C1A 2e-019| Pept_C1 6e-015| Peptidase_C1A_CathepsinX 6e-015| Peptidase_C1A_CathepsinC 2e-012| PTZ00021 5e-011| Peptidase_C1 3e-010| PTZ00200 1e-006| PTZ00049 6e-005|	219	2	238
gi|14278939	gi|14278939	Nippostrongylus brasiliensis	Eukaryota; Metazoa; Nematoda; Chromadorea; Rhabditida; Strongylida; Trichostrongyloidea; Heligmonellidae; Nippostrongylinae; Nippostrongylus.	M	M	144	nippocystatin	ExpAA=9.57 First60=9.54 PredHel=0 Topology=o	0					SIG	26-27	15.822	6.29	13.254	5.92	KGD_cys disintegrin |	1	nippocystatin	9E-078	gi|14278939	292	143	144	100	100	Nippostrongylus brasiliensis	Onchocystatin	2E-013	sp|P22085|CYTX_ONCVO	74.7	105	162	32	65	Onchocerca volvulus	Cystatin	1E-007	CY	1E-017	CY	9E-016	CY 9e-016| CY 2e-014| Cystatin 5e-007| PNPH | PIG-X | PRK15247 | ISP4_OPT | BchZ | PRK12768 | PRK05318 |	34	3	38
[truncated: 23 more columns]

## Sheet: Disintegrin
Seq name and link to fasta sequence	Link to NCBI	Organism	Lineage	First residue	First residue	Seq size	Clustered at 95%-Sim- on 50% of length - - Cluster#	# seqs	Description	TMHMM result	Predicted helices	% membrane	% outside	% inside	Possible GPI?	SigP Result	Cleavage Position	MW	pI	Mature MW	pI	Disintegrin result	Number of domains	Best match to NR protein database	E value	Match	Score	Extent of match	Length of best match	% identity	% Coverage	Species of best match	Best match to SWISSP protein database	E value	Match	Score	Extent of match	Length of best match	% identity	% Coverage	Species of best match	Best match to PFAM database	E value	Best match to SMART database	E value	Best match to CDD database	E value	All CDD domains	Clustered at 25%-Sim- on 50% of length - - Cluster#
Arthropods
Bugs - Cimicomorpha
gi|730939	gi|730939	Rhodnius prolixus	Eukaryota; Metazoa; Arthropoda; Hexapoda; Insecta; Pterygota; Neoptera; Paraneoptera; Hemiptera; Euhemiptera; Heteroptera; Panheteroptera; Cimicomorpha; Reduviidae; Triatominae; Rhodnius.	E	E	103	3	7	Thrombin inhibitor rhodniin	ExpAA=0.00 First60=0.00 PredHel=0 Topology=o	0					CYT		11.114	4.36			ECD_cys disintegrin |	1	Thrombin inhibitor rhodniin gi|1827578|pdb|1TBR|R Chain R, Crystal Structure Of	1E-060	gi|730939	236	102	103	100	100	Rhodnius prolixus	Thrombin inhibitor rhodniin	4E-062	sp|Q06684|THBI_RHOPR	236	102	103	100	100	Rhodnius prolixus	Kazal_2	3E-006	KAZAL	7E-009	KAZAL	6E-007	KAZAL 6e-007| Kazal_2 1e-005| KAZAL_FS 1e-005| Kazal_1 2e-004| KAZAL_PSTI 0.002| oat 0.017| OATP 0.082| PLN00206 | KAZAL_SLC21 | Astro_capsid |	5
gi|1827585	gi|1827585	Rhodnius prolixus	Eukaryota; Metazoa; Arthropoda; Hexapoda; Insecta; Pterygota; Neoptera; Paraneoptera; Hemiptera; Euhemiptera; Heteroptera; Panheteroptera; Cimicomorpha; Reduviidae; Triatominae; Rhodnius.	E	E	103	3	7	Chain S, Crystal Structure Of Insect Derived Double Domain Kazal Inhibitor Rhodniin In Complex With Thrombin	ExpAA=0.00 First60=0.00 PredHel=0 Topology=o	0					CYT		11.1	4.36			ECD_cys disintegrin |	1	Thrombin inhibitor rhodniin gi|1827578|pdb|1TBR|R Chain R, Crystal Structure Of	1E-060	gi|730939	236	102	103	100	100	Rhodnius prolixus	Thrombin inhibitor rhodniin	4E-062	sp|Q06684|THBI_RHOPR	236	102	103	100	100	Rhodnius prolixus	Kazal_2	3E-006	KAZAL	7E-009	KAZAL	6E-007	KAZAL 6e-007| Kazal_2 1e-005| KAZAL_FS 1e-005| Kazal_1 2e-004| KAZAL_PSTI 0.002| oat 0.017| OATP 0.082| PLN00206 | KAZAL_SLC21 | Astro_capsid |	5
gi|1827584	gi|1827584	Rhodnius prolixus	Eukaryota; Metazoa; Arthropoda; Hexapoda; Insecta; Pterygota; Neoptera; Paraneoptera; Hemiptera; Euhemiptera; Heteroptera; Panheteroptera; Cimicomorpha; Reduviidae; Triatominae; Rhodnius.	E	E	103	3	7	Chain R, Crystal Structure Of Insect Derived Double Domain Kazal Inhibitor Rhodniin In Complex With Thrombin	ExpAA=0.00 First60=0.00 PredHel=0 Topology=o	0					CYT		11.09	4.36			ECD_cys disintegrin |	1	Thrombin inhibitor rhodniin gi|1827578|pdb|1TBR|R Chain R, Crystal Structure Of	1E-060	gi|730939	236	102	103	100	100	Rhodnius prolixus	Thrombin inhibitor rhodniin	4E-062	sp|Q06684|THBI_RHOPR	236	102	103	100	100	Rhodnius prolixus	Kazal_2	3E-006	KAZAL	7E-009	KAZAL	6E-007	KAZAL 6e-007| Kazal_2 1e-005| KAZAL_FS 1e-005| Kazal_1 2e-004| KAZAL_PSTI 0.002| oat 0.017| OATP 0.082| PLN00206 | KAZAL_SLC21 | Astro_capsid |	5
gi|1827579	gi|1827579	Rhodnius prolixus	Eukaryota; Metazoa; Arthropoda; Hexapoda; Insecta; Pterygota; Neoptera; Paraneoptera; Hemiptera; Euhemiptera; Heteroptera; Panheteroptera; Cimicomorpha; Reduviidae; Triatominae; Rhodnius.	E	E	103	3	7	Chain S, Crystal Structure Of Insect Derived Double Domain Kazal Inhibitor Rhodniin In Complex With Thrombin	ExpAA=0.00 First60=0.00 PredHel=0 Topology=o	0					CYT		11.09	4.36			ECD_cys disintegrin |	1	Thrombin inhibitor rhodniin gi|1827578|pdb|1TBR|R Chain R, Crystal Structure Of	1E-060	gi|730939	236	102	103	100	100	Rhodnius prolixus	Thrombin inhibitor rhodniin	4E-062	sp|Q06684|THBI_RHOPR	236	102	103	100	100	Rhodnius prolixus	Kazal_2	3E-006	KAZAL	7E-009	KAZAL	6E-007	KAZAL 6e-007| Kazal_2 1e-005| KAZAL_FS 1e-005| Kazal_1 2e-004| KAZAL_PSTI 0.002| oat 0.017| OATP 0.082| PLN00206 | KAZAL_SLC21 | Astro_capsid |	5
gi|1827578	gi|1827578	Rhodnius prolixus	Eukaryota; Metazoa; Arthropoda; Hexapoda; Insecta; Pterygota; Neoptera; Paraneoptera; Hemiptera; Euhemiptera; Heteroptera; Panheteroptera; Cimicomorpha; Reduviidae; Triatominae; Rhodnius.	E	E	103	3	7	Chain R, Crystal Structure Of Insect Derived Double Domain Kazal Inhibitor Rhodniin In Complex With Thrombin	ExpAA=0.00 First60=0.00 PredHel=0 Topology=o	0					CYT		11.09	4.36			ECD_cys disintegrin |	1	Thrombin inhibitor rhodniin gi|1827578|pdb|1TBR|R Chain R, Crystal Structure Of	1E-060	gi|730939	236	102	103	100	100	Rhodnius prolixus	Thrombin inhibitor rhodniin	4E-062	sp|Q06684|THBI_RHOPR	236	102	103	100	100	Rhodnius prolixus	Kazal_2	3E-006	KAZAL	7E-009	KAZAL	6E-007	KAZAL 6e-007| Kazal_2 1e-005| KAZAL_FS 1e-005| Kazal_1 2e-004| KAZAL_PSTI 0.002| oat 0.017| OATP 0.082| PLN00206 | KAZAL_SLC21 | Astro_capsid |	5
gi|1567696	gi|1567696	Rhodnius prolixus	Eukaryota; Metazoa; Arthropoda; Hexapoda; Insecta; Pterygota; Neoptera; Paraneoptera; Hemiptera; Euhemiptera; Heteroptera; Panheteroptera; Cimicomorpha; Reduviidae; Triatominae; Rhodnius.	E	E	103	3	7	thrombin inhibitor protein	ExpAA=0.00 First60=0.00 PredHel=0 Topology=o	0					CYT		11.103	4.36			ECD_cys disintegrin |	1	Thrombin inhibitor rhodniin gi|1827578|pdb|1TBR|R Chain R, Crystal Structure Of	1E-060	gi|730939	236	102	103	100	100	Rhodnius prolixus	Thrombin inhibitor rhodniin	4E-062	sp|Q06684|THBI_RHOPR	236	102	103	100	100	Rhodnius prolixus	Kazal_2	3E-006	KAZAL	7E-009	KAZAL	6E-007	KAZAL 6e-007| Kazal_2 1e-005| KAZAL_FS 1e-005| Kazal_1 2e-004| KAZAL_PSTI 0.002| oat 0.017| OATP 0.082| PLN00206 | KAZAL_SLC21 | Astro_capsid |	5
gi|296313	gi|296313	Rhodnius prolixus	Eukaryota; Metazoa; Arthropoda; Hexapoda; Insecta; Pterygota; Neoptera; Paraneoptera; Hemiptera; Euhemiptera; Heteroptera; Panheteroptera; Cimicomorpha; Reduviidae; Triatominae; Rhodnius.	E	E	103	3	7	thrombininhibitor	ExpAA=0.00 First60=0.00 PredHel=0 Topology=o	0					CYT		11.09	4.36			ECD_cys disintegrin |	1	Thrombin inhibitor rhodniin gi|1827578|pdb|1TBR|R Chain R, Crystal Structure Of	1E-060	gi|730939	236	102	103	100	100	Rhodnius prolixus	Thrombin inhibitor rhodniin	4E-062	sp|Q06684|THBI_RHOPR	236	102	103	100	100	Rhodnius prolixus	Kazal_2	3E-006	KAZAL	7E-009	KAZAL	6E-007	KAZAL 6e-007| Kazal_2 1e-005| KAZAL_FS 1e-005| Kazal_1 2e-004| KAZAL_PSTI 0.002| oat 0.017| OATP 0.082| PLN00206 | KAZAL_SLC21 | Astro_capsid |	5
gi|1567702	gi|1567702	Rhodnius prolixus	Eukaryota; Metazoa; Arthropoda; Hexapoda; Insecta; Pterygota; Neoptera; Paraneoptera; Hemiptera; Euhemiptera; Heteroptera; Panheteroptera; Cimicomorpha; Reduviidae; Triatominae; Rhodnius.	M	M	186	9	3	thrombin inhibitor protein	ExpAA=0.01 First60=0.01 PredHel=0 Topology=o	0					SIG	16-17	20.283	5.05	18.641	4.88	ECD_cys disintegrin |	1	Thrombin inhibitor rhodniin gi|1827578|pdb|1TBR|R Chain R, Crystal Structure Of	5E-058	gi|730939	227	101	103	98	99	Rhodnius prolixus	Thrombin inhibitor rhodniin	3E-059	sp|Q06684|THBI_RHOPR	227	101	103	98	99	Rhodnius prolixus	Kazal_2	7E-007	KAZAL	2E-009	KAZAL	1E-007	KAZAL 1e-007| KAZAL_FS 3e-006| Kazal_2 4e-006| Kazal_1 8e-005| KAZAL_PSTI 0.001| oat 0.054| OATP 0.059| KAZAL_SLC21 | PRK07119 | PLN00206 |	5
gi|1567708	gi|1567708	Rhodnius prolixus	Eukaryota; Metazoa; Arthropoda; Hexapoda; Insecta; Pterygota; Neoptera; Paraneoptera; Hemiptera; Euhemiptera; Heteroptera; Panheteroptera; Cimicomorpha; Reduviidae; Triatominae; Rhodnius.	R	R	184	9	3	thrombin inhibitor protein	ExpAA=0.01 First60=0.01 PredHel=0 Topology=o	0					SIG	14-15	20.165	4.82	18.757	4.75	ECD_cys disintegrin |	1	Thrombin inhibitor rhodniin gi|1827578|pdb|1TBR|R Chain R, Crystal Structure Of	5E-055	gi|730939	217	101	103	93	99	Rhodnius prolixus	Thrombin inhibitor rhodniin	3E-056	sp|Q06684|THBI_RHOPR	217	101	103	93	99	Rhodnius prolixus	Kazal_2	4E-006	KAZAL	2E-009	KAZAL	2E-007	KAZAL 2e-007| KAZAL_FS 3e-006| Kazal_2 2e-005| Kazal_1 9e-005| KAZAL_PSTI 0.001| oat 0.044| OATP | PLN00206 | PHA03322 | PRK07119 |	5
gi|1567700	gi|1567700	Rhodnius prolixus	Eukaryota; Metazoa; Arthropoda; Hexapoda; Insecta; Pterygota; Neoptera; Paraneoptera; Hemiptera; Euhemiptera; Heteroptera; Panheteroptera; Cimicomorpha; Reduviidae; Triatominae; Rhodnius.	R	R	184	9	3	thrombin inhibitor protein	ExpAA=0.01 First60=0.01 PredHel=0 Topology=o	0					SIG	14-15	20.028	4.96	18.641	4.88	ECD_cys disintegrin |	1	Thrombin inhibitor rhodniin gi|1827578|pdb|1TBR|R Chain R, Crystal Structure Of	5E-058	gi|730939	227	101	103	98	99	Rhodnius prolixus	Thrombin inhibitor rhodniin	3E-059	sp|Q06684|THBI_RHOPR	227	101	103	98	99	Rhodnius prolixus	Kazal_2	8E-007	KAZAL	2E-009	KAZAL	2E-007	KAZAL 2e-007| KAZAL_FS 3e-006| Kazal_2 4e-006| Kazal_1 8e-005| KAZAL_PSTI 0.001| oat 0.052| OATP 0.058| KAZAL_SLC21 | PRK07119 | PLN00206 |	5
gi|307094930	gi|307094930	Triatoma matogrossensis	Eukaryota; Metazoa; Arthropoda; Hexapoda; Insecta; Pterygota; Neoptera; Paraneoptera; Hemiptera; Euhemiptera; Heteroptera; Panheteroptera; Cimicomorpha; Reduviidae; Triatominae; Triatoma.	M	M	200	266	2	Tm434 salivary lipocalin	ExpAA=5.71 First60=5.70 PredHel=0 Topology=o	0					SIG	18-19	22.856	8.85	20.936	8.71	VGD_cys disintegrin |	1	Tm434 salivary lipocalin	1E-113	gi|307094930	411	199	200	100	100	Triatoma matogrossensis	Triabin	5E-012	sp|Q27049|TRIA_TRIPA	70.9	152	160	31	96	Triatoma pallidipennis	Triabin	2E-013	CLa	1.2	Triabin	1E-012	Triabin 1e-012| Nitrophorin | Piwi_piwi-like_ProArk | COG2421 | PLN02372 | RT_G2_intron | PTZ00287 | IL15 | wnt | RT_Rtv |	6
gi|307094858	gi|307094858	Triatoma matogrossensis	Eukaryota; Metazoa; Arthropoda; Hexapoda; Insecta; Pterygota; Neoptera; Paraneoptera; Hemiptera; Euhemiptera; Heteroptera; Panheteroptera; Cimicomorpha; Reduviidae; Triatominae; Triatoma.	M	M	200	266	2	salivary lipocalin	ExpAA=5.70 First60=5.70 PredHel=0 Topology=o	0					SIG	18-19	22.829	8.84	20.908	8.7	VGD_cys disintegrin |	1	salivary lipocalin	1E-113	gi|307094858	411	199	200	100	100	Triatoma matogrossensis	Triabin	4E-012	sp|Q27049|TRIA_TRIPA	71.2	152	160	31	96	Triatoma pallidipennis	Triabin	2E-013	CLa	1.1	Triabin	1E-012	Triabin 1e-012| Nitrophorin | Piwi_piwi-like_ProArk | COG2421 | PLN02372 | RT_G2_intron | PTZ00287 | wnt | IL15 | RT_Rtv |	6
gi|307094874	gi|307094874	Triatoma matogrossensis	Eukaryota; Metazoa; Arthropoda; Hexapoda; Insecta; Pterygota; Neoptera; Paraneoptera; Hemiptera; Euhemiptera; Heteroptera; Panheteroptera; Cimicomorpha; Reduviidae; Triatominae; Triatoma.	M	M	188	267	2	salivary lipocalin	ExpAA=10.36 First60=10.35 PredHel=0 Topology=o	0					SIG	20-21	21.438	8.93	19.348	8.82	KGD_cys disintegrin |	1	salivary lipocalin	1E-107	gi|307094874	390	187	188	100	100	Triatoma matogrossensis	Triabin	4E-008	sp|Q27049|TRIA_TRIPA	57.8	149	160	26	94	Triatoma pallidipennis	Triabin	1E-014	HX	3.1	Triabin	7E-014	Triabin 7e-014| EutB | MgsA | Lipocalin | putres_am_tran | PRK15304 | PRK14908 | LIM2_LIMK2 |	6
gi|307094854	gi|307094854	Triatoma matogrossensis	Eukaryota; Metazoa; Arthropoda; Hexapoda; Insecta; Pterygota; Neoptera; Paraneoptera; Hemiptera; Euhemiptera; Heteroptera; Panheteroptera; Cimicomorpha; Reduviidae; Triatominae; Triatoma.	M	M	188	267	2	salivary lipocalin	ExpAA=2.47 First60=2.47 PredHel=0 Topology=o	0					SIG	20-21	21.427	8.81	19.363	8.67	KGD_cys disintegrin |	1	salivary lipocalin	1E-107	gi|307094854	391	187	188	100	100	Triatoma matogrossensis	Triabin	9E-008	sp|Q27049|TRIA_TRIPA	56.6	149	160	26	94	Triatoma pallidipennis	Triabin	8E-015	HX	2.9	Triabin	4E-014	Triabin 4e-014| EutB | Lipocalin | putres_am_tran | MgsA | PRK15304 | PCC | PRK14908 | LIM2_LIMK2 |	6
gi|149898890	gi|149898890	Triatoma infestans	Eukaryota; Metazoa; Arthropoda; Hexapoda; Insecta; Pterygota; Neoptera; Paraneoptera; Hemiptera; Euhemiptera; Heteroptera; Panheteroptera; Cimicomorpha; Reduviidae; Triatominae; Triatoma.	M	M	197	268	2	salivary lipocalin	ExpAA=0.28 First60=0.28 PredHel=0 Topology=o	0					SIG	16-17	23.101	5.22	21.343	5.1	RED_cys disintegrin |	1	salivary lipocalin	1E-115	gi|149898890	418	196	197	100	100	Triatoma infestans	Triabin	4E-005	sp|Q27049|TRIA_TRIPA	48.1	152	160	22	96	Triatoma pallidipennis	Triabin	3E-013	Bac_DnaA_C	0.55	Triabin	1E-012	Triabin 1e-012|	6
gi|149689176	gi|149689176	Triatoma infestans	Eukaryota; Metazoa; Arthropoda; Hexapoda; Insecta; Pterygota; Neoptera; Paraneoptera; Hemiptera; Euhemiptera; Heteroptera; Panheteroptera; Cimicomorpha; Reduviidae; Triatominae; Triatoma.	M	M	197	268	2	salivary lipocalin	ExpAA=0.30 First60=0.30 PredHel=0 Topology=o	0					SIG	16-17	23.029	5.67	21.248	5.49	RED_cys disintegrin |	1	salivary lipocalin	1E-115	gi|149689176	419	196	197	100	100	Triatoma infestans	Procalin	5E-005	sp|Q9U6R6|PRCLN_TRIPT	47.8	167	169	22	99	Triatoma protracta	Triabin	3E-013	Elp3	1.4	Triabin	1E-012	Triabin 1e-012| HSP33 | DUF1212 |	6
gi|270000362	gi|270000362	Adelphocoris lineolatus	Eukaryota; Metazoa; Arthropoda; Hexapoda; Insecta; Pterygota; Neoptera; Paraneoptera; Hemiptera; Euhemiptera; Heteroptera; Panheteroptera; Cimicomorpha; Miridae; Mirini; Adelphocoris.	M	M	138	410	1	odorant-binding protein 2	ExpAA=4.54 First60=4.53 PredHel=0 Topology=o	0					SIG	20-21	15.755	5.08	13.637	4.96	ECD_cys disintegrin |	1	odorant-binding protein 2	4E-077	gi|270000362	290	137	138	100	100	Adelphocoris lineolatus	Pheromone-binding protein-related protein 2	2E-005	sp|P54192|PBP2_DROME	48.1	114	150	24	77	Drosophila melanogaster	PBP_GOBP	2E-007	PhBP	1E-004	PBP_GOBP	9E-007	PBP_GOBP 9e-007| PhBP 0.008| PRK10429 | CAS_CSE1 | rpoC_TIGR | PRK07418 | Abhydrolase_2 | COG2159 | Paramyxo_P | PRK01109 |	242
gi|307095188	gi|307095188	Triatoma matogrossensis	Eukaryota; Metazoa; Arthropoda; Hexapoda; Insecta; Pterygota; Neoptera; Paraneoptera; Hemiptera; Euhemiptera; Heteroptera; Panheteroptera; Cimicomorpha; Reduviidae; Triatominae; Triatoma.	L	L	58	411	1	salivary kazaltype proteinase inhibitor	ExpAA=0.00 First60=0.00 PredHel=0 Topology=o	0					CYT		6.678	9.76			RGD_cys disintegrin |	1	salivary kazaltype proteinase inhibitor	1E-027	gi|307095188	126	57	58	100	100	Triatoma matogrossensis	Enhancer of split M1 protein	0.38	sp|O97176|ESM1_DROME	33.5	53	156	30	35	Drosophila melanogaster	AAA_7	4.8	KAZAL	0.42	cas1_YPEST	2.7	cas1_YPEST | Cas1_I-F |	5
gi|307095044	gi|307095044	Triatoma matogrossensis	Eukaryota; Metazoa; Arthropoda; Hexapoda; Insecta; Pterygota; Neoptera; Paraneoptera; Hemiptera; Euhemiptera; Heteroptera; Panheteroptera; Cimicomorpha; Reduviidae; Triatominae; Triatoma.	M	M	237	412	1	antigen5-like protein precursor	ExpAA=17.57 First60=17.56 PredHel=1 Topology=i5-27o	1	9.3	88.6	2.1		SIG	24-25	27.194	9.48	24.776	9.52	KGD_cys disintegrin |	1	antigen5-like protein precursor	1E-139	gi|307095044	498	236	237	100	100	Triatoma matogrossensis	Venom allergen 5	2E-022	sp|P86870|VA5_VESMG	106	165	202	37	82	Vespa magnifica	CAP	2E-009	SCP	1E-023	SCP_euk	5E-024	SCP_euk 5e-024| SCP 1e-021| SCP_CRISP 1e-013| SCP_GAPR-1_like 1e-013| SCP_GLIPR-1_like 6e-013| SCP_PRY1_like 2e-011| SCP_HrTT-1 6e-010| SCP 3e-009| CAP 9e-009| SCP_PR-1_like 7e-007|	11
gi|307095012	gi|307095012	Triatoma matogrossensis	Eukaryota; Metazoa; Arthropoda; Hexapoda; Insecta; Pterygota; Neoptera; Paraneoptera; Hemiptera; Euhemiptera; Heteroptera; Panheteroptera; Cimicomorpha; Reduviidae; Triatominae; Triatoma.	M	M	87	413	1	salivary kazaltype proteinase inhibitor	ExpAA=7.74 First60=7.74 PredHel=0 Topology=o	0					SIG	26-27	9.721	5.17	6.856	4.64	MLD_cys disintegrin |	1	salivary kazaltype proteinase inhibitor	3E-046	gi|307095012	188	86	87	100	100	Triatoma matogrossensis	Agrin	0.23	sp|O00468|AGRIN_HUMAN	34.3	551	2045	46	27	Homo sapiens	Kazal_2	0.31	KAZAL	0.002	KAZAL_FS	0.058	KAZAL_FS 0.058| KAZAL | oat | Kazal_2 | DUF3418 | caca | PRK07111 | KAZAL_PSTI | cas_HTH | PckA |	5
gi|307095008	gi|307095008	Triatoma matogrossensis	Eukaryota; Metazoa; Arthropoda; Hexapoda; Insecta; Pterygota; Neoptera; Paraneoptera; Hemiptera; Euhemiptera; Heteroptera; Panheteroptera; Cimicomorpha; Reduviidae; Triatominae; Triatoma.	M	M	87	414	1	salivary kazaltype proteinase inhibitor	ExpAA=7.12 First60=7.12 PredHel=0 Topology=o	0					SIG	26-27	9.832	5.31	6.98	4.93	MLD_cys disintegrin |	1	salivary kazaltype proteinase inhibitor	1E-045	gi|307095008	186	86	87	100	100	Triatoma matogrossensis	Enhancer of split M1 protein	0.009	sp|O97176|ESM1_DROME	38.9	131	156	28	85	Drosophila melanogaster	OATP	0.14	KAZAL	8E-004	KAZAL_FS	0.015	KAZAL_FS 0.015| KAZAL 0.085| OATP | Kazal_2 | oat | Kazal_1 | KAZAL_PSTI | PHA02825 | PTZ00303 | PRK07111 |	5
gi|307095000	gi|307095000	Triatoma matogrossensis	Eukaryota; Metazoa; Arthropoda; Hexapoda; Insecta; Pterygota; Neoptera; Paraneoptera; Hemiptera; Euhemiptera; Heteroptera; Panheteroptera; Cimicomorpha; Reduviidae; Triatominae; Triatoma.	M	M	87	415	1	salivary kazaltype proteinase inhibitor	ExpAA=10.71 First60=10.71 PredHel=0 Topology=o	0					SIG	26-27	9.769	5.7	6.902	4.86	MLD_cys disintegrin |	1	salivary kazaltype proteinase inhibitor	4E-046	gi|307095000	187	86	87	100	100	Triatoma matogrossensis	Tomoregulin-2	0.060	sp|Q9QYM9|TEFF2_MOUSE	36.2	46	374	41	13	Mus musculus	DUF2238	0.61	KAZAL	0.001	KAZAL_FS	0.044	KAZAL_FS 0.044| KAZAL | KAZAL_PSTI | PRK09185 | cas_HTH | oat | DUF2238 | COG3975 | Kazal_2 | PHA02825 |	5
gi|307094934	gi|307094934	Triatoma matogrossensis	Eukaryota; Metazoa; Arthropoda; Hexapoda; Insecta; Pterygota; Neoptera; Paraneoptera; Hemiptera; Euhemiptera; Heteroptera; Panheteroptera; Cimicomorpha; Reduviidae; Triatominae; Triatoma.	M	M	189	416	1	salivary lipocalin	ExpAA=10.24 First60=10.23 PredHel=0 Topology=o	0					SIG	20-21	21.419	8.79	19.326	8.66	KGD_cys disintegrin |	1	salivary lipocalin	1E-107	gi|307094934	391	188	189	100	100	Triatoma matogrossensis	Procalin	1E-008	sp|Q9U6R6|PRCLN_TRIPT	59.7	151	169	24	90	Triatoma protracta	Triabin	2E-013	YceI	0.55	Triabin	8E-013	Triabin 8e-013| Lipocalin | PRK06996 | Nitrophorin | LIM2_LIMK2 | PLPDE_III_yhfX_like | TonB-hemlactrns | PLN02966 | Reelin_repeat_2_subrepeat_2 |	6
gi|307094842	gi|307094842	Triatoma matogrossensis	Eukaryota; Metazoa; Arthropoda; Hexapoda; Insecta; Pterygota; Neoptera; Paraneoptera; Hemiptera; Euhemiptera; Heteroptera; Panheteroptera; Cimicomorpha; Reduviidae; Triatominae; Triatoma.	M	M	201	417	1	salivary lipocalin	ExpAA=0.44 First60=0.44 PredHel=0 Topology=o	0					SIG	18-19	22.826	9.06	20.919	8.96	VGD_cys disintegrin |	1	salivary lipocalin	1E-115	gi|307094842	418	200	201	100	100	Triatoma matogrossensis	Triabin	1E-009	sp|Q27049|TRIA_TRIPA	63.2	152	160	26	96	Triatoma pallidipennis	Triabin	8E-013	Sec7	0.66	Triabin	4E-012	Triabin 4e-012| Blc | Nitrophorin | RT_Rtv | Lipocalin | IL15 | Piwi_piwi-like_ProArk | PrmA | RT_G2_intron | DUF1080 |	6
gi|149898801	gi|149898801	Triatoma infestans	Eukaryota; Metazoa; Arthropoda; Hexapoda; Insecta; Pterygota; Neoptera; Paraneoptera; Hemiptera; Euhemiptera; Heteroptera; Panheteroptera; Cimicomorpha; Reduviidae; Triatominae; Triatoma.	M	M	182	418	1	salivary lipocalin	ExpAA=0.29 First60=0.29 PredHel=0 Topology=o	0					SIG	18-19	20.456	8.97	18.571	8.86	VGD_cys disintegrin |	1	salivary lipocalin	1E-103	gi|149898801	379	181	182	100	100	Triatoma infestans	Procalin	2E-010	sp|Q9U6R6|PRCLN_TRIPT	65.1	160	169	28	95	Triatoma protracta	Triabin	7E-019	FBG	2.6	Triabin	3E-018	Triabin 3e-018| Nitrophorin | Orbi_VP3 | PRK05761 | glmM | rbcL | Pox_polyA_pol_C |	6
gi|149898795	gi|149898795	Triatoma infestans	Eukaryota; Metazoa; Arthropoda; Hexapoda; Insecta; Pterygota; Neoptera; Paraneoptera; Hemiptera; Euhemiptera; Heteroptera; Panheteroptera; Cimicomorpha; Reduviidae; Triatominae; Triatoma.	M	M	182	419	1	salivary lipocalin	ExpAA=0.29 First60=0.29 PredHel=0 Topology=o	0					SIG	18-19	20.488	9.1	18.59	9	VGD_cys disintegrin |	1	salivary lipocalin	1E-104	gi|149898795	380	181	182	100	100	Triatoma infestans	Procalin	4E-012	sp|Q9U6R6|PRCLN_TRIPT	70.9	160	169	29	95	Triatoma protracta	Triabin	2E-017	PTBI	3.4	Triabin	8E-017	Triabin 8e-017| Nitrophorin | PRK12418 | MopB_Formate-Dh-H | rbcL |	6
gi|149898787	gi|149898787	Triatoma infestans	Eukaryota; Metazoa; Arthropoda; Hexapoda; Insecta; Pterygota; Neoptera; Paraneoptera; Hemiptera; Euhemiptera; Heteroptera; Panheteroptera; Cimicomorpha; Reduviidae; Triatominae; Triatoma.	M	M	182	420	1	salivary lipocalin	ExpAA=0.31 First60=0.31 PredHel=0 Topology=o	0					SIG	18-19	20.528	9.18	18.622	9.1	VGD_cys disintegrin |	1	salivary lipocalin	1E-103	gi|149898787	376	181	182	100	100	Triatoma infestans	Procalin	4E-010	sp|Q9U6R6|PRCLN_TRIPT	64.3	160	169	28	95	Triatoma protracta	Triabin	4E-017	PKS_KS	1.2	Triabin	2E-016	Triabin 2e-016| PRK05761 | rbcL |	6
gi|149898782	gi|149898782	Triatoma infestans	Eukaryota; Metazoa; Arthropoda; Hexapoda; Insecta; Pterygota; Neoptera; Paraneoptera; Hemiptera; Euhemiptera; Heteroptera; Panheteroptera; Cimicomorpha; Reduviidae; Triatominae; Triatoma.	M	M	182	421	1	salivary lipocalin	ExpAA=0.65 First60=0.65 PredHel=0 Topology=o	0					SIG	18-19	20.438	9.19	18.553	9.11	VGD_cys disintegrin |	1	salivary lipocalin	1E-105	gi|149898782	382	181	182	100	100	Triatoma infestans	Procalin	1E-012	sp|Q9U6R6|PRCLN_TRIPT	72.8	160	169	30	95	Triatoma protracta	Triabin	1E-019	PTBI	2.9	Triabin	6E-019	Triabin 6e-019| Nitrophorin 0.004| PRK05761 | Glycogen_syn | SpoVR | GT1_Glycogen_synthase_GSY2_like | fum_red_Fp | TagB |	6
gi|149689130	gi|149689130	Triatoma infestans	Eukaryota; Metazoa; Arthropoda; Hexapoda; Insecta; Pterygota; Neoptera; Paraneoptera; Hemiptera; Euhemiptera; Heteroptera; Panheteroptera; Cimicomorpha; Reduviidae; Triatominae; Triatoma.	M	M	162	422	1	salivary lipocalin	ExpAA=0.26 First60=0.26 PredHel=0 Topology=o	0					SIG	18-19	18.655	6.16	16.718	6.9	MLD_cys disintegrin |	1	salivary lipocalin	6E-093	gi|149689130	343	161	162	100	100	Triatoma infestans	Triabin	3E-037	sp|Q27049|TRIA_TRIPA	154	159	160	50	100	Triatoma pallidipennis	Triabin	3E-022	TR_FER	0.68	Triabin	1E-021	Triabin 1e-021| Mth212-like_AP-endo 0.087| PBP2_CbbR_RubisCO_like | CobN | PHA02695 | exoDNase_III |	6
gi|149689066	gi|149689066	Triatoma infestans	Eukaryota; Metazoa; Arthropoda; Hexapoda; Insecta; Pterygota; Neoptera; Paraneoptera; Hemiptera; Euhemiptera; Heteroptera; Panheteroptera; Cimicomorpha; Reduviidae; Triatominae; Triatoma.	M	M	206	423	1	salivary lipocalin	ExpAA=10.50 First60=9.70 PredHel=0 Topology=o	0					SIG	18-19	23.75	8.93	21.796	8.81	VGD_cys disintegrin |	1	salivary lipocalin	1E-118	gi|149689066	428	205	206	100	100	Triatoma infestans	Triabin	1E-010	sp|Q27049|TRIA_TRIPA	66.2	146	160	27	92	Triatoma pallidipennis	Triabin	2E-014	Alpha_adaptinC2	0.41	Triabin	1E-013	Triabin 1e-013| TonB-hemin | RhoGAP_fBEM3 | Lipocalin | DUF3852 | wcaI | PHA03136 | PRK14955 |	6
gi|270046248	gi|270046248	Triatoma dimidiata	Eukaryota; Metazoa; Arthropoda; Hexapoda; Insecta; Pterygota; Neoptera; Paraneoptera; Hemiptera; Euhemiptera; Heteroptera; Panheteroptera; Cimicomorpha; Reduviidae; Triatominae; Triatoma.	M	M	230	424	1	unnamed protein product	ExpAA=0.01 First60=0.01 PredHel=0 Topology=o	0					SIG	19-20	26.218	8.11	24.297	8.43	KGD_cys disintegrin |	1	unnamed protein product	1E-135	gi|270046248	484	229	230	100	100	Triatoma dimidiata	Venom allergen 5	1E-026	sp|P35787|VA5_VESVI	119	167	206	38	82	Vespula vidua	CAP	4E-014	SCP	8E-028	SCP_euk	4E-026	SCP_euk 4e-026| SCP 8e-026| SCP_CRISP 1e-017| SCP_HrTT-1 8e-017| SCP_GAPR-1_like 4e-016| SCP_PRY1_like 3e-015| SCP 4e-014| SCP_GLIPR-1_like 5e-014| CAP 2e-013| SCP_PR-1_like 8e-008|	11
gi|270046216	gi|270046216	Triatoma dimidiata	Eukaryota; Metazoa; Arthropoda; Hexapoda; Insecta; Pterygota; Neoptera; Paraneoptera; Hemiptera; Euhemiptera; Heteroptera; Panheteroptera; Cimicomorpha; Reduviidae; Triatominae; Triatoma.	M	M	241	425	1	unnamed protein product	ExpAA=8.66 First60=8.66 PredHel=0 Topology=o	0					SIG	25-26	27.523	9.08	25.022	8.99	KGD_cys disintegrin |	1	unnamed protein product	1E-142	gi|270046216	509	240	241	100	100	Triatoma dimidiata	Venom allergen 5	2E-029	sp|P86870|VA5_VESMG	129	165	202	40	82	Vespa magnifica	CAP	5E-014	SCP	6E-026	SCP_euk	9E-026	SCP_euk 9e-026| SCP 6e-024| SCP_CRISP 6e-017| SCP_HrTT-1 1e-016| SCP_PRY1_like 2e-015| SCP_GLIPR-1_like 4e-014| SCP 6e-014| SCP_GAPR-1_like 2e-013| CAP 3e-013| SCP_PR-1_like 4e-007|	11
gi|83637828	gi|83637828	Triatoma infestans	Eukaryota; Metazoa; Arthropoda; Hexapoda; Insecta; Pterygota; Neoptera; Paraneoptera; Hemiptera; Euhemiptera; Heteroptera; Panheteroptera; Cimicomorpha; Reduviidae; Triatominae; Triatoma.	M	M	409	426	1	infestin 1-7 precursor	ExpAA=0.00 First60=0.00 PredHel=0 Topology=o	0					SIG	17-18	45.004	5.45	43.258	5.39	ECD_cys disintegrin |	1	infestin 1-7 precursor	0.0	gi|83637828	902	408	409	100	100	Triatoma infestans	Serine protease inhibitor dipetalogastin (Fragment)	1E-160	sp|O96790|DPGN_DIPMA	565	339	351	75	97	Dipetalogaster maximus	Kazal_2	9E-007	KAZAL	1E-009	KAZAL	1E-007	KAZAL 1e-007| Kazal_2 5e-006| KAZAL_FS 5e-006| Kazal_1 2e-005| KAZAL_PSTI 3e-004| oat 0.022| OATP 0.100| KAZAL_SLC21 | quino_hemo_SAM | MopB_Phenylacetyl-CoA-OR |	5
gi|14211145	gi|14211145	Triatoma infestans	Eukaryota; Metazoa; Arthropoda; Hexapoda; Insecta; Pterygota; Neoptera; Paraneoptera; Hemiptera; Euhemiptera; Heteroptera; Panheteroptera; Cimicomorpha; Reduviidae; Triatominae; Triatoma.	L	L	222	427	1	thrombin inhibitor infestin precursor	ExpAA=0.00 First60=0.00 PredHel=0 Topology=o	0					CYT		24.399	5.86			ECD_cys disintegrin |	1	thrombin inhibitor infestin precursor	1E-138	gi|14211145	494	221	222	100	100	Triatoma infestans	Serine protease inhibitor dipetalogastin (Fragment)	1E-102	sp|O96790|DPGN_DIPMA	370	337	351	76	96	Dipetalogaster maximus	Kazal_2	7E-007	KAZAL	9E-010	KAZAL	9E-008	KAZAL 9e-008| KAZAL_FS 3e-006| Kazal_2 4e-006| Kazal_1 2e-005| KAZAL_PSTI 7e-004| oat 0.034| OATP 0.047| KAZAL_SLC21 | quino_hemo_SAM | MopB_Phenylacetyl-CoA-OR |	5
gi|115338587	gi|115338587	Triatoma infestans	Eukaryota; Metazoa; Arthropoda; Hexapoda; Insecta; Pterygota; Neoptera; Paraneoptera; Hemiptera; Euhemiptera; Heteroptera; Panheteroptera; Cimicomorpha; Reduviidae; Triatominae; Triatoma.	M	M	139	428	1	lysozyme 2	ExpAA=0.90 First60=0.90 PredHel=0 Topology=o	0					SIG	18-19	15.701	5.61	13.871	5.59	RGD_cys disintegrin |	1	lysozyme 2	3E-080	gi|115338587	301	138	139	100	100	Triatoma infestans	Lysozyme c-1	1E-033	sp|Q17005|LYSC1_ANOGA	141	135	140	45	97	Anopheles gambiae	Lys	2E-026	LYZ1	3E-031	LYZ1	2E-031	LYZ1 2e-031| LYZ1 2e-029| Lys 1e-025| PRK06164 | catalase_fungal | hopene_cyclase | Transglycosylas | KatE | catalase | katE |	243
gi|115392217	gi|115392217	Triatoma brasiliensis	Eukaryota; Metazoa; Arthropoda; Hexapoda; Insecta; Pterygota; Neoptera; Paraneoptera; Hemiptera; Euhemiptera; Heteroptera; Panheteroptera; Cimicomorpha; Reduviidae; Triatominae; Triatoma.	M	M	471	429	1	brasiliensin precursor	ExpAA=0.00 First60=0.00 PredHel=0 Topology=o	0					SIG	17-18	51.873	5.11	50.137	5.07	ECD_cys disintegrin |	1	brasiliensin precursor	0.0	gi|115392217	1039	470	471	100	100	Triatoma brasiliensis	Serine protease inhibitor dipetalogastin (Fragment)	1E-159	sp|O96790|DPGN_DIPMA	563	339	351	75	97	Dipetalogaster maximus	Kazal_2	9E-007	KAZAL	1E-009	KAZAL	1E-007	KAZAL 1e-007| Kazal_2 5e-006| KAZAL_FS 6e-006| Kazal_1 6e-006| KAZAL_PSTI 6e-004| oat 0.037| OATP | KAZAL_SLC21 | PRK07649 |	5
gi|155029178	gi|155029178	Triatoma infestans	Eukaryota; Metazoa; Arthropoda; Hexapoda; Insecta; Pterygota; Neoptera; Paraneoptera; Hemiptera; Euhemiptera; Heteroptera; Panheteroptera; Cimicomorpha; Reduviidae; Triatominae; Triatoma.	M	M	206	430	1	triafestin-2	ExpAA=10.89 First60=9.84 PredHel=0 Topology=o	0					SIG	18-19	23.752	8.93	21.77	8.81	VGD_cys disintegrin |	1	triafestin-2	1E-119	gi|155029178	429	205	206	100	100	Triatoma infestans	Triabin	3E-011	sp|Q27049|TRIA_TRIPA	68.6	146	160	30	92	Triatoma pallidipennis	Triabin	4E-012	ZnF_TTF	4.1	Triabin	2E-011	Triabin 2e-011| PRK10079 | RAG2 | COG4084 | PcnB | Lipocalin | DUF3852 | PTZ00435 | M3A_MIP | TonB-hemin |	6
gi|155029176	gi|155029176	Triatoma infestans	Eukaryota; Metazoa; Arthropoda; Hexapoda; Insecta; Pterygota; Neoptera; Paraneoptera; Hemiptera; Euhemiptera; Heteroptera; Panheteroptera; Cimicomorpha; Reduviidae; Triatominae; Triatoma.	M	M	206	431	1	triafestin-1	ExpAA=15.14 First60=13.61 PredHel=0 Topology=o	0					SIG	18-19	23.78	9.26	21.827	9.2	VGD_cys disintegrin |	1	triafestin-1	1E-118	gi|155029176	428	205	206	100	100	Triatoma infestans	Triabin	4E-010	sp|Q27049|TRIA_TRIPA	64.7	146	160	30	92	Triatoma pallidipennis	Triabin	4E-013	HTH_GNTR	0.38	Triabin	2E-012	Triabin 2e-012| PRK10079 | PRK14055 | addA_alphas | Orn_aminotrans | PRK10906 | COG3593 | TonB-hemin | DUF3852 | PTZ00435 |	6
gi|1567710	gi|1567710	Rhodnius prolixus	Eukaryota; Metazoa; Arthropoda; Hexapoda; Insecta; Pterygota; Neoptera; Paraneoptera; Hemiptera; Euhemiptera; Heteroptera; Panheteroptera; Cimicomorpha; Reduviidae; Triatominae; Rhodnius.	R	R	368	432	1	thrombin inhibitor protein	ExpAA=0.01 First60=0.01 PredHel=0 Topology=o	0					SIG	14-15	40.963	5.5	39.577	5.46	ECD_cys disintegrin |	1	Kazal-type inhibitor	4E-087	gi|295315536	326	409	412	48	100	Panstrongylus megistus	Serine protease inhibitor dipetalogastin (Fragment)	2E-078	sp|O96790|DPGN_DIPMA	292	337	351	45	96	Dipetalogaster maximus	Kazal_2	4E-006	KAZAL	8E-009	KAZAL	1E-006	KAZAL 1e-006| PRK10019 5e-006| KAZAL_FS 2e-005| Kazal_2 2e-005| Kazal_1 2e-004| KAZAL_PSTI 8e-004| SelP_N 0.001| PLN02304 0.001| znuA 0.003| Zip 0.004|	5
gi|1567704	gi|1567704	Rhodnius prolixus	Eukaryota; Metazoa; Arthropoda; Hexapoda; Insecta; Pterygota; Neoptera; Paraneoptera; Hemiptera; Euhemiptera; Heteroptera; Panheteroptera; Cimicomorpha; Reduviidae; Triatominae; Rhodnius.	K	K	129	433	1	thrombin inhibitor protein	ExpAA=0.00 First60=0.00 PredHel=0 Topology=o	0					CYT		14.461	4.64			ECD_cys disintegrin |	1	thrombin inhibitor infestin precursor	3E-030	gi|14211145	135	213	222	52	96	Triatoma infestans	Serine protease inhibitor dipetalogastin (Fragment)	1E-030	sp|O96790|DPGN_DIPMA	131	346	351	53	99	Dipetalogaster maximus	Kazal_2	4E-006	KAZAL	2E-008	KAZAL	2E-006	KAZAL 2e-006| Kazal_2 2e-005| KAZAL_FS 6e-005| Kazal_1 0.001| KAZAL_PSTI 0.002| OATP 0.040| oat | PLN00206 | PRK07119 | Astro_capsid |	5
gi|1567698	gi|1567698	Rhodnius prolixus	Eukaryota; Metazoa; Arthropoda; Hexapoda; Insecta; Pterygota; Neoptera; Paraneoptera; Hemiptera; Euhemiptera; Heteroptera; Panheteroptera; Cimicomorpha; Reduviidae; Triatominae; Rhodnius.	T	T	90	434	1	thrombin inhibitor protein	ExpAA=0.00 First60=0.00 PredHel=0 Topology=o	0					CYT		9.858	4.35			ECD_cys disintegrin |	1	Thrombin inhibitor rhodniin gi|1827578|pdb|1TBR|R Chain R, Crystal Structure Of	2E-037	gi|730939	158	86	103	86	84	Rhodnius prolixus	Thrombin inhibitor rhodniin	8E-039	sp|Q06684|THBI_RHOPR	158	86	103	86	84	Rhodnius prolixus	Kazal_2	3E-006	KAZAL	5E-009	KAZAL	5E-007	KAZAL 5e-007| Kazal_2 1e-005| KAZAL_FS 1e-004| KAZAL_PSTI 0.004| Kazal_1 0.005| OATP 0.011| PLN00206 0.074| oat | Astro_capsid | Glyco_transf_WecG_TagA |	5
Fleas
gi|121511894	gi|121511894	Xenopsylla cheopis	Eukaryota; Metazoa; Arthropoda; Hexapoda; Insecta; Pterygota; Neoptera; Endopterygota; Siphonaptera; Pulicidae; Xenopsyllinae; Xenopsylla.	M	M	104	280	1	putative secreted salivary protein	ExpAA=0.10 First60=0.10 PredHel=0 Topology=o	0					SIG	18-19	11.878	8.34	9.723	8.17	WGD_cys disintegrin |	1	putative secreted salivary protein	3E-059	gi|121511894	231	103	104	100	100	Xenopsylla cheopis	Salivary antigen 1	0.059	sp|Q94424|CTF1_CTEFE	36.2	164	176	27	94	Ctenocephalides felis	DUF477	0.43	SET	4.2	tig	0.72	tig | PRK13515 | ND4 | psbH | rSAM_paired_2 | PRK07121 | Trigger_N | recA |	1
gi|121511886	gi|121511886	Xenopsylla cheopis	Eukaryota; Metazoa; Arthropoda; Hexapoda; Insecta; Pterygota; Neoptera; Endopterygota; Siphonaptera; Pulicidae; Xenopsyllinae; Xenopsylla.	M	M	86	281	1	putative secreted salivary protein	ExpAA=16.30 First60=16.30 PredHel=0 Topology=o	0					SIG	19-20	9.433	6.52	7.243	5.69	VGD_cys disintegrin |	1	putative secreted salivary protein	1E-045	gi|121511886	186	85	86	100	100	Xenopsylla cheopis	Otolith matrix protein 1	4.3	sp|Q0VIL3|OTOMP_DANRE	30	72	371	32	20	Danio rerio	Pilin	1.4	SEA	0.87	PER1	0.016	PER1 0.016| DsrA | STKc_NDR_like | NOC3 | PLN03073 | STKc_NDR2 | Pilin | PRK10504 |	1
gi|121511972	gi|121511972	Xenopsylla cheopis	Eukaryota; Metazoa; Arthropoda; Hexapoda; Insecta; Pterygota; Neoptera; Endopterygota; Siphonaptera; Pulicidae; Xenopsyllinae; Xenopsylla.	M	M	100	279	1	CF salivary antigen 1 precursor-like protein	ExpAA=3.58 First60=3.58 PredHel=0 Topology=o	0					SIG	19-20	11.392	4.66	9.155	4.54	KTS_cys disintegrin |	1	CF salivary antigen 1 precursor-like protein	1E-055	gi|121511972	219	99	100	100	100	Xenopsylla cheopis	Salivary antigen 1	3E-005	sp|Q94424|CTF1_CTEFE	47	167	176	27	95	Ctenocephalides felis	Serinc	0.67	MA	1.6	ileS	0.43	ileS | Serinc | hsdM | PRK13461 | COG3141 | oat | Polyoma_lg_T_C | DUF1193 |	1
gi|262088891	gi|262088891	Ctenocephalides felis	Eukaryota; Metazoa; Arthropoda; Hexapoda; Insecta; Pterygota; Neoptera; Endopterygota; Siphonaptera; Pulicidae; Archaeopsyllinae; Ctenocephalides.	E	E	102	278	1	trypsin	ExpAA=0.00 First60=0.00 PredHel=0 Topology=o	0					CYT		10.985	5.22			KGD_cys disintegrin |	1	trypsin	8E-056	gi|262088891	219	101	102	100	100	Ctenocephalides felis	Plasma kallikrein	2E-013	sp|Q2KJ63|KLKB1_BOVIN	74.3	99	636	41	16	Bos taurus	Trypsin	1E-018	Tryp_SPc	9E-024	Tryp_SPc	9E-022	Tryp_SPc 9e-022| Tryp_SPc 1e-019| Trypsin 7e-018| COG5640 2e-006| APH 0.087| PRK06406 | CBS_pair_16 | PRK06556 | degP_htrA_DO | NrdJ_Z |	7
Flies
gi|302138844	gi|302138844	Tabanus yao	Eukaryota; Metazoa; Arthropoda; Hexapoda; Insecta; Pterygota; Neoptera; Endopterygota; Diptera; Brachycera; Tabanomorpha; Tabanidae; Tabanus.	M	M	255	277	1	tablysin 15	ExpAA=0.29 First60=0.29 PredHel=0 Topology=o	0					SIG		28.22	8.86			RGD_cys disintegrin |	1	tablysin 15	1E-149	gi|302138844	533	254	255	100	100	Tabanus yao	Venom allergen 3	9E-009	sp|P35778|VA3_SOLIN	60.8	227	234	26	97	Solenopsis invicta	CAP	0.034	SCP	2E-009	SCP_euk	5E-016	SCP_euk 5e-016| SCP 2e-007| COG3176 | SCP_GLIPR-1_like | CAP | SCP_HrTT-1 | SCP_CRISP | PRK07922 | quinone_pig3 | ALDH_SaliADH |	11
Ticks - Metastriate
gi|115063	gi|115063	Rhipicephalus microplus	Eukaryota; Metazoa; Arthropoda; Chelicerata; Arachnida; Acari; Parasitiformes; Ixodida; Ixodoidea; Ixodidae; Rhipicephalinae; Rhipicephalus; Boophilus.	M	M	650	2	20	Glycoprotein antigen BM86; AltName: Full=Protective antigen; Flags: Precursor	ExpAA=2.19 First60=0.05 PredHel=0 Topology=o	0					SIG	19-20	71.738	5.58	69.893	5.58	VGD_cys disintegrin |RTS_cys disintegrin |	2	Glycoprotein antigen BM86; AltName: Full=Protective antigen; Flags: Precursor	0.0	gi|115063	1398	649	650	100	100	synthetic construct	Glycoprotein antigen BM86	0.0	sp|P20736|BM86_BOOMI	1398	649	650	100	100	Boophilus microplus	DUF2764	0.32	RPOLA_N	2.8	Baculo_VP91_N	3.2	Baculo_VP91_N | vWA_Matrilin |	3
gi|311902278	gi|311902278	Rhipicephalus microplus	Eukaryota; Metazoa; Arthropoda; Chelicerata; Arachnida; Acari; Parasitiformes; Ixodida; Ixodoidea; Ixodidae; Rhipicephalinae; Rhipicephalus; Boophilus.	M	M	650	2	20	Bm86 glycoprotein	ExpAA=1.60 First60=0.05 PredHel=0 Topology=o	0					SIG	19-20	71.913	5.81	69.969	5.81	VGD_cys disintegrin |RTS_cys disintegrin |	2	Bm86 glycoprotein	0.0	gi|311902278	1397	649	650	100	100	Rhipicephalus microplus	Glycoprotein antigen BM86	0.0	sp|P20736|BM86_BOOMI	1343	649	650	96	100	Boophilus microplus	DUF2764	0.32	RPOLA_N	2.9	PRK11642	1.5	PRK11642 | DUF2764 | vWA_Matrilin |	3
gi|311902276	gi|311902276	Rhipicephalus microplus	Eukaryota; Metazoa; Arthropoda; Chelicerata; Arachnida; Acari; Parasitiformes; Ixodida; Ixodoidea; Ixodidae; Rhipicephalinae; Rhipicephalus; Boophilus.	M	M	650	2	20	Bm86 glycoprotein	ExpAA=3.90 First60=0.05 PredHel=0 Topology=o	0					SIG	19-20	71.867	6.01	69.923	6.02	VGD_cys disintegrin |RTS_cys disintegrin |	2	Bm86 glycoprotein	0.0	gi|311902276	1396	649	650	100	100	Rhipicephalus microplus	Glycoprotein antigen BM86	0.0	sp|P20736|BM86_BOOMI	1349	649	650	96	100	Boophilus microplus	DUF2764	0.31	UAS	2.8	DUF2764	1.7	DUF2764 | Baculo_VP91_N | vWA_Matrilin |	3
gi|311902274	gi|311902274	Rhipicephalus microplus	Eukaryota; Metazoa; Arthropoda; Chelicerata; Arachnida; Acari; Parasitiformes; Ixodida; Ixodoidea; Ixodidae; Rhipicephalinae; Rhipicephalus; Boophilus.	M	M	650	2	20	Bm86 glycoprotein	ExpAA=1.60 First60=0.05 PredHel=0 Topology=o	0					SIG	19-20	71.942	5.56	69.998	5.56	VGD_cys disintegrin |RTS_cys disintegrin |	2	Bm86 glycoprotein	0.0	gi|311902274	1398	649	650	100	100	Rhipicephalus microplus	Glycoprotein antigen BM86	0.0	sp|P20736|BM86_BOOMI	1341	649	650	96	100	Boophilus microplus	DUF2764	0.33	UAS	2.9	PRK11642	1.5	PRK11642 | DUF2764 | Baculo_VP91_N | vWA_Matrilin |	3
gi|311902270	gi|311902270	Rhipicephalus microplus	Eukaryota; Metazoa; Arthropoda; Chelicerata; Arachnida; Acari; Parasitiformes; Ixodida; Ixodoidea; Ixodidae; Rhipicephalinae; Rhipicephalus; Boophilus.	M	M	650	2	20	Bm86 glycoprotein	ExpAA=2.19 First60=0.05 PredHel=0 Topology=o	0					SIG	19-20	71.884	5.81	69.94	5.81	VGD_cys disintegrin |RTS_cys disintegrin |	2	Bm86 glycoprotein	0.0	gi|311902270	1396	649	650	100	100	Rhipicephalus microplus	Glycoprotein antigen BM86	0.0	sp|P20736|BM86_BOOMI	1354	649	650	97	100	Boophilus microplus	DUF2764	0.32	UAS	2.8	PRK11642	2.4	PRK11642 | PTZ00270 | Baculo_VP91_N |	3
gi|311902268	gi|311902268	Rhipicephalus microplus	Eukaryota; Metazoa; Arthropoda; Chelicerata; Arachnida; Acari; Parasitiformes; Ixodida; Ixodoidea; Ixodidae; Rhipicephalinae; Rhipicephalus; Boophilus.	M	M	650	2	20	Bm86 glycoprotein	ExpAA=2.19 First60=0.05 PredHel=0 Topology=o	0					SIG	19-20	71.853	5.9	69.909	5.9	VGD_cys disintegrin |RTS_cys disintegrin |	2	Bm86 glycoprotein	0.0	gi|311902268	1397	649	650	100	100	Rhipicephalus microplus	Glycoprotein antigen BM86	0.0	sp|P20736|BM86_BOOMI	1350	649	650	96	100	Boophilus microplus	DUF2764	0.31	UAS	2.8	DUF2764	1.7	DUF2764 | PTZ00270 | Baculo_VP91_N | vWA_Matrilin |	3
gi|311902266	gi|311902266	Rhipicephalus microplus	Eukaryota; Metazoa; Arthropoda; Chelicerata; Arachnida; Acari; Parasitiformes; Ixodida; Ixodoidea; Ixodidae; Rhipicephalinae; Rhipicephalus; Boophilus.	M	M	650	2	20	Bm86 glycoprotein	ExpAA=3.90 First60=0.05 PredHel=0 Topology=o	0					SIG	19-20	71.882	5.81	69.938	5.81	VGD_cys disintegrin |RTS_cys disintegrin |	2	Bm86 glycoprotein	0.0	gi|311902266	1397	649	650	100	100	Rhipicephalus microplus	Glycoprotein antigen BM86	0.0	sp|P20736|BM86_BOOMI	1349	649	650	96	100	Boophilus microplus	DUF2764	0.32	UAS	2.8	PRK11642	2.3	PRK11642 | Baculo_VP91_N | vWA_Matrilin | PTZ00270 |	3
gi|311902264	gi|311902264	Rhipicephalus microplus	Eukaryota; Metazoa; Arthropoda; Chelicerata; Arachnida; Acari; Parasitiformes; Ixodida; Ixodoidea; Ixodidae; Rhipicephalinae; Rhipicephalus; Boophilus.	M	M	650	2	20	Bm86 glycoprotein	ExpAA=2.19 First60=0.05 PredHel=0 Topology=o	0					SIG	19-20	71.854	5.81	69.91	5.81	VGD_cys disintegrin |RTS_cys disintegrin |	2	Bm86 glycoprotein	0.0	gi|311902264	1397	649	650	100	100	Rhipicephalus microplus	Glycoprotein antigen BM86	0.0	sp|P20736|BM86_BOOMI	1351	649	650	96	100	Boophilus microplus	DUF2764	0.32	UAS	2.8	PRK11642	2.3	PRK11642 | PTZ00270 | Baculo_VP91_N | vWA_Matrilin |	3
gi|311902262	gi|311902262	Rhipicephalus microplus	Eukaryota; Metazoa; Arthropoda; Chelicerata; Arachnida; Acari; Parasitiformes; Ixodida; Ixodoidea; Ixodidae; Rhipicephalinae; Rhipicephalus; Boophilus.	M	M	650	2	20	Bm86 glycoprotein	ExpAA=3.90 First60=0.05 PredHel=0 Topology=o	0					SIG	19-20	71.895	6.01	69.951	6.02	VGD_cys disintegrin |RTS_cys disintegrin |	2	Bm86 glycoprotein	0.0	gi|311902258	1396	649	650	100	100	Rhipicephalus microplus	Glycoprotein antigen BM86	0.0	sp|P20736|BM86_BOOMI	1350	649	650	96	100	Boophilus microplus	DUF2764	0.31	UAS	2.8	DUF2764	1.7	DUF2764 | Baculo_VP91_N | vWA_Matrilin |	3
gi|311902260	gi|311902260	Rhipicephalus microplus	Eukaryota; Metazoa; Arthropoda; Chelicerata; Arachnida; Acari; Parasitiformes; Ixodida; Ixodoidea; Ixodidae; Rhipicephalinae; Rhipicephalus; Boophilus.	M	M	650	2	20	Bm86 glycoprotein	ExpAA=3.90 First60=0.05 PredHel=0 Topology=o	0					SIG	19-20	71.895	6.01	69.951	6.02	VGD_cys disintegrin |RTS_cys disintegrin |	2	Bm86 glycoprotein	0.0	gi|311902258	1396	649	650	100	100	Rhipicephalus microplus	Glycoprotein antigen BM86	0.0	sp|P20736|BM86_BOOMI	1350	649	650	96	100	Boophilus microplus	DUF2764	0.31	UAS	2.8	DUF2764	1.7	DUF2764 | Baculo_VP91_N | vWA_Matrilin |	3
gi|311902258	gi|311902258	Rhipicephalus microplus	Eukaryota; Metazoa; Arthropoda; Chelicerata; Arachnida; Acari; Parasitiformes; Ixodida; Ixodoidea; Ixodidae; Rhipicephalinae; Rhipicephalus; Boophilus.	M	M	650	2	20	Bm86 glycoprotein	ExpAA=3.90 First60=0.05 PredHel=0 Topology=o	0					SIG	19-20	71.895	6.01	69.951	6.02	VGD_cys disintegrin |RTS_cys disintegrin |	2	Bm86 glycoprotein	0.0	gi|311902258	1396	649	650	100	100	Rhipicephalus microplus	Glycoprotein antigen BM86	0.0	sp|P20736|BM86_BOOMI	1350	649	650	96	100	Boophilus microplus	DUF2764	0.31	UAS	2.8	DUF2764	1.7	DUF2764 | Baculo_VP91_N | vWA_Matrilin |	3
gi|311902256	gi|311902256	Rhipicephalus microplus	Eukaryota; Metazoa; Arthropoda; Chelicerata; Arachnida; Acari; Parasitiformes; Ixodida; Ixodoidea; Ixodidae; Rhipicephalinae; Rhipicephalus; Boophilus.	M	M	650	2	20	Bm86 glycoprotein	ExpAA=1.60 First60=0.05 PredHel=0 Topology=o	0					SIG	19-20	71.928	5.72	69.984	5.72	VGD_cys disintegrin |RTS_cys disintegrin |	2	Bm86 glycoprotein	0.0	gi|311902252	1397	649	650	100	100	Rhipicephalus microplus	Glycoprotein antigen BM86	0.0	sp|P20736|BM86_BOOMI	1345	649	650	96	100	Boophilus microplus	DUF2764	0.33	UAS	2.9	PRK11642	1.5	PRK11642 | Baculo_VP91_N | vWA_Matrilin | PTZ00270 |	3
gi|311902254	gi|311902254	Rhipicephalus microplus	Eukaryota; Metazoa; Arthropoda; Chelicerata; Arachnida; Acari; Parasitiformes; Ixodida; Ixodoidea; Ixodidae; Rhipicephalinae; Rhipicephalus; Boophilus.	M	M	650	2	20	Bm86 glycoprotein	ExpAA=1.60 First60=0.05 PredHel=0 Topology=o	0					SIG	19-20	71.928	5.72	69.984	5.72	VGD_cys disintegrin |RTS_cys disintegrin |	2	Bm86 glycoprotein	0.0	gi|311902252	1397	649	650	100	100	Rhipicephalus microplus	Glycoprotein antigen BM86	0.0	sp|P20736|BM86_BOOMI	1345	649	650	96	100	Boophilus microplus	DUF2764	0.33	UAS	2.9	PRK11642	1.5	PRK11642 | Baculo_VP91_N | vWA_Matrilin | PTZ00270 |	3
gi|311902252	gi|311902252	Rhipicephalus microplus	Eukaryota; Metazoa; Arthropoda; Chelicerata; Arachnida; Acari; Parasitiformes; Ixodida; Ixodoidea; Ixodidae; Rhipicephalinae; Rhipicephalus; Boophilus.	M	M	650	2	20	Bm86 glycoprotein	ExpAA=1.60 First60=0.05 PredHel=0 Topology=o	0					SIG	19-20	71.928	5.72	69.984	5.72	VGD_cys disintegrin |RTS_cys disintegrin |	2	Bm86 glycoprotein	0.0	gi|311902252	1397	649	650	100	100	Rhipicephalus microplus	Glycoprotein antigen BM86	0.0	sp|P20736|BM86_BOOMI	1345	649	650	96	100	Boophilus microplus	DUF2764	0.33	UAS	2.9	PRK11642	1.5	PRK11642 | Baculo_VP91_N | vWA_Matrilin | PTZ00270 |	3
gi|161668	gi|161668	Rhipicephalus microplus	Eukaryota; Metazoa; Arthropoda; Chelicerata; Arachnida; Acari; Parasitiformes; Ixodida; Ixodoidea; Ixodidae; Rhipicephalinae; Rhipicephalus; Boophilus.	M	M	650	2	20	cell surface glycoprotein BM86 precursor	ExpAA=2.19 First60=0.05 PredHel=0 Topology=o	0					SIG	19-20	71.789	5.58	69.893	5.58	VGD_cys disintegrin |RTS_cys disintegrin |	2	Glycoprotein antigen BM86; AltName: Full=Protective antigen; Flags: Precursor	0.0	gi|115063	1398	649	650	100	100	synthetic construct	Glycoprotein antigen BM86	0.0	sp|P20736|BM86_BOOMI	1398	649	650	100	100	Boophilus microplus	DUF2764	0.32	RPOLA_N	2.8	Baculo_VP91_N	3.2	Baculo_VP91_N | vWA_Matrilin |	3
gi|219553156	gi|219553156	Rhipicephalus annulatus	Eukaryota; Metazoa; Arthropoda; Chelicerata; Arachnida; Acari; Parasitiformes; Ixodida; Ixodoidea; Ixodidae; Rhipicephalinae; Rhipicephalus; Boophilus.	M	M	648	2	20	Bm86-like protein	ExpAA=2.43 First60=0.04 PredHel=0 Topology=o	0					SIG	19-20	71.749	5.74	69.897	5.74	VGD_cys disintegrin |RTS_cys disintegrin |	2	Bm86-like protein	0.0	gi|219553156	1399	647	648	100	100	Rhipicephalus annulatus	Glycoprotein antigen BM86	0.0	sp|P20736|BM86_BOOMI	1319	649	650	94	100	Boophilus microplus	DUF2764	0.28	EGF_CA	0.71	vWA_Matrilin	0.29	vWA_Matrilin | DUF2764 | Baculo_VP91_N | cEGF | PTZ00270 |	3
gi|311902272	gi|311902272	Rhipicephalus microplus	Eukaryota; Metazoa; Arthropoda; Chelicerata; Arachnida; Acari; Parasitiformes; Ixodida; Ixodoidea; Ixodidae; Rhipicephalinae; Rhipicephalus; Boophilus.	M	M	648	2	20	Bm86 glycoprotein	ExpAA=2.19 First60=0.05 PredHel=0 Topology=o	0					SIG	19-20	71.708	5.74	69.763	5.74	VGD_cys disintegrin |RTS_cys disintegrin |	2	Bm86 glycoprotein	0.0	gi|311902272	1401	647	648	100	100	Rhipicephalus microplus	Glycoprotein antigen BM86	0.0	sp|P20736|BM86_BOOMI	1314	649	650	94	100	Boophilus microplus	DUF2764	0.26	EGF_CA	0.85	vWA_Matrilin	0.33	vWA_Matrilin | DUF2764 | PRK11642 | PTZ00270 | Baculo_VP91_N | cEGF |	3
gi|311902284	gi|311902284	Rhipicephalus annulatus	Eukaryota; Metazoa; Arthropoda; Chelicerata; Arachnida; Acari; Parasitiformes; Ixodida; Ixodoidea; Ixodidae; Rhipicephalinae; Rhipicephalus; Boophilus.	M	M	647	2	20	Bm86 glycoprotein	ExpAA=2.43 First60=0.05 PredHel=0 Topology=o	0					SIG	19-20	71.539	5.86	69.627	5.86	VGD_cys disintegrin |RTS_cys disintegrin |	2	Bm86 glycoprotein	0.0	gi|311902284	1397	646	647	100	100	Rhipicephalus annulatus	Glycoprotein antigen BM86	0.0	sp|P20736|BM86_BOOMI	1297	647	650	93	100	Boophilus microplus	DUF2764	0.25	EGF_CA	0.87	vWA_Matrilin	0.33	vWA_Matrilin | DUF2764 | PTZ00270 | PRK11642 | Baculo_VP91_N | cEGF |	3
gi|311902282	gi|311902282	Rhipicephalus annulatus	Eukaryota; Metazoa; Arthropoda; Chelicerata; Arachnida; Acari; Parasitiformes; Ixodida; Ixodoidea; Ixodidae; Rhipicephalinae; Rhipicephalus; Boophilus.	M	M	647	2	20	Bm86 glycoprotein	ExpAA=1.35 First60=0.05 PredHel=0 Topology=o	0					SIG	19-20	71.573	5.62	69.629	5.62	VGD_cys disintegrin |RTS_cys disintegrin |	2	Bm86 glycoprotein	0.0	gi|311902280	1397	646	647	100	100	Rhipicephalus annulatus	Glycoprotein antigen BM86	0.0	sp|P20736|BM86_BOOMI	1297	647	650	93	100	Boophilus microplus	DUF2764	0.26	EGF_CA	0.87	vWA_Matrilin	0.33	vWA_Matrilin | DUF2764 | PTZ00270 | Baculo_VP91_N | cEGF |	3
gi|311902280	gi|311902280	Rhipicephalus annulatus	Eukaryota; Metazoa; Arthropoda; Chelicerata; Arachnida; Acari; Parasitiformes; Ixodida; Ixodoidea; Ixodidae; Rhipicephalinae; Rhipicephalus; Boophilus.	M	M	647	2	20	Bm86 glycoprotein	ExpAA=1.35 First60=0.05 PredHel=0 Topology=o	0					SIG	19-20	71.573	5.62	69.629	5.62	VGD_cys disintegrin |RTS_cys disintegrin |	2	Bm86 glycoprotein	0.0	gi|311902280	1397	646	647	100	100	Rhipicephalus annulatus	Glycoprotein antigen BM86	0.0	sp|P20736|BM86_BOOMI	1297	647	650	93	100	Boophilus microplus	DUF2764	0.26	EGF_CA	0.87	vWA_Matrilin	0.33	vWA_Matrilin | DUF2764 | PTZ00270 | Baculo_VP91_N | cEGF |	3
gi|209418824	gi|209418824	Dermacentor reticulatus	Eukaryota; Metazoa; Arthropoda; Chelicerata; Arachnida; Acari; Parasitiformes; Ixodida; Ixodoidea; Ixodidae; Rhipicephalinae; Dermacentor.	M	M	168	5	4	complement inhibitor	ExpAA=0.01 First60=0.01 PredHel=0 Topology=o	0					SIG	18-19	18.625	4.55	16.726	4.55	MLD_cys disintegrin |	1	complement inhibitor	7E-094	gi|209418824	346	167	168	100	100	Dermacentor reticulatus	Moubatin	1E-039	sp|Q04669|MOUB_ORNMO	162	162	171	49	95	Ornithodoros moubata	CHRD	4.2	CBD_II	0.27	PRK01637	5.6	PRK01637 |	4
gi|253559376	gi|253559376	Hyalomma anatolicum anatolicum	Eukaryota; Metazoa; Arthropoda; Chelicerata; Arachnida; Acari; Parasitiformes; Ixodida; Ixodoidea; Ixodidae; Hyalomminae; Hyalomma.	M	M	664	6	3	HA03-2 protein variant	ExpAA=16.41 First60=14.71 PredHel=0 Topology=o	0					SIG	24-25	71.915	6.65	69.524	6.69	VGD_cys disintegrin |	1	HA03-2 protein variant	0.0	gi|253559376	1423	663	664	100	100	Hyalomma anatolicum anatolicum	Glycoprotein antigen BM86	0.0	sp|P20736|BM86_BOOMI	915	642	650	64	99	Boophilus microplus	ASC	0.31	Zn_dep_PLPC	1.8	gltX	0.29	gltX | PHA03295 | Clp_protease_NfeD_1 | ASC | FliC | cEGF | PHA03073 |	3
gi|253559374	gi|253559374	Hyalomma anatolicum anatolicum	Eukaryota; Metazoa; Arthropoda; Chelicerata; Arachnida; Acari; Parasitiformes; Ixodida; Ixodoidea; Ixodidae; Hyalomminae; Hyalomma.	M	M	664	6	3	HA03-1 protein variant	ExpAA=16.41 First60=14.71 PredHel=0 Topology=o	0					SIG	24-25	71.952	6.65	69.537	6.69	VGD_cys disintegrin |	1	HA03-1 protein variant	0.0	gi|253559374	1423	663	664	100	100	Hyalomma anatolicum anatolicum	Glycoprotein antigen BM86	0.0	sp|P20736|BM86_BOOMI	915	642	650	64	99	Boophilus microplus	ASC	0.31	Zn_dep_PLPC	1.8	gltX	0.29	gltX | PHA03295 | Clp_protease_NfeD_1 | ASC | FliC | cEGF | PHA03073 |	3
gi|204306100	gi|204306100	Hyalomma anatolicum anatolicum	Eukaryota; Metazoa; Arthropoda; Chelicerata; Arachnida; Acari; Parasitiformes; Ixodida; Ixodoidea; Ixodidae; Hyalomminae; Hyalomma.	M	M	664	6	3	HA03 protein	ExpAA=16.41 First60=14.71 PredHel=0 Topology=o	0					SIG	24-25	71.948	6.45	69.595	6.47	VGD_cys disintegrin |	1	HA03 protein	0.0	gi|204306100	1424	663	664	100	100	Hyalomma anatolicum anatolicum	Glycoprotein antigen BM86	0.0	sp|P20736|BM86_BOOMI	916	642	650	64	99	Boophilus microplus	ASC	0.32	Zn_dep_PLPC	1.8	gltX	0.29	gltX | PHA03295 | Clp_protease_NfeD_1 | ASC | FliC | cEGF | PHA03073 |	3
gi|74813139	gi|74813139	Rhipicephalus microplus	Eukaryota; Metazoa; Arthropoda; Chelicerata; Arachnida; Acari; Parasitiformes; Ixodida; Ixodoidea; Ixodidae; Rhipicephalinae; Rhipicephalus; Boophilus.	M	M	110	16	2	Antimicrobial peptide microplusin; Short=Microplusin; Flags: Precursor	ExpAA=1.31 First60=1.31 PredHel=0 Topology=o	0					SIG	20-21	12.187	5.34	10.22	5.16	KGD_cys disintegrin |	1	Antimicrobial peptide microplusin; Short=Microplusin; Flags: Precursor	8E-058	gi|74813139	226	109	110	100	100	Rhipicephalus microplus	Antimicrobial peptide microplusin	3E-059	sp|Q86LE5|MPSIN_BOOMI	226	109	110	100	100	Boophilus microplus	Usher	0.65	TLDc	0.79	RT_ZFREV_like	0.14	RT_ZFREV_like | PRK12389 | PRK15054 | TOS9 | PRK14844 | PRK13628 | Usher | PRK10959 | PRK10772 | dinG |	26
gi|28864185	gi|28864185	Rhipicephalus microplus	Eukaryota; Metazoa; Arthropoda; Chelicerata; Arachnida; Acari; Parasitiformes; Ixodida; Ixodoidea; Ixodidae; Rhipicephalinae; Rhipicephalus; Boophilus.	M	M	110	16	2	microplusin preprotein	ExpAA=1.31 First60=1.31 PredHel=0 Topology=o	0					SIG	20-21	12.188	5.34	10.22	5.16	KGD_cys disintegrin |	1	Antimicrobial peptide microplusin; Short=Microplusin; Flags: Precursor	8E-058	gi|74813139	226	109	110	100	100	Rhipicephalus microplus	Antimicrobial peptide microplusin	3E-059	sp|Q86LE5|MPSIN_BOOMI	226	109	110	100	100	Boophilus microplus	Usher	0.65	TLDc	0.79	RT_ZFREV_like	0.14	RT_ZFREV_like | PRK12389 | PRK15054 | TOS9 | PRK14844 | PRK13628 | Usher | PRK10959 | PRK10772 | dinG |	26
gi|281188146	gi|281188146	Rhipicephalus appendiculatus	Eukaryota; Metazoa; Arthropoda; Chelicerata; Arachnida; Acari; Parasitiformes; Ixodida; Ixodoidea; Ixodidae; Rhipicephalinae; Rhipicephalus; Rhipicephalus.	M	M	693	17	2	gut cell surface glycoprotein	ExpAA=13.26 First60=0.37 PredHel=0 Topology=o	0					SIG	19-20	75.957	5.79	74.103	5.71	VGD_cys disintegrin |KTS_cys disintegrin |	2	gut cell surface glycoprotein	0.0	gi|281188146	1483	692	693	100	100	Rhipicephalus appendiculatus	Glycoprotein antigen BM86	0.0	sp|P20736|BM86_BOOMI	1055	647	650	70	100	Boophilus microplus	DUF1229	0.021	DAGKa	4.9	vWA_Matrilin	0.015	vWA_Matrilin 0.015| DUF1229 | LCD1 | DUF2764 |	3
gi|281188144	gi|281188144	Rhipicephalus appendiculatus	Eukaryota; Metazoa; Arthropoda; Chelicerata; Arachnida; Acari; Parasitiformes; Ixodida; Ixodoidea; Ixodidae; Rhipicephalinae; Rhipicephalus; Rhipicephalus.	M	M	693	17	2	gut cell surface glycoprotein	ExpAA=13.26 First60=0.37 PredHel=0 Topology=o	0					SIG	19-20	76.102	6.09	74.244	5.99	VGD_cys disintegrin |KTS_cys disintegrin |	2	gut cell surface glycoprotein	0.0	gi|281188144	1483	692	693	100	100	Rhipicephalus appendiculatus	Glycoprotein antigen BM86	0.0	sp|P20736|BM86_BOOMI	1055	647	650	70	100	Boophilus microplus	DUF1229	0.020	DAGKa	5.9	vWA_Matrilin	0.019	vWA_Matrilin 0.019| DUF1229 | LCD1 | DUF2764 | VESA1_N |	3
gi|17154958	gi|17154958	Hyalomma anatolicum anatolicum	Eukaryota; Metazoa; Arthropoda; Chelicerata; Arachnida; Acari; Parasitiformes; Ixodida; Ixodoidea; Ixodidae; Hyalomminae; Hyalomma.	M	M	664	18	2	BM86-like protein	ExpAA=5.79 First60=4.12 PredHel=0 Topology=o	0					SIG	24-25	72.4	5.74	70.049	5.66	VGD_cys disintegrin |RED_cys disintegrin |	2	BM86-like protein	0.0	gi|17154958	1432	663	664	100	100	Hyalomma anatolicum anatolicum	Glycoprotein antigen BM86	0.0	sp|P20736|BM86_BOOMI	929	644	650	64	99	Boophilus microplus	His_Phos_2	0.006	Sema	0.64	His_Phos_2	0.033	His_Phos_2 0.033| gltX | Clp_protease_NfeD_1 | toxin_SdpC | vWA_Matrilin | ASC | cEGF | PHA03069 | Dynactin_p62 |	3
gi|187710952	gi|187710952	Hyalomma anatolicum anatolicum	Eukaryota; Metazoa; Arthropoda; Chelicerata; Arachnida; Acari; Parasitiformes; Ixodida; Ixodoidea; Ixodidae; Hyalomminae; Hyalomma.	L	L	657	18	2	HA86-like protein	ExpAA=0.66 First60=0.04 PredHel=0 Topology=o	0					SIG	19-20	71.747	5.66	69.904	5.58	VGD_cys disintegrin |RED_cys disintegrin |	2	HA86-like protein	0.0	gi|187710952	1417	656	657	100	100	Hyalomma anatolicum anatolicum	Glycoprotein antigen BM86	0.0	sp|P20736|BM86_BOOMI	930	640	650	64	99	Boophilus microplus	His_Phos_2	0.065	Sema	0.64	gltX	0.35	gltX | His_Phos_2 | vWA_Matrilin | ASC | cEGF | PHA03069 | PRK09709 |	3
gi|306415515	gi|306415515	Rhipicephalus microplus	Eukaryota; Metazoa; Arthropoda; Chelicerata; Arachnida; Acari; Parasitiformes; Ixodida; Ixodoidea; Ixodidae; Rhipicephalinae; Rhipicephalus; Boophilus.	M	M	569	21	2	BM protein	ExpAA=0.10 First60=0.10 PredHel=0 Topology=o	0					SIG	19-20	63.606	6.27	61.71	6.28	VGD_cys disintegrin |RTS_cys disintegrin |	2	BM protein	0.0	gi|306415515	1243	568	569	100	100	Rhipicephalus microplus	Glycoprotein antigen BM86	0.0	sp|P20736|BM86_BOOMI	1203	600	650	97	92	Boophilus microplus	DUF2764	0.26	LCCL	3.2	DUF2764	1.4	DUF2764 | PRK05341 | vWA_Matrilin | Baculo_VP91_N |	3
gi|34500282	gi|34500282	Rhipicephalus microplus	Eukaryota; Metazoa; Arthropoda; Chelicerata; Arachnida; Acari; Parasitiformes; Ixodida; Ixodoidea; Ixodidae; Rhipicephalinae; Rhipicephalus; Boophilus.	M	M	569	21	2	Bm95 protein	ExpAA=0.05 First60=0.05 PredHel=0 Topology=o	0					SIG	19-20	63.744	6.44	61.882	6.47	VGD_cys disintegrin |RTS_cys disintegrin |	2	Bm95 protein	0.0	gi|34500282	1239	568	569	100	100	Rhipicephalus microplus	Glycoprotein antigen BM86	0.0	sp|P20736|BM86_BOOMI	1194	600	650	96	92	Boophilus microplus	DUF2764	0.30	UAS	2.7	rpoB	0.39	rpoB | DUF2764 | vWA_Matrilin | Baculo_VP91_N |	3
gi|27466898	gi|27466898	Dermacentor andersoni	Eukaryota; Metazoa; Arthropoda; Chelicerata; Arachnida; Acari; Parasitiformes; Ixodida; Ixodoidea; Ixodidae; Rhipicephalinae; Dermacentor.	M	M	375	22	2	factor D-like protein	ExpAA=0.13 First60=0.13 PredHel=0 Topology=o	0					SIG	18-19	41.083	5.06	39.21	5.06	KGD_cys disintegrin |	1	factor D-like protein	0.0	gi|27466898	795	374	375	100	100	Dermacentor andersoni	Serine proteinase stubble	4E-045	sp|Q05319|STUB_DROME	182	254	787	35	32	Drosophila melanogaster	Trypsin	2E-044	Tryp_SPc	3E-064	Tryp_SPc	3E-062	Tryp_SPc 3e-062| Tryp_SPc 6e-059| Trypsin 1e-043| COG5640 1e-026| COG3591 | PTZ00303 | PRK15204 | Neogenin_C | MMS21 | WbaP_sugtrans |	7
gi|26420454	gi|26420454	Dermacentor variabilis	Eukaryota; Metazoa; Arthropoda; Chelicerata; Arachnida; Acari; Parasitiformes; Ixodida; Ixodoidea; Ixodidae; Rhipicephalinae; Dermacentor.	M	M	374	22	2	factor D-like protein	ExpAA=0.06 First60=0.05 PredHel=0 Topology=o	0					SIG	18-19	40.898	5.07	39.088	5.07	KGD_cys disintegrin |	1	factor D-like protein	0.0	gi|26420454	792	373	374	100	100	Dermacentor variabilis	Serine proteinase stubble	4E-045	sp|Q05319|STUB_DROME	182	257	787	35	33	Drosophila melanogaster	Trypsin	2E-044	Tryp_SPc	5E-064	Tryp_SPc	6E-062	Tryp_SPc 6e-062| Tryp_SPc 8e-059| Trypsin 1e-043| COG5640 5e-027| COG3591 | PRK15204 | PTZ00303 | Neogenin_C | WbaP_sugtrans |	7
gi|260908508	gi|260908508	Rhipicephalus sanguineus	Eukaryota; Metazoa; Arthropoda; Chelicerata; Arachnida; Acari; Parasitiformes; Ixodida; Ixodoidea; Ixodidae; Rhipicephalinae; Rhipicephalus; Rhipicephalus.	M	M	125	25	2	cytochrome c oxidase polypeptide Vb	ExpAA=0.00 First60=0.00 PredHel=0 Topology=o	0					BL	17-18	14.331	8.85	12.55	7.6	RGD_cys disintegrin |	1	cytochrome c oxidase polypeptide Vb	5E-071	gi|260908508	270	124	125	100	100	Rhipicephalus sanguineus	Cytochrome c oxidase subunit 5B, mitochondrial	6E-017	sp|P00428|COX5B_BOVIN	85.9	81	129	46	64	Bos taurus	COX5B	7E-015	AgrB	0.46	Cyt_c_Oxidase_V	5E-031	Cyt_c_Oxidase_Vb 5e-031| COX5B 3e-014| PLN02294 7e-009| CdsA | GT1_AviGT4_like | cdsA | PRK06188 | CTP_transf_1 | PTZ00043 | mal_quin_oxido |	15
gi|260908469	gi|260908469	Rhipicephalus sanguineus	Eukaryota; Metazoa; Arthropoda; Chelicerata; Arachnida; Acari; Parasitiformes; Ixodida; Ixodoidea; Ixodidae; Rhipicephalinae; Rhipicephalus; Rhipicephalus.	M	M	125	25	2	cytochrome c oxidase polypeptide Vb	ExpAA=0.00 First60=0.00 PredHel=0 Topology=o	0					BL	17-18	14.346	8.88	12.546	7.58	RGD_cys disintegrin |	1	cytochrome c oxidase polypeptide Vb	7E-070	gi|260908469	266	124	125	100	100	Rhipicephalus sanguineus	Cytochrome c oxidase subunit 5B, mitochondrial	2E-017	sp|P19536|COX5B_MOUSE	87.8	113	128	40	89	Mus musculus	COX5B	1E-015	PTX	0.026	Cyt_c_Oxidase_V	6E-032	Cyt_c_Oxidase_Vb 6e-032| COX5B 4e-015| PLN02294 2e-009| CdsA | cdsA | PRK06188 | PTZ00043 | PTX | CTP_transf_1 | PTX |	15
gi|196476853	gi|196476853	Amblyomma americanum	Eukaryota; Metazoa; Arthropoda; Chelicerata; Arachnida; Acari; Parasitiformes; Ixodida; Ixodoidea; Ixodidae; Amblyomminae; Amblyomma.	M	M	156	264	2	putative secreted protein	ExpAA=1.40 First60=1.40 PredHel=0 Topology=o	0					SIG	18-19	18.005	9.32	16.078	9.38	KTS_cys disintegrin |	1	putative secreted protein	3E-092	gi|196476853	340	155	156	100	100	Amblyomma americanum	Tissue factor pathway inhibitor	0.010	sp|Q02445|TFPI1_RAT	39.3	235	302	36	78	Rattus norvegicus	Kunitz_BPTI	0.062	KU	4E-004	KU	0.040	KU 0.040| KU | Kunitz_BPTI | PRK15021 | PRK12843 | SMP_2 | 2A060602 | PHA02994 | PRK10692 | PRK11246 |	1
gi|196476786	gi|196476786	Amblyomma americanum	Eukaryota; Metazoa; Arthropoda; Chelicerata; Arachnida; Acari; Parasitiformes; Ixodida; Ixodoidea; Ixodidae; Amblyomminae; Amblyomma.	M	M	153	264	2	mechanosensory abnormality family member-like protein precursor	ExpAA=1.47 First60=1.47 PredHel=0 Topology=o	0					SIG	18-19	17.747	9.32	15.82	9.38	KTS_cys disintegrin |	1	putative secreted protein	2E-090	gi|196476853	334	152	156	100	98	Amblyomma americanum	Tissue factor pathway inhibitor	0.009	sp|Q02445|TFPI1_RAT	39.3	235	302	36	78	Rattus norvegicus	Kunitz_BPTI	0.058	KU	4E-004	KU	0.038	KU 0.038| KU | Kunitz_BPTI | PRK15021 | PRK12843 | SMP_2 | 2A060602 | PHA02994 | PRK10692 | PRK11246 |	1
gi|194246039	gi|194246039	Dermacentor variabilis	Eukaryota; Metazoa; Arthropoda; Chelicerata; Arachnida; Acari; Parasitiformes; Ixodida; Ixodoidea; Ixodidae; Rhipicephalinae; Dermacentor.	M	M	214	265	2	putative Kunitz-BPTI protein	ExpAA=0.98 First60=0.97 PredHel=0 Topology=o	0					SIG	18-19	24.728	8.69	22.901	8.64	ECD_cys disintegrin |	1	putative Kunitz-BPTI protein	1E-133	gi|194246039	478	213	214	100	100	Dermacentor variabilis	Carboxypeptidase inhibitor SmCI	9E-014	sp|P84875|PCPI_SABMA	77	162	165	37	99	Sabellastarte magnifica	Kunitz_BPTI	4E-007	KU	8E-009	KU	8E-007	KU 8e-007| Kunitz_BPTI 2e-006| KU 5e-006| PRK10779 | PTZ00396 | PLN02877 | PDCD9 | DUF3447 | GDPD_GDE1 | scrB_fam |	1
gi|167613929	gi|167613929	Dermacentor andersoni	Eukaryota; Metazoa; Arthropoda; Chelicerata; Arachnida; Acari; Parasitiformes; Ixodida; Ixodoidea; Ixodidae; Rhipicephalinae; Dermacentor.	M	M	207	265	2	dathoxin-4	ExpAA=1.35 First60=1.34 PredHel=0 Topology=o	0					SIG	18-19	23.963	8.67	22.09	8.64	ECD_cys disintegrin |	1	dathoxin-4	1E-130	gi|167613929	466	206	207	100	100	Dermacentor andersoni	Papilin	2E-013	sp|O76840|PPN1_CAEEL	75.9	876	2167	30	40	Caenorhabditis elegans	Kunitz_BPTI	4E-007	KU	1E-008	KU	1E-006	KU 1e-006| Kunitz_BPTI 2e-006| KU 7e-006| PRK10779 | PTZ00396 | PLN02877 | PDCD9 | GDPD_GDE1 | DUF3447 | scrB_fam |	1
gi|301130834	gi|301130834	Rhipicephalus microplus	Eukaryota; Metazoa; Arthropoda; Chelicerata; Arachnida; Acari; Parasitiformes; Ixodida; Ixodoidea; Ixodidae; Rhipicephalinae; Rhipicephalus; Boophilus.	F	F	2727	282	1	papilin	ExpAA=0.03 First60=0.00 PredHel=0 Topology=o	0					CYT		295.839	5			RGD_cys disintegrin |KGD_cys disintegrin |	2	papilin	0.0	gi|301130834	6019	2726	2727	100	100	Rhipicephalus microplus	Papilin	0.0	sp|Q868Z9|PPN_DROME	1017	2797	2898	33	97	Drosophila melanogaster	ADAM_spacer1	1E-039	KU	2E-016	ADAM_spacer1	6E-039	ADAM_spacer1 6e-039| KU 4e-014| Kunitz_BPTI 4e-014| PLN02590 2e-013| KU 5e-013| I-set 7e-011| IG_like 1e-010| IG 1e-010| Ig2_FGFRL1-like 1e-008| IGc2 2e-008|	220
gi|325303786	gi|325303786	Amblyomma variegatum	Eukaryota; Metazoa; Arthropoda; Chelicerata; Arachnida; Acari; Parasitiformes; Ixodida; Ixodoidea; Ixodidae; Amblyomminae; Amblyomma.	M	M	187	285	1	secreted stromal cell-derived factor 2	ExpAA=21.78 First60=21.78 PredHel=1 Topology=i12-34o	1	11.8	81.8	6.4		SIG	28-29	20.621	6.34	17.525	6.12	RGD_cys disintegrin |	1	TPA_inf: secreted stromal cell-derived factor 2	1E-110	gi|325303786	399	186	187	100	100	Amblyomma variegatum	Stromal cell-derived factor 2-like protein 1	1E-053	sp|Q9ESP1|SDF2L_MOUSE	208	175	221	57	80	Mus musculus	MIR	5E-012	MIR	3E-006	PMT1	9E-017	PMT1 9e-017| MIR 2e-011| MIR 3e-004| COG1542 | PRK05690 | M20_like | PRK05590 | moeB | PRK08276 | RINT1_TIP1 |	6
gi|325303714	gi|325303714	Amblyomma variegatum	Eukaryota; Metazoa; Arthropoda; Chelicerata; Arachnida; Acari; Parasitiformes; Ixodida; Ixodoidea; Ixodidae; Amblyomminae; Amblyomma.	M	M	92	286	1	hypothetical secreted protein 316	ExpAA=4.02 First60=4.02 PredHel=0 Topology=o	0					SIG	27-28	10.186	11.04	7.414	11.35	KTS_cys disintegrin |	1	TPA_inf: hypothetical secreted protein 316	5E-047	gi|325303714	190	91	92	100	100	Amblyomma variegatum	Beta-bungarotoxin BF B2 chain	0.29	sp|B2KTG3|IVBI2_BUNFA	33.9	77	85	32	92	Bungarus fasciatus	DUF1646	0.81	MD	0.29	COG3521	1.0	COG3521 | PRK02710 | UhpB | PRK10814 |	36
gi|325303218	gi|325303218	Amblyomma variegatum	Eukaryota; Metazoa; Arthropoda; Chelicerata; Arachnida; Acari; Parasitiformes; Ixodida; Ixodoidea; Ixodidae; Amblyomminae; Amblyomma.	M	M	227	287	1	salivary mucin	ExpAA=20.68 First60=20.68 PredHel=1 Topology=i13-35o	1	9.7	84.6	5.7		SIG	29-30	23.888	4.26	20.941	4.15	RGD_cys disintegrin |	1	TPA_inf: salivary mucin	1E-124	gi|325303218	449	226	227	100	100	Amblyomma variegatum	Peritrophin-1	4E-012	sp|O76217|PE1_ANOGA	71.6	148	153	40	97	Anopheles gambiae	CBM_14	6E-012	ChtBD2	7E-015	ChtBD2	8E-013	ChtBD2 8e-013| CBM_14 3e-011| rne 4e-005| PHA03269 | PRK10431 | TRI5 | Tellurium_res | PRK06725 | VP7 | IlvB |	27
gi|325303216	gi|325303216	Amblyomma variegatum	Eukaryota; Metazoa; Arthropoda; Chelicerata; Arachnida; Acari; Parasitiformes; Ixodida; Ixodoidea; Ixodidae; Amblyomminae; Amblyomma.	M	M	246	288	1	peritrophin	ExpAA=20.69 First60=20.69 PredHel=1 Topology=i13-35o	1	8.9	85.8	5.3		SIG	29-30	25.878	4.31	22.953	4.2	RGD_cys disintegrin |	1	TPA_inf: peritrophin	1E-136	gi|325303216	488	245	246	100	100	Amblyomma variegatum	Peritrophin-1	5E-012	sp|O76217|PE1_ANOGA	71.6	148	153	40	97	Anopheles gambiae	CBM_14	3E-012	ChtBD2	3E-015	ChtBD2	4E-013	ChtBD2 4e-013| CBM_14 1e-011| rne 1e-004| PHA03269 | PRK06725 | TRI5 | PRK10808 | FRQ | PRK10431 | PTZ00182 |	27
gi|325303070	gi|325303070	Amblyomma variegatum	Eukaryota; Metazoa; Arthropoda; Chelicerata; Arachnida; Acari; Parasitiformes; Ixodida; Ixodoidea; Ixodidae; Amblyomminae; Amblyomma.	M	M	229	289	1	serine proteinase inhibitor	ExpAA=0.02 First60=0.02 PredHel=0 Topology=o	0					SIG	21-22	26.719	8	24.609	7.84	KTS_cys disintegrin |	1	TPA_inf: serine proteinase inhibitor	1E-143	gi|325303070	510	228	229	100	100	Amblyomma variegatum	Papilin	1E-014	sp|Q868Z9|PPN_DROME	80.1	765	2898	28	26	Drosophila melanogaster	Kunitz_BPTI	6E-004	KU	1E-006	KU	1E-004	KU 1e-004| KU 0.001| Kunitz_BPTI 0.003| PLN02807 | COG5270 | PTZ00477 | PRK00783 |	1
gi|325303018	gi|325303018	Amblyomma variegatum	Eukaryota; Metazoa; Arthropoda; Chelicerata; Arachnida; Acari; Parasitiformes; Ixodida; Ixodoidea; Ixodidae; Amblyomminae; Amblyomma.	L	L	230	290	1	nucleotide binding protein 2	ExpAA=0.25 First60=0.24 PredHel=0 Topology=o	0					BL	34-35	24.739	5.97	21.43	5.47	MLD_cys disintegrin |	1	TPA_inf: nucleotide binding protein 2	1E-131	gi|325303018	471	229	230	100	100	Amblyomma variegatum	Cytosolic Fe-S cluster assembly factor NUBP2	9E-095	sp|Q68FS1|NUBP2_RAT	346	229	271	67	85	Rattus norvegicus	ParA	6E-034	AAA	0.009	MRP-like	2E-068	MRP-like 2e-068| Mrp 9e-053| PRK11670 3e-049| ParA 3e-033| COG0455 5e-015| MinD 8e-015| CbiA 2e-014| ArsA 2e-012| COG1149 3e-012| minD_arch 4e-012|	222
gi|325303000	gi|325303000	Amblyomma variegatum	Eukaryota; Metazoa; Arthropoda; Chelicerata; Arachnida; Acari; Parasitiformes; Ixodida; Ixodoidea; Ixodidae; Amblyomminae; Amblyomma.	S	S	198	291	1	C2H2-type Zn-finger protein	ExpAA=0.00 First60=0.00 PredHel=0 Topology=o	0					CYT		21.237	9.37			KTS_cys disintegrin |	1	TPA_inf: C2H2-type Zn-finger protein	1E-116	gi|325303000	422	197	198	100	100	Amblyomma variegatum	Zinc finger protein 764	1E-029	sp|Q96H86|ZN764_HUMAN	129	231	408	48	57	Homo sapiens	zf-C2H2	0.015	ZnF_C2H2	5E-004	PRK12323	6E-004	PRK12323 6e-004| COG5048 0.004| kgd 0.025| PLN02983 0.034| COG5236 0.038| ZnF_C2H2 0.052| PDHac_trf_long 0.056| PRK10856 0.069| SFP1 0.071| zf-C2H2 0.074|	12
gi|325302966	gi|325302966	Amblyomma variegatum	Eukaryota; Metazoa; Arthropoda; Chelicerata; Arachnida; Acari; Parasitiformes; Ixodida; Ixodoidea; Ixodidae; Amblyomminae; Amblyomma.	D	D	388	292	1	glycine dehydrogenase	ExpAA=0.61 First60=0.00 PredHel=0 Topology=o	0					CYT		42.972	6.11			KGD_cys disintegrin |	1	TPA_inf: glycine dehydrogenase	0.0	gi|325302966	781	387	388	100	100	Amblyomma variegatum	Glycine dehydrogenase	1E-146	sp|Q91W43|GCSP_MOUSE	519	561	1025	65	55	Mus musculus	GDC-P	1E-118	Aamy	0.15	PRK05367	0.0	PRK05367 | PLN02414 e-162| gcvP e-134| PRK12566 e-125| GDC-P e-117| GcvP 3e-094| GDC-P 1e-089| PRK00451 3e-064| GcvP 1e-032| PRK04366 2e-014|	223
gi|325302958	gi|325302958	Amblyomma variegatum	Eukaryota; Metazoa; Arthropoda; Chelicerata; Arachnida; Acari; Parasitiformes; Ixodida; Ixodoidea; Ixodidae; Amblyomminae; Amblyomma.	Y	Y	205	293	1	asparaginase	ExpAA=0.00 First60=0.00 PredHel=0 Topology=o	0					CYT		22.321	9.18			RTS_cys disintegrin |	1	TPA_inf: asparaginase	1E-117	gi|325302958	424	204	205	100	100	Amblyomma variegatum	N(4)-(Beta-N-acetylglucosaminyl)-L-asparaginase (Fragment)	3E-064	sp|O02467|ASPG_SPOFR	244	204	320	59	64	Spodoptera frugiperda	Asparaginase_2	3E-050	ZnF_TAZ	0.81	Glycosylasparag	8E-060	Glycosylasparaginase 8e-060| Asparaginase_2 1e-049| COG1446 3e-031| ASRGL1_like 3e-021| PLN02689 5e-021| Ntn_Asparaginase_2_like 2e-020| Asparaginase_2 7e-019| PRK10226 7e-018| Asparaginase_2_like 9e-013| PLN02937 2e-009|	224
gi|325302834	gi|325302834	Amblyomma variegatum	Eukaryota; Metazoa; Arthropoda; Chelicerata; Arachnida; Acari; Parasitiformes; Ixodida; Ixodoidea; Ixodidae; Amblyomminae; Amblyomma.	V	V	176	294	1	trypsin-like serine protease	ExpAA=0.01 First60=0.00 PredHel=0 Topology=o	0					CYT		19.639	6.08			KGD_cys disintegrin |	1	TPA_inf: trypsin-like serine protease	1E-104	gi|325302834	379	175	176	100	100	Amblyomma variegatum	Serine proteinase stubble	2E-033	sp|Q05319|STUB_DROME	141	147	787	43	19	Drosophila melanogaster	Trypsin	2E-031	Tryp_SPc	7E-047	Tryp_SPc	7E-045	Tryp_SPc 7e-045| Tryp_SPc 9e-043| Trypsin 8e-031| COG5640 2e-013| PTZ00303 | IFRD | DUF1986 | PRK00979 | Aminotran_5 | PRK02362 |	7
gi|325302736	gi|325302736	Amblyomma variegatum	Eukaryota; Metazoa; Arthropoda; Chelicerata; Arachnida; Acari; Parasitiformes; Ixodida; Ixodoidea; Ixodidae; Amblyomminae; Amblyomma.	M	M	177	295	1	serine proteinase inhibitor	ExpAA=0.01 First60=0.01 PredHel=0 Topology=o	0					SIG	18-19	19.53	7.51	17.693	7.99	KTS_cys disintegrin |	1	TPA: serine proteinase inhibitor	1E-107	gi|325302736	390	176	177	100	100	Amblyomma variegatum	Carboxypeptidase inhibitor SmCI	3E-013	sp|P84875|PCPI_SABMA	74.7	161	165	35	98	Sabellastarte magnifica	Kunitz_BPTI	2E-011	KU	7E-012	Kunitz_BPTI	8E-011	Kunitz_BPTI 8e-011| KU 6e-010| KU 6e-010| PRK09169 | PHA03332 | deg-1 | COG3341 | PBP1_GC_C_enterotoxin_receptor |	1
gi|325302602	gi|325302602	Amblyomma variegatum	Eukaryota; Metazoa; Arthropoda; Chelicerata; Arachnida; Acari; Parasitiformes; Ixodida; Ixodoidea; Ixodidae; Amblyomminae; Amblyomma.	M	M	205	296	1	hypothetical secreted protein 204	ExpAA=0.04 First60=0.04 PredHel=0 Topology=o	0					SIG	18-19	23.493	9.2	21.486	9.24	KGD_cys disintegrin |	1	TPA_inf: hypothetical secreted protein 204	1E-130	gi|325302602	466	204	205	100	100	Amblyomma variegatum	Zonadhesin	7E-010	sp|O88799|ZAN_MOUSE	63.9	4022	5376	31	75	Mus musculus	TIL	1E-005	VPS10	0.074	TIL	7E-005	TIL 7e-005| PRK12831 | PLN03024 |	1
gi|215275255	gi|215275255	Rhipicephalus sanguineus	Eukaryota; Metazoa; Arthropoda; Chelicerata; Arachnida; Acari; Parasitiformes; Ixodida; Ixodoidea; Ixodidae; Rhipicephalinae; Rhipicephalus; Rhipicephalus.	M	M	86	298	1	Evasin-3; Flags: Precursor	ExpAA=0.02 First60=0.02 PredHel=0 Topology=o	0					SIG	20-21	9.156	8.21	7.014	6.73	RTS_cys disintegrin |	1	Evasin-3; Flags: Precursor	3E-044	gi|215275255	181	85	86	100	100		Evasin-3	1E-045	sp|P0C8E8|EVA3_RHISA	181	85	86	100	100	Rhipicephalus sanguineus	RhgB_N	2.7	PIPKc	0.40	PRK07049	0.16	PRK07049 | 34 |	36
gi|281188148	gi|281188148	Rhipicephalus appendiculatus	Eukaryota; Metazoa; Arthropoda; Chelicerata; Arachnida; Acari; Parasitiformes; Ixodida; Ixodoidea; Ixodidae; Rhipicephalinae; Rhipicephalus; Rhipicephalus.	M	M	654	299	1	gut cell surface glycoprotein	ExpAA=7.14 First60=0.20 PredHel=0 Topology=o	0					SIG	19-20	71.83	5.91	69.936	5.91	VGD_cys disintegrin |RTS_cys disintegrin |	2	gut cell surface glycoprotein	0.0	gi|281188148	1404	653	654	100	100	Rhipicephalus appendiculatus	Glycoprotein antigen BM86	0.0	sp|P20736|BM86_BOOMI	1023	647	650	73	100	Boophilus microplus	Sporozoite_P67	0.001	POLBc	0.24	Sporozoite_P67	0.006	Sporozoite_P67 0.006| gltX | vWA_Matrilin |	3
gi|312838493	gi|312838493	Hyalomma marginatum marginatum	Eukaryota; Metazoa; Arthropoda; Chelicerata; Arachnida; Acari; Parasitiformes; Ixodida; Ixodoidea; Ixodidae; Hyalomminae; Hyalomma.	M	M	664	304	1	Hm86 protein	ExpAA=19.24 First60=19.03 PredHel=1 Topology=i5-24o	1	2.9	96.4	0.8		SIG	24-25	72.285	5.96	69.927	5.96	VGD_cys disintegrin |	1	Hm86 protein	0.0	gi|312838493	1427	663	664	100	100	Hyalomma marginatum marginatum	Glycoprotein antigen BM86	0.0	sp|P20736|BM86_BOOMI	920	643	650	65	99	Boophilus microplus	ASC	0.85	Sema	0.93	gltX	0.37	gltX | PRK09709 | ASC | cEGF | PHA03069 |	3
gi|312838491	gi|312838491	Dermacentor reticulatus	Eukaryota; Metazoa; Arthropoda; Chelicerata; Arachnida; Acari; Parasitiformes; Ixodida; Ixodoidea; Ixodidae; Rhipicephalinae; Dermacentor.	M	M	664	305	1	Dr86 protein	ExpAA=0.31 First60=0.12 PredHel=0 Topology=o	0					SIG	19-20	73.336	5.96	71.469	5.85	KTS_cys disintegrin |	1	Dr86 protein	0.0	gi|312838491	1420	663	664	100	100	Dermacentor reticulatus	Glycoprotein antigen BM86	0.0	sp|P20736|BM86_BOOMI	728	647	650	53	100	Boophilus microplus	VESA1_N	0.061	STI	0.94	VESA1_N	0.34	VESA1_N | OM_YfiO | OATP | vWA_Matrilin |	3
gi|312838489	gi|312838489	Rhipicephalus evertsi evertsi	Eukaryota; Metazoa; Arthropoda; Chelicerata; Arachnida; Acari; Parasitiformes; Ixodida; Ixodoidea; Ixodidae; Rhipicephalinae; Rhipicephalus; Rhipicephalus.	M	M	680	306	1	Ree86 protein	ExpAA=12.67 First60=2.79 PredHel=0 Topology=o	0					BL	44-45	75.171	6.29	70.128	6.02	RTS_cys disintegrin |	1	Ree86 protein	0.0	gi|312838489	1461	679	680	100	100	Rhipicephalus evertsi evertsi	Glycoprotein antigen BM86	0.0	sp|P20736|BM86_BOOMI	1187	648	650	84	100	Boophilus microplus	Spheroidin	0.17	EGF_CA	0.31	vWA_Matrilin	0.083	vWA_Matrilin 0.083| Spheroidin | cEGF | EGF_CA |	3
gi|312838485	gi|312838485	Haemaphysalis elliptica	Eukaryota; Metazoa; Arthropoda; Chelicerata; Arachnida; Acari; Parasitiformes; Ixodida; Ixodoidea; Ixodidae; Haemaphysalinae; Haemaphysalis.	M	M	597	307	1	ATAQ protein	ExpAA=2.74 First60=0.84 PredHel=0 Topology=o	0					SIG	19-20	65.658	5.47	63.682	5.47	RED_cys disintegrin |	1	ATAQ protein	0.0	gi|312838485	1282	596	597	100	100	Haemaphysalis elliptica	Glycoprotein antigen BM86	5E-034	sp|P20736|BM86_BOOMI	146	614	650	23	95	Boophilus microplus	RAP1	0.040	Amelin	5.0	RAP1	0.22	RAP1 | Sporozoite_P67 | Metaviral_G | PRK10672 | rad23 | Trypan_PARP | PHA03291 | TFIIF_alpha | PRK14950 | PHA03270 |	3
gi|261278551	gi|261278551	Rhipicephalus microplus	Eukaryota; Metazoa; Arthropoda; Chelicerata; Arachnida; Acari; Parasitiformes; Ixodida; Ixodoidea; Ixodidae; Rhipicephalinae; Rhipicephalus; Boophilus.	H	H	90	309	1	Chain A, Nmr Structure Of Microplusin A Antimicrobial Peptide From Rhipicephalus (Boophilus) Microplus	ExpAA=0.00 First60=0.00 PredHel=0 Topology=o	0					CYT		10.22	5.16			KGD_cys disintegrin |	1	Chain A, Nmr Structure Of Microplusin A Antimicrobial Peptide From Rhipicephalus	6E-048	gi|261278551	193	89	90	100	100		Antimicrobial peptide microplusin	2E-049	sp|Q86LE5|MPSIN_BOOMI	193	89	110	100	82	Boophilus microplus	Usher	0.60	TLDc	0.73	PRK12389	0.22	PRK12389 | RT_ZFREV_like | PRK15054 | TOS9 | PRK14844 | Usher | PRK04870 | PHA03246 | dinG |	26
gi|307933356	gi|307933356	Haemaphysalis longicornis	Eukaryota; Metazoa; Arthropoda; Chelicerata; Arachnida; Acari; Parasitiformes; Ixodida; Ixodoidea; Ixodidae; Haemaphysalinae; Haemaphysalis.	M	M	1694	310	1	Vitellogenin-1	ExpAA=5.05 First60=5.05 PredHel=0 Topology=o	0					SIG	22-23	197	6.03	194.893	6	RED_cys disintegrin |	1	Vitellogenin-1	0.0	gi|307933356	3514	1693	1694	100	100	Haemaphysalis longicornis	Vitellogenin-6	2E-049	sp|Q94637|VIT6_OSCBR	199	1524	1660	20	92	Oscheius brevesophaga	Vitellogenin_N	2E-072	LPD_N	2E-069	Vitellogenin_N	1E-071	Vitellogenin_N 1e-071| LPD_N 3e-067| DUF1943 2e-022| VWD 2e-010| VWD 3e-010| PLN03244 0.031| Borrelia_orfA | PLN02960 | PRK14335 | PHA03356 |	228
gi|307006447	gi|307006447	Hyalomma marginatum rufipes	Eukaryota; Metazoa; Arthropoda; Chelicerata; Arachnida; Acari; Parasitiformes; Ixodida; Ixodoidea; Ixodidae; Hyalomminae; Hyalomma.	M	M	154	311	1	hypothetical secreted protein of the basic tail family	ExpAA=0.01 First60=0.01 PredHel=0 Topology=o	0					SIG	16-17	16.692	9.31	15.023	9.38	RGD_cys disintegrin |	1	hypothetical secreted protein of the basic tail family	1E-089	gi|307006447	332	153	154	100	100	Hyalomma marginatum rufipes	Histone H1B	0.002	sp|P40276|H1B_CHITE	41.2	145	232	44	63	Chironomus tentans	TSGP1	0.001	PTBI	0.92	rplD	0.001	rplD 0.001| PRK13808 0.002| TSGP1 0.004| PTZ00144 0.008| PRK06319 0.012| PRK07561 0.015| PRK14552 0.026| PRK10905 0.033| CDC27 0.048| RNase_H2-Ydr279 0.062|	37
gi|307006495	gi|307006495	Hyalomma marginatum rufipes	Eukaryota; Metazoa; Arthropoda; Chelicerata; Arachnida; Acari; Parasitiformes; Ixodida; Ixodoidea; Ixodidae; Hyalomminae; Hyalomma.	M	M	219	312	1	lipocalin group IV subgroup metastriate	ExpAA=0.12 First60=0.12 PredHel=0 Topology=o	0					SIG	17-18	25.038	4.61	23.264	4.55	RGD_cys disintegrin |	1	lipocalin group IV subgroup metastriate	1E-127	gi|307006495	456	218	219	100	100	Hyalomma marginatum rufipes	Membrane-bound lytic murein transglycosylase F	1.5	sp|Q30PQ0|MLTF_SULDN	33.1	81	467	26	18	Sulfurimonas denitrificans (strain ATCC 33889 / DSM 1251)	His_binding	0.012	CAP10	0.24	His_binding	0.058	His_binding 0.058| nfrB | PRK05580 | VapI | cas_Cas5t | Trep_dent_lipo | PRK14716 | HAD-1A3-hyp | truB |	28
gi|307006469	gi|307006469	Hyalomma marginatum rufipes	Eukaryota; Metazoa; Arthropoda; Chelicerata; Arachnida; Acari; Parasitiformes; Ixodida; Ixodoidea; Ixodidae; Hyalomminae; Hyalomma.	M	M	233	313	1	lipocalin group II group II b	ExpAA=0.11 First60=0.11 PredHel=0 Topology=o	0					SIG	17-18	26.561	4.53	24.796	4.48	RGD_cys disintegrin |	1	lipocalin group II group II b	1E-134	gi|307006469	481	232	233	100	100	Hyalomma marginatum rufipes	Membrane-bound lytic murein transglycosylase F	0.56	sp|Q30PQ0|MLTF_SULDN	34.7	81	467	26	18	Sulfurimonas denitrificans (strain ATCC 33889 / DSM 1251)	His_binding	0.019	MCM	0.57	His_binding	0.097	His_binding 0.097| nfrB | PRK05580 | TruD | VapI | PRK14716 | HAD-1A3-hyp | Trep_dent_lipo | PRK13434 |	28
gi|18958004	gi|18958004	Rhipicephalus appendiculatus	Eukaryota; Metazoa; Arthropoda; Chelicerata; Arachnida; Acari; Parasitiformes; Ixodida; Ixodoidea; Ixodidae; Rhipicephalinae; Rhipicephalus; Rhipicephalus.	M	M	461	314	1	midgut serine proteinase-3	ExpAA=1.08 First60=0.18 PredHel=0 Topology=o	0					SIG	15-16	49.6	8.26	48.118	8.13	ECD_cys disintegrin |	1	midgut serine proteinase-3	0.0	gi|18958004	947	460	461	100	100	Rhipicephalus appendiculatus	Atrial natriuretic peptide-converting enzyme	4E-030	sp|Q9Z319|CORIN_MOUSE	132	771	1113	35	69	Mus musculus	Trypsin	8E-036	Tryp_SPc	6E-046	Tryp_SPc	7E-044	Tryp_SPc 7e-044| Tryp_SPc 8e-044| Trypsin 5e-035| CUB 6e-013| CUB 2e-011| CUB 8e-010| LDLa 8e-009| Ldl_recept_a 9e-008| LDLa 2e-007| COG5640 1e-006|	229
gi|18958000	gi|18958000	Rhipicephalus appendiculatus	Eukaryota; Metazoa; Arthropoda; Chelicerata; Arachnida; Acari; Parasitiformes; Ixodida; Ixodoidea; Ixodidae; Rhipicephalinae; Rhipicephalus; Rhipicephalus.	M	M	298	315	1	midgut serine proteinase-1	ExpAA=1.72 First60=1.72 PredHel=0 Topology=o	0					SIG	22-23	32.332	5.12	30.22	5.13	KGD_cys disintegrin |	1	midgut serine proteinase-1	1E-180	gi|18958000	635	297	298	100	100	Rhipicephalus appendiculatus	Chymotrypsinogen A	1E-030	sp|P00766|CTRA_BOVIN	133	244	245	32	100	Bos taurus	Trypsin	7E-036	Tryp_SPc	3E-048	Tryp_SPc	3E-047	Tryp_SPc 3e-047| Tryp_SPc 3e-046| Trypsin 4e-035| COG5640 3e-009| DUF1986 2e-004| COG3591 0.013| DUF316 0.067| MdoG | COG1204 | COG2033 |	7
gi|3913368	gi|3913368	Rhipicephalus microplus	Eukaryota; Metazoa; Arthropoda; Chelicerata; Arachnida; Acari; Parasitiformes; Ixodida; Ixodoidea; Ixodidae; Rhipicephalinae; Rhipicephalus; Boophilus.	A	A	69	316	1	Protease inhibitor carrapatin	ExpAA=0.33 First60=0.33 PredHel=0 Topology=o	0					CYT		7.861	4.34			ECD_cys disintegrin |	1	Protease inhibitor carrapatin	3E-038	gi|3913368	161	68	69	100	100		Protease inhibitor carrapatin	1E-039	sp|P81162|CRPTI_BOOMI	161	68	69	100	100	Boophilus microplus	Kunitz_BPTI	1E-015	KU	1E-015	Kunitz_BPTI	7E-015	Kunitz_BPTI 7e-015| KU 2e-013| KU 3e-012| GH43_6 | proteasome_beta_type_6 | M1_TAF2 | SCA7 |	1
gi|28932710	gi|28932710	Rhipicephalus appendiculatus	Eukaryota; Metazoa; Arthropoda; Chelicerata; Arachnida; Acari; Parasitiformes; Ixodida; Ixodoidea; Ixodidae; Rhipicephalinae; Rhipicephalus; Rhipicephalus.	M	M	195	317	1	20/24 kDa immunodominant saliva protein	ExpAA=34.70 First60=34.69 PredHel=1 Topology=i7-29o	1	11.3	85.1	3.6		SIG	19-20	19.724	9.41	17.844	9.4	RTS_cys disintegrin |	1	20/24 kDa immunodominant saliva protein	1E-113	gi|28932710	412	194	195	100	100	Rhipicephalus appendiculatus	WAS/WASL-interacting protein family member 1	2E-004	sp|Q8K1I7|WIPF1_MOUSE	45.4	274	493	32	56	Mus musculus	Herpes_U47	0.019	Alpha_TIF	1.6	PLN02217	0.002	PLN02217 0.002| Herpes_U47 0.094| Prox1 | DEC-1_N | PRK14276 | PRK14965 | PHA03247 | BioY | Pneumo_att_G | Herpes_BLLF1 |	29
gi|22770986	gi|22770986	Rhipicephalus microplus	Eukaryota; Metazoa; Arthropoda; Chelicerata; Arachnida; Acari; Parasitiformes; Ixodida; Ixodoidea; Ixodidae; Rhipicephalinae; Rhipicephalus; Boophilus.	M	M	2428	319	1	notch-like protein	ExpAA=45.88 First60=22.28 PredHel=1 Topology=i7-29o	1	0.9	98.8	0.3		SIG	27-28	260.952	5.05	258.273	5.02	RTS_cys disintegrin |ECD_cys disintegrin |	2	notch-like protein	0.0	gi|22770986	5321	2427	2428	100	100	Rhipicephalus microplus	Neurogenic locus Notch protein	0.0	sp|P07207|NOTCH_DROME	2779	2650	2703	53	98	Drosophila melanogaster	NOD	3E-023	EGF_CA	6E-008	ANK	5E-024	ANK 5e-024| NOD 2e-022| DUF3454 5e-022| PHA03100 3e-017| PHA02875 6e-016| Ank_2 3e-015| NODP 2e-014| Arp 3e-014| PHA03095 5e-014| PAT1 1e-013|	30
gi|37787184	gi|37787184	Dermacentor variabilis	Eukaryota; Metazoa; Arthropoda; Chelicerata; Arachnida; Acari; Parasitiformes; Ixodida; Ixodoidea; Ixodidae; Rhipicephalinae; Dermacentor.	M	M	596	348	1	acetylcholinesterase	ExpAA=13.22 First60=13.18 PredHel=0 Topology=o	0					BL	35-36	65.64	4.63	61.985	4.68	RED_cys disintegrin |	1	acetylcholinesterase	0.0	gi|37787184	1226	595	596	100	100	Dermacentor variabilis	Acetylcholinesterase	1E-144	sp|Q869C3|ACES_ANOGA	511	543	737	49	74	Anopheles gambiae	COesterase	1E-166	MeTrc	0.71	COesterase	1E-166	COesterase e-166| Esterase_lipase e-124| PnbA 1e-082| Abhydrolase_3 3e-012| Aes 6e-012| Esterase 4e-004| PRK10162 0.017| Fes 0.069| Abhydrolase_5 0.086| Abhydrolase_6 |	9
gi|260908632	gi|260908632	Rhipicephalus sanguineus	Eukaryota; Metazoa; Arthropoda; Chelicerata; Arachnida; Acari; Parasitiformes; Ixodida; Ixodoidea; Ixodidae; Rhipicephalinae; Rhipicephalus; Rhipicephalus.	K	K	122	349	1	serine proteinase inhibitor	ExpAA=0.00 First60=0.00 PredHel=0 Topology=o	0					CYT		14.08	9.18			KTS_cys disintegrin |	1	serine proteinase inhibitor	5E-070	gi|260908632	266	121	122	100	100	Rhipicephalus sanguineus	Protein AMBP	1E-009	sp|Q62577|AMBP_MERUN	62	99	346	33	29	Meriones unguiculatus	Kunitz_BPTI	4E-007	KU	3E-007	Kunitz_BPTI	2E-006	Kunitz_BPTI 2e-006| KU 2e-005| KU 9e-005| PLN02427 0.021| PRK15314 0.078| PRK14901 | Hamartin | Ube1 | PRK03705 | PLN02281 |	1
gi|260908574	gi|260908574	Rhipicephalus sanguineus	Eukaryota; Metazoa; Arthropoda; Chelicerata; Arachnida; Acari; Parasitiformes; Ixodida; Ixodoidea; Ixodidae; Rhipicephalinae; Rhipicephalus; Rhipicephalus.	M	M	119	350	1	evasin	ExpAA=3.85 First60=3.85 PredHel=0 Topology=o	0					SIG	19-20	12.771	8.44	10.617	8.17	ECD_cys disintegrin |	1	evasin	2E-066	gi|260908574	255	118	119	100	100	Rhipicephalus sanguineus	Evasin-1	0.012	sp|P0C8E7|EVA1_RHISA	38.5	74	114	28	66	Rhipicephalus sanguineus	DUF2338	2.8	FN3	1.4	PTZ00328	0.87	PTZ00328 | PRK14466 | PLN02680 | PLN03218 | PRK08211 |	231
gi|260908572	gi|260908572	Rhipicephalus sanguineus	Eukaryota; Metazoa; Arthropoda; Chelicerata; Arachnida; Acari; Parasitiformes; Ixodida; Ixodoidea; Ixodidae; Rhipicephalinae; Rhipicephalus; Rhipicephalus.	M	M	120	351	1	putative secreted salivary protein	ExpAA=13.67 First60=13.67 PredHel=1 Topology=o5-24i	1	15.8	4.2	80		BL	23-24	13.185	6.77	10.49	5.81	MLD_cys disintegrin |	1	putative secreted salivary protein	2E-070	gi|260908572	268	119	120	100	100	Rhipicephalus sanguineus	Kielin/chordin-like protein	0.86	sp|Q9IBG7|KCP_XENLA	32.3	94	2327	24	4	Xenopus laevis	DUF1188	0.34	TyrKc	1.0	DUF1188	1.5	DUF1188 | Aldose_epim | DFP | W_rich_C | GltS | PHA03026 | PTZ00482 |	232
gi|260908518	gi|260908518	Rhipicephalus sanguineus	Eukaryota; Metazoa; Arthropoda; Chelicerata; Arachnida; Acari; Parasitiformes; Ixodida; Ixodoidea; Ixodidae; Rhipicephalinae; Rhipicephalus; Rhipicephalus.	M	M	150	352	1	hypothetical protein	ExpAA=0.00 First60=0.00 PredHel=0 Topology=o	0					SIG	19-20	17.158	8.8	15.215	9.03	RTS_cys disintegrin |	1	hypothetical protein	9E-086	gi|260908518	319	149	150	100	100	Rhipicephalus sanguineus	Tissue factor pathway inhibitor 2	2E-007	sp|Q7YRQ8|TFPI2_BOVIN	54.7	152	234	30	65	Bos taurus	Kunitz_BPTI	4E-006	KU	4E-007	Kunitz_BPTI	2E-005	Kunitz_BPTI 2e-005| KU 3e-005| KU 4e-004| PRK00955 | PRK14898 | C2B_Munc13-like | C2_RGS-like |	1
gi|260908493	gi|260908493	Rhipicephalus sanguineus	Eukaryota; Metazoa; Arthropoda; Chelicerata; Arachnida; Acari; Parasitiformes; Ixodida; Ixodoidea; Ixodidae; Rhipicephalinae; Rhipicephalus; Rhipicephalus.	M	M	123	353	1	mucin-like protein	ExpAA=19.24 First60=19.23 PredHel=1 Topology=i5-23o	1	14.6	81.3	4.1		SIG	25-26	13.435	4.49	10.868	4.36	KGD_cys disintegrin |	1	mucin-like protein	1E-066	gi|260908493	255	122	123	100	100	Rhipicephalus sanguineus	Peritrophin-1	7E-009	sp|O76217|PE1_ANOGA	59.3	152	153	36	100	Anopheles gambiae	CBM_14	5E-009	ChtBD2	2E-010	ChtBD2	1E-008	ChtBD2 1e-008| CBM_14 2e-008| EpsF | PRK05346 | PLN02982 | PRK13528 | PLN02443 | PRK11700 | ndhG | COG3907 |	27
gi|260908463	gi|260908463	Rhipicephalus sanguineus	Eukaryota; Metazoa; Arthropoda; Chelicerata; Arachnida; Acari; Parasitiformes; Ixodida; Ixodoidea; Ixodidae; Rhipicephalinae; Rhipicephalus; Rhipicephalus.	M	M	89	354	1	defensin	ExpAA=22.52 First60=22.52 PredHel=1 Topology=i7-29o	1	24.7	67.4	7.9		SIG	19-20	9.62	6.52	7.628	6.73	RGD_cys disintegrin |	1	defensin	4E-047	gi|260908463	191	88	89	100	100	Rhipicephalus sanguineus	Integrin beta-like protein A	1.9	sp|Q54KF7|SIBA_DICDI	31.2	46	1927	35	2	Dictyostelium discoideum	DUF1211	2.4	PlsC	0.32	PRK09098	1.3	PRK09098 | PRK15397 | PHA03042 | LPLAT_AGPAT-like |	1
gi|260908354	gi|260908354	Rhipicephalus sanguineus	Eukaryota; Metazoa; Arthropoda; Chelicerata; Arachnida; Acari; Parasitiformes; Ixodida; Ixodoidea; Ixodidae; Rhipicephalinae; Rhipicephalus; Rhipicephalus.	M	M	67	355	1	hypothetical secreted peptide precursor	ExpAA=17.29 First60=17.29 PredHel=1 Topology=i5-27o	1	32.8	59.7	7.5		SIG	23-24	7.058	6.79	4.695	6.27	KGD_cys disintegrin |	1	hypothetical secreted peptide precursor	1E-035	gi|260908354	152	66	67	100	100	Rhipicephalus sanguineus	Potassium channel toxin alpha-KTx 6.11	1.9	sp|P0C194|KAX6B_OPIMA	31.2	56	63	33	90	Opisthacanthus madagascariensis	DUF2973	1.1	TR_FER	4.8	PPOX_FMN_DR2398	3.7	PPOX_FMN_DR2398 |	1
[truncated: 746 more rows]
[truncated: 25 more columns]

## Sheet: All seqs
Seq name	First residue	First residue	Seq size	Description	Species	SigP Result	Cleavage Position	MW	pI	Mature MW	pI	Disintegrin result	Number of domains
[truncated: 59,372 more rows]

## Sheet: Summary table
Includes proteins >95% similarity				Does not include proteins with > 95% similarity
[truncated: 11 more rows]
